# Supplementary material for: Comprehensive Cervical Cancer Prevention in Tanzania (CONCEPT) study: Cohort profile
Source: PubMed Central journal article supplement — BMJ Open. 2020 Sep 18;10(9):e038531. doi: 10.1136/bmjopen-2020-038531 (PMC7511617; doi:10.1136/bmjopen-2020-038531), 2020-09-18
Supplement: bmjopen-2020-038531.draft_revisions.pdf [file bmjopen-2020-038531.draft_revisions.pdf]

# BMJ Open

BMJ Open is committed to open peer review. As part of this commitment we make the peer review history of every article we publish publicly available.

When an article is published we post the peer reviewers' comments and the authors' responses online. We also post the versions of the paper that were used during peer review. These are the versions that the peer review comments apply to.

The versions of the paper that follow are the versions that were submitted during the peer review process. They are not the versions of record or the final published versions. They should not be cited or distributed as the published version of this manuscript.

BMJ Open is an open access journal and the full, final, typeset and author-corrected version of record of the manuscript is available on our site with no access controls, subscription charges or pay-per-view fees (<http://bmjopen.bmj.com>).

If you have any questions on BMJ Open's open peer review process please email [info.bmjopen@bmj.com](mailto:info.bmjopen@bmj.com)

# BMJ Open

## Cohort profile: The comprehensive cervical cancer prevention in Tanzania (CONCEPT) study

|                               |                                                                                                                                                                                                                                                                                                                                                                                                                                                                                                                                                                                                                                                                                                                                                                                                                                                                                                                                                                                                                                                                                                                                                                    |
|-------------------------------|--------------------------------------------------------------------------------------------------------------------------------------------------------------------------------------------------------------------------------------------------------------------------------------------------------------------------------------------------------------------------------------------------------------------------------------------------------------------------------------------------------------------------------------------------------------------------------------------------------------------------------------------------------------------------------------------------------------------------------------------------------------------------------------------------------------------------------------------------------------------------------------------------------------------------------------------------------------------------------------------------------------------------------------------------------------------------------------------------------------------------------------------------------------------|
| Journal:                      | <i>BMJ Open</i>                                                                                                                                                                                                                                                                                                                                                                                                                                                                                                                                                                                                                                                                                                                                                                                                                                                                                                                                                                                                                                                                                                                                                    |
| Manuscript ID                 | bmjopen-2020-038531                                                                                                                                                                                                                                                                                                                                                                                                                                                                                                                                                                                                                                                                                                                                                                                                                                                                                                                                                                                                                                                                                                                                                |
| Article Type:                 | Cohort profile                                                                                                                                                                                                                                                                                                                                                                                                                                                                                                                                                                                                                                                                                                                                                                                                                                                                                                                                                                                                                                                                                                                                                     |
| Date Submitted by the Author: | 13-Mar-2020                                                                                                                                                                                                                                                                                                                                                                                                                                                                                                                                                                                                                                                                                                                                                                                                                                                                                                                                                                                                                                                                                                                                                        |
| Complete List of Authors:     | Mchome, Bariki; Kilimanjaro Christian Medical Centre, Department of Obstetrics and Gynaecology<br>Swai, Patricia; Kilimanjaro Christian Medical Centre, Department of Obstetrics and Gynaecology<br>Wu, Chunsen; University of Southern Denmark, Department of Clinical Research; Odense Universitetshospital, Obstetrics and Gynaecology<br>Katanga, Johnson; Ocean Road Cancer Institute, Department for Cancer Prevention Services<br>Kahesa, C; Ocean Road Cancer Institute, Department for Cancer Prevention Services<br>Manongi, Rachel; Kilimanjaro Christian Medical College, Institute of Public Health<br>Mwaiselage, Julius; Ocean Road Cancer Institute, Department for Cancer Prevention Services<br>Kjaer, Susanne; Danish Cancer Society Research Center, Department of Virus, Lifestyle and Genes; Copenhagen University Hospital, Department of Gynaecology<br>Rasch, Vibeke; University of Southern Denmark, Department of Clinical Research; Odense Universitetshospital, Obstetrics and Gynaecology<br>Linde, Ditte ; University of Southern Denmark, Department of Clinical Research; Odense Universitetshospital, Obstetrics and Gynaecology |
| Keywords:                     | Gynaecological oncology < GYNAECOLOGY, Gynaecological oncology < ONCOLOGY, PREVENTIVE MEDICINE, REPRODUCTIVE MEDICINE, International health services < HEALTH SERVICES ADMINISTRATION & MANAGEMENT, HIV & AIDS < INFECTIOUS DISEASES                                                                                                                                                                                                                                                                                                                                                                                                                                                                                                                                                                                                                                                                                                                                                                                                                                                                                                                               |
|                               |                                                                                                                                                                                                                                                                                                                                                                                                                                                                                                                                                                                                                                                                                                                                                                                                                                                                                                                                                                                                                                                                                                                                                                    |

SCHOLARONE™  
Manuscripts

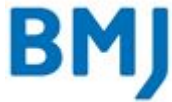

I, the Submitting Author has the right to grant and does grant on behalf of all authors of the Work (as defined in the below author licence), an exclusive licence and/or a non-exclusive licence for contributions from authors who are: i) UK Crown employees; ii) where BMJ has agreed a CC-BY licence shall apply, and/or iii) in accordance with the terms applicable for US Federal Government officers or employees acting as part of their official duties; on a worldwide, perpetual, irrevocable, royalty-free basis to BMJ Publishing Group Ltd ("BMJ") its licensees and where the relevant Journal is co-owned by BMJ to the co-owners of the Journal, to publish the Work in this journal and any other BMJ products and to exploit all rights, as set out in our [licence](#).

The Submitting Author accepts and understands that any supply made under these terms is made by BMJ to the Submitting Author unless you are acting as an employee on behalf of your employer or a postgraduate student of an affiliated institution which is paying any applicable article publishing charge ("APC") for Open Access articles. Where the Submitting Author wishes to make the Work available on an Open Access basis (and intends to pay the relevant APC), the terms of reuse of such Open Access shall be governed by a Creative Commons licence – details of these licences and which [Creative Commons](#) licence will apply to this Work are set out in our licence referred to above.

Other than as permitted in any relevant BMJ Author's Self Archiving Policies, I confirm this Work has not been accepted for publication elsewhere, is not being considered for publication elsewhere and does not duplicate material already published. I confirm all authors consent to publication of this Work and authorise the granting of this licence.

# Cohort profile: The comprehensive cervical cancer prevention in Tanzania (CONCEPT) study

## Authors

Bariki Mchome<sup>a</sup>, Patricia Swai<sup>a</sup>, Chunsen Wu<sup>b,c</sup>, Johnson Katanga<sup>d</sup>, Crispin Kahesa<sup>d</sup>, Rachel Manongi<sup>e</sup>, Julius Mwaiselage<sup>d</sup>, Susanne K. Kjaer<sup>f,g</sup>, Vibeke Rasch<sup>b,c</sup>, Ditte S. Linde<sup>b,c,h\*</sup>

<sup>a</sup>Department of Obstetrics and Gynaecology, Kilimanjaro Christian Medical Centre, Moshi, Tanzania.

Email: barikimchome@gmail.com; patriciaswai@yahoo.com

<sup>b</sup>Department of Clinical Research, University of Southern Denmark, Odense, Denmark. Email:

dsondergaard@health.sdu.dk; vrasch@health.sdu.dk

<sup>c</sup>Department of Obstetrics and Gynaecology, Odense University Hospital, Odense, Denmark. Email:

Chunsen.Wu@rsyd.dk

<sup>d</sup>Department for Cancer Prevention Services, Ocean Road Cancer Institute, Dar es Salaam, Tanzania. Email:

johnsonkatanga2013@gmail.com; crispinkahesa@yahoo.co.uk; jmwaiselage@yahoo.com

<sup>e</sup>Institute of Public Health, Kilimanjaro Christian Medical University College, Moshi, Tanzania. Email:

naeraheli@gmail.com

<sup>f</sup>Department of Virus, Lifestyle and Genes, Danish Cancer Society Research Center, Copenhagen, Denmark.

Email: susanne@cancer.dk

<sup>g</sup>Department of Gynaecology, Rigshospitalet University Hospital, Copenhagen, Denmark

<sup>h</sup>OPEN, Odense Patient Data Explorative Network, Odense University Hospital, Odense, Denmark

\*Corresponding author: Ditte S. Linde, Department of Clinical Research, University of Southern Denmark,

Denmark. Email: dsondergaard@health.sdu.dk

Word count: 3031

1  
2  
3  
4  
5  
6  
7  
8  
9  
10  
11  
12  
13  
14  
15  
16  
17  
18  
19  
20  
21  
22  
23  
24  
25  
26  
27  
28  
29  
30  
31  
32  
33  
34  
35  
36  
37  
38  
39  
40  
41  
42  
43  
44  
45  
46  
47  
48  
49  
50  
51  
52  
53  
54  
55  
56  
57  
58  
59  
60

## 26 **Abstract**

### 27 **Purpose**

28 Cervical cancer is the cancer disease most women die from in Eastern Africa. To address the major burden of  
29 disease, the Comprehensive Cervical Cancer Project in Tanzania (CONCEPT) study was established in 2015,  
30 which involves the establishment of a prospective cohort. The cohort aims to investigate the natural history  
31 of HPV and cervical cancer in Tanzania and determine acquisition and persistence patterns of high-risk  
32 HPV– both type-specific and general – among HIV-positive and -negative women. Further, the influence of  
33 lifestyle and sexual/reproductive factors will be investigated.

### 35 **Participants**

36 Women aged 25-60 years were enrolled from cervical cancer screening clinics in Dar es Salaam and Moshi  
37 in Tanzania. Data were collected at baseline, at 14 months (1<sup>st</sup> follow-up) and at 28 months (2<sup>nd</sup> follow-up).  
38 Biological samples include cervical swabs for rapid HPV DNA-testing, cytology, Hybrid Capture 2, HPV-  
39 genotyping, and blood samples for HIV. Visual assessments included visual inspection with acetic acid and  
40 anthropometric measures included height and weight. Socio-demographic, lifestyle, reproductive, and sexual  
41 characteristics were collected by use of a standardised questionnaire.

### 43 **Findings to date**

44 4080 women were enrolled from august 2015 to May 2017. At baseline, 696 (17.2%) women were high-risk  
45 HPV-positive and among these 31.6% were HIV-positive. Further, 139 women (3.4%) had high grade  
46 squamous intraepithelial lesions. 3074 women (81%) attended the 1<sup>st</sup> follow-up. The majority attended after  
47 receiving a phone call reminder (35%) or participated from home via self-samples (41%). At 1<sup>st</sup> follow-up,  
48 438 (14.4%) were high-risk HPV-positive and 30.4% of these were HIV-positive.

## 50 **Future plans**

51 We plan to integrate our data with a previous cross-sectional HPV study conducted in Tanzania to the  
52 increase power in our findings. Researchers interested in collaborating within this discipline are welcomed.  
53 This may involve extracting data from the project or jointly requesting further investigation from the cohort.

## 55 **Registration**

56 ClinicalTrials.gov: NCT02509702 (CONCEPT sub-study).

## 58 **Strengths and limitations of this study**

- 59 • This is a large-scale longitudinal cervical cancer study conducted in an HIV endemic population that  
60 aims to address a major cause of disease among East-African women, which so far has not received  
61 much focus within global health research.
- 62 • Women are followed over a long duration of time and with a large amount of data being collected by  
63 use of questionnaires and lab tests.
- 64 • It was difficult to get women to return for follow-up screenings. However, carefully designed tracing  
65 plans and dedicated home-visiting staff entailed that we managed to attain an 81% participation rate  
66 at 1<sup>st</sup> follow-up.
- 67 • Detailed HIV documentation was challenging to obtain, which has limited our ability and power in  
68 analyses involving HIV immunologic markers and treatment.

## 71 **Introduction**

72 Cervical cancer is a major cause of cancer-related mortality and morbidity globally, despite the disease being  
73 preventable. The highest prevalence is found among women aged 45-60 years[1], and the burden of disease

1  
2  
3  
4 74 is disproportionally distributed among low- and middle-income countries (LMIC) and high-income countries  
5  
6 75 (HIC) – LMICs account for 80% of cervical cancer cases worldwide. The global age-standardised incidence  
7  
8 76 rate for cervical cancer is 14 per 100,000 women[2] while the incidence rate of cervical cancer is 42.7 per  
9  
10 77 100,000 women in East Africa[3] and 54 per 100,000 women in Tanzania, specifically[4]. Major causes of  
11  
12 78 the high burden of disease in resource-limited settings include unavailability of organised screening  
13  
14 79 programmes; use of visual inspection with acetic acid (VIA) as standard screening method, which has shown  
15  
16 80 to have low sensitivity[5, 6]; and low awareness of the disease and how to prevent it[7]. Further, there is  
17  
18 81 limited longitudinal regional data of the natural history of the disease and the associated risk factors in these  
19  
20 82 areas.  
21  
22  
23 83

24  
25 84 The aetiology of cervical cancer is multifactorial, however, persistent infection with a high-risk (HR) type of  
26  
27 85 human papillomavirus (HPV) is a necessary cause for the disease. HPV is the most common sexually  
28  
29 86 transmitted infection worldwide, and most sexually active individuals will acquire an HPV infection at some  
30  
31 87 point in their lives[8]. Eighty to 90% of HPV infections clear spontaneously, however, 10-20% become  
32  
33 88 persistent and can develop into pre-cancerous lesions and cervical cancer over time. There are different  
34  
35 89 factors associated with HPV persistence, the two most significant ones are the type of HPV involved and  
36  
37 90 immunodeficiency, hence HIV-positive women have increased risk of acquiring HPV[9] and for the  
38  
39 91 infection to become persistent[10, 11]. HPV16 and 18 are the two most important types as these are  
40  
41 92 associated with approximately 70% of all invasive cervical cancers worldwide[8]. Globally, the five most  
42  
43 93 common types are HPV 16, 18, 52, 31, and 58[5, 6]. However, cross-sectional studies from Africa and  
44  
45 94 systematic reviews on the global HPV burden indicate that the type-specific prevalence of HPV differs in  
46  
47 95 Africa compared to other regions[2, 12, 13]. Further, sexual, reproductive, and lifestyle factors influence  
48  
49 96 HPV acquisition and persistence, including smoking, high parity, number of sexual partners, long-term use  
50  
51 97 of oral contraceptives, and co-infections with other sexually transmitted agents[14, 15]. However to date,  
52  
53 98 there are no adequately powered longitudinal HPV studies among middle-aged women in East Africa that  
54  
55 99 explore the association of HIV, immunological factors, reproductive, and lifestyle factors on HR HPV  
56  
57 100 acquisition and persistence.  
58  
59  
60

1  
2  
3  
4  
5  
6  
7  
8  
9  
10  
11  
12  
13  
14  
15  
16  
17  
18  
19  
20  
21  
22  
23  
24  
25  
26  
27  
28  
29  
30  
31  
32  
33  
34  
35  
36  
37  
38  
39  
40  
41  
42  
43  
44  
45  
46  
47  
48  
49  
50  
51  
52  
53  
54  
55  
56  
57  
58  
59  
60

101

To our knowledge, only two HPV cohort studies and one large HPV cross-sectional study have been conducted in Africa, which explore the dynamics of HPV, HIV, and cervical cancer, namely (1) the HPV in Africa Research Partnership (HARP) HPV Study in Burkina Faso and Tanzania[16]; (2) the African Collaborative Center for Microbiome and Genomics Research (ACCME) study in Nigeria[17]; and (3) the Prevention of Cervical Cancer in Tanzania (PROTECT) study[18]. Other studies are nested in HPV vaccine trials[19-21]. These studies have provided some insight into the distribution of HPV among different African populations, however, they were either cross-sectional or conducted among adolescents' with inadequately powered HIV-positive women and a shorter duration of follow-up.

110

Initiatives to overcome cervical cancer in East Africa – and in Tanzania specifically – needs to be multifaceted and driven by evidence that accounts for the local factors that influence the burden of disease. Therefore, the Comprehensive Cervical Cancer Prevention in Tanzania (CONCEPT) study was launched in 2015 with an overall aim of improving prevention of cervical cancer in Tanzania (S1 Appendix). The CONCEPT study is an international collaborative study between Ocean Road Cancer Institute (ORCI), Kilimanjaro Christian Medical Centre (KCMC), University of Southern Denmark, and the Danish Cancer Society Research Center, and is to finish in December 2020. The CONCEPT study has several specific objectives that each focuses on different elements that are important in addressing the burden of cervical cancer, e.g. the (1) the natural history of HPV and how associated factors influence HR HPV occurrence, acquisition and persistence; (2) acceptability of an upcoming screening method for resource-limited settings, namely rapid HPV DNA testing[22] and how it performs compared to Hybrid Capture2 (HC2) and VIA for detection of cytologically diagnosed high-grade cervical lesions or cancer[6]; (3) how to ensure follow-up of HPV-positive women[23], and what motivates or prevents these women from returning to follow-up examinations[24, 25]. Introduction of HPV DNA testing in LMIC is challenging due to logistical problems inherent in these settings, however, HPV-based primary screening is a key method in future screening programmes across the world[26], and for it to be effectively established in resource-limited settings, local specific evidence is warranted. Therefore, in order to understand the natural history of HPV and cervical



1  
2  
3  
4 128 neoplasia and specifically determine acquisition and persistence patterns of HR HPV– both type-specific  
5  
6 129 and general – among HIV-positive and -negative women, a cohort of women with statistically adequate  
7  
8 130 number of HIV-positives was established as part of the CONCEPT study. The aim of this article is to  
9  
10 131 describe how this cohort was established and followed up, the profile of the cohort, and provide some  
11  
12 132 characteristics of the cohort at enrolment and at the 1<sup>st</sup> follow-up.  
13  
14  
15 133

## 17 134 **Cohort description**

### 21 135 **Study design and study population**

23 136 Women were enrolled from cervical cancer screening clinics at three study sites; (1) ORCI in Dar-es-Salaam  
24  
25 137 as well as (2) KCMC and (3) Mawenzi regional referral hospital in the Kilimanjaro region. In Dar-es-  
26  
27 138 Salaam, women from Ilala, Temeke, and Mwananyamala district were included while in the Kilimanjaro  
28  
29 139 region, women originating from the urban and rural district of Moshi – including Hai and Rombo – were  
30  
31 140 included. Originally, the study was designed as a double-site study (KCMC/ORCI), however, due to a  
32  
33 141 slower-than-anticipated recruitment rate, a third study site (Mawenzi) was added six months into the  
34  
35 142 enrolment period.  
36  
37 143

40 144 Women were eligible for inclusion if they were 25-60 years and attended a patient-initiated routine cervical  
41  
42 145 cancer screening at one of the study sites. Women were excluded if they were pregnant, on their menstrual  
43  
44 146 period, had a history of premalignant lesions of the cervix within the last 12 months, had previously been  
45  
46 147 diagnosed with cervical cancer or had undergone abdominal hysterectomy. Following a detailed explanation  
47  
48 148 of the study, all participants provided written informed consent. Fingerprints were used for illiterate  
49  
50 149 participants. The CONCEPT study was approved by the Ethical Committee of the Tanzanian National  
51  
52 150 Institute of Medical Research (NIMR/HQ/R.8a/Vol.IX/1955), and is reported according to the  
53  
54 151 STrengthening the Reporting of OBServational studies in Epidemiology (STROBE) statement (S2  
55  
56 152 Appendix).  
57  
58  
59  
60

1  
2  
3  
4  
5  
6  
7  
8  
9  
10  
11  
12  
13  
14  
15  
16  
17  
18  
19  
20  
21  
22  
23  
24  
25  
26  
27  
28  
29  
30  
31  
32  
33  
34  
35  
36  
37  
38  
39  
40  
41  
42  
43  
44  
45  
46  
47  
48  
49  
50  
51  
52  
53  
54  
55  
56  
57  
58  
59  
60

153

Data were collected during the enrolment visit, at 14 months (1<sup>st</sup> follow-up), and at 28 months (2<sup>nd</sup> follow-up, ongoing). Healthcare providers working at the screening clinics enrolled participants and collected data following protocols developed specifically for the project. At inclusion, all participants were given a 14-months follow-up appointment written on an appointment card. If the women did not attend their follow-up visit within one month of their appointment, an active follow-up procedure was initiated. Firstly, non-attendees were contacted by phone and encouraged to attend (tracing method I). If the woman did not show up within two weeks of the phone call, the women had a home-visit by an outreach nurse who encouraged her to attend (tracing method II). If the woman still did not attend and consented to it, an outreach nurse visited her again and conducted the follow-up visit at home (tracing method III). Women, who participated in the first follow-up were appointed a second follow-up visit 28 months after initial recruitment. If the woman did not attend the 2<sup>nd</sup> follow-up, tracing method I and III were re-initiated.

165

## Assessment of exposure

At inclusion, socio-demographic, lifestyle, reproductive, and sexual characteristics were collected during a personal interview using a modified version of a standardised questionnaire adopted from a previous study conducted in Tanzania[27] (S3 appendix). The questionnaire was hardcopy, developed in English while the interview was conducted in Kiswahili with direct translation. A Kiswahili version of the questionnaire was available to guide the interviewers. A detailed contact information form was filled out at enrolment and updated at follow-up. Participants were screened by trained healthcare providers according to the standard national cervical cancer screening prevention programme in Tanzania[28]. This entails a cost-free gynaecological examination with VIA, HIV-testing and HIV-counselling. Venous blood from the index finger was tested by use of a quick HIV-1/2 test (www.alere.com), and a supplementary quick HIV-1/2 test (Abbott Laboratories) was performed as confirmatory for positive results. Discordant results were further confirmed using Unigold (Trinity Biotech). Women who screened VIA-positive or were suspected of manifest cancer were managed on-site based on the National Cervical Cancer Service Delivery Guidelines.

1  
2  
3  
4 179 This included treatment with cryotherapy or loop electrosurgical excision procedure (LEEP) for VIA-  
5  
6 180 positives, and punch biopsy and referral for treatment at the oncology clinic at ORCI for cancer  
7  
8 181 suspicions[28]. Further, weight and height were measured and registered on a hard-copy registration sheet  
9  
10 182 together with the HIV- and VIA-result (Table 1).  
11  
12  
13 183  
14

15 184 **Table 1. Overview of data collected in the CONCEPT cohort**

| Baseline<br>17 Aug 2015 – 6 Jul 2017 | Measurements                                                                                                                                          | Instrument                                                                                                                                                                          | Storage and analysis                                                                                                                                                                                                                                                                                                                                                                                                                                                                                                                                                                               |
|--------------------------------------|-------------------------------------------------------------------------------------------------------------------------------------------------------|-------------------------------------------------------------------------------------------------------------------------------------------------------------------------------------|----------------------------------------------------------------------------------------------------------------------------------------------------------------------------------------------------------------------------------------------------------------------------------------------------------------------------------------------------------------------------------------------------------------------------------------------------------------------------------------------------------------------------------------------------------------------------------------------------|
|                                      | <b>Biological samples</b><br>Provider-collected cervical swab for:<br>• Rapid <i>careHPV</i> ® DNA-testing                                            | <ul style="list-style-type: none"> <li>• Aryes spatula</li> <li>• Kept in <i>careHPV</i> collection medium</li> </ul>                                                               | <ul style="list-style-type: none"> <li>• Samples stored on-site in laboratories at room temperature</li> <li>• When 90 samples were available they were processed on-site on a <i>careHPV</i> machine</li> <li>• Results registered on <i>careHPV</i> sheet and stored on-site</li> </ul>                                                                                                                                                                                                                                                                                                          |
|                                      | Provider-collected cervical swab for:<br>• Cytology<br>• HC2<br>• Genotyping                                                                          | <ul style="list-style-type: none"> <li>• ThinPrep® Pap Test plastic spatula</li> <li>• Kept in PreServCyt solution</li> </ul>                                                       | <ul style="list-style-type: none"> <li>• Samples stored on-site in laboratories at room temperature until enrolment had finished</li> <li>• Then the samples were sent to the Pathology Department at Lillebaelt Hospital, Denmark and processed on the ThinPrep5000 Autoloader Instrument, Hologic® for cytology</li> <li>• Remaining material of the samples were sent to the Section for Experimental Virology, Tübingen University, Germany and underwent HC2 DNA testing and genotyping using LiPaExtra</li> <li>• Cytology and HC2 and genotype results were sent to OUH, Denmark</li> </ul> |
|                                      | Venous blood from index finger for:<br>• HIV-test                                                                                                     | <ul style="list-style-type: none"> <li>• Quick HIV-1/2 test</li> </ul>                                                                                                              | <ul style="list-style-type: none"> <li>• Immediate results registered on registration form and stored on-site</li> </ul>                                                                                                                                                                                                                                                                                                                                                                                                                                                                           |
|                                      | <b>Visual assessment</b><br>• VIA                                                                                                                     | <ul style="list-style-type: none"> <li>• Acetic acid applied to cervix and abnormal tissue temporarily appears white</li> </ul>                                                     | <ul style="list-style-type: none"> <li>• Immediate results registered on registration form and stored on-site</li> </ul>                                                                                                                                                                                                                                                                                                                                                                                                                                                                           |
|                                      | <b>Anthropometric measures</b><br>• Weight<br>• Height                                                                                                | <ul style="list-style-type: none"> <li>• Scale and altitude meter</li> </ul>                                                                                                        | <ul style="list-style-type: none"> <li>• Immediate results registered on registration form and stored on-site</li> </ul>                                                                                                                                                                                                                                                                                                                                                                                                                                                                           |
|                                      | <b>Personal interview</b><br>• Socio-demographic factors<br>• HIV treatment and CD4 count<br>• Lifestyle factors<br>• Sexual and reproductive factors | <ul style="list-style-type: none"> <li>• Structured questionnaire</li> </ul>                                                                                                        | <ul style="list-style-type: none"> <li>• Interviewed by nurse and stored on-site</li> </ul>                                                                                                                                                                                                                                                                                                                                                                                                                                                                                                        |
| 14 - m                               | <b>Biological samples</b><br>Provider-collected cervical swab <i>or</i> self-collected swab for:<br>• HC2<br>• Genotyping                             | <ul style="list-style-type: none"> <li>• ThinPrep® Pap Test plastic spatula (provider-based)</li> <li>• Evalyn® brush (self-swab)</li> <li>• Kept in PreServCyt solution</li> </ul> | <ul style="list-style-type: none"> <li>• Self-swabs were conducted in the women's home (cf. tracing method III) and transferred to the study sites where they were stored with ThinPrep samples similarly to baseline until 1<sup>st</sup> follow-up had finished</li> <li>• Then the samples were sent to the</li> </ul>                                                                                                                                                                                                                                                                          |

|                                                                  |                                                                                   |                                                                               |                                                                                                                              |
|------------------------------------------------------------------|-----------------------------------------------------------------------------------|-------------------------------------------------------------------------------|------------------------------------------------------------------------------------------------------------------------------|
|                                                                  |                                                                                   |                                                                               | Section for Experimental Virology, Tübingen University, Germany and underwent HC2 DNA testing and genotyping using LiPaExtra |
|                                                                  | Venous blood from index finger for:                                               | • Quick HIV-1/2 test                                                          | • HC2 and genotype results were sent to OUH, Denmark                                                                         |
|                                                                  | • HIV-test (if negative at baseline)                                              |                                                                               | • Immediate results registered on registration form and stored on-site                                                       |
|                                                                  | <b>Visual assessment</b>                                                          | • Acetic acid applied to cervix and abnormal tissue temporarily appears white | • HIV-test was not conducted on women who participated from home (cf. tracing method III)                                    |
|                                                                  | • VIA                                                                             |                                                                               | • Immediate results registered on registration form and stored on-site                                                       |
|                                                                  | <b>Personal interview</b>                                                         | • Structured questionnaire                                                    | • Not conducted on women who participated from home (cf. tracing method III)                                                 |
|                                                                  | • HIV treatment and CD4 count                                                     |                                                                               | • Interviewed by nurse at clinic or at home and stored on-site                                                               |
|                                                                  | • Sexual factors                                                                  |                                                                               |                                                                                                                              |
| w<br>u<br>n<br>28-months follow-up (2 <sup>nd</sup> )<br>Ongoing | <b>Biological samples</b>                                                         | • ThinPrep® Pap Test plastic spatula (provider-based)                         | • Same procedure as in 1 <sup>st</sup> follow-up                                                                             |
|                                                                  | Provider-collected cervical swab <i>or</i> self-swab only for HPV-positive women: | • Evalyn® brush (self-swab)                                                   |                                                                                                                              |
|                                                                  | • HC2                                                                             | • Kept in PreServCyt solution                                                 |                                                                                                                              |
|                                                                  | • Genotyping                                                                      |                                                                               |                                                                                                                              |
|                                                                  | Venous blood from index finger for:                                               | • Quick HIV-1/2 test                                                          | • Same procedure as in 1 <sup>st</sup> follow-up                                                                             |
| • HIV-test (if negative at 1 <sup>st</sup> follow-up)            |                                                                                   |                                                                               |                                                                                                                              |
| <b>Visual assessment</b>                                         | • Acetic acid applied to cervix and abnormal tissue temporarily appears white     | • Same procedure as in 1 <sup>st</sup> follow-up                              |                                                                                                                              |
| • VIA                                                            |                                                                                   |                                                                               |                                                                                                                              |
| <b>Personal interview</b>                                        | • Structured questionnaire                                                        | • Same procedure as in 1 <sup>st</sup> follow-up                              |                                                                                                                              |
| • HIV treatment and CD4 count                                    |                                                                                   |                                                                               |                                                                                                                              |
| • Sexual factors                                                 |                                                                                   |                                                                               |                                                                                                                              |

185  
186 Prior to the routine VIA examination, cervical swabs were taken using (1) an Aryes spatula for rapid  
187 *careHPV* test (www.qiagen.com), and (2) a ThinPrep® Pap Test Plastic Spatula for liquid-based cytology,  
188 HPV DNA testing and genotyping by use of Hybrid Capture2 (HC2) and LiPaExtra (Innogenetics, Gent,  
189 Belgium). The cervical samples for *careHPV* analysis were kept in a *careHPV* collection medium and stored  
190 at room temperature (max 25°C) in laboratories at ORCI or KCMC. Once 90 samples had been collected,  
191 they were analysed for HR HPV using a *careHPV* machine. A test was considered positive if one or more of

1  
2  
3  
4 192 the following 13 HR HPV types were detected: HPV16, 18, 31, 33, 35, 39, 45, 51, 52, 56, 58, 59, 68. The  
5  
6 193 results were registered on a *careHPV* results sheet (Table 1).  
7  
8 194  
9  
10 195 The samples for HC2 testing and cytology were kept in a PreServCyt solution (Hologic, Inc. 250 Campus  
11  
12 196 Drive Marlborough, MA 01752 USA) and stored at room temperature in laboratories at ORCI and KCMC.  
13  
14 197 Once enrolment had finished, the PreServCyt vials were sent to the Department of Pathology at Lillebaelt  
15  
16 198 Hospital, Vejle, Denmark and processed at the ThinPrep5000 Autoloader Instrument, Hologic® according to  
17  
18 199 manufactures instruction and stained with ThinPrep Stain®. The slides were scanned by the Thin Prep  
19  
20 200 Imaging System® with selection of 22 Fields of view which was reviewed by cytotechnologist in review  
21  
22 201 scopes. The specimens were evaluated for adequacy and for abnormal cells. If abnormal cells were detected,  
23  
24 202 the slides were consulted with a gynae-pathologist who made the final diagnosis. The specimens were  
25  
26 203 diagnosed according to the Bethesda Nomenclature for System for Cervical Cytology 2014[29] into  
27  
28 204 following categories: Negative for intra epithelial lesion (NILM), Atypical Squamous Cell of Undetermined  
29  
30 205 Significance (ASCUS), Atypical Squamous Cell in which High grade squamous intraepithelial lesion cannot  
31  
32 206 be excluded (ASCH), Low grade Squamous Intraepithelial Lesion (LSIL), High grade Squamous  
33  
34 207 Intraepithelial Lesion (HSIL), Atypical Glandular Cell (AGC), Adenocarcinoma In Situ(AIS), and  
35  
36 208 Adenocarcinoma. The remaining material of the PreServCyt vials were sent to the Section for Experimental  
37  
38 209 Virology, Tübingen University, Germany for HPV DNA testing and genotyping. HPV DNA testing was  
39  
40 210 done using HC2 DNA test (www.qiagen.com) with a high-risk cocktail probe. A test was considered positive  
41  
42 211 if one or more of the following 13 HR HPV types were found: HPV 16, 18, 31, 33, 35, 39, 45, 51, 52, 56, 58,  
43  
44 212 59, 68. A threshold of 1.0pg HPVDNA/ml, which corresponds to 1.0 relative light unit coefficient, was used,  
45  
46 213 as recommended by United States Food and Drug Authority. HPV-positive samples were genotyped using  
47  
48 214 LiPaExtra, which can detect 28 HPV types, 18 HR risk types (HPV 16, 18, 26, 31, 33, 35, 39, 45, 51, 52, 53,  
49  
50 215 56, 58, 59, 66, 68, 73, 82) and 10 low risk types (HPV 6, 11, 40, 43, 44, 54, 69, 70, 71, 74)[30].  
51  
52  
53  
54  
55 216  
56  
57 217 **Outcome measures**  
58  
59  
60

1  
2  
3  
4 218 Women who attended their follow-up appointment at the screening clinics were HIV-tested (if negative at  
5  
6 219 baseline), had a cervical swab collected with a ThinPrep® Pap Test Plastic Spatula for HPV DNA testing by  
7  
8 220 use of HC2 and genotyping using LiPaExtra and underwent VIA (Table 1). Further, sexual and reproductive  
9  
10 221 characteristics were updated by use of a structured questionnaire (S4 Appendix). Women who did not attend  
11  
12 222 their follow-up appointment at the clinic but consented to having a home-visit appointment (cf. tracing  
13  
14 method III) responded to the questionnaire and had cervical specimens collected by use of an Evalyn self-  
15 223 sampling/self-swab device ([www.roversmedicaldevices.com](http://www.roversmedicaldevices.com)). The samples were transferred to laboratories  
16  
17 224 at ORCI and KCMC where they were kept in a PreServCyt solution and stored at room temperature.  
18  
19 225  
20  
21 226  
22

## 23 227 **Data management**

24  
25  
26 228 Questionnaires, registrations forms, contact forms, and *careHPV* result sheets were stored in different  
27  
28 229 cabinets in locked offices at KCMC and ORCI, after which they were double entered into EpiData by data  
29  
30 230 clerks. Together with lab results these data were sent to the Research unit for Gynaecology & Obstetrics,  
31  
32 231 Odense University Hospital (OUH), Odense, Denmark where they were merged and constructed into a  
33  
34 232 baseline database. Data with invalid IDs or no data registered were excluded upon creation of the database.  
35  
36 233 Similarly to baseline, follow-up data were sent to OUH after which it was merged with the baseline database.  
37  
38 234 Follow-up IDs that could not match a baseline ID were excluded.  
39  
40  
41 235  
42

## 43 236 **Patient and public involvement**

44  
45  
46 237 Study participants were not involved in the design or recruitment of the study.  
47  
48 238  
49

## 50 239 **Findings to date**

### 51 240 **Baseline findings**

52  
53  
54 241 A total of 4080 women were enrolled into the CONCEPT study. After inclusion, 37 study participants were  
55  
56 242 excluded leaving the total cohort to consist of 4043 women (fig 1). The baseline distribution of the socio-  
57  
58  
59  
60

1  
2  
3  
4 243 demographic is presented in Table 2. A total of 718 women (17.8%) were HIV-positive and the majority of  
5  
6 244 these were 35-39 years old (22.9%) while the majority of HIV-negative women were 40-44 years old  
7  
8 245 (19.2%). Among the HIV-positives, 49.7% were married (n=356) whilst 73.6% of HIV-negatives were  
9  
10 246 married (n=2434). Most of both HIV-positive (70.4%; n=504) and HIV-negative women (64.1%; n=2127)  
11  
12 247 had completed primary school. More HIV-negative women (87.0%; n=2879) reported to have had sex within  
13  
14 248 the last 12 months compared to HIV-positive women (72.7%; n=520), while more HIV-positives (26.2%)  
15  
16 249 than HIV-negatives (9.8%) reported to have had used condoms at every intercourse. In relation to number of  
17  
18 250 lifetime partners, 71.9% of HIV-positives reported having more than one lifetime partner whilst the  
19  
20 251 corresponding number for HIV-negative women was 61.0%. The CD4 count for HIV-positive women were  
21  
22 252 as follows: 8.6% (n=62) reported having a CD4 count  $\leq$ 199; 30.5% (n=219) had a CD4 ranging from 200-  
23  
24 253 499; and 48.9% (n=347) had a CD4 count  $\geq$ 500. Further, 12.5% (n=90) of the HIV-positives did not report  
25  
26 254 the CD4 count.  
27  
28  
29  
30 255

31  
32 256 **Table 2: Selected sociodemographic, lifestyle, sexual and reproductive characteristics of the cohort at**  
33  
34 257 **baseline and 1<sup>st</sup> follow-up stratified according to HIV-status**

|                        | COHORT PROFILE AT BASELINE |      |                              |      |                               |      | COHORT PROFILE AT 1 <sup>ST</sup> FOLLOW-UP |      |                               |      |                                |      |
|------------------------|----------------------------|------|------------------------------|------|-------------------------------|------|---------------------------------------------|------|-------------------------------|------|--------------------------------|------|
|                        | Total<br>(n=4043)          |      | HIV-positive<br>(n=718; 18%) |      | HIV-negative<br>(n=3325; 82%) |      | Total<br>(n=3074)                           |      | HIV-positive*<br>(n=552; 18%) |      | HIV-negative*<br>(n=2522; 82%) |      |
|                        | N                          | %    | N                            | %    | N                             | %    | N                                           | %    | N                             | %    | N                              | %    |
| <b>Age</b>             |                            |      |                              |      |                               |      |                                             |      |                               |      |                                |      |
| 25-29                  | 527                        | 13.0 | 43                           | 6.0  | 484                           | 14.6 | 344                                         | 11.2 | 26                            | 4.7  | 318                            | 12.6 |
| 30-34                  | 599                        | 14.8 | 78                           | 10.9 | 521                           | 15.7 | 432                                         | 14.1 | 61                            | 11.1 | 371                            | 14.7 |
| 35-39                  | 744                        | 18.4 | 164                          | 22.9 | 580                           | 17.5 | 547                                         | 17.8 | 121                           | 21.9 | 426                            | 16.9 |
| 40-44                  | 787                        | 19.5 | 149                          | 20.8 | 638                           | 19.2 | 634                                         | 20.6 | 115                           | 20.8 | 519                            | 20.6 |
| 45-49                  | 667                        | 16.5 | 138                          | 19.2 | 529                           | 15.9 | 522                                         | 17.0 | 112                           | 20.3 | 410                            | 16.7 |
| 50-60                  | 716                        | 17.7 | 145                          | 20.2 | 571                           | 17.2 | 595                                         | 19.4 | 117                           | 21.2 | 478                            | 18.9 |
| Missing                | 3                          | 0.1  | 1                            | 0.14 | 2                             | 0.06 | -                                           | -    | -                             | -    | -                              | -    |
| <b>Marital status</b>  |                            |      |                              |      |                               |      |                                             |      |                               |      |                                |      |
| Married                | 2790                       | 69.0 | 356                          | 49.7 | 2434                          | 73.6 | 2159                                        | 70.2 | 288                           | 52.2 | 1871                           | 74.2 |
| Cohabiting             | 58                         | 1.4  | 14                           | 2.0  | 44                            | 1.3  | 44                                          | 1.4  | 11                            | 2.0  | 33                             | 1.3  |
| Single                 | 487                        | 12.0 | 110                          | 15.4 | 377                           | 11.4 | 335                                         | 10.9 | 76                            | 13.8 | 259                            | 10.3 |
| Divorced/widow         | 687                        | 17.0 | 236                          | 33.0 | 451                           | 13.6 | 527                                         | 17.1 | 176                           | 31.9 | 351                            | 13.9 |
| Missing                | 21                         | 0.5  | 2                            | 0.28 | 19                            | 0.57 | 9                                           | 0.3  | 1                             | 0.2  | 8                              | 0.3  |
| <b>BMI</b>             |                            |      |                              |      |                               |      |                                             |      |                               |      |                                |      |
| Underweight            | 96                         | 2.4  | 27                           | 3.9  | 69                            | 2.1  | 73                                          | 2.4  | 21                            | 3.8  | 52                             | 2.1  |
| Normal                 | 1149                       | 28.4 | 269                          | 38.5 | 880                           | 27.3 | 839                                         | 27.3 | 199                           | 36.1 | 640                            | 25.4 |
| Overweight             | 2190                       | 54.2 | 334                          | 47.8 | 1856                          | 57.6 | 1695                                        | 55.1 | 259                           | 46.9 | 1436                           | 56.9 |
| Obese                  | 486                        | 12.0 | 69                           | 9.9  | 417                           | 12.9 | 406                                         | 13.2 | 59                            | 10.7 | 347                            | 13.8 |
| Missing                | 122                        | 3.0  | 19                           | 2.15 | 103                           | 3.1  | 61                                          | 2.0  | 14                            | 2.5  | 47                             | 1.9  |
| <b>Education level</b> |                            |      |                              |      |                               |      |                                             |      |                               |      |                                |      |

|                                         |      |      |     |      |      |      |      |      |     |      |      |      |
|-----------------------------------------|------|------|-----|------|------|------|------|------|-----|------|------|------|
| No formal education                     | 126  | 3.1  | 32  | 4.5  | 94   | 2.8  | 89   | 2.9  | 23  | 4.2  | 66   | 2.6  |
| Primary                                 | 2631 | 65.1 | 504 | 70.4 | 2127 | 64.1 | 2027 | 65.9 | 381 | 69.0 | 2027 | 65.3 |
| Secondary                               | 882  | 21.8 | 146 | 20.4 | 736  | 22.2 | 672  | 21.9 | 123 | 22.3 | 672  | 21.8 |
| College                                 | 396  | 9.8  | 34  | 4.7  | 362  | 10.9 | 280  | 9.1  | 23  | 4.2  | 280  | 10.2 |
| Missing                                 | 8    | 0.2  | 2   | 0.28 | 6    | 0.18 | 6    | 0.2  | 2   | 0.4  | 6    | 0.7  |
| <b>Religion</b>                         |      |      |     |      |      |      |      |      |     |      |      |      |
| Christian                               | 2708 | 67.0 | 505 | 70.6 | 2203 | 66.8 | 2064 | 67.1 | 391 | 70.8 | 1673 | 66.3 |
| Muslim                                  | 1289 | 31.9 | 206 | 28.8 | 1083 | 32.8 | 978  | 31.8 | 155 | 28.1 | 823  | 32.6 |
| Other                                   | 16   | 0.4  | 4   | 0.6  | 12   | 0.4  | 13   | 0.4  | 4   | 0.7  | 9    | 0.4  |
| Missing                                 | 30   | 0.7  | 3   | 0.42 | 27   | 0.81 | 19   | 0.6  | 2   | 0.7  | 17   | 0.6  |
| <b>No of living children</b>            |      |      |     |      |      |      |      |      |     |      |      |      |
| 0                                       | 35   | 0.9  | 5   | 0.7  | 30   | 0.9  | 22   | 0.7  | 4   | 0.7  | 18   | 0.7  |
| 1-2                                     | 1506 | 37.2 | 295 | 41.8 | 1211 | 37.5 | 1112 | 36.2 | 219 | 39.7 | 893  | 35.4 |
| 3                                       | 901  | 22.3 | 180 | 25.5 | 721  | 22.3 | 729  | 23.7 | 141 | 25.5 | 588  | 23.2 |
| 4-6                                     | 1135 | 28.1 | 183 | 25.9 | 952  | 29.5 | 900  | 29.3 | 150 | 27.2 | 750  | 29.7 |
| >7                                      | 139  | 3.4  | 19  | 2.7  | 120  | 3.7  | 99   | 3.2  | 12  | 2.2  | 87   | 3.5  |
| Never been pregnant                     | 221  | 5.5  | 24  | 3.4  | 197  | 6.1  | 144  | 4.7  | 16  | 2.9  | 128  | 5.1  |
| Missing                                 | 106  | 2.6  | 12  | 1.67 | 94   | 2.83 | 68   | 2.2  | 10  | 1.8  | 58   | 2.3  |
| <b>Years living with partner</b>        |      |      |     |      |      |      |      |      |     |      |      |      |
| 0-1                                     | 166  | 4.1  | 21  | 3.0  | 145  | 4.4  | 102  | 3.3  | 18  | 3.3  | 84   | 3.3  |
| 2-4                                     | 517  | 12.8 | 112 | 15.9 | 405  | 12.4 | 355  | 11.6 | 74  | 13.4 | 281  | 11.4 |
| 5-9                                     | 723  | 17.9 | 143 | 20.3 | 580  | 17.8 | 515  | 16.8 | 106 | 19.2 | 409  | 16.2 |
| 10-14                                   | 648  | 16.0 | 125 | 17.7 | 523  | 16.0 | 502  | 16.3 | 97  | 17.6 | 405  | 16.1 |
| 15-19                                   | 546  | 13.5 | 104 | 14.8 | 442  | 13.6 | 443  | 14.4 | 85  | 15.4 | 358  | 14.2 |
| >20                                     | 1203 | 29.8 | 162 | 23.0 | 1041 | 31.9 | 993  | 32.2 | 137 | 24.8 | 856  | 33.9 |
| Single with no regular partner          | 163  | 4.0  | 38  | 5.4  | 125  | 3.8  | 118  | 3.8  | 27  | 4.9  | 91   | 3.6  |
| Missing                                 | 77   | 1.9  | 13  | 1.81 | 64   | 1.92 | 46   | 1.5  | 8   | 1.5  | 38   | 1.5  |
| <b>Sex in last 1 year</b>               |      |      |     |      |      |      |      |      |     |      |      |      |
| Yes                                     | 3399 | 84.1 | 520 | 72.7 | 2879 | 87.0 | 2583 | 84.0 | 404 | 73.2 | 2179 | 86.4 |
| No                                      | 610  | 15.1 | 195 | 27.3 | 415  | 12.5 | 478  | 15.6 | 146 | 26.5 | 332  | 13.2 |
| Never had sex                           | 14   | 0.3  | 0   | -    | 14   | 0.4  | 5    | 0.2  | 0   | 0.0  | 5    | 0.2  |
| Missing                                 | 20   | 0.5  | 3   | 0.42 | 17   | 0.51 | 8    | 0.3  | 2   | 0.4  | 6    | 0.2  |
| <b>Condom use within last 12 months</b> |      |      |     |      |      |      |      |      |     |      |      |      |
| No sex within last 12 months            | 610  | 15.1 | 195 | 27.3 | 415  | 12.6 | 478  | 15.6 | 146 | 26.5 | 332  | 13.2 |
| At every intercourse                    | 509  | 12.6 | 187 | 26.2 | 322  | 9.8  | 381  | 12.4 | 139 | 25.2 | 242  | 9.6  |
| Rarely                                  | 204  | 5.0  | 29  | 4.1  | 175  | 5.3  | 146  | 4.8  | 25  | 4.5  | 121  | 4.8  |
| No condom use                           | 2678 | 66.2 | 303 | 42.4 | 2375 | 71.9 | 2052 | 66.8 | 239 | 43.3 | 1813 | 71.9 |
| Never had sex                           | 14   | 0.3  | 0   | -    | 14   | 0.4  | 5    | 0.2  | 0   | 0.0  | 5    | 0.2  |
| Missing                                 | 28   | 0.7  | 4   | 0.56 | 24   | 0.72 | 12   | 0.4  | 3   | 0.5  | 9    | 0.4  |
| <b>Number of lifetime partners</b>      |      |      |     |      |      |      |      |      |     |      |      |      |
| 1                                       | 1476 | 36.5 | 197 | 28.1 | 1279 | 39.0 | 1129 | 36.7 | 158 | 28.6 | 971  | 38.5 |
| 2                                       | 1053 | 26.0 | 194 | 27.7 | 859  | 26.2 | 819  | 26.6 | 155 | 28.1 | 664  | 26.3 |
| 3                                       | 709  | 17.5 | 147 | 21.0 | 562  | 17.1 | 516  | 16.8 | 101 | 18.2 | 415  | 16.5 |
| 4                                       | 284  | 7.0  | 60  | 8.6  | 224  | 6.8  | 221  | 7.2  | 46  | 8.3  | 175  | 6.8  |
| 5-8                                     | 329  | 8.1  | 65  | 9.3  | 264  | 8.1  | 255  | 8.3  | 49  | 8.9  | 206  | 8.2  |
| >9                                      | 113  | 2.8  | 38  | 5.4  | 75   | 2.3  | 89   | 2.9  | 33  | 6.0  | 56   | 2.2  |
| Never had sex                           | 14   | 0.3  | 0   | -    | 14   | 0.4  | 5    | 0.2  | 0   | 0.0  | 5    | 0.2  |
| Missing                                 | 65   | 1.6  | 17  | 2.4  | 48   | 1.4  | 40   | 1.3  | 10  | 1.8  | 30   | 1.2  |

\*According to HIV-status at baseline



1  
2  
3  
4 260 Among the 4043 participants at baseline, the cervical sample was insufficient for HPV analysis in 396  
5  
6 261 women (9.8%) leaving 3667 women eligible for analysis of HPV-positivity. Further, 27 women (0.5%) did  
7  
8 262 not have any cervical cytology, leaving 4116 women available for cytological analysis of cervical lesions.  
9  
10 263 All 4043 women were either tested for HIV or had previously tested HIV-positive. At baseline, 696 women  
11  
12 264 (17.2%) tested HR HPV-positive by HC2. The cytology showed that overall 3.4% (n=139) had HSIL+ whilst  
13  
14 265 8.1% (n=329) of women had LSIL.  
15  
16  
17 266  
18

## 19 267 **1st follow-up findings**

20  
21  
22 268 A total of 3805 women (94%) were eligible for 1<sup>st</sup> follow-up – 238 women (6%) were ineligible due to  
23  
24 269 becoming pregnant, having moved, having had a hysterectomy or having become sick or died (fig 1). Of the  
25  
26 270 3805 women, 3074 women (81%) attended the first follow-up visit approximately 14<sup>th</sup> months after  
27  
28 271 enrolment. However, among the attendees only 500 (16%) attended within in 30 days of their scheduled  
29  
30 272 appointment date and without being traced for follow-up. A total of 1088 (35%) attended the clinic after a  
31  
32 273 phone call reminder (tracing method I), 62 women (2%) attended the clinic after a nurse home-visit (tracing  
33  
34 274 method II), whilst 1253 women (41%) were followed up at home and had specimens collected using self-  
35  
36 275 sampling device (tracing method III). A total of 731 women (19%) were lost to follow-up (fig 1).  
37  
38  
39 276  
40

41 277 *(Fig 1: Flow chart of enrolment and follow-up of CONCEPT cohort)*  
42  
43 278  
44

45 279 The women who participated in the 1<sup>st</sup> follow-up were very similar to those who did not attend when looking  
46  
47 280 at socio-demographic factors (table 2). However, overall fewer women were HR HPV-positive at follow-up  
48  
49 281 compared to baseline (14.8% vs. 17.2%), and fewer HIV-positive women were HR HPV-positive at follow-  
50  
51 282 up compared to baseline (24.1% vs. 33.7%) (table 3).  
52  
53  
54 283  
55

56 284 **Table 3. High-risk HPV, HIV, and cytology results at baseline and 1<sup>st</sup> follow-up**

| Baseline | First follow up |
|----------|-----------------|
|----------|-----------------|

| Total (N=4043) |      |      |             | Total (N=3074) |      |             |
|----------------|------|------|-------------|----------------|------|-------------|
| HPV            | n    | %    | (95% CI)    | n              | %    | (95% CI)    |
| Positive       | 696  | 17.2 | (0.16-0.18) | 438            | 14.3 | (0.13-0.16) |
| Negative       | 2951 | 73   | (0.72-0.74) | 2595           | 84.4 | (0.83-0.86) |
| Missing        | 396  | 9.8  | (0.09-0.1)  | 41             | 1.3  | (0.01-0.02) |
| HIV            |      |      |             |                |      |             |
| Positive       | 718  | 17.8 | (0.17-0.19) | 552            | 18   | (0.17-0.2)  |
| Negative       | 3325 | 82.2 | (0.81-0.83) | 2522           | 82   | (0.80-0.83) |
| Cytology       |      |      |             |                |      |             |
| HSIL           | 139  | 3.4  | (0.03-0.04) |                |      |             |
| LSIL           | 329  | 8.1  | (0.07-0.09) |                |      |             |
| Negative       | 3548 | 87.8 | (0.87-0.89) |                |      |             |
| Missing        | 27   | 0.7  | (0.00-0.01) |                |      |             |

## Strengths and Limitations

This is a large-scale longitudinal cervical cancer study conducted in an HIV endemic population that aims to address a major cause of disease among East-African women, which so far has not received much focus within global health research. Women are followed over a long duration of time and with a large amount of data being collected by use of questionnaires and lab tests. Given the nature of our study a significant attrition rate was expected. However, with the carefully designed tracing plans and dedicated home-visiting staff we managed to attain an 81% participation rate at 1<sup>st</sup> follow-up. As women were enrolled during a patient-initiated screening at screening clinics, detailed HIV documentation was challenging to obtain as Care and Treatment Clinic (CTC) cards were poorly documented or had not been brought to the screening. Despite the nurses calling these women after enrolment to retrieve the information, it was not provided by many HIV-positive participants. This has led to a certain amount of missing values for a few variables and have limited our ability and power in analyses involving HIV immunologic markers and treatment.

1  
2  
3  
4  
5  
6  
7  
8  
9  
10  
11  
12  
13  
14  
15  
16  
17  
18  
19  
20  
21  
22  
23  
24  
25  
26  
27  
28  
29  
30  
31  
32  
33  
34  
35  
36  
37  
38  
39  
40  
41  
42  
43  
44  
45  
46  
47  
48  
49  
50  
51  
52  
53  
54  
55  
56  
57  
58  
59  
60

## Future plans

Based on our large-scale data of both HPV infection in general and type specific characterised by the women's HIV-status, we plan to integrate this data with a previous cross-sectional HPV study (PROTECT Study) conducted in this population as this can increase power in our findings. As we have already established a large cohort of participants, we foresee a potential to further characterise the natural history of HPV, the HPV burden and HPV-related disease and establish potential risk factors over a longer course of time. Further, we also foresee the possibility of linking our evidence with other groups in this population including males, adolescents, and pregnant women. This may provide additional information on the similarities of epidemiological burden among these group and delineate differences in the correlations of HPV and HPV-related disease across these different groups.

## Collaboration

Researchers interested in collaboration in this discipline especially in East and Central Africa are welcomed. This may be in extracting data from the project, jointly requesting further investigation from the cohort.

## Financial disclosure

The work was supported by the Danish International Development Agency (Danida; 14-P02-Tan/A26775). The recipient of the grant was the primary investigator of the CONCEPT study (JM). The funders had no role in study design, data collection and analysis, decision to publish, or preparation of the manuscript.

## Acknowledgements

We would like to thank Danida for supporting this study and thank all partners involved in the CONCEPT study: Screening nurses, outreach nurses, laboratory personnel, and all the women who are part of the CONCEPT study.

## Contributors

JM, RM, VR, and SKK designed the CONCEPT study. JM, RM, RV, SKK, JK, PS, CK, BM, and DSL were involved in collecting data for the study. CW, SKK, VR, BM, and DSL, were involved in data analysis and interpretation. CW, BM, DSL contributed to the conception of this article, and CW, BM, DSL, PS, JK, CK, VR, JM, SKK, and RM were involved in the manuscript writing and revision. All authors read and approved the final manuscript.

## Data sharing statement

Data collected for the CONCEPT cohort study are available upon request. Individual participant data will be identified. Additional available data include the CONCEPT eligibility and informed consent form, the CONCEPT contact information form, the protocol for how to deliver HPV-positive results to participants, the protocol for how to trace non-attendants. Data will be made available upon request by contacting the first or last author of this study by email at [barikimchome@gmail.com](mailto:barikimchome@gmail.com)/[dsondergaard@health.sdu.dk](mailto:dsondergaard@health.sdu.dk), who will then seek approval by the primary investigator in the CONCEPT project, Julius D. Mwaïselage.

## Supplementary material

|             |                                                 |
|-------------|-------------------------------------------------|
| S1 appendix | Original protocol for CONCEPT study             |
| S2 appendix | STROBE checklist                                |
| S3 appendix | CONCEPT baseline questionnaire                  |
| S4 appendix | CONCEPT 1 <sup>st</sup> follow-up questionnaire |

## Abbreviations

|    |     |                   |                                                                                      |
|----|-----|-------------------|--------------------------------------------------------------------------------------|
| 1  |     |                   |                                                                                      |
| 2  |     |                   |                                                                                      |
| 3  |     |                   |                                                                                      |
| 4  | 346 | ACCME             | African Collaborative Center for Microbiome and Genomics Research                    |
| 5  |     |                   |                                                                                      |
| 6  | 347 | AGC               | Atypical glandular cell                                                              |
| 7  |     |                   |                                                                                      |
| 8  | 348 | AIS               | Adenocarcinoma in situ                                                               |
| 9  |     |                   |                                                                                      |
| 10 | 349 | ASCUS             | Atypical squamous cell of undetermined significance                                  |
| 11 |     |                   |                                                                                      |
| 12 | 350 | ASCH              | Atypical squamous cell in which High grade squamous intraepithelial lesion cannot be |
| 13 |     |                   |                                                                                      |
| 14 | 351 |                   | excluded                                                                             |
| 15 |     |                   |                                                                                      |
| 16 | 352 | CTC               | Care and treatment clinic                                                            |
| 17 |     |                   |                                                                                      |
| 18 | 353 | CONCEPT           | Comprehensive Cervical Cancer Prevention in Tanzania                                 |
| 19 |     |                   |                                                                                      |
| 20 | 354 | Danida            | Danish International Development Agency                                              |
| 21 |     |                   |                                                                                      |
| 22 | 355 | HARP              | HPV in Africa Research Partnership                                                   |
| 23 |     |                   |                                                                                      |
| 24 | 356 | HC2               | Hybrid Capture 2                                                                     |
| 25 |     |                   |                                                                                      |
| 26 | 357 | HIC               | High-income countries                                                                |
| 27 |     |                   |                                                                                      |
| 28 | 358 | HIV               | Human immuno-deficiency virus                                                        |
| 29 |     |                   |                                                                                      |
| 30 | 359 | HPV               | Human papilloma virus                                                                |
| 31 |     |                   |                                                                                      |
| 32 | 360 | HSIL              | High grade squamous intraepithelial lesion                                           |
| 33 |     |                   |                                                                                      |
| 34 | 361 | KCMC              | Kilimanjaro Christian Medical Centre                                                 |
| 35 |     |                   |                                                                                      |
| 36 | 362 | LEEP              | Loop electrosurgical procedure                                                       |
| 37 |     |                   |                                                                                      |
| 38 | 363 | LMIC              | Low- and middle-income countries                                                     |
| 39 |     |                   |                                                                                      |
| 40 | 364 | LSIL              | Low grade squamous intraepithelial lesion                                            |
| 41 |     |                   |                                                                                      |
| 42 | 365 | NILM              | Negative for intra epithelial lesion                                                 |
| 43 |     |                   |                                                                                      |
| 44 | 366 | PROTECT           | Prevention of Cervical Cancer in Tanzania                                            |
| 45 |     |                   |                                                                                      |
| 46 | 367 | ORCI              | Ocean Road Cancer Institute                                                          |
| 47 |     |                   |                                                                                      |
| 48 | 368 |                   |                                                                                      |
| 49 |     |                   |                                                                                      |
| 50 | 369 |                   |                                                                                      |
| 51 |     |                   |                                                                                      |
| 52 |     |                   |                                                                                      |
| 53 |     |                   |                                                                                      |
| 54 |     |                   |                                                                                      |
| 55 | 370 | <b>References</b> |                                                                                      |
| 56 |     |                   |                                                                                      |
| 57 |     |                   |                                                                                      |
| 58 |     |                   |                                                                                      |
| 59 |     |                   |                                                                                      |
| 60 |     |                   |                                                                                      |

1  
2  
3  
4  
5  
6  
7  
8  
9  
10  
11  
12  
13  
14  
15  
16  
17  
18  
19  
20  
21  
22  
23  
24  
25  
26  
27  
28  
29  
30  
31  
32  
33  
34  
35  
36  
37  
38  
39  
40  
41  
42  
43  
44  
45  
46  
47  
48  
49  
50  
51  
52  
53  
54  
55  
56  
57  
58  
59  
60

1. World Health Organisation: **Improving data for decision-making: a toolkit for cervical cancer prevention and control programmes**. In. Geneva: World Health Organization; 2018.
2. Serrano B, Brotons M, Bosch FX, Bruni L: **Epidemiology and burden of HPV-related disease**. *Best Pract Res Clin Obstet Gynaecol* 2018, **47**:14-26.
3. Torre LA, Islami F, Siegel RL, Ward EM, Jemal A: **Global Cancer in Women: Burden and Trends**. *Cancer epidemiology, biomarkers & prevention : a publication of the American Association for Cancer Research, cosponsored by the American Society of Preventive Oncology* 2017, **26**(4):444-457.
4. Bruni LB-RL AG, Serrano B: **Human Papillomavirus and Related Diseases in Tanzania.Summary Report**. *ICO Information Centre on HPV and Cancer (HPVInformation Centre)* 2016, **15**.
5. Dartell MA, Rasch V, Iftner T, Kahesa C, Mwaiselage JD, Junge J, Gernow A, Ejlersen SF, Munk C, Kjaer SK: **Performance of visual inspection with acetic acid and human papillomavirus testing for detection of high-grade cervical lesions in HIV positive and HIV negative Tanzanian women**. *International journal of cancer* 2014, **135**(4):896-904.
6. Katanga J, Kjaer SK, Manongi R, Wu CS, Iftner T, Waldstrom M, Pembe AB, Mwaiselage J, Rasch V: **Performance of careHPV, hybrid capture 2 and visual inspection with acetic acid for detection of high-grade cervical lesion in Tanzania: A cross-sectional study**. *PloS one* 2019, **14**(6):e0218559.
7. Gard AC, Soliman AS, Ngoma T, Mwaiselage J, Kahesa C, Chamberlain RM, Harlow SD: **Most women diagnosed with cervical cancer by a visual screening program in Tanzania completed treatment: evidence from a retrospective cohort study**. *BMC public health* 2014, **14**:910.
8. Bruni L, Diaz M, Castellsague X, Ferrer E, Bosch FX, de Sanjose S: **Cervical human papillomavirus prevalence in 5 continents: meta-analysis of 1 million women with normal cytological findings**. *J Infect Dis* 2010, **202**(12):1789-1799.
9. Nowak RG, Gravitt PE, Morrison CS, Gange SJ, Kwok C, Oliver AE, Howard R, Van der Pol B, Salata RA, Padian NS *et al*: **Increases in human papillomavirus detection during early HIV infection among women in Zimbabwe**. *J Infect Dis* 2011, **203**(8):1182-1191.
10. Dames DN, Blackman E, Butler R, Taioli E, Eckstein S, Devarajan K, Griffith-Bowe A, Gomez P, Ragin C: **High-risk cervical human papillomavirus infections among human immunodeficiency virus-positive women in the Bahamas**. *PloS one* 2014, **9**(1):e85429.
11. Looker KJ, Ronn MM, Brock PM, Brisson M, Drolet M, Mayaud P, Boily MC: **Evidence of synergistic relationships between HIV and Human Papillomavirus (HPV): systematic reviews and meta-analyses of longitudinal studies of HPV acquisition and clearance by HIV status, and of HIV acquisition by HPV status**. *Journal of the International AIDS Society* 2018, **21**(6):e25110.
12. Akarolo-Anthony SN, Famooto AO, Dareng EO, Olaniyan OB, Offiong R, Wheeler CM, Adebamowo CA: **Age-specific prevalence of human papilloma virus infection among Nigerian women**. *BMC public health* 2014, **14**:656.
13. Guan P, Howell-Jones R, Li N, Bruni L, de Sanjose S, Franceschi S, Clifford GM: **Human papillomavirus types in 115,789 HPV-positive women: a meta-analysis from cervical infection to cancer**. *International journal of cancer* 2012, **131**(10):2349-2359.
14. WHO (2019). World Health Organization. Human papillomavirus (HPV) and cervical cancer [Internet] Available from [https://www.who.int/en/news-room/fact-sheets/detail/human-papillomavirus-\(hpv\)-and-cervical-cancer](https://www.who.int/en/news-room/fact-sheets/detail/human-papillomavirus-(hpv)-and-cervical-cancer)
15. Bosch FX, Munoz N: **The viral etiology of cervical cancer**. *Virus research* 2002, **89**(2):183-190.
16. Kelly HA, Ngou J, Chikandiwa A, Sawadogo B, Gilham C, Omar T, Lompo O, Doutre S, Meda N, Weiss HA *et al*: **Associations of Human Papillomavirus (HPV) genotypes with high-grade cervical neoplasia (CIN2+) in a cohort of women living with HIV in Burkina Faso and South Africa**. *PloS one* 2017, **12**(3):e0174117.
17. Adebamowo SN, Dareng EO, Famooto AO, Offiong R, Olaniyan O, Obende K, Adebayo A, Ologun S, Alabi B, Achara P *et al*: **Cohort Profile: African Collaborative Center for Microbiome and Genomics Research's (ACCME's) Human Papillomavirus (HPV) and Cervical Cancer Study**. *International journal of epidemiology* 2017, **46**(6):1745-1745j.
18. Dartell M, Rasch V, Kahesa C, Mwaiselage J, Ngoma T, Junge J, Gernow A, Ejlersen SF, Munk C, Iftner T *et al*: **Human papillomavirus prevalence and type distribution in 3603 HIV-positive and HIV-negative women in the general population of Tanzania: the PROTECT study**. *Sexually transmitted diseases* 2012, **39**(3):201-208.

1  
2  
3  
4  
5  
6  
7  
8  
9  
10  
11  
12  
13  
14  
15  
16  
17  
18  
19  
20  
21  
22  
23  
24  
25  
26  
27  
28  
29  
30  
31  
32  
33  
34  
35  
36  
37  
38  
39  
40  
41  
42  
43  
44  
45  
46  
47  
48  
49  
50  
51  
52  
53  
54  
55  
56  
57  
58  
59  
60

19. Watson-Jones D, Baisley K, Brown J, Kavishe B, Andreasen A, Changalucha J, Mayaud P, Kapiga S, Gumodoka B, Hayes RJ *et al*: **High prevalence and incidence of human papillomavirus in a cohort of healthy young African female subjects**. *Sexually transmitted infections* 2013, **89**(5):358-365.
20. Houlihan CF, Baisley K, Bravo IG, Kapiga S, de Sanjose S, Changalucha J, Ross DA, Hayes RJ, Watson-Jones D: **Rapid acquisition of HPV around the time of sexual debut in adolescent girls in Tanzania**. *Int J Epidemiol* 2016, **45**(3):762-773.
21. Baisley KJ, Andreasen A, Irani J, Nnko S, Changalucha J, Crucitti T, Francis S, Holm Hansen C, Hayes RJ, Buve A *et al*: **HPV prevalence around the time of sexual debut in adolescent girls in Tanzania**. *Sex Transm Infect* 2019.
22. Tsu VD, Njama-Meya D, Lim J, Murray M, de Sanjose S: **Opportunities and challenges for introducing HPV testing for cervical cancer screening in sub-Saharan Africa**. *Preventive medicine* 2018, **114**:205-208.
23. Linde DS, Andersen MS, Mwaiselage JD, Manongi R, Kjaer SK, Rasch V: **Text messages to increase attendance to follow-up cervical cancer screening appointments among HPV-positive Tanzanian women (Connected2Care): study protocol for a randomised controlled trial**. *Trials* 2017, **18**(1):555.
24. Linde DS, Rasch V, Mwaiselage JD, Gammeltoft TM: **Competing needs: a qualitative study of cervical cancer screening attendance among HPV-positive women in Tanzania**. *BMJ open* 2019, **9**(2):e024011.
25. Linde DS AM, Mwaiselage JD, Manongi R, Kjaer SK, Rasch V: **One-way text messages versus no text messages on attendance to follow-up cervical cancer screening among HPV-positive Tanzanian Women (Connected2Care): a parallel-group randomized controlled trial**. *JMIR Preprints* 15/08/2019:15863.
26. Koliopoulos G, Nyaga VN, Santesso N, Bryant A, Martin-Hirsch PP, Mustafa RA, Schunemann H, Paraskevaidis E, Arbyn M: **Cytology versus HPV testing for cervical cancer screening in the general population**. *The Cochrane database of systematic reviews* 2017, **8**:Cd008587.
27. Dartell M, Rasch V, Munk C, Kahesa C, Mwaiselage J, Iftner T, Kjaer SK: **Risk factors for high-risk human papillomavirus detection among HIV-negative and HIV-positive women from Tanzania**. *Sexually transmitted diseases* 2013, **40**(9):737-743.
28. **Cervical Cancer Prevention Guidelines for Low-Resource Settings**  
[<http://reprolineplus.org/system/files/resources/CeCaPfullmanual.pdf>]
29. Nayar R, Wilbur DC: **The Pap Test and Bethesda 2014. "The reports of my demise have been greatly exaggerated." (after a quotation from Mark Twain)**. *Acta Cytol* 2015, **59**(2):121-132.
30. Xu L, Padalko E, Ostrbenk A, Poljak M, Arbyn M: **Clinical Evaluation of INNO-LiPA HPV Genotyping EXTRA II Assay Using the VALGENT Framework**. *Int J Mol Sci* 2018, **19**(9).

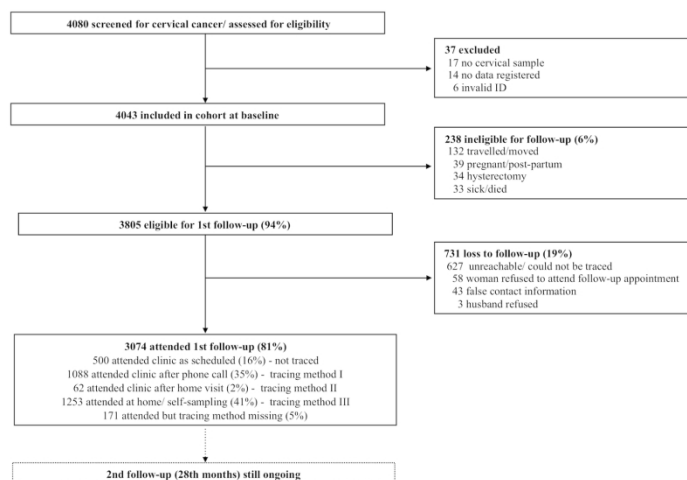

Flow chart

190x134mm (300 x 300 DPI)



## Appendix A: Project Description

### Comprehensive Cervical Cancer Prevention in Tanzania (CONCEPT)

#### 1. Project Summary

The natural history of Human papillomavirus (HPV) in sub-Saharan Africa is not yet fully understood. As persistent HPV infection is a necessary factor in development of cervical cancer – a major health problem in sub-Saharan Africa – information about how HIV together with other risk factors interacts with HPV acquisition and HPV persistence/clearance is warranted. Additionally, concern prevails about the quality of cervical cancer preventive strategies in sub-Saharan Africa. Against this background the project aims to provide a better understanding of the natural history of HPV with a view to HIV status, to measure the impact of a novel and simple screening method based on *CareHPV* testing and to assess how continuity of care among women who are tested HPV positive can be improved. The study will be linked up with the existing cervical cancer screening program at Ocean Road Cancer Institute (ORCI) and Kilimanjaro Christian Medical Centre (KCMC); and will include 4000 women who are attending screening service or HIV care and treatment. HPV acquisition and persistence/clearance patterns as well as the absolute risk of severe cervical precancerous lesions will be determined through a follow up study lasting 28 months. The test performance of *CareHPV* testing, liquid-based cytology and VIA will be described and the operating characteristics of the three screening methods will be assessed according to HIV status. Finally, the impact of a mobile phone intervention and a patient navigation model will be assessed and compared according to the proportion of HPV positive women who return for follow-up examinations. Additionally, the project will implement a research capacity building component focusing on transfer of knowledge and technology as well as training of PhD students. The activities will be carried out as five sub-studies: i) HPV acquisition pattern; ii) HPV persistence/clearance pattern; iii) Test performance of *CareHPV* testing, liquid-based cytology and VIA; iv) Continuity of care among screened positive women and v) research capacity building as well as transfer of knowledge and technology

#### 2. Objectives

With the overall aim of substantially improving cervical cancer prevention in Tanzania and thereby reduce mortality, the CONCEPT project focuses on the natural history of human papillomavirus (HPV), which is the most important risk factor for cervical cancer.

HPV can take the form of being either a transient infection, that relatively rapidly is cleared by the host immune system or it can become a persistent infection that may progress to high-grade cervical lesions or cervical cancer (**Fig. 1**). In spite of the fact that cervical cancer is the most common malignancy among women in Sub-Saharan Africa (1), little is known about the distribution of HPV types, risk factors of incidence and patterns of persistence for different HPV types. The proposed project will address this lack of knowledge and provide new information about the natural history of HPV and consequences of HPV infection among HIV positive and HIV negative women. In addition, there is concern about the performance of the screening approaches applied in many sub-Saharan African countries and information on the quality of novel, affordable screening approaches that will perform well in remote areas is warranted. Finally, in many sub-Saharan African settings worries prevail about lack of continuity of care among women who are diagnosed with precancerous lesions and therefore relevant treatment is not always offered. The proposed project will address these shortcomings in cervical cancer prevention. The research will build on the results previously obtained by our research team (2-6) and will be innovative in the way that it through a comprehensive approach will use the natural history of HPV to identify opportunities to strengthen and further develop the existing screening program in Tanzania, with a particular view to the importance of HIV positivity. In addition, with the aim to bridge the gap in continuity of care among women diagnosed with precancerous lesions, the project will develop and test a reliable and sustainable communication system through a multidisciplinary approach, involving community education, social mobilization and use of cell-phones. Thus the proposed study has the potential to produce results with immediate public health impact.

1  
2 The specific objectives of the project are:

- 3 1. To assess acquisition patterns and incidence of HPV infection with a specific focus on  
4 differences in HPV acquisition, distribution of HPV types and risk factors among HIV  
5 positive and HIV negative women  
6
- 7 2. To assess persistence of high-risk HPV infection with a specific focus on whether there  
8 are differences in HPV persistence in relation to specific HPV types and differences in  
9 risk factors for HPV persistence among HIV positive and HIV negative women. In  
10 addition, it is the aim to examine the absolute risk of HSIL or worse in relation to both  
11 one time HPV positivity and HPV persistence while taking HIV status into account  
12
- 13 3. To evaluate the performance of Self collected *CareHPV* testing, health provider collected  
14 HPV test, Pap smear (liquid-based cytology) and visual inspection with acetic acid (VIA)  
15 for detection of cervical precancerous lesions with a special view to test performance  
16 among HIV positive and HIV negative women.  
17
- 18 4. To evaluate and compare two different interventions aiming at ensuring continuity of  
19 care among women who are tested HPV positive in terms of effect and costs, and to  
20 describe barriers for not adhering to the scheduled follow-up  
21
- 22 5. To enhance research capacity and transfer of knowledge and technology through the  
23 training of PhD students and the involvement of a post-doctoral fellow  
24

### 25 3. Project's methodology

26 Based on the experience and success of our previous study of HPV prevalence in Tanzanian  
27 women, the present study will be linked up with the existing cervical cancer screening program  
28 in Dar es Salaam and Kilimanjaro Region. To make sure that we will include enough HIV  
29 positive women into the study, we will oversample HIV positive women. This will be done  
30 through enrolment of women attending HIV care and treatment in the two study areas. A total  
31 of 4000 women will be enrolled at baseline in the study - 3500 women from the two screening  
32 settings and 500 HIV positive women from two HIV care and treatment clinics. Based on our  
33 previous experience, among the 3500 women recruited from the screening settings, around  
34 700 will be high-risk (HR)-HPV positive and nearly 350 women will be HIV positive(2). Among  
35 the 500 HIV positive women recruited from the HIV clinics, an estimated 250 women will  
36 be HPV positive(2). Hence, the total study sample of 4000 women will include an estimated 950  
37 HPV positive and 850 HIV positive women. A power calculation was based on McNemars test in  
38 the situation where we compare two diagnostic tests (1: standard test (VIA) vs 2: new test  
39 (*CareHPV*)) where the outcome is sensitivity  $S_1$  and  $S_2$ , respectively. Based on our previous  
40 studies in Tanzania (4) it is estimated that 180-200 women will have precancerous lesions at  
41 baseline (~true positive), and we assume a significance level of 5% and that the sensitivity of  
42 the standard test is  $S_1=30\%$ . We will then with 80% power be able to detect a significant  
43 difference if the sensitivity of the new test is at least  $S_2=44\%$ . As we anticipate *CareHPV*  
44 testing to have a much higher sensitivity, we will have sufficient power in the present study  
45

46  
47 An overview of the study design is outlined in **Fig. 2**. In principle the study comprises a  
48 baseline visit and 2 follow-up visits:  
49

50  
51 **At baseline** we will collect on all participating women a cervical sample for *CareHPV* testing, a  
52 novel and simple quick test for detection of HPV. We will also obtain a liquid-based cervical swab  
53 (ThinPrep) for cytology examination (subsequently prepared and diagnosed in Denmark), high-  
54 risk Hybrid Capture (HC2) testing (in Germany), and genotyping (PCR-based HPV testing in  
55 Germany). Following this, VIA will be done with 5% acetic acid. The Tanzanian staff will  
56 receive training (re-training) in sample collection and VIA before start of the study by national  
57 trainers according to IARC guidelines. In case of a positive cytology (HSIL or worse) the  
58 woman will be called in and will be treated according to the cervical cancer screening standard  
59 of care methods in Tanzania. Similarly, all VIA positive women will be treated according to the  
60 cervical cancer screening standard of care methods in Tanzania. Information on socio-economic  
characteristics, lifestyle factors and reproductive history will be recorded through a personal

1  
2 interview, and blood samples for HIV testing will be obtained. Before the initiation of the study,  
3 the staff in Tanzania will receive training in *CareHPV* testing. The *CareHPV* (including currently  
4 known HR-HPV types 16, 18, 31, 33, 35, 39, 45, 51, 52, 56, 58, 59, 66, and 68) will be tested  
5 within 14 days in Tanzania. At the **first follow-up**, taking place 14 months after inclusion, a  
6 randomly selected sample of 500 women will be trained on self-collection of a cervical swab for  
7 HPV testing. Thereafter another cervical swab (ThinPrep) will be collected (on all study  
8 subjects in the 1<sup>st</sup> follow-up) by a trained health provider. At the **second follow-up**, taking  
9 place 26 months after inclusion, a cervical swab (ThinPrep) will be obtained from each woman.  
10 Women who do not return to the clinic for first and second follow-up will be traced and visited  
11 at home and invited to attend the clinic for screening. If they do not wish to re-attend, they  
12 will be offered screening through a self-collected HPV sample. We anticipate a response rate in  
13 the 1<sup>st</sup> follow-up at 90% and a response rate in the 2<sup>nd</sup> follow-up at 80%. The anticipated  
14 follow-up rate is based on experiences from previous follow-up studies in Tanzania (7).  
15 The study is grouped in five work package according to the specific objectives:  
16  
17

**Work package 1, Acquisition patterns of high-risk (HR) human papillomavirus (HPV) with a special view to HIV status:** Among women testing HR-HPV negative at baseline (Fig. 2), all women testing HIV positive (~190 from the screening clinic and 250 from HIV clinics = 440 in total) as well as a random sample of 560 HPV negative/HIV negative women will be invited to a new gynecological examination after 14 months (1<sup>st</sup> follow-up visit), where a health provider cervical swab (ThinPrep) sample on all women is taken. These samples will all be tested for HPV using HC2 and genotyping will be performed on the HPV positive samples. At the 2<sup>nd</sup> follow-up visit (at 26 months) a health provider taken cervical swab (ThinPrep) will be obtained. All samples from the 2<sup>nd</sup> follow-up will be sent to Denmark for establishment of a cytology diagnosis and the remaining material will be sent to Germany for HC2 testing and subsequent genotyping of the HPV positives. All cytology results and HPV results will be sent back to Tanzania. In case of a positive cytology (HSIL or worse) the woman will be called in and will be treated according to the cervical cancer screening standard of care methods in Tanzania.

Based on the literature (8) we estimate an HPV acquisition rate among the initially HPV negative women at 1<sup>st</sup> follow-up of around 10%, similarly an acquisition rate of 10% from the 1<sup>st</sup> to the 2<sup>nd</sup> follow-up. The association between HR-HPV acquisition and the women's age, life style characteristics, reproductive history and HIV status will be assessed.

**Work package 2, Persistence patterns of high-risk HPV types and absolute risk of severe cervical lesions focusing on the importance of HIV status:** Persistence/clearance patterns of HR-HPV will be determined among all women who are HR-HPV positive at baseline (Fig. 2) (~700 from the screening clinic and 250 from the HIV clinic i.e. ~950 in total). They will be invited for follow-up examinations and tested for HR-HPV after 14 and 26 months (1<sup>st</sup> and 2<sup>nd</sup> follow-up visit). For this group of women also a self-collected cervical swab will be obtained at the 1<sup>st</sup> follow-up in 500 randomly selected women. HPV genotyping will be performed among women who are HR-HPV positive during follow-up. Women who are persistently HPV positive for the same HPV type at enrolment and at 1<sup>st</sup> follow-up will be called in for a cytological examination at the respective clinic. Also in case of a positive cytology (HSIL or worse), the women will be called in for further follow-up. HR-HPV persistence/clearance patterns will be described in relation to the women's age, life style characteristics, reproductive history, HIV status and HPV genotype. We estimate a persistence rate of 40% after 14 months and of 20% after 26 months (9). Due to the fact that a cytology diagnosis is obtained on all women at the 2<sup>nd</sup> follow-up, we will also be able to look at the absolute risk of HSIL or worse in relation to both one time HPV positivity, HPV persistence and according to HIV status.

**Work package 3, Test performance of CareHPV testing, pap smear and VIA for detection of cervical precancerous lesions:** As described above, all 4000 women enrolled will be screened by use of *CareHPV* testing, Pap smear (liquid based cytology i.e. ThinPrep) and VIA at the study baseline, and the sensitivity and specificity of *CareHPV* testing and VIA will be estimated and the positive and negative predictive values calculated. The operating

1  
2 characteristics of the two screening methods will be assessed according to HIV status. All VIA  
3 positive women will subsequently be treated in agreement with the cervical cancer screening  
4 standard of care methods in Tanzania. In case of a positive cytology that was not already  
5 identified through a positive VIA, the women will be called in for further follow-up. High-quality  
6 cervical liquid-based cytology and where possible also cervical biopsies will be used as Gold  
7 Standard. Based on the samples collected at the 1<sup>st</sup> follow-up, the HPV results from the self-  
8 collected brush and the health provider collected brush will be compared.  
9

10 **Work package 4, Continuity of care among women who are tested are HPV positive –**  
11 **a comparison of two different interventions:** Women who are tested HPV positive at  
12 enrolment will be randomized to either a patient navigation model or a cell phone model  
13 consisting of automated SMS messages. *Patient navigation model:* A trained community health  
14 worker will be identified as the woman's patient navigator. There will be established a one-to-  
15 one relationship between the patient navigator and the woman to address anticipated barriers  
16 such as communication difficulties and difficulties with arranging transportation. *Cell phone*  
17 *model:* HPV positive women will receive automatically generated SMS messages, which will  
18 convey HPV result, send appointment reminders and health information during the first 12-14  
19 months follow-up period. After 20 months, the continuity of care, based on the number of HPV  
20 positive women who return for the 1<sup>st</sup> follow-up examination after 14 months, will be  
21 compared. Additionally, the average time spent providing navigation from an HPV positive  
22 result is established to 12-14 months after and the associated cost will be calculated. Likewise  
23 the price of establishing and maintaining the system generating the SMS reminders will be  
24 measured. The differences in total costs and re-attendance between patient navigation and  
25 SMS reminders will be calculated. Re-attendance will be defined as HPV positive woman who  
26 re-attend within 12-14 months after the HPV positive result is established. Finally, HPV positive  
27 women who do not re-attend for screening after 12-14 months will be traced and interviewed.  
28 A mixed method approach, relying on structured questionnaires, in-depth interview and key  
29 informant interviews will be used to describe perceived barriers for attending 12-14 months  
30 follow-up.  
31  
32  
33

34 **Work package 5, Health service capacity building for cervical cancer**  
35 **prevention:** Health service capacity building will be performed at primary, secondary and  
36 tertiary level. At the primary and secondary levels, key barriers for optimal use of existing  
37 communication paths for ensuring continuity of care among women diagnosed with  
38 precancerous lesions will be identified through a register based desk study. Based on the  
39 results, interview guides will be developed for in-depth interviews with health providers  
40 working at primary and secondary level and community representatives. The experiences from  
41 this assessment will be used to develop a training program in cervical cancer prevention and  
42 patient navigation that will include staff at primary and secondary health units together with  
43 community health workers in Dar es Salaam and Kilimanjaro Region. The trained community  
44 health worker will be employed as patient navigators. At tertiary level, the project will respond  
45 to the research needs set forth by ORCI and KCMC. Three PhD courses, one in Clinical Trials,  
46 one in Prevention and Control of Gynaecological Cancers and one in Policy Brief Writing will be  
47 offered at KCMC in alignment with the exiting BSU initiatives at KCMC. The PhD courses will be  
48 co-developed and co-taught by Tanzanian and Danish researchers. At both ORCI and KCMC  
49 there is a need to strengthen the capacities of researchers to undertake in-country PhD  
50 training at an international level. To address this need, four PhD studies, three Tanzanian and  
51 one Danish (co funded by SDU), will be included in the project. The Tanzanian PhD students  
52 will be recruited through public announcement of the scholarships and competitive  
53 applications. Two of the Tanzanian PhD students will be enrolled at KCMC and one at ORCI.  
54 They will additionally conduct 3 months of academic work each year in Denmark. The project  
55 will be performed as a twinning arrangement where the Tanzanian and the Danish PhD  
56 students will work closely together. To increase the expertise within HPV epidemiology and  
57 HPV testing in Tanzania and thereby increase the sustainability of the project outcomes, a  
58 post-doctoral fellow, Crispin Kahesa (CK), who has obtained his PhD as part of our previous  
59 research (2-6, 9) and who is presently acting as national trainer for the cervical cancer  
60

1  
2 prevention program in Tanzania, will be employed in the project. He will be visiting Institute of  
3 Medical Virology at Tuebingen University in Germany to get detailed knowledge about HPV  
4 testing and HPV analyses. In addition, to enhance local expertise in cervical cancer screening  
5 and HPV testing, a faculty exchange to the International Agency for Research on Cancer  
6 (IARC) in Lyon will also be arranged. Finally, to further upgrade CK's academic skills he will be  
7 involved as a co-supervisor of the two PhD projects focusing on Cervical Cancer Screening and  
8 Continuity of Care and write two independent papers based on the research findings.  
9

10 Ethical research permissions will be obtained from the Ministry of Health in Tanzania and from  
11 local authorities in Dar es Salaam and Kilimanjaro. Ethical clearance will be obtained from the  
12 Ethical Review Board at KCMC and ORCI as well as from the Ethical Review Board of the  
13 National Institute of Medical Research. The project will follow the international ethical  
14 guidelines developed by CIOMS (Council for International Organization of Medical Sciences),  
15 placing particular emphasis on ensuring participant safety. Hence, women who have a positive  
16 cytology (HSIL or worse) will be called in and treated according to Tanzanian standard of care.  
17 Similarly, women who are persistently HPV positive will be traced, and liquid-based cytology  
18 samples will be obtained and analyzed. In case of a positive cytology result (HSIL or worse),  
19 the women will be offered colposcopy directed biopsies and treatment according to the cervical  
20 cancer screening national guidelines. Informed written consent will be obtained from research  
21 participants and confidentiality guaranteed. The trial will be registered at ClinicalTrials.gov and  
22 trial analyses and reports will be made in accordance with CONSORT requirements. It is an  
23 important part of the study that all women will have a cytology examination when they exit the  
24 study after 26 months and we will make sure that all women are cared for in the best possible  
25 way.  
26  
27  
28

#### 29 **4. Expected outputs and outcomes**

30 The project will produce 4 PhD theses, at least 14 scientific papers published in international,  
31 peer-reviewed journals, at least 5 articles published in popular journals/magazines, at least 6  
32 conference papers (4 national and 2 international), and a minimum of 12 research updates and  
33 policy briefs.  
34

35 The expected outcomes of the project are:

- 37 • New knowledge about the natural history of HPV infection and consequences of HPV  
38 infection among HIV positive and HIV negative women
- 39 • New approaches in performing cervical cancer screening. On the basis of the research,  
40 possible improvements of the screening program will be identified, with a particular view to  
41 implementation of HPV testing and improved continuity of care.
- 42 • A cadre of health staff and community health workers who are trained in cervical cancer  
43 control and prevention and who through an improved communication line will help facilitate  
44 on-going care and treatment to women who are screened positive
- 45 • Improved capacities among researchers to conduct interdisciplinary and internationally  
46 informed research on primary and secondary prevention of cervical cancer
- 47 • Decreased mortality from cervical cancer due to detection of precancerous lesions and  
48 earlier detection of cervical cancer
- 49 • Reduced poverty through enhancement of women's sexual and reproductive health. To a  
50 high degree cervical cancer is diagnosed in women at reproductive age and is thus leading  
51 to high numbers of premature deaths with substantial social and economic consequences at  
52 an individual level and in society. Prevention of cervical cancer will therefore have an impact  
53 on reduction of poverty and sustainable development in society.  
54  
55

#### 56 **5. Relevance**

57 In Tanzania, cervical cancer is the commonest type of cancer in women, and that with the  
58 highest mortality rate. Annually, approximately 7300 new cases are diagnosed and about  
59 4200 women die from cervical cancer(11). Thus cervical cancer is a public health problem that  
60 has enormous social and economic population impact as it often affects women at reproductive

age(12). To address this public health problem, the project will provide new and important information on the natural history of HPV and how it relates to HIV, information that will be of help in the development of more efficient vaccines and screening strategies that targets HIV positive and HIV negative women. The project also aims to evaluate *CareHPV* testing (a simple to do test) as a tool for cervical cancer screening and to examine how continuity of care of women who are screened positive can be improved by two simple low cost interventions. The information generated from the project will help inform the future screening strategy in Tanzania as well as in other countries with high HIV prevalence. We will make it a priority that beside the publication of our results in scientific journals, we will communicate the results to decision makers, stakeholders and to the general population. The focus areas of our research, HPV, HIV and cervical cancer are well in line with the "Tanzanian National Health Research Policy" from 2013 that lists Communicable diseases, Non-communicable diseases and Reproductive health as top-three priority areas. Our research areas are also aligned with the Tanzanian Health Sector Strategic Plan III (HSSP III 2009-2015), supported by Danida, which also lists reproductive health and communicable and non-communicable diseases as priority areas. The project does also have relevance in relation to overall objectives and priorities of Danish development cooperation as expressed in The Right to a Better Life which states that "Denmark will be at the forefront of international efforts to promote sexual and reproductive health and rights, and in the fight against HIV/AIDS". Finally, through the linkage with KCMC, the activities are also in line with Danida priorities for research capacity building, since KCMC is one of the core institutions in the Building Stronger University (BSU) program.

## 6. Project plan

Since the project plan is complex and dynamic with interactions between multiple WPs, the key priorities will be to facilitate the necessary interactions between the WPs and to maintain the overall scientific direction over the life of the project. The project will start in January 2015 and end in December 2019. The existing ORCI and KCMC institutional bank accounts will be used for the project; and the existing financial and procurement regulations will be used for implementing the project in Tanzania. The main project milestones and timetable are shown on **Fig. 3**. The detailed budget is attached in the main application and it shows how the resource allocation in the project will be distributed between the institutions involved over the project period.

## 7. Participants, organization and management

**Julius Mwaiselage** is a medical doctor and epidemiologist and public health specialist. He is the Director of Cancer Prevention Services at ORCI. He has 9 years experiences in cancer epidemiological research in Tanzania and has been involved in various collaborative research projects focusing on HPV prevalence, cervical cancer screening and HPV vaccine introduction in Tanzania. He has authored more than 20 scientific papers in peer-reviewed journals and supervised 3 PhD students and more than 15 master's students. **Vibeke Rasch** is a gynaecologist and professor in global reproductive health. She has almost 20 years experiences in reproductive health research in Tanzania, has acted as principal responsible party in an enhancing research capacity building project in Vietnam and has been member of the BSU steering committee. She has authored more than 100 scientific publications and supervised 16 PhD students, more than half from sub-Saharan Africa and Asia. **Susanne Krüger Kjær** is a medical doctor and professor of cancer epidemiology. Her main research areas are HPV and cancer and the importance of gene-environment interactions in cancer development with a focus on clinical utility and the translational aspect. She has authored more than 350 scientific papers, and she is the Danish primary investigator on the clinical, randomised trials of the efficacy of HPV vaccination. She has supervised more than 25 Phd students. **Twalib Ngoma** is a professor of oncology. He has more than 25 years of experience in teaching, clinical work and research related to cancer. He is the executive director of ORCI and the head of clinical oncology department of Muhimbili University College of Health and Allied Science. **Rachel Manongi** is Head of Community Medicine Department at KCMC, she has a record of community based research with a special focus on HIV prevention and sustainable health promotion and has also been active in the establishment of a cervical cancer registry at KCMC. She has authored more than 40 papers in international journals.

1  
2  
3 The project builds on and extends existing collaboration between these Tanzanian and Danish  
4 researchers. The involved Danish researchers have solid experience in research capacity  
5 building in Tanzania and in HPV research and both have strong publication records. The  
6 proposed project will be undertaken in close coordination with the research capacity building  
7 activities conducted within the BSU initiative. The overall responsibility for the project lies with  
8 the main Tanzanian applicant. To facilitate cross-country project management, a Steering  
9 Board will be established between Tanzanian and Danish collaborators. A project management  
10 unit(PMU) will be established at ORCI. The PMU will consist of a project secretary and an  
11 accountant and will be responsible for day-to-day activities. To monitor the activities, a web-  
12 based project management tool will be established. The web tool will include detailed updated  
13 work plans linked to the work packages so partners can track project progress. Project  
14 documents will be available on the web-site. Members of the Steering Board will meet on a  
15 regular basis to ensure a continuous progress of the study. In addition, annual workshop  
16 meetings will be held with representatives from the partner institutions.

### 17 18 19 **8. Project's international dimension**

20 There is a great international interest in cervical cancer prevention focusing on different  
21 screening modalities, HPV testing and HPV vaccination, and it is one of the areas where  
22 substantial progress has been made in recent years and it is also one of the areas where  
23 research has the greatest translational potential. The suggested project relies heavily on  
24 collaboration between researchers in Tanzania, Denmark, Germany and France who have  
25 strong expertise in HPV epidemiology, HPV testing technology, cervical cancer screening  
26 approaches, and international health. Through this international collaboration, we will obtain a  
27 strong and valuable synergy. By means of this project there will be a great opportunity for  
28 transfer of knowledge and technology to Tanzania, which in a longer perspective may be  
29 further transferred to neighbouring sub-Saharan African countries with similar high prevalence  
30 rates of HPV and HIV.

### 31 32 33 **9. New knowledge**

34 Virtually all cases of cervical cancers and high-grade precursor lesions are caused by a  
35 persistent infection with HPV(13). Although effective prophylactic vaccines against HPV have  
36 been developed, they are still relatively expensive and logistically demanding as they currently  
37 require a 3-dose regimen. Furthermore, they do not treat already existing HPV infections and  
38 related diseases. Several African cross-sectional studies of the prevalence of HPV have been  
39 performed, including our own from Tanzania where we found an HPV prevalence of 20.1%  
40 among 3700 women(2). In the same study we found that 9.3% of the women were HIV  
41 positive. In contrast, only few prospective studies on HPV epidemiology have been conducted  
42 in Africa. Of these, some had a limited sample size (14), some did only include HIV negative  
43 women(9) or exclusively used self-sampled cervical swabs(15). In spite of the fact that  
44 cervical cancer is the most common malignancy among women in Sub-Saharan Africa(1), little  
45 is known about the distribution of HPV types, independent risk factors of incidence and  
46 patterns of persistence for different HPV types. Even though HPV16 has been found to be  
47 common in sub-Saharan African women, some studies have reported HPV52 and HPV58 to be  
48 more prevalent(2). Data on which HPV types are more likely to persist in relation to HIV status  
49 are scarce, particularly in HIV positive individuals. Results from the proposed study will add  
50 important information to our knowledge about the natural history of HPV in an HIV high-risk  
51 area and will be helpful in tailoring screening programs to match the needs of HIV positive and  
52 HIV negative women.

53  
54  
55 The conventional cytology screening (Pap smear followed by colposcopically-directed biopsies)  
56 demands costly cytology laboratories with skilled and highly experienced personnel, and  
57 multiple visits at regular intervals are needed. Consequently, the Pap smear screening is  
58 neither sufficiently developed nor sustainable in less developed countries(16). Therefore, cost  
59 effective methods such as VIA have been adopted in several countries for early detection of  
60 precancerous lesions. In 2002 cervical cancer screening based on VIA was implemented at

ORCI and the program has subsequently been scaled up to cover other regions in Tanzania. However, several studies, including our own recent study, have found VIA to have a limited sensitivity(4). In contrast, HPV screening is appealing due to a higher sensitivity and a higher negative predictive value(17). However, successful HPV screening in countries with limited resources requires a simple HPV test that will perform well also in remote areas and which is affordable. Finally, self-sampling will most likely be needed to make screening practical in some settings. . In relation to these issues, our study will contribute new knowledge which can immediately be used and implemented to the benefit of the women.

A successful programme for cervical cancer prevention requires function in its entirety. The programme should ensure high levels of screening coverage of the target population, offer high quality services, have good referral systems that guarantee patient follow-up and make certain that women receive appropriate treatment. Experiences from Tanzania mainland have documented that these preconditions are often not adhered to due to a poor functioning health system and as a consequence the screening results are often not conveyed and proper action not always taken. Currently, there is no mechanism in place in Tanzania to help women navigate between the potential barriers, which may be hindering factors for obtaining confirmatory diagnosis and adequate treatment of cervical precancerous lesions. Mobile Health, which implies the use of mobile communication devices for health care, is seen as a complementary strategy for strengthening health systems and the use of SMS has successfully been used to remind patients to take drugs and attend appointment e.g.in Kenya(18). Similarly, members of our research team have documented the effect of SMS on antenatal care attendance and skilled delivery attendance in Tanzania(7).The Patient Navigation Model is an alternative approach to enhance continuity of care among underserved populations. The navigators can be trained community health workers or peer educators who provide support and guidance (19). Patient navigation is used as a standard of care in most of Western oncological departments and has been proven to be successful in several studies e.g: Cancer control among urban African American (20) and Breast cancer screening(21). Understanding the acceptance of these two proposed models among Tanzanian women detected to have HPV will help health care professionals to develop more effective continuum of care programs by promoting attendance to HPV screening and follow-up of disease progression.

#### **10. Publication and dissemination strategy**

The research findings will be communicated via a project website, scientific paper in peer-reviewed journals and popular articles. Further to get maximum impact of the findings, a stakeholder workshop focusing on cervical cancer screening and continuity of care will be held at the beginning and at the end of the project. The invitees will include Women's groups representatives, civil society, health care providers, health sector officials and researchers. The workshop will involve stakeholders in the formulation of intervention strategies, which will enhance continuity of care among women who are screened positive. Further, at the end of the project period a policy brief workshop facilitated by a communication expert will be held and will result in the formulation of a policy brief that summarizes the research findings and provides recommendations to decision makers. The policy brief will be produced and shared at a national dissemination seminar where health policy makers, Danida representatives and other relevant stakeholder are invited.

#### **11. Strategy for phasing out of the project**

The project will be undertaken in cooperation with Ministry of Health officials and with health system representatives. Based on the research conducted within each work package, concrete recommendations for improved cervical cancer prevention will be developed and shared with health policy makers and other stakeholders. Since the PI is Director of Cancer Preventive service in Tanzania at ORCI and a member of the Ministry of Health technical working group for cervical cancer prevention and control in Tanzania, he will ensure the recommendations of the project are sent to the respective authorities and implemented. Initially most of the technical recommendations from the project will be implemented at ORCI, KCMC and among cervical cancer screening implementing partners in Tanzania after update of the cervical cancer



screening national service delivery guidelines. Furthermore, through a phased and participatory approach, the policy recommendations for the Ministry of Health, will be discussed at the relevant level of authority in order to ensure the updated policy guidelines and ministerial circulars for cervical cancer include the project recommendations on improvement, particularly on continuity of care. The Tanzanian post-doctoral and PhD students will be in the forefront in the implementation and sustainability of the comprehensive cervical cancer prevention in Tanzania given the knowledge and skills obtained in the project; and it is anticipated that they will be employed by ORCI and KCMC or even at the Ministry of Health. The established cohort of HPV positive women will be kept and maintained at ORCI for future studies on HPV persistence and clearance patterns and women's absolute risk of subsequently developing precancerous lesions (17).

**Fig. 1: Natural history of human papillomavirus (HPV) infection and cervical precancerous lesions**

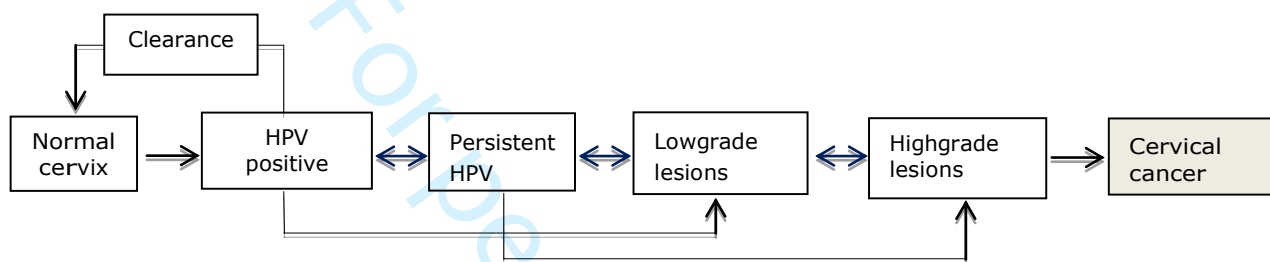

**Fig 2: The schematic overview of the study design**

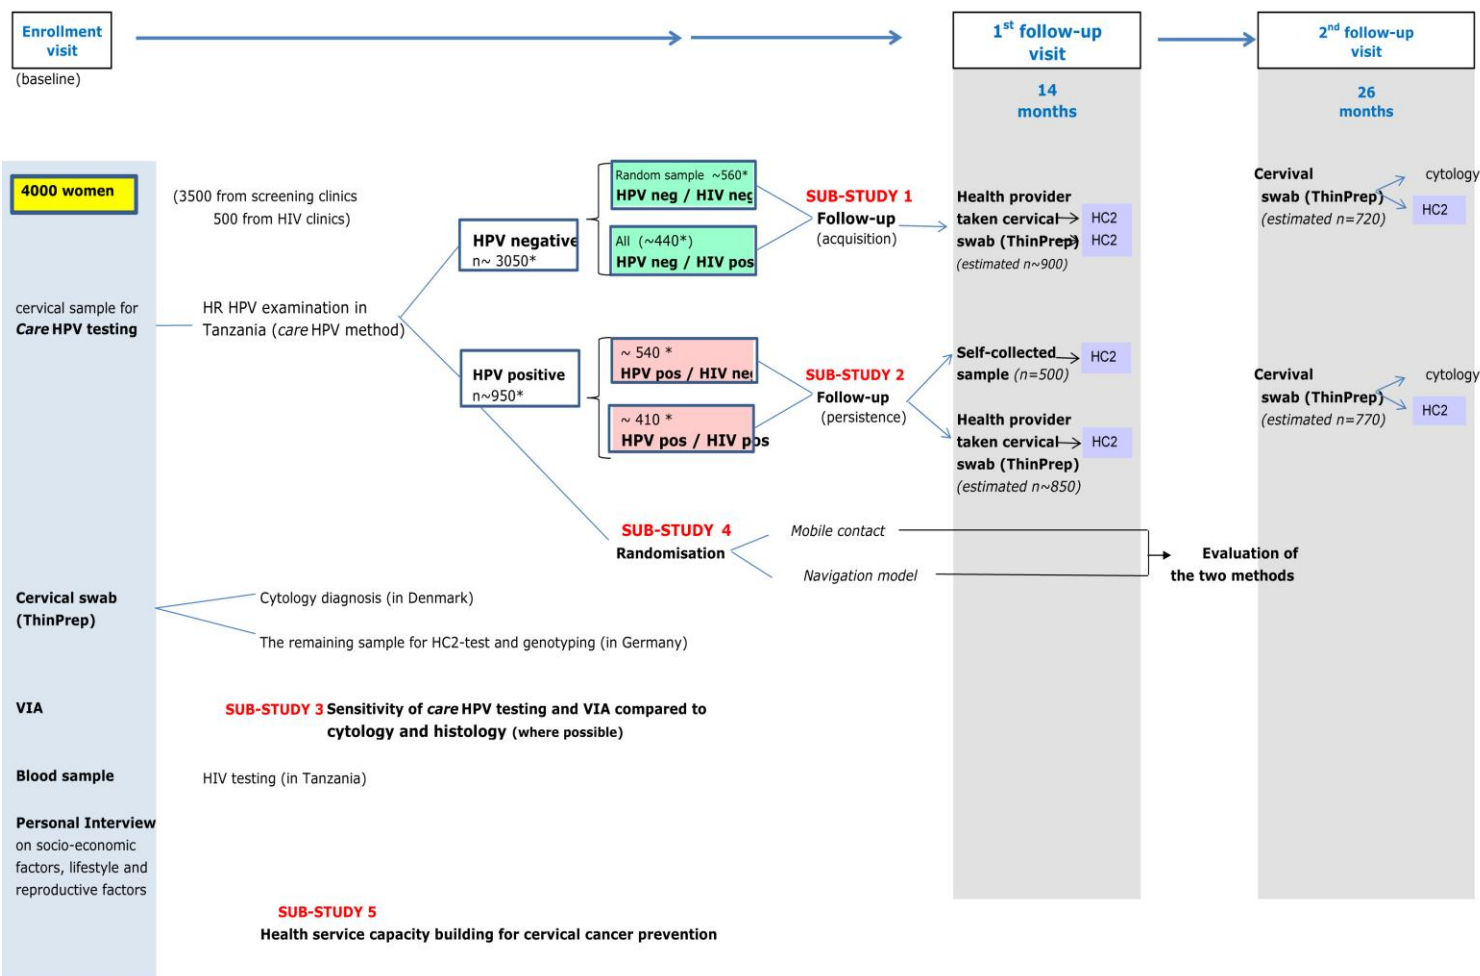

\* numbers estimated on the basis of recent finding in Tanzania (Dartell et al)

**Fig 3: The schematic overview of the project milestones and timetable**

| FIG 3: THE SCHEMATIC OVERVIEW OF THE PROJECT MILESTONES AND TIMETABLE                                                                                                                                                                                                                                                                                        |        |        |          |          |          |       |       |       |            |            |            |            |            |            |             |            |            |            |            |            |               |  |
|--------------------------------------------------------------------------------------------------------------------------------------------------------------------------------------------------------------------------------------------------------------------------------------------------------------------------------------------------------------|--------|--------|----------|----------|----------|-------|-------|-------|------------|------------|------------|------------|------------|------------|-------------|------------|------------|------------|------------|------------|---------------|--|
| MILESTONES                                                                                                                                                                                                                                                                                                                                                   | 2015   |        |          |          | 2016     |       |       |       | 2017       |            |            |            | 2018       |            |             |            | 2019       |            |            |            | Work packages |  |
|                                                                                                                                                                                                                                                                                                                                                              | Q1     | Q2     | Q3       | Q4       | Q1       | Q2    | Q3    | Q4    | Q1         | Q2         | Q3         | Q4         | Q1         | Q2         | Q3          | Q4         | Q1         | Q2         | Q3         | Q4         |               |  |
| Project commencement                                                                                                                                                                                                                                                                                                                                         | Yellow | Yellow |          |          |          |       |       |       |            |            |            |            |            |            |             |            |            |            |            |            | WP1,2,3,4,5   |  |
| Announcement and recruitment of PhD students                                                                                                                                                                                                                                                                                                                 | Green  | Green  |          |          |          |       |       |       |            |            |            |            |            |            |             |            |            |            |            |            | WP1,2,3,4     |  |
| Enrollment of PhD students into universities                                                                                                                                                                                                                                                                                                                 |        |        | Blue     |          |          |       |       |       |            |            |            |            |            |            |             |            |            |            |            |            | WP1,2,3,4     |  |
| PhD students attending university PhD program                                                                                                                                                                                                                                                                                                                |        |        |          | Brown    | Brown    | Brown | Brown | Brown | Brown      | Brown      | Brown      | Brown      | Brown      | Brown      | Brown       | Brown      |            |            |            |            | WP1,2,3,4     |  |
| Establishment of research sites                                                                                                                                                                                                                                                                                                                              |        |        | Blue     | Blue     |          |       |       |       |            |            |            |            |            |            |             |            |            |            |            |            | WP1,2,3,4     |  |
| Recruitment and training of research assistants                                                                                                                                                                                                                                                                                                              |        |        | Yellow   |          |          |       |       |       |            |            |            |            |            |            |             |            |            |            |            |            | WP1,2,3,4     |  |
| Data and specimen collection in Tanzania                                                                                                                                                                                                                                                                                                                     |        |        | Red      | Red      | Red      | Red   | Red   | Red   | Red        | Red        | Red        | Red        | Red        | Red        | Red         | Red        |            |            |            |            | WP1,2,3       |  |
| Randomization of women                                                                                                                                                                                                                                                                                                                                       |        |        | Dark Red | Dark Red | Dark Red |       |       |       |            |            |            |            |            |            |             |            |            |            |            |            | WP4           |  |
| Assessment of continuity of care among randomized women                                                                                                                                                                                                                                                                                                      |        |        |          |          |          |       |       |       | Pink       | Pink       | Pink       | Pink       |            |            |             |            |            |            |            |            | WP4           |  |
| Conducting PhD courses                                                                                                                                                                                                                                                                                                                                       |        |        |          |          |          | Blue  |       |       |            | Dark Blue  |            |            |            |            |             |            |            |            |            |            | WP5           |  |
| Postdoc fellow attached in research institution in France and Germany                                                                                                                                                                                                                                                                                        |        |        |          |          |          |       |       |       | Light Blue |            |            |            |            |            | Light Green |            |            |            |            |            | WP5           |  |
| Publications                                                                                                                                                                                                                                                                                                                                                 |        |        |          |          |          |       |       |       | Light Blue  | Light Blue | Light Blue | Light Blue | Light Blue | Light Blue | WP1,2,3,4,5   |  |
| PhD thesis submissions                                                                                                                                                                                                                                                                                                                                       |        |        |          |          |          |       |       |       |            |            |            |            |            |            |             |            | Brown      | Brown      |            |            | WP1,2,3,4     |  |
| Defence of PhD thesis                                                                                                                                                                                                                                                                                                                                        |        |        |          |          |          |       |       |       |            |            |            |            |            |            |             |            |            |            | Grey       | Grey       | WP1,2,3,4     |  |
| Dissemination of research findings                                                                                                                                                                                                                                                                                                                           |        |        |          |          |          |       |       |       |            |            |            |            |            |            |             |            |            |            |            | Light Blue | WP1,2,3,4,5   |  |
| Project completion and phasing out                                                                                                                                                                                                                                                                                                                           |        |        |          |          |          |       |       |       |            |            |            |            |            |            |             |            |            |            |            | Dark Grey  | WP1,2,3,4,5   |  |
| <p><b>Note:</b> Project commencement involves planning meeting of researchers, setting up of the project office, and ensuring ethical clearance is obtained from relevant bodies</p> <p><b>Note:</b> Project completion involves writing of the final project report, final auditing of the project, phasing out of the project to ensure sustainability</p> |        |        |          |          |          |       |       |       |            |            |            |            |            |            |             |            |            |            |            |            |               |  |

## 12. Main References

1. **Ferlay J**, Shin HR, Bray F, Forman D, Mathers C, Parkin DM. Estimates of worldwide burden of cancer in 2008: GLOBOCAN 2008. *International Journal of Cancer* 2010 Dec 15;127(12):2893-917.
2. **Dartell M**, Rasch V, Kahesa C, Mwaiselage J, Ngoma T, Junge J, et al. Human papillomavirus prevalence and type distribution in 3603 HIV-positive and HIV-negative women in the general population of Tanzania: the PROTECT study. *Sexually Transmitted Diseases*. 2012 Mar;39(3):201-8.
3. **Dartell M**, Rasch V, Munk C, Kahesa C, Mwaiselage J, Iftner T, et al. Risk factors for high-risk human papillomavirus detection among HIV-negative and HIV-positive women from Tanzania. *Sexually Transmitted Diseases*. 2013 Sep;40(9):737-43.
4. **Dartell MA**, Rasch V, Iftner T, Kahesa C, Mwaiselage JD, Junge J, et al. Performance of visual inspection with acetic acid and human papillomavirus testing for detection of high-grade cervical lesions in HIV positive and HIV negative Tanzanian women. *International Journal of Cancer* 2014 Jan 4. PubMed PMID: 24391021. Epub 2014/01/07. Eng.
5. **Kahesa C**, Kjaer S, Mwaiselage J, Ngoma T, Tersbol B, Dartell M, et al. Determinants of acceptance of cervical cancer screening in Dar es Salaam, Tanzania. *BMC Public Health*. 2012;12:1093.
6. **Kahesa C**, Kjaer SK, Ngoma T, Mwaiselage J, Dartell M, Iftner T, et al. Risk factors for VIA positivity and determinants of screening attendances in Dar es Salaam, Tanzania. *BMC Public Health*. 2012;12:1055. PubMed PMID: 23216752.
7. **Lund S**, Hemed M, Nielsen BB, Said A, Said K, Makungu MH, et al. Mobile phones as a health communication tool to improve skilled attendance at delivery in Zanzibar: a cluster-randomised controlled trial. *BJOG* 2012 Sep;119(10):1256-64. PubMed PMID: 22805598.
8. **Nielsen A**, Iftner T, Munk C, Kjaer SK. Acquisition of high-risk human papillomavirus infection in a population-based cohort of Danish women. *Sexually Transmitted Diseases* 2009 Oct;36(10):609-15.
9. **Fukuchi E**, Sawaya GF, Chirenje M, Magure T, Tuveson J, Ma Y, et al. Cervical human papillomavirus incidence and persistence in a cohort of HIV-negative women in Zimbabwe. *Sexually Transmitted Diseases*. 2009 May;36(5):305-11. PubMed PMID: 19295468.
10. **Olesen TB**, Iftner T, Mwaiselage J, Kahesa C, Rasch V, Ngoma T, et al. Prevalence and type distribution of human papillomavirus among 1813 men in Tanzania and the relationship to HIV status. *Sexually Transmitted Diseases*. 2013 Jul;40(7):592-8. PubMed PMID: 23965778. Epub 2013/08/24. eng.
11. Human Papillomavirus and Related Diseases in Tanzania. Summary Report [Internet]. ICO Information Centre on HPV and Cancer.
12. **Chokunonga E**, Borok MZ, Chirenje ZM, Nyakabau AM, Parkin DM. Trends in the incidence of cancer in the black population of Harare, Zimbabwe 1991-2010. *International Journal of Cancer* 2013 Aug 1;133(3):721-9. PubMed PMID: 23364833. Epub 2013/02/01. eng.
13. **Kjaer SK**, van den Brule AJ, Bock JE, Poll PA, Engholm G, Sherman ME, et al. Human papillomavirus-the most significant risk determinant of cervical intraepithelial neoplasia. *International Journal of Cancer* 1996 Mar 1;65(5):601-6.
14. **Veldhuijzen NJ**, Vyankandondera J, van de Wijgert JH. HIV acquisition is associated with prior high-risk human papillomavirus infection among high-risk women in Rwanda. *AIDS (London, England)*. 2010 Sep 10;24(14):2289-92. PubMed PMID: 20613457. Epub 2010/07/09. eng.
15. **Safaeian M**, Kiddugavu M, Gravitt PE, Gange SJ, Ssekasanvu J, Murokora D, et al. Determinants of incidence and clearance of high-risk human papillomavirus infections in rural Rakai, Uganda. *Cancer Epidemiology, Biomarkers & Prevention* 2008 Jun;17(6):1300-7.
16. **Denny L**. Cytological screening for cervical cancer prevention. *Best practice & research Clinical obstetrics & gynaecology*. 2012 Apr;26(2):189-96. PubMed PMID: 22071306. Epub 2011/11/11. eng.
17. **Kjaer SK**, Frederiksen K, Munk C, Iftner T. Long-term absolute risk of cervical intraepithelial neoplasia grade 3 or worse following human papillomavirus infection: role of persistence. *Journal of the National Cancer Institute*. 2010 Oct 6;102(19):1478-88. PubMed PMID: 20841605.
18. **Lester RT**, Ritvo P, Mills EJ, Kariri A, Karanja S, Chung MH, et al. Effects of a mobile phone short message service on antiretroviral treatment adherence in Kenya (WelTel Kenya1): a randomised trial. *Lancet*. 2010 Nov 27;376(9755):1838-45. PubMed PMID: 21071074.
19. **Honeycutt S**, Green R, Ballard D, Hermstad A, Brueder A, Haardorfer R, et al. Evaluation of a patient navigation program to promote colorectal cancer screening in rural Georgia, USA. *Cancer*. 2013 Aug 15;119(16):3059-66. PubMed PMID: 23719894.
20. **Halbert CH**, Briggs V, Bowman M, Bryant B, Bryant DC, Delmoor E, et al. Acceptance of a community-based navigator program for cancer control among urban African Americans. *Health education research*. 2014 Feb;29(1):97-108. PubMed PMID: 24173501.
21. **Lee JH**, Fulp W, Wells KJ, Meade CD, Calcano E, Roetzheim R. Patient navigation and time to diagnostic resolution: results for a cluster randomized trial evaluating the efficacy of patient navigation among patients with breast cancer screening abnormalities, Tampa, FL. *PloS one*. 2013;8(9):e74542. PubMed PMID:

1  
2  
3  
4  
5  
6  
7  
8  
9  
10  
11  
12  
13  
14  
15  
16  
17  
18  
19  
20  
21  
22  
23  
24  
25  
26  
27  
28  
29  
30  
31  
32  
33  
34  
35  
36  
37  
38  
39  
40  
41  
42  
43  
44  
45  
46  
47  
48  
49  
50  
51  
52  
53  
54  
55  
56  
57  
58  
59  
60

|                       |
|-----------------------|
| <hr/><br>Study number |
|-----------------------|

# Concept

## Comprehensive Prevention of Cervical Cancer in Tanzania

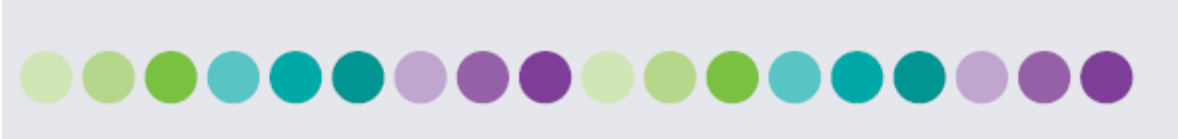

Study site: ORCI  KCMC  MAGOMENI  MAWENZI

Date \_\_\_\_\_ Study number \_\_\_\_\_

Health Provider Initials \_\_\_\_\_ Participant initials \_\_\_\_\_

## BACKGROUND

1.

How old are you?   years

2. Are you:

|                              |                            |
|------------------------------|----------------------------|
| Married, monogamous          | 1 <input type="checkbox"/> |
| Married, polygamous          | 2 <input type="checkbox"/> |
| Cohabiting                   | 3 <input type="checkbox"/> |
| Single, with regular partner | 4 <input type="checkbox"/> |
| Single, no regular partner   | 5 <input type="checkbox"/> |
| Divorced/ Widow              | 6 <input type="checkbox"/> |

How long have you known your husband / cohabiter / regular partner?

years   months

3. With whom are you presently living?

|                     |                            |
|---------------------|----------------------------|
| Husband / cohabiter | 1 <input type="checkbox"/> |
| Parents             | 2 <input type="checkbox"/> |
| Parents in law      | 3 <input type="checkbox"/> |
| Other relatives     | 4 <input type="checkbox"/> |
| Friends             | 5 <input type="checkbox"/> |
| Nobody              | 6 <input type="checkbox"/> |

1  
2  
3  
4  
5  
6  
7  
8  
9  
10  
11  
12  
13  
14  
15  
16  
17  
18  
19

4. What is the highest level of formal education you have completed?

|                        |                            |
|------------------------|----------------------------|
| No formal education    | 1 <input type="checkbox"/> |
| Standard 1-4           | 2 <input type="checkbox"/> |
| Standard 5-7           | 3 <input type="checkbox"/> |
| Form 1-4               | 4 <input type="checkbox"/> |
| Form 5-6               | 5 <input type="checkbox"/> |
| University/college     | 6 <input type="checkbox"/> |
| Other _____<br>Specify | 8 <input type="checkbox"/> |

20  
21  
22  
23

5. What is your religion?

|                        |                            |
|------------------------|----------------------------|
| Christian              | 1 <input type="checkbox"/> |
| Muslim                 | 2 <input type="checkbox"/> |
| Other _____<br>Specify | 3 <input type="checkbox"/> |

24  
25  
26  
27  
28  
29  
30  
31  
32  
33

**LIFESTYLE HABITS AND HEALTH**

34  
35  
36  
37  
38

6. Do you smoke cigarettes?

|                                 |                            |
|---------------------------------|----------------------------|
| Yes, every day                  | <input type="checkbox"/> 1 |
| Yes, at least once a week       | <input type="checkbox"/> 2 |
| Yes, but less than once a week  | <input type="checkbox"/> 3 |
| No, but I previously smoked     | <input type="checkbox"/> 4 |
| No, never → (go to question 11) | <input type="checkbox"/> 5 |

39  
40  
41  
42  
43  
44  
45  
46  
47  
48  
49  
50  
51  
52

7. How old were you, when you started to smoke cigarettes regularly?

(i.e. at least once a week)

age \_\_\_\_\_ years

53  
54  
55  
56  
57  
58  
59  
60

8. How many years have you smoked cigarettes regularly? (subtract periods of smoking cessation)

number of years: \_\_\_\_\_

1  
2  
3  
4 **9. If you are a current smoker, how much do you smoke on an average day?**

5  
6  
7  
8  
9  
10  
11  
12  
13  
14  
15  
16  
17  
18  
19  
20  
21  
22  
23  
24  
25  
26  
27  
28  
29  
30  
31  
32  
33  
34  
35  
36  
37  
38  
39  
40  
41  
42  
43  
44  
45  
46  
47  
48  
49  
50  
51  
52  
53  
54  
55  
56  
57  
58  
59  
60

number of cigarettes: \_\_\_\_\_

**10. If you no longer smoke cigarettes, how old were you when you stopped smoking?**

age \_\_\_\_\_ years

**11. Have you ever drunk alcohol and if yes, how old were you when you started drinking alcohol?**

| Have never been drinking                                     | 12 years or younger                   | 13-14 years                           | 15-16 years                           | 17-18 years                           | 19-20 years                           | 21 years or older                     |
|--------------------------------------------------------------|---------------------------------------|---------------------------------------|---------------------------------------|---------------------------------------|---------------------------------------|---------------------------------------|
| <input type="checkbox"/> <sub>1</sub><br>(Go to question 14) | <input type="checkbox"/> <sub>2</sub> | <input type="checkbox"/> <sub>3</sub> | <input type="checkbox"/> <sub>4</sub> | <input type="checkbox"/> <sub>5</sub> | <input type="checkbox"/> <sub>6</sub> | <input type="checkbox"/> <sub>7</sub> |

**12. How much per week do you usually drink of the following types of alcohol?**

|            |                                           |                      |
|------------|-------------------------------------------|----------------------|
| Beer       | No. of <u>glasses</u> per week on average | <input type="text"/> |
| Local brew | No. of <u>drinks</u> per week on average  | <input type="text"/> |
| Wine       | No. of <u>glasses</u> per week on average | <input type="text"/> |
| Liquor     | No. of <u>drinks</u> per week on average  | <input type="text"/> |

(1 bottle of wine = 6 glasses, 1 bottle of liquor = 20 drinks, 1 bottle of beer = 2 glasses)

**13. How many times per month on average do you have more than 6 drinks on the same occasion?**

| Never                                 | Less than once a <u>month</u>         | 1-3 times per <u>month</u>            | 4-8 times per <u>month</u>            | $\geq 9$ times per <u>month</u>       |
|---------------------------------------|---------------------------------------|---------------------------------------|---------------------------------------|---------------------------------------|
| <input type="checkbox"/> <sub>1</sub> | <input type="checkbox"/> <sub>2</sub> | <input type="checkbox"/> <sub>3</sub> | <input type="checkbox"/> <sub>4</sub> | <input type="checkbox"/> <sub>5</sub> |

**14. How do you regard your own health?**

|                                       |                                       |                                       |                                       |                                       |
|---------------------------------------|---------------------------------------|---------------------------------------|---------------------------------------|---------------------------------------|
| Excellent                             | Very good                             | Good                                  | Less good                             | Bad                                   |
| <input type="checkbox"/> <sub>1</sub> | <input type="checkbox"/> <sub>2</sub> | <input type="checkbox"/> <sub>3</sub> | <input type="checkbox"/> <sub>4</sub> | <input type="checkbox"/> <sub>5</sub> |

15. How do you perceive your body size?

|                            |                            |                            |                            |                            |
|----------------------------|----------------------------|----------------------------|----------------------------|----------------------------|
| Much too thick             | A little too thick         | Good                       | A little too thin          | Much too thin              |
| <input type="checkbox"/> 1 | <input type="checkbox"/> 2 | <input type="checkbox"/> 3 | <input type="checkbox"/> 4 | <input type="checkbox"/> 5 |

**REPRODUCTIVE HEALTH and SEXUAL HABITS**

16. Have you ever been pregnant?

|       |                                                |
|-------|------------------------------------------------|
| - yes | 1 <input type="checkbox"/>                     |
| - no  | 2 <input type="checkbox"/> → Go to question 17 |

**If yes:**

|                             |                        |
|-----------------------------|------------------------|
| Total number of pregnancies | 1 <input type="text"/> |
| Total number of births      | 2 <input type="text"/> |

How old were you at the first pregnancy?  years

How old were you when you gave birth to your first child?  years

17. Did you ever have a sexual partner?

|       |                                              |
|-------|----------------------------------------------|
| - yes | 1 <input type="checkbox"/>                   |
| - no  | 2 <input type="checkbox"/> Go to question 21 |

**If yes:**

How old were you at first intercourse?  years

How old was your first partner at that time?  years



1  
2  
3 **18. How many sexual partners did you have during your lifetime?**

|  |  |  |        |
|--|--|--|--------|
|  |  |  | number |
|--|--|--|--------|

4  
5  
6 **19. Did you have sexual intercourse within the last 12 months?**

|       |   |                          |
|-------|---|--------------------------|
| - yes | 1 | <input type="checkbox"/> |
| - no  | 2 | <input type="checkbox"/> |

7  
8  
9  
10  
11  
12  
13  
14  
15 **If yes:**

16 **How often have you used condoms during the last 12 months?**

|                                         |   |                          |
|-----------------------------------------|---|--------------------------|
| At every sexual intercourse             | 1 | <input type="checkbox"/> |
| Frequently but not at every intercourse | 2 | <input type="checkbox"/> |
| Rarely                                  | 3 | <input type="checkbox"/> |
| Only sexual intercourse without condoms | 4 | <input type="checkbox"/> |

17  
18  
19  
20  
21  
22  
23  
24  
25  
26  
27  
28  
29  
30  
31 **20. Is your husband / cohabiter / regular partner circumcised?**

|                                          |   |                          |
|------------------------------------------|---|--------------------------|
| Yes                                      | 1 | <input type="checkbox"/> |
| No                                       | 2 | <input type="checkbox"/> |
| No husband / cohabiter / regular partner | 3 | <input type="checkbox"/> |

32  
33  
34  
35  
36  
37  
38  
39  
40  
41  
42  
43  
44 **21. Has a doctor or other health care provider told you that you had genital warts (condyloma)?**

|       |   |                          |
|-------|---|--------------------------|
| - yes | 1 | <input type="checkbox"/> |
| - no  | 2 | <input type="checkbox"/> |

45  
46  
47  
48  
49  
50  
51  
52  
53  
54  
55 **If yes:**

56  
57  
58 **How old were you when you had genital warts for the first time?**

|  |  |
|--|--|
|  |  |
|--|--|

 years

Have you had genital warts in the last 12 months?

|       |   |                          |
|-------|---|--------------------------|
| - yes | 1 | <input type="checkbox"/> |
| - no  | 2 | <input type="checkbox"/> |

22. Have you ever been screened against cervical cancer?

|       |   |                          |
|-------|---|--------------------------|
| - yes | 1 | <input type="checkbox"/> |
| - no  | 2 | <input type="checkbox"/> |

**If yes:**

Has a doctor or other health care provider told you that you had precancerous lesions on the cervix?

|       |   |                          |                   |
|-------|---|--------------------------|-------------------|
| - yes | 1 | <input type="checkbox"/> |                   |
| - no  | 2 | <input type="checkbox"/> | Go to question 23 |

When did you have your last diagnose of precancerous lesions?

|  |  |
|--|--|
|  |  |
|--|--|

calendar month

|  |  |  |  |
|--|--|--|--|
|  |  |  |  |
|--|--|--|--|

calendar year

Which treatment did you receive?

|                |   |                          |
|----------------|---|--------------------------|
| - Cryo therapy | 1 | <input type="checkbox"/> |
| - LEEP         | 2 | <input type="checkbox"/> |
| - Don't know   | 3 | <input type="checkbox"/> |

23. Has a doctor or other health care provider told you that you had one of the following sexually transmitted diseases?

|                   |                                           |                                          |               |                                     |
|-------------------|-------------------------------------------|------------------------------------------|---------------|-------------------------------------|
| <b>Chlamydia</b>  | <sub>1</sub> <input type="checkbox"/> Yes | <sub>2</sub> <input type="checkbox"/> No | <b>If yes</b> | Age at first episode _____<br>Years |
| <b>Gonorrhoea</b> | <sub>1</sub> <input type="checkbox"/> Yes | <sub>2</sub> <input type="checkbox"/> No | <b>If yes</b> | Age at first episode _____<br>Years |
| <b>Syphilis</b>   | <sub>1</sub> <input type="checkbox"/> Yes | <sub>2</sub> <input type="checkbox"/> No | <b>If yes</b> | Age at first episode _____<br>Years |

24. Have you ever been tested for HIV?

|       |                                       |
|-------|---------------------------------------|
| - yes | <sub>1</sub> <input type="checkbox"/> |
| - no  | <sub>2</sub> <input type="checkbox"/> |

**If yes:**

**Have you ever tested positive?**

|       |                                       |                          |
|-------|---------------------------------------|--------------------------|
| - yes | <sub>1</sub> <input type="checkbox"/> |                          |
| - no  | <sub>2</sub> <input type="checkbox"/> | <b>Go to question 25</b> |

**If yes:**

**When did you test positive?**

calendar month

calendar year

**When did you have your last CD4 count test?**

*(If more than 6 months ago → refer the woman for a new test)*

calendar month

calendar year

**What was the result of the CD4 count? \_\_\_\_\_ number**

**Have you ever been started on ARV treatment?**

|       |   |                          |
|-------|---|--------------------------|
| - yes | 1 | <input type="checkbox"/> |
| - no  | 2 | <input type="checkbox"/> |

**If yes:**

**started when ?**

|                    |                                |                               |               |                                        |                                       |
|--------------------|--------------------------------|-------------------------------|---------------|----------------------------------------|---------------------------------------|
| <b>First line</b>  | 1 <input type="checkbox"/> Yes | 2 <input type="checkbox"/> No | <b>If yes</b> | <input type="text"/><br>calendar month | <input type="text"/><br>calendar year |
| <b>Second line</b> | 1 <input type="checkbox"/> Yes | 2 <input type="checkbox"/> No | <b>If yes</b> | <input type="text"/><br>calendar month | <input type="text"/><br>calendar year |
| <b>Third line</b>  | 1 <input type="checkbox"/> Yes | 2 <input type="checkbox"/> No | <b>If yes</b> | <input type="text"/><br>calendar month | <input type="text"/><br>calendar year |

**What is your CTC card number?**

\_\_\_\_\_  
Clinic name

\_\_\_\_\_  
Card number

**What is your CTC file number?**

\_\_\_\_\_  
File number

**If you do not know, can we call you and get the number?**

|       |   |                          |
|-------|---|--------------------------|
| - yes | 1 | <input type="checkbox"/> |
| - no  | 2 | <input type="checkbox"/> |

**TAARIFA KUHUSU SARATANI YA SHINGO YA KIZAZI***(KNOWLEDGE OF CERVICAL CANCER)***25. Sentensi zifuatazo zinahusu saratani ya shingo ya kizazi. Sema kweli au si kweli kwa kila sentensi***(Here are some statements about cervical cancer. I will ask you to answer which are true and which are false)*

|                                                                                                                                                                                                                         |                                |                                   |
|-------------------------------------------------------------------------------------------------------------------------------------------------------------------------------------------------------------------------|--------------------------------|-----------------------------------|
| <b>1. Malaria (mbu) inasababisha saratani ya shingo ya kizazi</b><br><i>(Malaria (mosquito) causes cervical cancer)</i>                                                                                                 | Kweli <input type="checkbox"/> | Si kweli <input type="checkbox"/> |
| <b>2. Kupata maumivu wakati wa kukojoa ni dalili ya saratani ya shingo ya kizazi</b><br><i>(Pain during urination can be a sign of cervical cancer)</i>                                                                 | Kweli <input type="checkbox"/> | Si kweli <input type="checkbox"/> |
| <b>3. Saratani ya shingo ya kizazi ndiyo inayoongoza kwa magonjwa ya kanza za wanawake hapa Tanzania</b><br><i>(Cervical cancer is the most common cancer disease among Tanzanian women)</i>                            | Kweli <input type="checkbox"/> | Si kweli <input type="checkbox"/> |
| <b>4. Unaweza kupata saratani ya shingo ya kizazi kwa kubusiana</b><br><i>(You can get cervical cancer from deep kissing)</i>                                                                                           | Kweli <input type="checkbox"/> | Si kweli <input type="checkbox"/> |
| <b>5. Inawezekana kujikinga na saratani ya shingo ya kizazi</b><br><i>(It is possible to prevent cervical cancer)</i>                                                                                                   | Kweli <input type="checkbox"/> | Si kweli <input type="checkbox"/> |
| <b>6. Kutokwa damu ukeni ni dalili kuu ya ugonjwa wa saratani ya shingo ya kizazi</b><br><i>(Vaginal bleeding is the most common sign of cervical cancer)</i>                                                           | Kweli <input type="checkbox"/> | Si kweli <input type="checkbox"/> |
| <b>7. Jua kali linaweza kusababisha saratani ya shingo ya kizazi</b><br><i>(Too much sun can lead to cervical cancer)</i>                                                                                               | Kweli <input type="checkbox"/> | Si kweli <input type="checkbox"/> |
| <b>8. Maambukizi ya kwenye shingo ya kizazi mara zote hubadilika kuwa saratani</b><br><i>(A cervical infection will always turn into cancer)</i>                                                                        | Kweli <input type="checkbox"/> | Si kweli <input type="checkbox"/> |
| <b>9. Wanawake wenye VVU wako kwenye hatari kubwa ya kupata saratani ya shingo ya kizazi</b><br><i>(HIV-positive women have higher risk of developing cervical cancer)</i>                                              | Kweli <input type="checkbox"/> | Si kweli <input type="checkbox"/> |
| <b>10. Saratani ya shingo ya kizazi mara nyingi hugundulika mapema kutokana na dalili zake</b><br><i>(Cervical cancer is often found at an early stage due to obvious symptoms)</i>                                     | Kweli <input type="checkbox"/> | Si kweli <input type="checkbox"/> |
| <b>11. Unaweza kupata saratani ya shingo ya kizazi kwa kujamiiana bila kinga</b><br><i>(You can get cervical cancer from unprotected sexual intercourse)</i>                                                            | Kweli <input type="checkbox"/> | Si kweli <input type="checkbox"/> |
| <b>12. Kupima afya kunaweza kugundua maambukizi ya kwenye shingo ya kizazi na kuyazuia yasibalike kuwa saratani</b><br><i>(Screening can detect cervical infections so they do not develop into cancer)</i>             | Kweli <input type="checkbox"/> | Si kweli <input type="checkbox"/> |
| <b>13. Saratani ya shingo ya kizazi inaongoza kwa kusababisha vifo vinavyotokana na saratani kwa wanawake hapa Tanzania</b><br><i>(Cervical cancer is the main cause of cancer-related death among Tanzanian women)</i> | Kweli <input type="checkbox"/> | Si kweli <input type="checkbox"/> |
| <b>14. Saratani ya shingo ya kizazi mara nyingi huwapata wanawake wakiwa kwenye miaka ya ishirini.</b><br><i>(Cervical cancer is most common for women in their 20's)</i>                                               | Kweli <input type="checkbox"/> | Si kweli <input type="checkbox"/> |
| <b>15. Kuwashwa ukeni kunaweza kuwa ni dalili ya saratani ya shingo ya kizazi</b><br><i>(Itchiness in the vaginal area can be a sign of cervical cancer)</i>                                                            | Kweli <input type="checkbox"/> | Si kweli <input type="checkbox"/> |
| <b>16. Kirusi kinachoitwa Human papilloma virus ndicho kisababishacho saratani ya shingo ya kizazi</b><br><i>(A virus called "Human papilloma virus" (HPV) causes cervical cancer)</i>                                  | Kweli <input type="checkbox"/> | Si kweli <input type="checkbox"/> |

**UKUBALI WA UJUMBE MFUPI KUPITIA SIMU YA MKONONI**  
(ACCEPTANCE OF MOBILE MESSAGES)

**UTANGULIZI (Introduction):**

*Kwenye utafiti huu wanawake watatakiwa kurudi baada ya miezi 14. Baadhi ya wanawake watatumiwa ujumbe kupitia simu ya mkononi wenye taarifa za afya na kukukumbusha siku ya kurudi kliniki. Nitakuuliza maswali machache kuhusu ujumbe wa kupitia simu ya mkononi*

*(In this study, all women will get a new appointment at the clinic after 14 months. However, some women will also receive health information and reminders of their appointment via sms. Here are some questions about mobile messages.)*

**26. Utajisikiaje ukipata ujumbe mfupi wenye taarifa kuhusu saratani ya shingo ya kizazi na upimaji wake kwenye simu yako au ya familia yako? (Chagua tabasamu sahihi kuonyesha utakavyojisikia)**

*(How do you feel about receiving health information and reminders of your appointment via sms on your or your family's mobile phone? Choose the one smiley that best shows how you feel)*

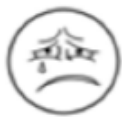

**Siipendi kabisa**  
*I do not like it at all*

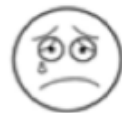

**Siipendi**  
*I do not like it*

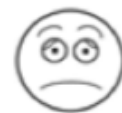

**Sio sawa**  
*It is not okay*

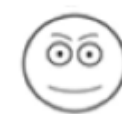

**Sawa**  
*It is okay*

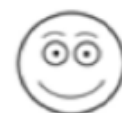

**Naipenda**  
*I like it*

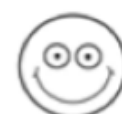

**Naipenda sana**  
*I like it very much*

1  
2  
3  
4  
5  
6  
7  
8  
9  
10  
11  
12  
13  
14  
15  
16  
17  
18  
19  
20  
21  
22  
23  
24  
25  
26  
27  
28  
29  
30  
31  
32  
33  
34  
35  
36  
37  
38  
39  
40  
41  
42  
43  
44  
45  
46  
47  
48  
49  
50  
51  
52  
53  
54  
55  
56  
57  
58  
59  
60

**27. Utajisikiaje ukipata ujumbe mfupi wenye taarifa kuhusu saratani ya shingo ya kizazi na upimaji wake kwenye simu yako au ya familia yako? (Weka alama ya mstari wima kuonyesha utakavyojisikia).**

*(How do you feel about receiving health information and reminders of your appointment via sms on your or your family's mobile phone? Make one vertical mark on the line similar to how you feel)*

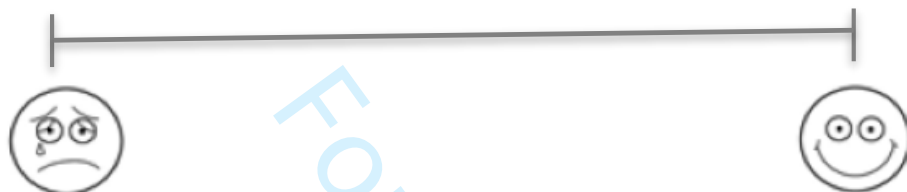

**Thanks a lot for your help**

**If there are any comments to add, please write them below**

---

---

---

---

---

1  
2  
3  
4  
5  
6  
7  
8  
9  
10  
11  
12  
13  
14  
15  
16  
17  
18  
19  
20  
21  
22  
23  
24  
25  
26  
27  
28  
29  
30  
31  
32  
33  
34  
35  
36  
37  
38  
39  
40  
41  
42  
43  
44  
45  
46  
47  
48  
49  
50  
51  
52  
53  
54  
55  
56  
57  
58  
59  
60

\_\_\_\_\_

Baseline Study number

\_\_\_\_\_

Follow-up Study number

# Concept

Comprehensive Prevention of Cervical Cancer in Tanzania

## FOLLOW-UP QUESTIONNAIRE

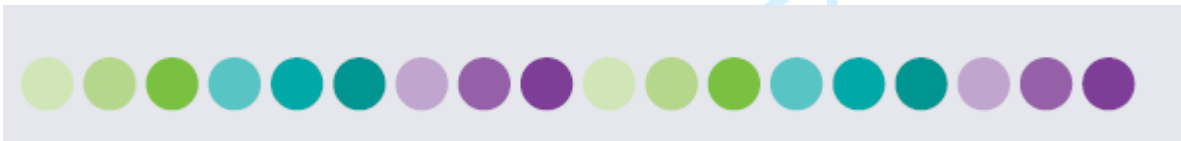



Study site: ORCI KCMC MAWENZI 

Date \_\_\_\_\_

Follow-up Study number \_\_\_\_\_

Baseline Study number \_\_\_\_\_

Health Provider Initials \_\_\_\_\_

Participant initials \_\_\_\_\_

**REPRODUCTIVE HEALTH and SEXUAL HABITS****1. Have you given birth since your last screening visit?**

|       |   |                                             |
|-------|---|---------------------------------------------|
| - yes | 1 | <input type="checkbox"/>                    |
| - no  | 2 | <input type="checkbox"/> → Go to question 2 |

**If yes:**

|                                              |   |                      |
|----------------------------------------------|---|----------------------|
| Total number of pregnancies since last visit | 1 | <input type="text"/> |
| Total number of births since last visit      | 2 | <input type="text"/> |

**2. Did you have a sexual partner since your last screening visit?**

|       |   |                                           |
|-------|---|-------------------------------------------|
| - yes | 1 | <input type="checkbox"/>                  |
| - no  | 2 | <input type="checkbox"/> Go to question 3 |

**If yes:****Have you had a new sexual partner since your last screening visit?**

|       |   |                          |
|-------|---|--------------------------|
| - yes | 1 | <input type="checkbox"/> |
| - no  | 2 | <input type="checkbox"/> |

How many sexual partners did you have since your last screening visit?

|  |  |  |        |
|--|--|--|--------|
|  |  |  | number |
|--|--|--|--------|

How often have you used condoms since your last screening visit?

|                                         |                            |
|-----------------------------------------|----------------------------|
| At every sexual intercourse             | 1 <input type="checkbox"/> |
| Frequently but not at every intercourse | 2 <input type="checkbox"/> |
| Rarely                                  | 3 <input type="checkbox"/> |
| Only sexual intercourse without condoms | 4 <input type="checkbox"/> |

3. Is your husband / cohabiter / regular partner circumcised?

|                                          |                            |
|------------------------------------------|----------------------------|
| Yes                                      | 1 <input type="checkbox"/> |
| No                                       | 2 <input type="checkbox"/> |
| No husband / cohabiter / regular partner | 3 <input type="checkbox"/> |

### Hormonal Family Planning

4. Have you ever used hormonal family planning methods?

|       |                            |                         |
|-------|----------------------------|-------------------------|
| - yes | 1 <input type="checkbox"/> |                         |
| - no  | 2 <input type="checkbox"/> | <b>Go to question 5</b> |

**If yes:**

**What type of hormonal contraceptives have you used?**

| Type                                       | No, never                  | Yes                        | If <u>yes</u> , how long have you used it overall? |                                                         |
|--------------------------------------------|----------------------------|----------------------------|----------------------------------------------------|---------------------------------------------------------|
| Birth control pills                        | 2 <input type="checkbox"/> | 1 <input type="checkbox"/> | <input type="text"/> <input type="text"/><br>years | and <input type="text"/> <input type="text"/><br>months |
| Birth control shot (Depo-provera)          | 2 <input type="checkbox"/> | 1 <input type="checkbox"/> | <input type="text"/> <input type="text"/><br>years | and <input type="text"/> <input type="text"/><br>months |
| Birth control implant (Implanon/ Nexoplan) | 2 <input type="checkbox"/> | 1 <input type="checkbox"/> | <input type="text"/> <input type="text"/><br>years | and <input type="text"/> <input type="text"/><br>months |
| Hormonal IUD (Mirena)                      | 2 <input type="checkbox"/> | 1 <input type="checkbox"/> | <input type="text"/> <input type="text"/><br>years | and <input type="text"/> <input type="text"/><br>months |

## HIV

**5. Have you tested positive for HIV since your last screening visit?**

|       |                            |                         |
|-------|----------------------------|-------------------------|
| - yes | 1 <input type="checkbox"/> |                         |
| - no  | 2 <input type="checkbox"/> | <b>Go to question 6</b> |

**If yes:**

**When did you test positive?**

 

calendar month

   

calendar year

**When did you have your last CD4 count test?**

*(If more than 6 months ago → refer the woman for a new test)*

 

calendar month

   

calendar year

**What was the result of the CD4 count? \_\_\_\_\_ number**

**Have you ever been started on ARV treatment?**

|       |                            |
|-------|----------------------------|
| - yes | 1 <input type="checkbox"/> |
| - no  | 2 <input type="checkbox"/> |

**If yes:**

**started when ?**

|                    |                                |                               |               |                                        |                                       |
|--------------------|--------------------------------|-------------------------------|---------------|----------------------------------------|---------------------------------------|
| <b>First line</b>  | 1 <input type="checkbox"/> Yes | 2 <input type="checkbox"/> No | <b>If yes</b> | <input type="text"/><br>calendar month | <input type="text"/><br>calendar year |
| <b>Second line</b> | 1 <input type="checkbox"/> Yes | 2 <input type="checkbox"/> No | <b>If yes</b> | <input type="text"/><br>calendar month | <input type="text"/><br>calendar year |
| <b>Third line</b>  | 1 <input type="checkbox"/> Yes | 2 <input type="checkbox"/> No | <b>If yes</b> | <input type="text"/><br>calendar month | <input type="text"/><br>calendar year |

**What is your CTC card number?**

\_\_\_\_\_

\_\_\_\_\_

Clinic name

Card number

**What is your CTC file number?**

\_\_\_\_\_

File number

**If you do not know, can we call you and get the number?**

|       |                            |
|-------|----------------------------|
| - yes | 1 <input type="checkbox"/> |
| - no  | 2 <input type="checkbox"/> |

**ATTENDANCE TO FOLLOW-UP APPOINTMENT**

**6. Which of following tools were most important for you to remember your appointment today? (choose one answer)**

|                                                              |                            |                         |
|--------------------------------------------------------------|----------------------------|-------------------------|
| I remembered from my appointment card and came to the clinic | 1 <input type="checkbox"/> | <b>Go to question 8</b> |
| I had a sms-reminder and came to the clinic                  | 2 <input type="checkbox"/> | <b>Go to question 8</b> |
| A nurse called me and told me to come to the clinic          | 3 <input type="checkbox"/> | <b>Go to question 7</b> |
| A nurse visited me at home and told me to come to the clinic | 4 <input type="checkbox"/> | <b>Go to question 7</b> |
| A nurse visited and we had the appointment at my home        | 5 <input type="checkbox"/> | <b>Go to question 7</b> |

1  
2  
3  
4  
5  
6  
7  
8  
9  
10  
11  
12  
13  
14  
15  
16  
17  
18  
19  
20  
21  
22  
23  
24  
25  
26  
27  
28  
29  
30  
31  
32  
33  
34  
35  
36

**7. What are the main reasons why you did not come to the clinic before the nurse contacted you?**

|                                                             |                                           |                                          |
|-------------------------------------------------------------|-------------------------------------------|------------------------------------------|
| I could not afford transportation on my own                 | Yes <sub>1</sub> <input type="checkbox"/> | No <sub>2</sub> <input type="checkbox"/> |
| I did not think the appointment was important               | Yes <sub>1</sub> <input type="checkbox"/> | No <sub>2</sub> <input type="checkbox"/> |
| I had forgotten                                             | Yes <sub>1</sub> <input type="checkbox"/> | No <sub>2</sub> <input type="checkbox"/> |
| I was nervous about the result of the screening             | Yes <sub>1</sub> <input type="checkbox"/> | No <sub>2</sub> <input type="checkbox"/> |
| I was nervous about having a gynaecological examination     | Yes <sub>1</sub> <input type="checkbox"/> | No <sub>2</sub> <input type="checkbox"/> |
| House chores prevented me from coming                       | Yes <sub>1</sub> <input type="checkbox"/> | No <sub>2</sub> <input type="checkbox"/> |
| The clinic is too far away from my home                     | Yes <sub>1</sub> <input type="checkbox"/> | No <sub>2</sub> <input type="checkbox"/> |
| Rainy season/ public holidays                               | Yes <sub>1</sub> <input type="checkbox"/> | No <sub>2</sub> <input type="checkbox"/> |
| My family does not know that I go, so I have to go secretly | Yes <sub>1</sub> <input type="checkbox"/> | No <sub>2</sub> <input type="checkbox"/> |
| I had my period                                             | Yes <sub>1</sub> <input type="checkbox"/> | No <sub>2</sub> <input type="checkbox"/> |
| I was pregnant                                              | Yes <sub>1</sub> <input type="checkbox"/> | No <sub>2</sub> <input type="checkbox"/> |
| I had moved                                                 | Yes <sub>1</sub> <input type="checkbox"/> | No <sub>2</sub> <input type="checkbox"/> |
| Other (please write) .....                                  |                                           |                                          |

37  
38  
39  
40  
41  
42  
43  
44  
45  
46  
47  
48  
49  
50  
51  
52  
53  
54  
55  
56  
57  
58  
59  
60

**HEALTH EDUCATION BY MOBILE PHONE**

(ELIMU YA AFIA QUA SIM)

**8. Have you received any text messages (sms) regarding cervical cancer and your screening appointment at the clinic?**

|       |                                       |                                           |
|-------|---------------------------------------|-------------------------------------------|
| - yes | <sub>1</sub> <input type="checkbox"/> |                                           |
| - no  | <sub>2</sub> <input type="checkbox"/> | <b>(Questionnaire is <u>finished</u>)</b> |

**If yes:**

**How do you like the number of messages that you received?**

|                             |                                       |
|-----------------------------|---------------------------------------|
| Too many messages           | <sub>1</sub> <input type="checkbox"/> |
| Adequate amount of messages | <sub>2</sub> <input type="checkbox"/> |
| Too few messages            | <sub>3</sub> <input type="checkbox"/> |

**How do you feel about the following statements? (If 'don't know' leave box empty)**

|                                                                                                    |                                           |                                          |
|----------------------------------------------------------------------------------------------------|-------------------------------------------|------------------------------------------|
| The information in the messages was easy to understand                                             | Yes <sup>1</sup> <input type="checkbox"/> | No <sup>2</sup> <input type="checkbox"/> |
| I did <i>not</i> need help from others to read the messages                                        | Yes <sup>1</sup> <input type="checkbox"/> | No <sup>2</sup> <input type="checkbox"/> |
| The information in messages made me uncomfortable                                                  | Yes <sup>1</sup> <input type="checkbox"/> | No <sup>2</sup> <input type="checkbox"/> |
| I know how to read text messages on my phone                                                       | Yes <sup>1</sup> <input type="checkbox"/> | No <sup>2</sup> <input type="checkbox"/> |
| I often send and receive text messages on my phone                                                 | Yes <sup>1</sup> <input type="checkbox"/> | No <sup>2</sup> <input type="checkbox"/> |
| I shared the health education that I got on my phone with friends or family                        | Yes <sup>1</sup> <input type="checkbox"/> | No <sup>2</sup> <input type="checkbox"/> |
| I would like to continue to receive health information by mobile phone                             | Yes <sup>1</sup> <input type="checkbox"/> | No <sup>2</sup> <input type="checkbox"/> |
| My husband or other family members was happy that I received health information on my mobile phone | Yes <sup>1</sup> <input type="checkbox"/> | No <sup>2</sup> <input type="checkbox"/> |
| I would recommend a friend or a family member to receive health education by mobile phone          | Yes <sup>1</sup> <input type="checkbox"/> | No <sup>2</sup> <input type="checkbox"/> |

**How do you feel about receiving health information and reminders of your appointment via sms on your mobile? (Choose the one smiley that best shows how you feel)**

*Utajisikiaje ukipata ujumbe mfupi wenye taarifa kuhusu saratani ya shingo ya kizazi na upimaji wake kwenye simu yako au? (Chagua tabasamu sahihi kuonyesha utakavyojisikia)*

-  *I do not like it at all*
-  *I do not like it*
-  *It is not okay*
-  *It is okay*
-  *I like it*
-  *I like it very much*

Here are some statements about cervical cancer. I will ask you to answer which are true and which are false? (*only for women that have received sms!*)

*Sentensi zifuatazo zinahusu saratani ya shingo ya kizazi. Sema kweli au si kweli kwa kila sentensi*

|                                                                                                                                                                                                           |                                |                                   |
|-----------------------------------------------------------------------------------------------------------------------------------------------------------------------------------------------------------|--------------------------------|-----------------------------------|
| 1. Malaria (mbu) inasababisha saratani ya shingo ya kizazi<br>(Malaria (mosquito) causes cervical cancer)                                                                                                 | Kweli <input type="checkbox"/> | Si kweli <input type="checkbox"/> |
| 2. Kupata maumivu wakati wa kukojoa ni dalili ya saratani ya shingo ya kizazi<br>(Pain during urination can be a sign of cervical cancer)                                                                 | Kweli <input type="checkbox"/> | Si kweli <input type="checkbox"/> |
| 3. Saratani ya shingo ya kizazi ndiyo inayoongoza kwa magonjwa ya kanza za wanawake hapa Tanzania<br>(Cervical cancer is the most common cancer disease among Tanzanian women)                            | Kweli <input type="checkbox"/> | Si kweli <input type="checkbox"/> |
| 4. Unaweza kupata saratani ya shingo ya kizazi kwa kubusiana<br>(You can get cervical cancer from deep kissing)                                                                                           | Kweli <input type="checkbox"/> | Si kweli <input type="checkbox"/> |
| 5. Inawezekana kujikinga na saratani ya shingo ya kizazi<br>(It is possible to prevent cervical cancer)                                                                                                   | Kweli <input type="checkbox"/> | Si kweli <input type="checkbox"/> |
| 6. Kutokwa damu ukeni ni dalili kuu ya ugonjwa wa saratani ya shingo ya kizazi<br>(Vaginal bleeding is the most common sign of cervical cancer)                                                           | Kweli <input type="checkbox"/> | Si kweli <input type="checkbox"/> |
| 7. Jua kali linaweza kusababisha saratani ya shingo ya kizazi<br>(Too much sun can lead to cervical cancer)                                                                                               | Kweli <input type="checkbox"/> | Si kweli <input type="checkbox"/> |
| 8. Maambukizi ya kwenye shingo ya kizazi mara zote hubadilika kuwa saratani<br>(A cervical infection will always turn into cancer)                                                                        | Kweli <input type="checkbox"/> | Si kweli <input type="checkbox"/> |
| 9. Wanawake wenye VVU wako kwenye hatari kubwa ya kupata saratani ya shingo ya kizazi<br>(HIV-positive women have higher risk of developing cervical cancer)                                              | Kweli <input type="checkbox"/> | Si kweli <input type="checkbox"/> |
| 10. Saratani ya shingo ya kizazi mara nyingi hugundulika mapema kutokana na dalili zake<br>(Cervical cancer is often found at an early stage due to obvious symptoms)                                     | Kweli <input type="checkbox"/> | Si kweli <input type="checkbox"/> |
| 11. Unaweza kupata saratani ya shingo ya kizazi kwa kujamiiana bila kinga<br>(You can get cervical cancer from unprotected sexual intercourse)                                                            | Kweli <input type="checkbox"/> | Si kweli <input type="checkbox"/> |
| 12. Kupima afya kunaweza kugundua maambukizi ya kwenye shingo ya kizazi na kuyazuia yasibalike kuwa saratani<br>(Screening can detect cervical infections so they do not develop into cancer)             | Kweli <input type="checkbox"/> | Si kweli <input type="checkbox"/> |
| 13. Saratani ya shingo ya kizazi inaongoza kwa kusababisha vifo vinavyotokana na saratani kwa wanawake hapa Tanzania<br>(Cervical cancer is the main cause of cancer-related death among Tanzanian women) | Kweli <input type="checkbox"/> | Si kweli <input type="checkbox"/> |
| 14. Saratani ya shingo ya kizazi mara nyingi huwapata wanawake wakiwa kwenye miaka ya ishirini.<br>(Cervical cancer is most common for women in their 20's)                                               | Kweli <input type="checkbox"/> | Si kweli <input type="checkbox"/> |
| 15. Kuwashwa ukeni kunaweza kuwa ni dalili ya saratani ya shingo ya kizazi<br>(Itchiness in the vaginal area can be a sign of cervical cancer)                                                            | Kweli <input type="checkbox"/> | Si kweli <input type="checkbox"/> |
| 16. Kirusi kinachoitwa Human papilloma virus ndicho kisababishacho saratani ya shingo ya kizazi<br>(A virus called "Humanpapiloma virus" (HPV) causes cervical cancer)                                    | Kweli <input type="checkbox"/> | Si kweli <input type="checkbox"/> |

1  
2  
3  
4  
5  
6  
7  
8  
9  
10  
11  
12  
13  
14  
15  
16  
17  
18  
19  
20  
21  
22  
23  
24  
25  
26  
27  
28  
29  
30  
31  
32  
33  
34  
35  
36  
37  
38  
39  
40  
41  
42  
43  
44  
45  
46  
47  
48  
49  
50  
51  
52  
53  
54  
55  
56  
57  
58  
59  
60

**Thanks a lot for your help**

**If there are any comments to add, please write them below**

---

---

---

---

For peer review only



STROBE Statement—Checklist of items that should be included in reports of *cohort studies*

|                              | Item No | Recommendation                                                                                                                                                                       | Response                                                                                                                                                                                                          |
|------------------------------|---------|--------------------------------------------------------------------------------------------------------------------------------------------------------------------------------------|-------------------------------------------------------------------------------------------------------------------------------------------------------------------------------------------------------------------|
| Title and abstract           | 1       | (a) Indicate the study's design with a commonly used term in the title or the abstract                                                                                               | Indicated as Cohort in all appropriate sections                                                                                                                                                                   |
|                              |         | (b) Provide in the abstract an informative and balanced summary of what was done and what was found                                                                                  | Indicated in the section "abstract"                                                                                                                                                                               |
| <b>Introduction</b>          |         |                                                                                                                                                                                      |                                                                                                                                                                                                                   |
| Background/rationale         | 2       | Explain the scientific background and rationale for the investigation being reported                                                                                                 | Explanation provided in the "Introduction" section                                                                                                                                                                |
| Objectives                   | 3       | State specific objectives, including any prespecified hypotheses                                                                                                                     | These has been provided in ll. "108-113"                                                                                                                                                                          |
| <b>Methods</b>               |         |                                                                                                                                                                                      |                                                                                                                                                                                                                   |
| Study design                 | 4       | Present key elements of study design early in the paper                                                                                                                              | Indicated in the sub section "study design and study population", ll. 117-143.                                                                                                                                    |
| Setting                      | 5       | Describe the setting, locations, and relevant dates, including periods of recruitment, exposure, follow-up, and data collection                                                      | Indicated in the sub sections "study design and study population", ll. 117-143; "assessment of exposure, ll. 147-195; "outcome measures; ll. 198-205; "table 1: Overview of data collected in the CONCEPT cohort" |
| Participants                 | 6       | (a) Give the eligibility criteria, and the sources and methods of selection of participants. Describe methods of follow-up                                                           | Indicated in the sub sections "study design and study population", ll. 117-143; "assessment of exposure, ll. 147-195; "outcome measures; ll. 198-205.                                                             |
|                              |         | (b) For matched studies, give matching criteria and number of exposed and unexposed                                                                                                  | NA - No matching was done                                                                                                                                                                                         |
| Variables                    | 7       | Clearly define all outcomes, exposures, predictors, potential confounders, and effect modifiers. Give diagnostic criteria, if applicable                                             | Indicated in the sub sections "assessment of exposure, ll. 147-195; "outcome measures; ll. 198-205                                                                                                                |
| Data sources/<br>measurement | 8*      | For each variable of interest, give sources of data and details of methods of assessment (measurement). Describe comparability of assessment methods if there is more than one group | Description of this item has been provided in table 1- Overview of data collection                                                                                                                                |
| Bias                         | 9       | Describe any efforts to address potential sources of bias                                                                                                                            | This has been described in section                                                                                                                                                                                |

|    |                        |     |                                                                                                                                                                                                   |
|----|------------------------|-----|---------------------------------------------------------------------------------------------------------------------------------------------------------------------------------------------------|
|    |                        |     | “What is being measured”                                                                                                                                                                          |
| 1  |                        |     |                                                                                                                                                                                                   |
| 2  | Study size             | 10  | Explain how the study size was arrived at                                                                                                                                                         |
| 3  | Quantitative variables | 11  | Explain how quantitative variables were handled in the analyses. If applicable, describe which groupings were chosen and why                                                                      |
| 4  |                        |     |                                                                                                                                                                                                   |
| 5  |                        |     |                                                                                                                                                                                                   |
| 6  |                        |     |                                                                                                                                                                                                   |
| 7  |                        |     |                                                                                                                                                                                                   |
| 8  |                        |     |                                                                                                                                                                                                   |
| 9  |                        |     |                                                                                                                                                                                                   |
| 10 | Statistical methods    | 12  | (a) Describe all statistical methods, including those used to control for confounding                                                                                                             |
| 11 |                        |     |                                                                                                                                                                                                   |
| 12 |                        |     |                                                                                                                                                                                                   |
| 13 |                        |     |                                                                                                                                                                                                   |
| 14 |                        |     |                                                                                                                                                                                                   |
| 15 |                        |     |                                                                                                                                                                                                   |
| 16 |                        |     |                                                                                                                                                                                                   |
| 17 |                        |     |                                                                                                                                                                                                   |
| 18 |                        |     |                                                                                                                                                                                                   |
| 19 |                        |     |                                                                                                                                                                                                   |
| 20 |                        |     |                                                                                                                                                                                                   |
| 21 |                        |     |                                                                                                                                                                                                   |
| 22 |                        |     |                                                                                                                                                                                                   |
| 23 |                        |     |                                                                                                                                                                                                   |
| 24 |                        |     |                                                                                                                                                                                                   |
| 25 |                        |     |                                                                                                                                                                                                   |
| 26 |                        |     |                                                                                                                                                                                                   |
| 27 |                        |     |                                                                                                                                                                                                   |
| 28 |                        |     |                                                                                                                                                                                                   |
| 29 |                        |     |                                                                                                                                                                                                   |
| 30 |                        |     |                                                                                                                                                                                                   |
| 31 |                        |     |                                                                                                                                                                                                   |
| 32 |                        |     |                                                                                                                                                                                                   |
| 33 |                        |     |                                                                                                                                                                                                   |
| 34 | <b>Results</b>         |     |                                                                                                                                                                                                   |
| 35 | Participants           | 13* | (a) Report numbers of individuals at each stage of study—eg numbers potentially eligible, examined for eligibility, confirmed eligible, included in the study, completing follow-up, and analysed |
| 36 |                        |     | (b) Give reasons for non-participation at each stage                                                                                                                                              |
| 37 |                        |     | (c) Consider use of a flow diagram                                                                                                                                                                |
| 38 |                        |     |                                                                                                                                                                                                   |
| 39 |                        |     |                                                                                                                                                                                                   |
| 40 |                        |     |                                                                                                                                                                                                   |
| 41 | Descriptive data       | 14* | (a) Give characteristics of study participants (eg demographic, clinical, social) and information on exposures                                                                                    |
| 42 |                        |     |                                                                                                                                                                                                   |

1  
2  
3  
4  
5  
6  
7  
8  
9  
10  
11  
12  
13  
14  
15  
16  
17  
18  
19  
20  
21  
22  
23  
24  
25  
26  
27  
28  
29  
30  
31  
32  
33  
34  
35  
36  
37  
38  
39  
40  
41  
42  
43  
44  
45  
46

|                          |     |                                                                                                                                                                                                              |                                                                                                                      |
|--------------------------|-----|--------------------------------------------------------------------------------------------------------------------------------------------------------------------------------------------------------------|----------------------------------------------------------------------------------------------------------------------|
|                          |     | and potential confounders                                                                                                                                                                                    | participants and their distribution has been provided in Table 2                                                     |
|                          |     | (b) Indicate number of participants with missing data for each variable of interest                                                                                                                          | Information on missing values has been provided for each variable in Table 2 & Table 3                               |
|                          |     | (c) Summarise follow-up time (eg, average and total amount)                                                                                                                                                  |                                                                                                                      |
| Outcome data             | 15* | Report numbers of outcome events or summary measures over time                                                                                                                                               | Table 2 and 3 provide a measure of important events at a baseline and follow-up                                      |
| Main results             | 16  | (a) Give unadjusted estimates and, if applicable, confounder-adjusted estimates and their precision (eg, 95% confidence interval). Make clear which confounders were adjusted for and why they were included | Table 3 provides Confidence interval of the important outcome measures at baseline and on follow up                  |
|                          |     | (b) Report category boundaries when continuous variables were categorized                                                                                                                                    |                                                                                                                      |
|                          |     | (c) If relevant, consider translating estimates of relative risk into absolute risk for a meaningful time period                                                                                             | NA                                                                                                                   |
| Other analyses           | 17  | Report other analyses done—eg analyses of subgroups and interactions, and sensitivity analyses                                                                                                               | NA                                                                                                                   |
| <b>Discussion</b>        |     |                                                                                                                                                                                                              |                                                                                                                      |
| Key results              | 18  | Summarise key results with reference to study objectives                                                                                                                                                     | NA. Cohort profile. However, summarized in “abstract”.                                                               |
| Limitations              | 19  | Discuss limitations of the study, taking into account sources of potential bias or imprecision. Discuss both direction and magnitude of any potential bias                                                   | Indicated in the section “Strengths and limitations, ll. 264-273                                                     |
| Interpretation           | 20  | Give a cautious overall interpretation of results considering objectives, limitations, multiplicity of analyses, results from similar studies, and other relevant evidence                                   | NA. Cohort profile                                                                                                   |
| Generalisability         | 21  | Discuss the generalisability (external validity) of the study results                                                                                                                                        | NA. Cohort profile. However, a the section “future plans”, ll. 276-284 indicates future perspectives for the cohort. |
| <b>Other information</b> |     |                                                                                                                                                                                                              |                                                                                                                      |
| Funding                  | 22  | Give the source of funding and the role of the funders for the present study and, if applicable, for the original study on which the present article is based                                                | Indicated in the section “financial disclosure, ll. 294-296.                                                         |

\*Give information separately for exposed and unexposed groups.

1 **Note:** An Explanation and Elaboration article discusses each checklist item and gives methodological background and published examples of transparent reporting. The STROBE checklist is  
2 best used in conjunction with this article (freely available on the Web sites of PLoS Medicine at <http://www.plosmedicine.org/>, Annals of Internal Medicine at <http://www.annals.org/>, and  
3 Epidemiology at <http://www.epidem.com/>). Information on the STROBE Initiative is available at <http://www.strobe-statement.org>.  
4  
5  
6  
7  
8  
9  
10  
11  
12  
13  
14  
15  
16  
17  
18  
19  
20  
21  
22  
23  
24  
25  
26  
27  
28  
29  
30  
31  
32  
33  
34  
35  
36  
37  
38  
39  
40  
41  
42  
43  
44  
45  
46

For peer review only

# BMJ Open

## Cohort profile: The comprehensive cervical cancer prevention in Tanzania (CONCEPT) study

|                                 |                                                                                                                                                                                                                                                                                                                                                                                                                                                                                                                                                                                                                                                                                                                                                                                                                                                                                                                                                                                                                                                                                                                                                                    |
|---------------------------------|--------------------------------------------------------------------------------------------------------------------------------------------------------------------------------------------------------------------------------------------------------------------------------------------------------------------------------------------------------------------------------------------------------------------------------------------------------------------------------------------------------------------------------------------------------------------------------------------------------------------------------------------------------------------------------------------------------------------------------------------------------------------------------------------------------------------------------------------------------------------------------------------------------------------------------------------------------------------------------------------------------------------------------------------------------------------------------------------------------------------------------------------------------------------|
| Journal:                        | <i>BMJ Open</i>                                                                                                                                                                                                                                                                                                                                                                                                                                                                                                                                                                                                                                                                                                                                                                                                                                                                                                                                                                                                                                                                                                                                                    |
| Manuscript ID                   | bmjopen-2020-038531.R1                                                                                                                                                                                                                                                                                                                                                                                                                                                                                                                                                                                                                                                                                                                                                                                                                                                                                                                                                                                                                                                                                                                                             |
| Article Type:                   | Cohort profile                                                                                                                                                                                                                                                                                                                                                                                                                                                                                                                                                                                                                                                                                                                                                                                                                                                                                                                                                                                                                                                                                                                                                     |
| Date Submitted by the Author:   | 16-May-2020                                                                                                                                                                                                                                                                                                                                                                                                                                                                                                                                                                                                                                                                                                                                                                                                                                                                                                                                                                                                                                                                                                                                                        |
| Complete List of Authors:       | Mchome, Bariki; Kilimanjaro Christian Medical Centre, Department of Obstetrics and Gynaecology<br>Swai, Patricia; Kilimanjaro Christian Medical Centre, Department of Obstetrics and Gynaecology<br>Wu, Chunsen; University of Southern Denmark, Department of Clinical Research; Odense Universitetshospital, Obstetrics and Gynaecology<br>Katanga, Johnson; Ocean Road Cancer Institute, Department for Cancer Prevention Services<br>Kahesa, C; Ocean Road Cancer Institute, Department for Cancer Prevention Services<br>Manongi, Rachel; Kilimanjaro Christian Medical College, Institute of Public Health<br>Mwaiselage, Julius; Ocean Road Cancer Institute, Department for Cancer Prevention Services<br>Kjaer, Susanne; Danish Cancer Society Research Center, Department of Virus, Lifestyle and Genes; Copenhagen University Hospital, Department of Gynaecology<br>Rasch, Vibeke; University of Southern Denmark, Department of Clinical Research; Odense Universitetshospital, Obstetrics and Gynaecology<br>Linde, Ditte ; University of Southern Denmark, Department of Clinical Research; Odense Universitetshospital, Obstetrics and Gynaecology |
| <b>Primary Subject Heading</b>: | Global health                                                                                                                                                                                                                                                                                                                                                                                                                                                                                                                                                                                                                                                                                                                                                                                                                                                                                                                                                                                                                                                                                                                                                      |
| Secondary Subject Heading:      | Oncology, Obstetrics and gynaecology, Public health, HIV/AIDS, Epidemiology                                                                                                                                                                                                                                                                                                                                                                                                                                                                                                                                                                                                                                                                                                                                                                                                                                                                                                                                                                                                                                                                                        |
| Keywords:                       | Gynaecological oncology < GYNAECOLOGY, PREVENTIVE MEDICINE, REPRODUCTIVE MEDICINE, International health services < HEALTH SERVICES ADMINISTRATION & MANAGEMENT, HIV & AIDS < INFECTIOUS DISEASES                                                                                                                                                                                                                                                                                                                                                                                                                                                                                                                                                                                                                                                                                                                                                                                                                                                                                                                                                                   |
|                                 |                                                                                                                                                                                                                                                                                                                                                                                                                                                                                                                                                                                                                                                                                                                                                                                                                                                                                                                                                                                                                                                                                                                                                                    |

SCHOLARONE™  
Manuscripts



I, the Submitting Author has the right to grant and does grant on behalf of all authors of the Work (as defined in the below author licence), an exclusive licence and/or a non-exclusive licence for contributions from authors who are: i) UK Crown employees; ii) where BMJ has agreed a CC-BY licence shall apply, and/or iii) in accordance with the terms applicable for US Federal Government officers or employees acting as part of their official duties; on a worldwide, perpetual, irrevocable, royalty-free basis to BMJ Publishing Group Ltd ("BMJ") its licensees and where the relevant Journal is co-owned by BMJ to the co-owners of the Journal, to publish the Work in this journal and any other BMJ products and to exploit all rights, as set out in our [licence](#).

The Submitting Author accepts and understands that any supply made under these terms is made by BMJ to the Submitting Author unless you are acting as an employee on behalf of your employer or a postgraduate student of an affiliated institution which is paying any applicable article publishing charge ("APC") for Open Access articles. Where the Submitting Author wishes to make the Work available on an Open Access basis (and intends to pay the relevant APC), the terms of reuse of such Open Access shall be governed by a Creative Commons licence – details of these licences and which [Creative Commons](#) licence will apply to this Work are set out in our licence referred to above.

Other than as permitted in any relevant BMJ Author's Self Archiving Policies, I confirm this Work has not been accepted for publication elsewhere, is not being considered for publication elsewhere and does not duplicate material already published. I confirm all authors consent to publication of this Work and authorise the granting of this licence.

# Cohort profile: The comprehensive cervical cancer prevention in Tanzania (CONCEPT) study

## Authors

Bariki Mchome<sup>a</sup>, Patricia Swai<sup>a</sup>, ChunsenWu<sup>b,c</sup>, Johnson Katanga<sup>d</sup>, Crispin Kahesa<sup>d</sup>, Rachel Manongi<sup>e</sup>, Julius Mwaiselage<sup>d</sup>, Susanne K. Kjaer<sup>f,g</sup>, Vibeke Rasch<sup>b,c</sup>, Ditte S. Linde<sup>b,c,h\*</sup>

<sup>a</sup>Department of Obstetrics and Gynaecology, Kilimanjaro Christian Medical Centre, Moshi, Tanzania.

Email: barikimchome@gmail.com; patriciaswai@yahoo.com

<sup>b</sup>Department of Clinical Research, University of Southern Denmark, Odense, Denmark. Email:

dsondergaard@health.sdu.dk; vrasch@health.sdu.dk

<sup>c</sup>Department of Obstetrics and Gynaecology, Odense University Hospital, Odense, Denmark. Email:

Chunsen.Wu@rsyd.dk

<sup>d</sup>Department for Cancer Prevention Services, Ocean Road Cancer Institute, Dar es Salaam, Tanzania. Email:

johnsonkatanga2013@gmail.com; crispinkahesa@yahoo.co.uk; jmwaiselage@yahoo.com

<sup>e</sup>Institute of Public Health, Kilimanjaro Christian Medical University College, Moshi, Tanzania. Email:

naeraheli@gmail.com

<sup>f</sup>Department of Virus, Lifestyle and Genes, Danish Cancer Society Research Center, Copenhagen, Denmark.

Email: susanne@cancer.dk

<sup>g</sup>Department of Gynaecology, Rigshospitalet University Hospital, Copenhagen, Denmark

<sup>h</sup>OPEN, Odense Patient Data Explorative Network, Odense University Hospital, Odense, Denmark

\*Corresponding author: Ditte S. Linde, Department of Clinical Research, University of Southern Denmark,

Denmark. Email: dsondergaard@health.sdu.dk

Word count: 3325

1  
2  
3  
4  
5  
6  
7  
8  
9  
10  
11  
12  
13  
14  
15  
16  
17  
18  
19  
20  
21  
22  
23  
24  
25  
26  
27  
28  
29  
30  
31  
32  
33  
34  
35  
36  
37  
38  
39  
40  
41  
42  
43  
44  
45  
46  
47  
48  
49  
50  
51  
52  
53  
54  
55  
56  
57  
58  
59  
60

## 26 **Abstract**

### 27 **Purpose**

28 Cervical cancer is a major cause of death among women in Eastern Africa, and the distribution of HPV in  
29 relation to HIV-status is inadequately characterised in this region. In order to guide future cervical cancer  
30 preventive strategies that involve HPV-testing, the Comprehensive Cervical Cancer Project in Tanzania  
31 (CONCEPT) study was established in 2015. The CONCEPT cohort aims to investigate the natural history of  
32 HPV and determine acquisition and persistence patterns of high-risk (HR) HPV– both group- and type-  
33 specific – among HIV-positive and -negative women. Further, the influence of lifestyle and  
34 sexual/reproductive factors will be investigated.

### 36 **Participants**

37 Women aged 25-60 years were enrolled from cervical cancer screening clinics in Dar-es-Salaam and Moshi,  
38 Tanzania. Data were collected at baseline, at 14 months (1<sup>st</sup> follow-up), and at 28 months (2<sup>nd</sup> follow-up).  
39 Biological samples included two cervical swabs for *care*HPV DNA-testing, cytology, Hybrid Capture 2,  
40 genotyping, and blood samples for HIV. Visual inspection with acetic acid was performed, and socio-  
41 demographic, lifestyle, and sexual/reproductive characteristics were collected through a standardised  
42 questionnaire.

### 44 **Findings to date**

45 4043 women were included in the cohort from August 2015 – May 2017. At baseline, 696 (17.1%) women  
46 were HR HPV-positive and among these 31.6% were HIV-positive; 139 women (3.4%) had high grade  
47 squamous intraepithelial lesions. 3074 women (81%) attended the 1<sup>st</sup> follow-up. The majority attended after  
48 receiving a phone call reminder (35%) or from home via self-samples (41%). At 1<sup>st</sup> follow-up, 438 (14.4%)  
49 were HR HPV-positive and 30.4% of these were HIV-positive.



1  
2  
3  
4 50

## 51 **Future plans**

52 A second follow-up is underway (17 December 2018 – October 2020). We plan to integrate our data with a  
53 previous cross-sectional HPV study from Tanzania to increase the power of our findings. Researchers  
54 interested in collaborating are welcomed, either by extracting data from or jointly requesting further  
55 investigation from the cohort.

## 57 **Registration**

58 ClinicalTrials.gov: NCT02509702 (CONCEPT sub-study).

## 60 **Strengths and limitations of this study**

- 61 • This is a large-scale longitudinal cervical cancer study conducted in an HIV endemic population that  
62 aims to address a major cause of disease among East-African women, which so far has not received  
63 much focus within global health research.
- 64 • Women are followed over a long duration of time and with a large amount of data being collected by  
65 use of questionnaires and lab tests.
- 66 • It was difficult to get women to return for follow-up screenings. However, carefully designed tracing  
67 plans and dedicated home-visiting staff entailed that we managed to attain an 81% participation rate  
68 at 1<sup>st</sup> follow-up.
- 69 • Detailed HIV documentation was challenging to obtain, which has limited our ability and power in  
70 analyses involving HIV immunologic markers and treatment.

51  
52 7153  
54 7255  
56  
57 73

58

59

60

## 74 Introduction

75 Cervical cancer is a major cause of cancer-related mortality and morbidity globally. The highest prevalence  
76 is found among women aged 45-60 years<sup>1</sup>, and the burden of disease is disproportionately distributed among  
77 low- and middle-income countries (LMIC) and high-income countries (HIC)— LMICs account for 80% of  
78 cervical cancer cases worldwide. The global age-standardised incidence rate for cervical cancer is 14 per  
79 100,000 women<sup>2</sup> while the incidence rate of cervical cancer is 42.7 per 100,000 women in East Africa<sup>3</sup> and  
80 54 per 100,000 women in Tanzania, specifically<sup>4</sup>. Major contributing factors to the high burden of disease in  
81 resource-limited settings includes low awareness of the disease and how to prevent it; unavailability of  
82 organised screening programmes; and use of visual inspection with acetic acid (VIA) as standard screening  
83 method which has shown to have low sensitivity when it is performed by unskilled health provider with  
84 inadequate supportive supervision<sup>5 6 7</sup>.

86 HPV is the most common sexually transmitted infection worldwide, and there is a 60-70% life-time risk of  
87 acquiring an HPV infection among sexually active women<sup>8</sup>. Eighty to 90% of HPV infections clear  
88 spontaneously, however 10-20% become persistent and can develop into pre-cancerous lesions and cervical  
89 cancer over time. There are different factors associated with HPV persistence, the two most significant ones  
90 are the type of HPV involved and immunodeficiency, hence HIV-positive women have increased risk of  
91 acquiring HPV<sup>9</sup> and for the infection to become persistent<sup>10 11</sup>. HPV16 and 18 are the two most important  
92 types as these are associated with approximately 70% of all invasive cervical cancers worldwide<sup>8</sup>. Globally,  
93 the five most common types are HPV16, 18, 52, 31, and 58<sup>5 6</sup>. However, cross-sectional studies from Africa  
94 and systematic reviews on the global HPV burden indicate that the type-specific prevalence of HPV differs  
95 in Africa compared to other regions<sup>2 12 13</sup>, specifically HPV 52, 58, 31, and 35 are more common in African  
96 countries compared to other parts of the world<sup>14-16</sup>. Further, sexual, reproductive, and lifestyle factors  
97 influence HPV acquisition and persistence, including smoking, high parity, number of sexual partners, long-  
98 term use of oral contraceptives, and co-infections with other sexually transmitted agents<sup>17 18</sup>. However to  
99 date, there are no adequately powered longitudinal HPV studies among middle-aged women in East Africa

1  
2  
3  
4 100 that explore the association of HIV, immunological factors, reproductive, and lifestyle factors on HR HPV  
5  
6 101 acquisition and persistence.  
7

8 102  
9  
10 103 To our knowledge, only two HPV cohort studies and one large HPV cross-sectional study have been  
11  
12 104 conducted in Africa, which explore the dynamics of HPV, HIV, and cervical cancer, namely (I) the HPV in  
13  
14 105 Africa Research Partnership (HARP) HPV Study in Burkina Faso and Tanzania<sup>19</sup>; (II) the African  
15  
16 106 Collaborative Center for Microbiome and Genomics Research (ACCME) study in Nigeria<sup>20</sup>; and (III) the  
17  
18 107 Prevention of Cervical Cancer in Tanzania (PROTECT) study<sup>21</sup>. Other studies are nested in HPV vaccine  
19  
20 108 trials<sup>22-24</sup>. These studies have provided some insight into the distribution of HPV among different African  
21  
22 109 populations, however, they were either cross-sectional or conducted among adolescents' with inadequately  
23  
24 110 powered HIV-positive women and with a relatively short duration of follow-up.  
25  
26  
27  
28

29 111  
30 112 The Comprehensive Cervical Cancer Prevention in Tanzania (CONCEPT) study was launched in 2015 with  
31  
32 113 an overall aim of improving prevention of cervical cancer in Tanzania (online supplementary appendix 1).  
33  
34 114 The CONCEPT study is an international collaborative study between Ocean Road Cancer Institute (ORCI),  
35  
36 115 Kilimanjaro Christian Medical Centre (KCMC), University of Southern Denmark, and the Danish Cancer  
37  
38 116 Society Research Center. The CONCEPT study has several specific objectives; (I) To investigate the natural  
39  
40 117 history of HPV and its associated factors; (II) To determine the feasibility and acceptability of HPV self-  
41  
42 118 sampling<sup>29</sup> and the test performance of *careHPV* compared to (HC2) and VIA<sup>6</sup>; and (III) how to ensure  
43  
44 119 follow-up of HPV-positive women, and elucidate what motivates or prevents these women from attending to  
45  
46 120 follow-up visits<sup>25 26 27</sup>. Introduction of HPV DNA testing in LMIC is challenging due to logistical problems  
47  
48 121 inherent in these settings, however, HPV-based primary screening is a key method in future screening  
49  
50 122 programmes across the world<sup>28</sup>, and for it to be effectively established in resource-limited settings, local  
51  
52 123 specific evidence is warranted. The aim of this article is to describe how this cohort was established and  
53  
54 124 followed up, the profile of the cohort, and provide some characteristics of the cohort at enrolment and at the  
55  
56 125 1<sup>st</sup> follow-up. The specific objectives of the CONCEPT study have been and will be published in separate  
57  
58 126 papers<sup>6 26 29-32</sup>.  
59  
60

1  
2  
3  
4 127

## 5 6 7 128 **Cohort description**

### 8 9 10 129 **Study design and study population**

11  
12  
13 130 This study was conducted in Tanzania, which is a low income country located in Eastern African with a  
14  
15 131 population of 56 million people<sup>33</sup>. Women were enrolled from three existing cervical cancer screening clinics  
16  
17 132 located in urban and semi-rural areas; (1) ORCI in Dar-es-Salaam as well as (2) KCMC and (3) Mawenzi  
18  
19 133 regional referral hospital in the Kilimanjaro region. ORCI is a national cancer hospital that provides clinical  
20  
21 134 care and treatment for all the cancer patients in the country. Additionally, they conduct cervical cancer  
22  
23 135 screening clinics three times a week for general population. KCMC Hospital is a Northern zonal tertiary  
24  
25 136 facility which provides cervical screening clinic three times a week for general population, and Mawenzi  
26  
27 137 Hospital is a Kilimanjaro regional hospital which provides cervical cancer screening two times a week. In  
28  
29 138 Dar-es-Salaam, women from Ilala, Temeke, and Mwananyamala district were included while in the  
30  
31 139 Kilimanjaro region, women originating from the urban and rural district of Moshi – including Hai and  
32  
33 140 Rombo – were included. Originally, the study was designed as a double-site study (KCMC/ORCI), however,  
34  
35 141 due to a slower-than-anticipated recruitment rate, a third study site (Mawenzi) was added six months into the  
36  
37 142 enrolment period. Women were eligible for inclusion if they were 25-60 years and attended a patient-  
38  
39 143 initiated routine cervical cancer screening at one of the study sites. Women were excluded if they were  
40  
41 144 pregnant, on their menstrual period, had a history of premalignant lesions of the cervix within the last 12  
42  
43 145 months, had previously been diagnosed with cervical cancer or had undergone abdominal hysterectomy.  
44  
45 146 Women on their menstrual period were encouraged to return once their menstrual period was over.  
46  
47 147 Following a detailed explanation of the study, all participants provided written informed consent.  
48  
49 148 Fingerprints were used for illiterate participants. The CONCEPT study was approved by the Ethical  
50  
51 149 Committee of the Tanzanian National Institute of Medical Research (NIMR/HQ/R.8a/Vol.IX/1955), and is  
52  
53 150 reported according to the Strengthening the Reporting of Observational studies in Epidemiology (STROBE)  
54  
55 151 statement (online supplementary appendix 2). HIV-positive women were oversampled from Care and  
56  
57  
58  
59  
60

1  
2  
3  
4  
5  
6  
7  
8  
9  
10  
11  
12  
13  
14  
15  
16  
17  
18  
19  
20  
21  
22  
23  
24  
25  
26  
27  
28  
29  
30  
31  
32  
33  
34  
35  
36  
37  
38  
39  
40  
41  
42  
43  
44  
45  
46  
47  
48  
49  
50  
51  
52  
53  
54  
55  
56  
57  
58  
59  
60

152 Treatment Clinics (CTC) at the study sites from where they were referred to the screening clinics. The total  
153 number of women and HIV-positives required for the study was found through a power calculation based on  
154 McNemar's test comparing two diagnostic tests (S1: standard test (VIA) versus S2: new test (careHPV)).  
155 The power calculation was based on the research group's previous study in Tanzania<sup>21</sup>. It was estimated that  
156 180-200 women would have precancerous lesions at baseline (~true positives) and assuming a significance  
157 level of 5% , 80% power, and a sensitivity of VIA of 30%, it would be possible to detect a significant  
158 difference if the sensitivity of the new test would be at least 44%. It was anticipated that *careHPV* testing  
159 would have a higher sensitivity than VIA.

160  
161 Data were collected during the enrolment visit, at 14 months (1<sup>st</sup> follow-up), and at 28 months (2<sup>nd</sup> follow-up,  
162 ongoing). As there is no a predefined optimal duration of time to investigate the natural history of HPV, the  
163 length of follow-up was based on a number of factors, including the recommended duration of time between  
164 cervical cancer screenings for HIV-positive women (12 months)<sup>33</sup>, available resources, risk for developing  
165 cervical lesions, and limiting the workload at the screening clinics by minimising overlaps between  
166 enrolment and follow-up visits. Healthcare providers working at the screening clinics enrolled participants  
167 and collected data following protocols developed specifically for the project. At inclusion, all participants  
168 were given a 14-months follow-up appointment written on an appointment card. If the women did not attend  
169 their follow-up visit within one month of their appointment, an active follow-up procedure was initiated.  
170 Firstly, non-attendees were contacted by phone and encouraged to attend (tracing method I). If the woman  
171 did not show up within two weeks of the phone call, the women had a home-visit by an outreach nurse who  
172 encouraged her to attend (tracing method II). If the woman still did not attend and consented to it, an  
173 outreach nurse visited her again and conducted the follow-up visit at home (tracing method III).  
174 Transportation costs were compensated for those women who were reminded to come. Women, who  
175 participated in the first follow-up were appointed a second follow-up visit 28 months after initial recruitment.  
176 If the woman did not attend the 2<sup>nd</sup> follow-up, tracing method I and III were re-initiated.

1

2

3

4

5

6

7

8

9

10

11

12

13

14

15

16

17

18

19

20

21

22

23

24

25

26

27

28

29

30

31

32

33

34

35

36

37

38

39

40

41

42

43

44

45

46

47

48

49

50

51

52

53

54

55

56

57

58

59

60

## 178 **Assessment of exposure**

179 At inclusion, socio-demographic, lifestyle, reproductive, and sexual characteristics were collected during a  
 180 personal interview using a modified version of a standardised questionnaire adopted from a previous study  
 181 conducted in Tanzania<sup>34</sup> (supplementary online appendix 3). The questionnaire was hardcopy, developed in  
 182 English while the interview was conducted in Kiswahili with direct translation. A Kiswahili version of the  
 183 questionnaire was available to guide the interviewers. A detailed contact information form was filled at  
 184 enrolment and updated at follow-up. Participants were screened by trained healthcare providers according to  
 185 the standard national cervical cancer screening prevention programme in Tanzania<sup>35</sup>. This entails a cost-free  
 186 gynaecological examination with VIA, HIV-testing and HIV-counselling. Venous blood from the index  
 187 finger was tested by use of a quick HIV-1/2 test (www.alere.com), and a supplementary quick HIV-1/2 test  
 188 (Abbott Laboratories) was performed as confirmatory for positive results. Discordant results were further  
 189 confirmed using Unigold (Trinity Biotech). Women who screened VIA-positive or were suspected of  
 190 manifest cancer were managed on-site based on the National Cervical Cancer Service Delivery Guidelines.  
 191 This included treatment with cryotherapy or loop electrosurgical excision procedure (LEEP) for VIA-  
 192 positives, and punch biopsy and referral for treatment at the oncology clinic at ORCI for cancer suspicions<sup>35</sup>.  
 193 Further, weight and height were measured and registered on a hard-copy registration sheet together with the  
 194 HIV- and VIA-result (Table 1).

196 **Table 1. Overview of data collected in the CONCEPT cohort**

| Baseline<br>17 Aug 2015 – 6 Jul 2017 | Measurements                                                                                                                                         | Instrument                                                                                                                    | Storage and analysis                                                                                                                                                                                                                                                                      |
|--------------------------------------|------------------------------------------------------------------------------------------------------------------------------------------------------|-------------------------------------------------------------------------------------------------------------------------------|-------------------------------------------------------------------------------------------------------------------------------------------------------------------------------------------------------------------------------------------------------------------------------------------|
|                                      | <b>Biological samples</b><br>1 provider-collected cervical swab for: <ul style="list-style-type: none"> <li>• <i>careHPV</i>® DNA-testing</li> </ul> | <ul style="list-style-type: none"> <li>• Aryes spatula</li> <li>• Kept in <i>careHPV</i> collection medium</li> </ul>         | <ul style="list-style-type: none"> <li>• Samples stored on-site in laboratories at room temperature</li> <li>• When 90 samples were available they were processed on-site on a <i>careHPV</i> machine</li> <li>• Results registered on <i>careHPV</i> sheet and stored on-site</li> </ul> |
|                                      | 1 provider-collected cervical swab for: <ul style="list-style-type: none"> <li>• Cytology</li> <li>• HC2</li> <li>• Genotyping</li> </ul>            | <ul style="list-style-type: none"> <li>• ThinPrep® Pap Test plastic spatula</li> <li>• Kept in PreServCyt solution</li> </ul> | <ul style="list-style-type: none"> <li>• Samples stored on-site in laboratories at room temperature until enrolment had finished</li> <li>• Then the samples were sent to the Pathology Department at Lillebaelt Hospital, Denmark and processed on the</li> </ul>                        |

|                                                                                |                                                                                                                                                                                                                        |                                                                                                                                                                                     |                                                                                                                                                                                                                                                                                                                                                                                                                                                                                                                      |
|--------------------------------------------------------------------------------|------------------------------------------------------------------------------------------------------------------------------------------------------------------------------------------------------------------------|-------------------------------------------------------------------------------------------------------------------------------------------------------------------------------------|----------------------------------------------------------------------------------------------------------------------------------------------------------------------------------------------------------------------------------------------------------------------------------------------------------------------------------------------------------------------------------------------------------------------------------------------------------------------------------------------------------------------|
|                                                                                |                                                                                                                                                                                                                        |                                                                                                                                                                                     | <p>ThinPrep5000 Autoloader Instrument, Hologic® for cytology</p> <ul style="list-style-type: none"> <li>• Remaining material of the samples were sent to the Section for Experimental Virology, Tubingen University, Germany and underwent HC2 DNA testing and genotyping using LiPaExtra</li> <li>• Cytology and HC2 and genotype results were sent to OUH, Denmark</li> </ul>                                                                                                                                      |
|                                                                                | Venous blood from index finger for:                                                                                                                                                                                    | • Quick HIV-1/2 test                                                                                                                                                                | • Immediate results registered on registration form and stored on-site                                                                                                                                                                                                                                                                                                                                                                                                                                               |
|                                                                                | <b>Visual assessment</b> <ul style="list-style-type: none"> <li>• VIA</li> </ul>                                                                                                                                       | • Acetic acid applied to cervix and abnormal tissue temporarily appears white                                                                                                       | • Immediate results registered on registration form and stored on-site                                                                                                                                                                                                                                                                                                                                                                                                                                               |
|                                                                                | <b>Anthropometric measures</b> <ul style="list-style-type: none"> <li>• Weight</li> <li>• Height</li> </ul>                                                                                                            | • Scale and altitude meter                                                                                                                                                          | • Immediate results registered on registration form and stored on-site                                                                                                                                                                                                                                                                                                                                                                                                                                               |
|                                                                                | <b>Personal interview</b> <ul style="list-style-type: none"> <li>• Socio-demographic factors</li> <li>• HIV treatment and CD4 count</li> <li>• Lifestyle factors</li> <li>• Sexual and reproductive factors</li> </ul> | • Structured questionnaire                                                                                                                                                          | <ul style="list-style-type: none"> <li>• Interviewed by nurse and stored on-site</li> <li>• CD4 count abstracted from CTC cards and further traced in patient files</li> </ul>                                                                                                                                                                                                                                                                                                                                       |
| <b>14-months follow-up (1<sup>st</sup>)</b><br><i>17 Oct 2016 – 6 Oct 2018</i> | <b>Biological samples</b><br>1 provider-collected cervical swab <i>or</i> self-collected swab for: <ul style="list-style-type: none"> <li>• HC2</li> <li>• Genotyping</li> </ul>                                       | <ul style="list-style-type: none"> <li>• ThinPrep® Pap Test plastic spatula (provider-based)</li> <li>• Evalyn® brush (self-swab)</li> <li>• Kept in PreServCyt solution</li> </ul> | <ul style="list-style-type: none"> <li>• Self-swabs were conducted in the women’s home (cf. tracing method III) and transferred to the study sites where they were stored with ThinPrep samples similarly to baseline until 1<sup>st</sup> follow-up had finished</li> <li>• Then the samples were sent to the Section for Experimental Virology, Tubingen University, Germany and underwent HC2 DNA testing and genotyping using LiPaExtra</li> <li>• HC2 and genotype results were sent to OUH, Denmark</li> </ul> |
|                                                                                |                                                                                                                                                                                                                        | • Quick HIV-1/2 test                                                                                                                                                                | • Immediate results registered on registration form and stored on-site                                                                                                                                                                                                                                                                                                                                                                                                                                               |
|                                                                                |                                                                                                                                                                                                                        | • Quick HIV-1/2 test                                                                                                                                                                | • Immediate results registered on registration form and stored on-site                                                                                                                                                                                                                                                                                                                                                                                                                                               |
|                                                                                |                                                                                                                                                                                                                        | • Quick HIV-1/2 test                                                                                                                                                                | • Immediate results registered on registration form and stored on-site                                                                                                                                                                                                                                                                                                                                                                                                                                               |
|                                                                                | Venous blood from index finger for:                                                                                                                                                                                    | • Quick HIV-1/2 test                                                                                                                                                                | <ul style="list-style-type: none"> <li>• HIV-test (if negative at baseline)</li> </ul>                                                                                                                                                                                                                                                                                                                                                                                                                               |
|                                                                                | • HIV-test (if negative at baseline)                                                                                                                                                                                   | • Quick HIV-1/2 test                                                                                                                                                                | <ul style="list-style-type: none"> <li>• HIV-test was not conducted on women who participated from home (cf. tracing method III)</li> </ul>                                                                                                                                                                                                                                                                                                                                                                          |
|                                                                                | <b>Visual assessment</b> <ul style="list-style-type: none"> <li>• VIA</li> </ul>                                                                                                                                       | • Acetic acid applied to cervix and abnormal tissue temporarily appears white                                                                                                       | • Immediate results registered on registration form and stored on-site                                                                                                                                                                                                                                                                                                                                                                                                                                               |
|                                                                                | • VIA                                                                                                                                                                                                                  | • Acetic acid applied to cervix and abnormal tissue temporarily appears white                                                                                                       | • Not conducted on women who participated from home (cf. tracing method III)                                                                                                                                                                                                                                                                                                                                                                                                                                         |
|                                                                                | <b>Personal interview</b> <ul style="list-style-type: none"> <li>• HIV treatment and CD4 count</li> <li>• Sexual factors</li> </ul>                                                                                    | • Structured questionnaire                                                                                                                                                          | <ul style="list-style-type: none"> <li>• Interviewed by nurse at clinic or at home and stored on-site</li> <li>• CD4 count abstracted from CTC cards and further traced in patient files</li> </ul>                                                                                                                                                                                                                                                                                                                  |
|                                                                                | • HIV treatment and CD4 count                                                                                                                                                                                          | • Structured questionnaire                                                                                                                                                          | • Interviewed by nurse at clinic or at home and stored on-site                                                                                                                                                                                                                                                                                                                                                                                                                                                       |
|                                                                                | • Sexual factors                                                                                                                                                                                                       | • Structured questionnaire                                                                                                                                                          | • CD4 count abstracted from CTC cards and further traced in patient files                                                                                                                                                                                                                                                                                                                                                                                                                                            |
| <b>28-months follow-up (2<sup>nd</sup>)</b><br><i>(17 November)</i>            | <b>Biological samples</b><br>1 provider-collected cervical swab <i>or</i> self-swab only for HPV-positive women: <ul style="list-style-type: none"> <li>• HC2</li> <li>• Genotyping</li> </ul>                         | <ul style="list-style-type: none"> <li>• ThinPrep® Pap Test plastic spatula (provider-based)</li> <li>• Evalyn® brush (self-swab)</li> <li>• Kept in PreServCyt solution</li> </ul> | • <i>Same procedure as in 1<sup>st</sup> follow-up</i>                                                                                                                                                                                                                                                                                                                                                                                                                                                               |
|                                                                                |                                                                                                                                                                                                                        | • ThinPrep® Pap Test plastic spatula (provider-based)                                                                                                                               | • <i>Same procedure as in 1<sup>st</sup> follow-up</i>                                                                                                                                                                                                                                                                                                                                                                                                                                                               |
|                                                                                |                                                                                                                                                                                                                        | • ThinPrep® Pap Test plastic spatula (provider-based)                                                                                                                               | • <i>Same procedure as in 1<sup>st</sup> follow-up</i>                                                                                                                                                                                                                                                                                                                                                                                                                                                               |

|  |                                                                                              |                                                                               |                                                        |
|--|----------------------------------------------------------------------------------------------|-------------------------------------------------------------------------------|--------------------------------------------------------|
|  | Venous blood from index finger for:<br>• HIV-test (if negative at 1 <sup>st</sup> follow-up) | • Quick HIV-1/2 test                                                          | • <i>Same procedure as in 1<sup>st</sup> follow-up</i> |
|  | <b>Visual assessment</b><br>• VIA                                                            | • Acetic acid applied to cervix and abnormal tissue temporarily appears white | • <i>Same procedure as in 1<sup>st</sup> follow-up</i> |
|  | <b>Personal interview</b><br>• HIV treatment and CD4 count<br>• Sexual factors               | • Structured questionnaire                                                    | • <i>Same procedure as in 1<sup>st</sup> follow-up</i> |

Prior to the routine VIA examination, cervical swabs were taken using (I) an Aryes spatula for *careHPV* test (www.qiagen.com), and another specimen was taken using (II) a ThinPrep® Pap Test Plastic Spatula for liquid-based cytology, HPV DNA testing and genotyping by use of HC2 and LiPaExtra (Innogenetics, Gent, Belgium). The cervical samples for *careHPV* analysis were kept in a *careHPV* collection medium and stored at room temperature (max 25°C) in laboratories at ORCI or KCMC. Once 90 samples had been collected, they were analysed for HR HPV using a *careHPV* machine. A test was considered positive if one or more of the following 14 HR HPV types were detected: HPV16, 18, 31, 33, 35, 39, 45, 51, 52, 56, 58, 59, 66, 68. The results were registered on a *careHPV* results sheet (Table 1).

The samples for HC2 testing, genotyping, and cytology were kept in a PreServCyt solution (Hologic, Inc. 250 Campus Drive Marlborough, MA 01752 USA) and stored at room temperature in laboratories at ORCI and KCMC. Once enrolment had finished, the PreServCyt vials were sent to the Department of Pathology at Lillebaelt Hospital, Vejle, Denmark and processed at the ThinPrep5000 Autoloader Instrument, Hologic® according to manufactures instruction and stained with ThinPrep Stain®. The slides were scanned by the Thin Prep Imaging System® with selection of 22 Fields of view which was reviewed by cytotechnologist in review scopes. The specimens were evaluated for adequacy and for abnormal cells. If abnormal cells were detected, the slides were consulted with a gynae-pathologist who made the final diagnosis. The specimens were diagnosed according to the Bethesda Nomenclature for System for Cervical Cytology 2014<sup>36</sup> into following categories: Negative for intra epithelial lesion (NILM), Atypical Squamous Cell of Undetermined



1  
2  
3  
4 217 Significance (ASCUS), Atypical Squamous Cell in which High grade squamous intraepithelial lesion cannot  
5  
6 218 be excluded (ASCH), Low grade Squamous Intraepithelial Lesion (LSIL), High grade Squamous  
7  
8 219 Intraepithelial Lesion (HSIL), Atypical Glandular Cell (AGC), Adenocarcinoma In Situ(AIS), and  
9  
10 220 Adenocarcinoma. The remaining material of the PreServCyt vials were sent to the Section for Experimental  
11  
12 221 Virology, Tubingen University, Germany for HPV DNA testing and genotyping. HPV DNA testing was  
13  
14 222 done using HC2 DNA test ([www.qiagen.com](http://www.qiagen.com)) with a HR cocktail probe. A test was considered positive if  
15  
16 223 one or more of the following 14 HR HPV types were found: HPV 16, 18, 31, 33, 35, 39, 45, 51, 52, 56, 58,  
17  
18 224 59, 66, 68. A threshold of 1.0pg HPVDNA/ml, which corresponds to 1.0 relative light unit coefficient, was  
19  
20 225 used, as recommended by United States Food and Drug Authority. HPV-positive samples were genotyped  
21  
22 226 using LiPaExtra, which can detect 28 HPV types, 18 HR risk types (HPV 16, 18, 26, 31, 33, 35, 39, 45, 51,  
23  
24 227 52, 53, 56, 58, 59, 66, 68, 73, 82) and 10 low risk types (HPV 6, 11, 40, 43, 44, 54, 69, 70, 71, 74)<sup>37</sup>.  
25  
26 228  
27  
28  
29

## 30 229 **Outcome measures**

31  
32 230 Women who attended their follow-up appointment at the screening clinics were HIV-tested (if negative at  
33  
34 231 baseline), had a cervical swab collected with a ThinPrep® Pap Test Plastic Spatula – for HPV DNA testing  
35  
36 232 by use of HC2 and genotyping by use of LiPaExtra – and underwent VIA (Table 1). Further, sexual and  
37  
38 233 reproductive characteristics were updated by use of a structured questionnaire (online supplementary  
39  
40 234 appendix 4). Women who did not attend their follow-up appointment at the clinic but consented to having a  
41  
42 235 home-visit appointment (cf. tracing method III) responded to the questionnaire and had cervical specimens  
43  
44 236 collected by use of an Evalyn self-sampling/self-swab device ([www.roversmedicaldevices.com](http://www.roversmedicaldevices.com)). The  
45  
46 237 samples were transferred to laboratories at ORCI and KCMC where they were kept in a PreServCyt solution  
47  
48 238 and stored at room temperature.  
49  
50  
51  
52 239

## 53 240 **Data management**

54  
55  
56 241 Questionnaires, registrations forms, contact forms, and *careHPV* result sheets were stored in different  
57  
58 242 cabinets in locked offices at KCMC and ORCI, after which they were double entered into EpiData by data  
59  
60

1  
2  
3  
4 243 clerks. Together with lab results these data were sent to the Research unit for Gynaecology& Obstetrics,  
5  
6 244 Odense University Hospital (OUH), Odense, Denmark where they were merged and constructed into a  
7  
8 245 baseline database. Data with invalid IDs or no data registered were excluded upon creation of the database.  
9  
10 246 Similarly to baseline, follow-up data were sent to OUH after which it was merged with the baseline database.  
11  
12 247 Follow-up IDs that could not match a baseline ID were excluded.  
13  
14  
15 248  
16

## 17 249 **Patient and public involvement**

18  
19  
20 250 Study participants were not involved in the design or recruitment of the study. In order to provide increase  
21  
22 251 public awareness, government and religious leaders were informed about the project, the latter through  
23  
24 252 mosques and churches. When the study finishes, the results and their potential implication to the public will  
25  
26 253 be communicated through meetings with health authorities, policy briefings, and announcements in the  
27  
28 254 mainstream media.  
29

## 30 255

## 31 256 **Findings to date**

### 32 257 **Baseline findings**

33  
34  
35  
36 258 A total of 4080 women were enrolled into the CONCEPT study. After inclusion, 37 study participants were  
37  
38  
39 259 excluded leaving the total cohort to consist of 4043 women (fig 1). The baseline distribution of the socio-  
40  
41 260 demographic is presented in Table 2. A total of 718 women (17.8%) were HIV-positive and the majority of  
42  
43 261 these were 35-39 years old (22.9%) while the majority of HIV-negative women were 40-44 years old  
44  
45 262 (19.2%). Among the HIV-positives, 49.7% were married (n=356) whilst 73.6% of HIV-negatives were  
46  
47 263 married (n=2434). Most of both HIV-positive (70.4%; n=504) and HIV-negative women (64.1%;n=2127)  
48  
49 264 had completed primary school. More HIV-negative women (87.0%; n=2879) reported to have had sex within  
50  
51 265 the last 12 months compared to HIV-positive women (72.7%; n=520), while more HIV-positives (26.2%)  
52  
53 266 than HIV-negatives (9.8%) reported to have had used condoms at every intercourse. In relation to number of  
54  
55 267 lifetime partners, 71.9% of HIV-positives reported having more than one lifetime partner whilst the  
56  
57  
58  
59  
60

268 corresponding number for HIV-negative women was 61.0%. The CD4 count for HIV-positive women were  
 269 as follows: 8.6% (n=62) reported having a CD4 count  $\leq$ 199; 30.5% (n=219) had a CD4 ranging from 200-  
 270 499; and 48.9% (n=347) had a CD4 count  $\geq$ 500. Further, 12.5% (n=90) of the HIV-positives did not report  
 271 the CD4 count.

**Table 2: Selected socio-demographic, lifestyle, sexual and reproductive characteristics of the cohort at baseline and 1<sup>st</sup> follow-up stratified according to HIV-status**

|                              | COHORT PROFILE AT BASELINE |      |                             |      |                            |      | COHORT PROFILE AT 1 <sup>ST</sup> FOLLOW-UP |      |                              |      |                               |      |
|------------------------------|----------------------------|------|-----------------------------|------|----------------------------|------|---------------------------------------------|------|------------------------------|------|-------------------------------|------|
|                              | Total (n=4043)             |      | HIV-positive (n=718; 17.8%) |      | HIV-negative (n=3325, 82%) |      | Total (n=3074)                              |      | HIV-positive* (n=552; 18.0%) |      | HIV-negative* (n=2522; 82.0%) |      |
|                              | N                          | %    | N                           | %    | N                          | %    | N                                           | %    | N                            | %    | N                             | %    |
| <b>Age</b>                   |                            |      |                             |      |                            |      |                                             |      |                              |      |                               |      |
| 25-29                        | 527                        | 13.0 | 43                          | 6.0  | 484                        | 14.6 | 344                                         | 11.2 | 26                           | 4.7  | 318                           | 12.6 |
| 30-34                        | 599                        | 14.8 | 78                          | 10.9 | 521                        | 15.7 | 432                                         | 14.1 | 61                           | 11.1 | 371                           | 14.7 |
| 35-39                        | 744                        | 18.4 | 164                         | 22.9 | 580                        | 17.5 | 547                                         | 17.8 | 121                          | 21.9 | 426                           | 16.9 |
| 40-44                        | 787                        | 19.5 | 149                         | 20.8 | 638                        | 19.2 | 634                                         | 20.6 | 115                          | 20.8 | 519                           | 20.6 |
| 45-49                        | 667                        | 16.5 | 138                         | 19.2 | 529                        | 15.9 | 522                                         | 17.0 | 112                          | 20.3 | 410                           | 16.7 |
| 50-60                        | 716                        | 17.7 | 145                         | 20.2 | 571                        | 17.2 | 595                                         | 19.4 | 117                          | 21.2 | 478                           | 18.9 |
| Missing                      | 3                          | 0.1  | 1                           | 0.14 | 2                          | 0.06 | -                                           | -    | -                            | -    | -                             | -    |
| <b>Marital status</b>        |                            |      |                             |      |                            |      |                                             |      |                              |      |                               |      |
| Married                      | 2790                       | 69.0 | 356                         | 49.7 | 2434                       | 73.6 | 2159                                        | 70.2 | 288                          | 52.2 | 1871                          | 74.2 |
| Cohabiting                   | 58                         | 1.4  | 14                          | 2.0  | 44                         | 1.3  | 44                                          | 1.4  | 11                           | 2.0  | 33                            | 1.3  |
| Single                       | 487                        | 12.0 | 110                         | 15.4 | 377                        | 11.4 | 335                                         | 10.9 | 76                           | 13.8 | 259                           | 10.3 |
| Divorced/widow               | 687                        | 17.0 | 236                         | 33.0 | 451                        | 13.6 | 527                                         | 17.1 | 176                          | 31.9 | 351                           | 13.9 |
| Missing                      | 21                         | 0.5  | 2                           | 0.28 | 19                         | 0.57 | 9                                           | 0.3  | 1                            | 0.2  | 8                             | 0.3  |
| <b>BMI</b>                   |                            |      |                             |      |                            |      |                                             |      |                              |      |                               |      |
| Underweight                  | 96                         | 2.4  | 27                          | 3.9  | 69                         | 2.1  | 73                                          | 2.4  | 21                           | 3.8  | 52                            | 2.1  |
| Normal                       | 1149                       | 28.4 | 269                         | 38.5 | 880                        | 27.3 | 839                                         | 27.3 | 199                          | 36.1 | 640                           | 25.4 |
| Overweight                   | 2190                       | 54.2 | 334                         | 47.8 | 1856                       | 57.6 | 1695                                        | 55.1 | 259                          | 46.9 | 1436                          | 56.9 |
| Obese                        | 486                        | 12.0 | 69                          | 9.9  | 417                        | 12.9 | 406                                         | 13.2 | 59                           | 10.7 | 347                           | 13.8 |
| Missing                      | 122                        | 3.0  | 19                          | 2.15 | 103                        | 3.1  | 61                                          | 2.0  | 14                           | 2.5  | 47                            | 1.9  |
| <b>Education level</b>       |                            |      |                             |      |                            |      |                                             |      |                              |      |                               |      |
| No formal education          | 126                        | 3.1  | 32                          | 4.5  | 94                         | 2.8  | 89                                          | 2.9  | 23                           | 4.2  | 66                            | 2.6  |
| Primary                      | 2631                       | 65.1 | 504                         | 70.4 | 2127                       | 64.1 | 2027                                        | 65.9 | 381                          | 69.0 | 2027                          | 65.3 |
| Secondary                    | 882                        | 21.8 | 146                         | 20.4 | 736                        | 22.2 | 672                                         | 21.9 | 123                          | 22.3 | 672                           | 21.8 |
| College                      | 396                        | 9.8  | 34                          | 4.7  | 362                        | 10.9 | 280                                         | 9.1  | 23                           | 4.2  | 280                           | 10.2 |
| Missing                      | 8                          | 0.2  | 2                           | 0.28 | 6                          | 0.18 | 6                                           | 0.2  | 2                            | 0.4  | 6                             | 0.7  |
| <b>Religion</b>              |                            |      |                             |      |                            |      |                                             |      |                              |      |                               |      |
| Christian                    | 2708                       | 67.0 | 505                         | 70.6 | 2203                       | 66.8 | 2064                                        | 67.1 | 391                          | 70.8 | 1673                          | 66.3 |
| Muslim                       | 1289                       | 31.9 | 206                         | 28.8 | 1083                       | 32.8 | 978                                         | 31.8 | 155                          | 28.1 | 823                           | 32.6 |
| Other                        | 16                         | 0.4  | 4                           | 0.6  | 12                         | 0.4  | 13                                          | 0.4  | 4                            | 0.7  | 9                             | 0.4  |
| Missing                      | 30                         | 0.7  | 3                           | 0.42 | 27                         | 0.81 | 19                                          | 0.6  | 2                            | 0.7  | 17                            | 0.6  |
| <b>No of living children</b> |                            |      |                             |      |                            |      |                                             |      |                              |      |                               |      |
| 0                            | 35                         | 0.9  | 5                           | 0.7  | 30                         | 0.9  | 22                                          | 0.7  | 4                            | 0.7  | 18                            | 0.7  |
| 1-2                          | 1506                       | 37.2 | 295                         | 41.8 | 1211                       | 37.5 | 1112                                        | 36.2 | 219                          | 39.7 | 893                           | 35.4 |
| 3                            | 901                        | 22.3 | 180                         | 25.5 | 721                        | 22.3 | 729                                         | 23.7 | 141                          | 25.5 | 588                           | 23.2 |
| 4-6                          | 1135                       | 28.1 | 183                         | 25.9 | 952                        | 29.5 | 900                                         | 29.3 | 150                          | 27.2 | 750                           | 29.7 |
| >7                           | 139                        | 3.4  | 19                          | 2.7  | 120                        | 3.7  | 99                                          | 3.2  | 12                           | 2.2  | 87                            | 3.5  |
| Never been pregnant          | 221                        | 5.5  | 24                          | 3.4  | 197                        | 6.1  | 144                                         | 4.7  | 16                           | 2.9  | 128                           | 5.1  |
| Missing                      | 106                        | 2.6  | 12                          | 1.67 | 94                         | 2.83 | 68                                          | 2.2  | 10                           | 1.8  | 58                            | 2.3  |

|                                         |      |      |     |      |      |      |      |      |     |      |      |      |  |  |  |
|-----------------------------------------|------|------|-----|------|------|------|------|------|-----|------|------|------|--|--|--|
| <b>Years living with partner</b>        |      |      |     |      |      |      |      |      |     |      |      |      |  |  |  |
| 0-1                                     | 166  | 4.1  | 21  | 3.0  | 145  | 4.4  | 102  | 3.3  | 18  | 3.3  | 84   | 3.3  |  |  |  |
| 2-4                                     | 517  | 12.8 | 112 | 15.9 | 405  | 12.4 | 355  | 11.6 | 74  | 13.4 | 281  | 11.4 |  |  |  |
| 5-9                                     | 723  | 17.9 | 143 | 20.3 | 580  | 17.8 | 515  | 16.8 | 106 | 19.2 | 409  | 16.2 |  |  |  |
| 10-14                                   | 648  | 16.0 | 125 | 17.7 | 523  | 16.0 | 502  | 16.3 | 97  | 17.6 | 405  | 16.1 |  |  |  |
| 15-19                                   | 546  | 13.5 | 104 | 14.8 | 442  | 13.6 | 443  | 14.4 | 85  | 15.4 | 358  | 14.2 |  |  |  |
| >20                                     | 1203 | 29.8 | 162 | 23.0 | 1041 | 31.9 | 993  | 32.2 | 137 | 24.8 | 856  | 33.9 |  |  |  |
| Single with no regular partner          | 163  | 4.0  | 38  | 5.4  | 125  | 3.8  | 118  | 3.8  | 27  | 4.9  | 91   | 3.6  |  |  |  |
| Missing                                 | 77   | 1.9  | 13  | 1.81 | 64   | 1.92 | 46   | 1.5  | 8   | 1.5  | 38   | 1.5  |  |  |  |
| <b>Sex in last 1 year</b>               |      |      |     |      |      |      |      |      |     |      |      |      |  |  |  |
| Yes                                     | 3399 | 84.1 | 520 | 72.7 | 2879 | 87.0 | 2583 | 84.0 | 404 | 73.2 | 2179 | 86.4 |  |  |  |
| No                                      | 610  | 15.1 | 195 | 27.3 | 415  | 12.5 | 478  | 15.6 | 146 | 26.5 | 332  | 13.2 |  |  |  |
| Never had sex                           | 14   | 0.3  | 0   | -    | 14   | 0.4  | 5    | 0.2  | 0   | 0.0  | 5    | 0.2  |  |  |  |
| Missing                                 | 20   | 0.5  | 3   | 0.42 | 17   | 0.51 | 8    | 0.3  | 2   | 0.4  | 6    | 0.2  |  |  |  |
| <b>Condom use within last 12 months</b> |      |      |     |      |      |      |      |      |     |      |      |      |  |  |  |
| No sex within last 12 months            | 610  | 15.1 | 195 | 27.3 | 415  | 12.6 | 478  | 15.6 | 146 | 26.5 | 332  | 13.2 |  |  |  |
| At every intercourse                    | 509  | 12.6 | 187 | 26.2 | 322  | 9.8  | 381  | 12.4 | 139 | 25.2 | 242  | 9.6  |  |  |  |
| Rarely                                  | 204  | 5.0  | 29  | 4.1  | 175  | 5.3  | 146  | 4.8  | 25  | 4.5  | 121  | 4.8  |  |  |  |
| No condom use                           | 2678 | 66.2 | 303 | 42.4 | 2375 | 71.9 | 2052 | 66.8 | 239 | 43.3 | 1813 | 71.9 |  |  |  |
| Never had sex                           | 14   | 0.3  | 0   | -    | 14   | 0.4  | 5    | 0.2  | 0   | 0.0  | 5    | 0.2  |  |  |  |
| Missing                                 | 28   | 0.7  | 4   | 0.56 | 24   | 0.72 | 12   | 0.4  | 3   | 0.5  | 9    | 0.4  |  |  |  |
| <b>Number of lifetime partners</b>      |      |      |     |      |      |      |      |      |     |      |      |      |  |  |  |
| 1                                       | 1476 | 36.5 | 197 | 28.1 | 1279 | 39.0 | 1129 | 36.7 | 158 | 28.6 | 971  | 38.5 |  |  |  |
| 2                                       | 1053 | 26.0 | 194 | 27.7 | 859  | 26.2 | 819  | 26.6 | 155 | 28.1 | 664  | 26.3 |  |  |  |
| 3                                       | 709  | 17.5 | 147 | 21.0 | 562  | 17.1 | 516  | 16.8 | 101 | 18.2 | 415  | 16.5 |  |  |  |
| 4                                       | 284  | 7.0  | 60  | 8.6  | 224  | 6.8  | 221  | 7.2  | 46  | 8.3  | 175  | 6.8  |  |  |  |
| 5-8                                     | 329  | 8.1  | 65  | 9.3  | 264  | 8.1  | 255  | 8.3  | 49  | 8.9  | 206  | 8.2  |  |  |  |
| >9                                      | 113  | 2.8  | 38  | 5.4  | 75   | 2.3  | 89   | 2.9  | 33  | 6.0  | 56   | 2.2  |  |  |  |
| Never had sex                           | 14   | 0.3  | 0   | -    | 14   | 0.4  | 5    | 0.2  | 0   | 0.0  | 5    | 0.2  |  |  |  |
| Missing                                 | 65   | 1.6  | 17  | 2.4  | 48   | 1.4  | 40   | 1.3  | 10  | 1.8  | 30   | 1.2  |  |  |  |

\*According to HIV-status at baseline

Among the 4043 participants, the cervical sample was insufficient for HPV analysis for 396 women (9.8%) at baseline, leaving 3667 women eligible for analysis of HPV-positivity. Further, 27 women (0.5%) did not have a sample for cervical cytology, leaving 4116 women available for cytological analysis of cervical lesions. All 4043 women were either tested for HIV or had previously tested HIV-positive. At baseline, 696 women (17.2%) tested HR HPV-positive by HC2. The cytology showed that overall 3.4% (n=139) had HSIL+ whilst 8.1% (n=329) of women had LSIL.

## 1st follow-up findings

1  
2  
3  
4  
5  
6  
7  
8  
9  
10  
11  
12  
13  
14  
15  
16  
17  
18  
19  
20  
21  
22  
23  
24  
25  
26  
27  
28  
29  
30  
31  
32  
33  
34  
35  
36  
37  
38  
39  
40  
41  
42  
43  
44  
45  
46  
47  
48  
49  
50  
51  
52  
53  
54  
55  
56  
57  
58  
59  
60

285 A total of 3805 women (94%) were eligible for 1<sup>st</sup> follow-up – 238 women (6%) were ineligible due to  
 286 becoming pregnant, having moved, having had a hysterectomy or having become sick or died (fig 1).Of the  
 287 3805 women, 3074 women(81%) attended the first follow-up visit approximately 14<sup>th</sup> months after  
 288 enrolment. However, among the attendees only 500 (16%) attended within in 30 days of their scheduled  
 289 appointment date and without being traced for follow-up. A total of 1088(35%) attended the clinic after a  
 290 phone call reminder(tracing method I), 62 women (2%) attended the clinic after a nurse home-visit(tracing  
 291 method II), whilst 1253 women (41%) were followed up at home and had specimens collected using self-  
 292 sampling device (tracing method III).A total of 731 women (19%) were lost to follow-up (fig 1).

(Fig 1: Flow chart of enrolment and follow-up of CONCEPT cohort)

The women who participated in the 1<sup>st</sup> follow-up were very similar to those who did not attend when looking  
 at socio-demographic factors (table 2). However, overall fewer women were HR HPV-positive at follow-up  
 compared to baseline (14.8% vs. 17.2%), and fewer HIV-positive women were HR HPV-positive at follow-  
 up compared to baseline (24.1% vs. 31.6%) (table 3).

**Table 3. HR HPV, HIV, and cytology results at baseline and 1<sup>st</sup> follow-up**

| Baseline      |      |      |             | First follow up |      |             |
|---------------|------|------|-------------|-----------------|------|-------------|
| Total(N=4043) |      |      |             | Total(N=3074)   |      |             |
| HPV           | n    | %    | (95% CI)    | n               | %    | (95% CI)    |
| Positive      | 696  | 17.2 | (0.16-0.18) | 438             | 14.3 | (0.13-0.16) |
| Negative      | 2951 | 73   | (0.72-0.74) | 2595            | 84.4 | (0.83-0.86) |
| Missing       | 396  | 9.8  | (0.09-0.1)  | 41              | 1.3  | (0.01-0.02) |
| HIV           |      |      |             |                 |      |             |
| Positive      | 718  | 17.8 | (0.17-0.19) | 552             | 18   | (0.17-0.2)  |
| Negative      | 3325 | 82.2 | (0.81-0.83) | 2522            | 82   | (0.80-0.83) |
| Cytology      |      |      |             |                 |      |             |
| HSIL          | 139  | 3.4  | (0.03-0.04) |                 |      |             |

|          |      |      |             |  |
|----------|------|------|-------------|--|
| LSIL     | 329  | 8.1  | (0.07-0.09) |  |
| Negative | 3548 | 87.8 | (0.87-0.89) |  |
| Missing  | 27   | 0.7  | (0.00-0.01) |  |

## Strengths and Limitations

This is a large-scale longitudinal cervical cancer study conducted in an HIV endemic population that aims to address a major cause of disease among East-African women, which so far has not received much focus within global health research. Women are followed over a long duration of time and with a large amount of data being collected by use of questionnaires and lab tests. Given the nature of our study a significant attrition rate was expected. However, with the carefully designed tracing plans and dedicated home-visiting staff we managed to attain an 81% participation rate at 1<sup>st</sup> follow-up. As women were enrolled during a patient-initiated screening at screening clinics, detailed HIV documentation was challenging to obtain as CTC cards were poorly documented or had not been brought to the screening. Despite the nurses calling these women after enrolment to retrieve the information, it was not provided by many HIV-positive participants. This has led to a certain amount of missing values for a few variables and have limited our ability and power in analyses involving HIV immunologic markers and treatment.

## Future plans

A second follow-up is underway (17 December 2018 – primo October 2020). Based on our large-scale data of both HPV infection in general and type specific characterised by the women's HIV-status, we plan to integrate this data with a previous cross-sectional HPV study (PROTECT Study) conducted in this population as this can increase power in our findings. As we have already established a large cohort of participants, we foresee a potential to further characterise the HPV burden and establish risk factors over a longer course of time. Specifically, we wish to compare the clinical performance of three potential cervical

1  
2  
3  
4 324 cancer screening strategies in Tanzania, namely (I) HC2 testing at varying cut-points of viral load as  
5  
6 325 measured by the RLU value; (II) HC2 testing with VIA triage; and (III) HC2 testing with triage using  
7  
8 326 HPV16/18 genotyping. Further, we also foresee the possibility of linking our evidence with other groups in  
9  
10 327 this population including males, adolescents, and pregnant women. This may provide additional information  
11  
12 328 on the similarities of epidemiological burden among these group and delineate differences in the correlations  
13  
14  
15 329 of HPV and HPV-related disease across these different groups.  
16  
17 330  
18

## 19 331 **Collaboration**

20  
21  
22 332 Researchers interested in collaboration in this discipline especially in East and Central Africa are welcomed.  
23  
24 333 This may be in extracting data from the project, jointly requesting further investigation from the cohort.  
25  
26  
27 334  
28

## 29 335 **Financial disclosure**

30  
31  
32 336 The work was supported by the Danish International Development Agency (Danida; 14-P02-Tan/A26775).  
33  
34 337 The recipient of the grant was the primary investigator of the CONCEPT study (JM). The funders had no  
35  
36 338 role in study design, data collection and analysis, decision to publish, or preparation of the manuscript.  
37  
38  
39 339  
40

## 41 340 **Acknowledgements**

42  
43  
44 341 We would like to thank Danida for supporting this study and thank all partners involved in the CONCEPT  
45  
46 342 study: Screening nurses, outreach nurses, laboratory personnel, and all the women who are part of the  
47  
48 343 CONCEPT study.  
49  
50  
51 344  
52  
53

## 54 345 **Contributors**

55  
56  
57 346 JM, RM, VR, and SKK designed the CONCEPT study. JM, RM, VR, SKK, JK, PS, CK, BM, and DSL were  
58  
59  
60

1  
2  
3  
4 347 involved in collecting data for the study. CW, SKK, VR, BM, and DSL, were involved in data analysis and  
5  
6 348 interpretation. CW, BM, DSL contributed to the conception of this article, and CW, BM, DSL, PS, JK, CK,  
7  
8 349 VR, JM, SKK, and RM were involved in the manuscript writing and revision. All authors read and approved  
9  
10  
11 350 the final manuscript.

12  
13 351

## 16 352 **Data sharing statement**

18  
19  
20 353 Data collected for the CONCEPT cohort study are available upon request. Individual participant data will de-  
21  
22 354 identified. Additional available data include the CONCEPT eligibility and informed consent form, the  
23  
24 355 CONCEPT contact information form, the protocol for how to deliver HPV-positive results to participants,  
25  
26 356 the protocol for how to trace non-attendants. Data will be made available upon request by contacting the first  
27  
28 357 or last author of this study by email at barikimchome@gmail.com/dsondergaard@health.sdu.dk, who will  
29  
30 358 then seek approval by the primary investigator in the CONCEPT project, Julius D. Mwaiselage.

31  
32 359

## 34 360 **Competing interests**

36  
37  
38 361 There are no competing interests for any author.

39 362

## 41 363 **Supplementary material**

42  
43  
44  
45 364 Supplementary appendix 1 Original protocol for CONCEPT study  
46  
47 365 Supplementary appendix 2 STROBE checklist  
48  
49 366 Supplementary appendix 3 CONCEPT baseline questionnaire  
50  
51 367 Supplementary appendix 4 CONCEPT 1<sup>st</sup> follow-up questionnaire  
52

## 53 54 368 **Abbreviations**

55  
56  
57  
58 369 ACCME African Collaborative Center for Microbiome and Genomics Research  
59  
60



1  
2  
3  
4  
5  
6  
7  
8  
9  
10  
11  
12  
13  
14  
15  
16  
17  
18  
19  
20  
21  
22  
23  
24  
25  
26  
27  
28  
29  
30  
31  
32  
33  
34  
35  
36  
37  
38  
39  
40  
41  
42  
43  
44  
45  
46  
47  
48  
49  
50  
51  
52  
53  
54  
55  
56  
57  
58  
59  
60

|     |         |                                                                                               |
|-----|---------|-----------------------------------------------------------------------------------------------|
| 370 | AGC     | Atypical glandular cell                                                                       |
| 371 | AIS     | Adenocarcinoma in situ                                                                        |
| 372 | ASCUS   | Atypical squamous cell of undetermined significance                                           |
| 373 | ASCH    | Atypical squamous cell in which High grade squamous intraepithelial lesion cannot be excluded |
| 374 |         |                                                                                               |
| 375 | CTC     | Care and treatment clinic                                                                     |
| 376 | CONCEPT | Comprehensive Cervical Cancer Prevention in Tanzania                                          |
| 377 | Danida  | Danish International Development Agency                                                       |
| 378 | HARP    | HPV in Africa Research Partnership                                                            |
| 379 | HC2     | Hybrid Capture 2                                                                              |
| 380 | HIC     | High-income countries                                                                         |
| 381 | HIV     | Human immuno-deficiency virus                                                                 |
| 382 | HPV     | Human papilloma virus                                                                         |
| 383 | HSIL    | High grade squamous intraepithelial lesion                                                    |
| 384 | KCMC    | Kilimanjaro Christian Medical Centre                                                          |
| 385 | LEEP    | Loop electrosurgical procedure                                                                |
| 386 | LMIC    | Low- and middle-income countries                                                              |
| 387 | LSIL    | Low grade squamous intraepithelial lesion                                                     |
| 388 | NILM    | Negative for intra epithelial lesion                                                          |
| 389 | PROTECT | Prevention of Cervical Cancer in Tanzania                                                     |
| 390 | ORCI    | Ocean Road Cancer Institute                                                                   |

## Figure legends

Figure 1 Flow chart of enrolment and follow-up of CONCEPT cohort

## References

1. World Health Organization. Improving data for decision-making: a toolkit for cervical cancer prevention and control programmes. 2018. <http://apps.who.int/iris>.
2. Serrano B, Brotons M, Bosch FX, et al. Epidemiology and burden of HPV-related disease. *Best Pract Res Clin Obstet Gynaecol* 2018;47:14-26. doi: 10.1016/j.bpobgyn.2017.08.006 [published Online First: 2017/10/19]
3. Torre LA, Islami F, Siegel RL, et al. Global Cancer in Women: Burden and Trends. *Cancer epidemiology, biomarkers & prevention : a publication of the American Association for Cancer Research, cosponsored by the American Society of Preventive Oncology* 2017;26(4):444-57. doi: 10.1158/1055-9965.epi-16-0858 [published Online First: 2017/02/23]
4. Bruni LB-RL AG, Serrano B. Human Papillomavirus and Related Diseases in Tanzania. Summary Report. *ICO Information Centre on HPV and Cancer (HPV Information Centre)* 2016; 15
5. Dartell MA, Rasch V, Iftner T, et al. Performance of visual inspection with acetic acid and human papillomavirus testing for detection of high-grade cervical lesions in HIV positive and HIV negative Tanzanian women. *International journal of cancer* 2014;135(4):896-904. doi: 10.1002/ijc.28712 [published Online First: 2014/01/07]
6. Linde DS, Korsholm M, Katanga J, et al. One-way SMS and healthcare outcomes in Africa: Systematic review of randomised trials with meta-analysis. *PloS one* 2019;14(6):e0217485. doi: 10.1371/journal.pone.0217485 [published Online First: 2019/06/07]
7. Gard AC, Soliman AS, Ngoma T, et al. Most women diagnosed with cervical cancer by a visual screening program in Tanzania completed treatment: evidence from a retrospective cohort study. *BMC public health* 2014;14:910. doi: 10.1186/1471-2458-14-910 [published Online First: 2014/09/05]
8. Bruni L, Diaz M, Castellsague X, et al. Cervical human papillomavirus prevalence in 5 continents: meta-analysis of 1 million women with normal cytological findings. *The Journal of infectious diseases* 2010;202(12):1789-99. doi: 10.1086/657321 [published Online First: 2010/11/12]
9. Nowak RG, Gravitt PE, Morrison CS, et al. Increases in human papillomavirus detection during early HIV infection among women in Zimbabwe. *J Infect Dis* 2011;203(8):1182-91. doi: 10.1093/infdis/jiq172 [published Online First: 2011/04/01]
10. Dames DN, Blackman E, Butler R, et al. High-risk cervical human papillomavirus infections among human immunodeficiency virus-positive women in the Bahamas. *PloS one* 2014;9(1):e85429. doi: 10.1371/journal.pone.0085429 [published Online First: 2014/01/28]
11. Looker KJ, Ronn MM, Brock PM, et al. Evidence of synergistic relationships between HIV and Human Papillomavirus (HPV): systematic reviews and meta-analyses of longitudinal studies of HPV acquisition and clearance by HIV status, and of HIV acquisition by HPV status. *Journal of the International AIDS Society* 2018;21(6):e25110. doi: 10.1002/jia2.25110 [published Online First: 2018/06/07]
12. Akarolo-Anthony SN, Famooto AO, Dareng EO, et al. Age-specific prevalence of human papilloma virus infection among Nigerian women. *BMC public health* 2014;14:656. doi: 10.1186/1471-2458-14-656 [published Online First: 2014/06/29]
13. Guan P, Howell-Jones R, Li N, et al. Human papillomavirus types in 115,789 HPV-positive women: a meta-analysis from cervical infection to cancer. *International journal of cancer* 2012;131(10):2349-59. doi: 10.1002/ijc.27485 [published Online First: 2012/02/11]
14. Edna Omar V, Orvalho A, Nalia I, et al. Human papillomavirus prevalence and genotype distribution among young women and men in Maputo city, Mozambique. *BMJ open* 2017;7(7):e015653. doi: 10.1136/bmjopen-2016-015653 [published Online First: 2017/07/19]
15. Husain RS, Ramakrishnan V. Global Variation of Human Papillomavirus Genotypes and Selected Genes Involved in Cervical Malignancies. *Annals of global health* 2015;81(5):675-83. doi: 10.1016/j.aogh.2015.08.026 [published Online First: 2016/04/03]
16. Ogembo RK, Gona PN, Seymour AJ, et al. Prevalence of human papillomavirus genotypes among African women with normal cervical cytology and neoplasia: a systematic review and meta-analysis. *PloS one* 2015;10(4):e0122488. doi: 10.1371/journal.pone.0122488 [published Online First: 2015/04/16]
17. World Health Organization. Human papillomavirus (HPV) and cervical cancer. 2019. [https://www.who.int/en/news-room/fact-sheets/detail/human-papillomavirus-\(hpv\)-and-cervical-cancer](https://www.who.int/en/news-room/fact-sheets/detail/human-papillomavirus-(hpv)-and-cervical-cancer).
18. Bosch FX, Munoz N. The viral etiology of cervical cancer. *Virus research* 2002;89(2):183-90. [published Online First: 2002/11/26]

- 1  
2  
3  
4 448 19. Kelly HA, Ngou J, Chikandiwa A, et al. Associations of Human Papillomavirus (HPV) genotypes with high-grade  
5 449 cervical neoplasia (CIN2+) in a cohort of women living with HIV in Burkina Faso and South Africa. *PloS one*  
6 450 2017;12(3):e0174117. doi: 10.1371/journal.pone.0174117 [published Online First: 2017/03/24]  
7 451 20. Adebamowo SN, Dareng EO, Famooto AO, et al. Cohort Profile: African Collaborative Center for Microbiome and  
8 452 Genomics Research's (ACCME's) Human Papillomavirus (HPV) and Cervical Cancer Study. *International*  
9 453 *journal of epidemiology* 2017;46(6):1745-45j. doi: 10.1093/ije/dyx050 [published Online First: 2017/04/19]  
10 454 21. Dartell M, Rasch V, Kahesa C, et al. Human papillomavirus prevalence and type distribution in 3603 HIV-positive  
11 455 and HIV-negative women in the general population of Tanzania: the PROTECT study. *Sexually transmitted*  
12 456 *diseases* 2012;39(3):201-8. doi: 10.1097/OLQ.0b013e31823b50ad [published Online First: 2012/02/18]  
13 457 22. Watson-Jones D, Baisley K, Brown J, et al. High prevalence and incidence of human papillomavirus in a cohort of  
14 458 healthy young African female subjects. *Sexually transmitted infections* 2013;89(5):358-65. doi:  
15 459 10.1136/sextrans-2012-050685 [published Online First: 2013/03/15]  
16 460 23. Houlihan CF, Baisley K, Bravo IG, et al. Rapid acquisition of HPV around the time of sexual debut in adolescent  
17 461 girls in Tanzania. *Int J Epidemiol* 2016;45(3):762-73. doi: 10.1093/ije/dyv367 [published Online First:  
18 462 2016/03/06]  
19 463 24. Baisley KJ, Andreasen A, Irani J, et al. HPV prevalence around the time of sexual debut in adolescent girls in  
20 464 Tanzania. *Sex Transm Infect* 2019 doi: 10.1136/sextrans-2019-054012 [published Online First: 2019/06/22]  
21 465 25. Linde DS, Andersen MS, Mwaiselage JD, et al. Text messages to increase attendance to follow-up cervical cancer  
22 466 screening appointments among HPV-positive Tanzanian women (Connected2Care): study protocol for a  
23 467 randomised controlled trial. *Trials* 2017;18(1):555. doi: 10.1186/s13063-017-2215-x [published Online First:  
24 468 2017/11/23]  
25 469 26. Linde DS, Rasch V, Mwaiselage JD, et al. Competing needs: a qualitative study of cervical cancer screening  
26 470 attendance among HPV-positive women in Tanzania. *BMJ open* 2019;9(2):e024011. doi: 10.1136/bmjopen-  
27 471 2018-024011 [published Online First: 2019/03/02]  
28 472 27. Linde DS AM, Mwaiselage JD, Manongi R, Kjaer SK, Rasch V. One-way text messages versus no text messages on  
29 473 attendance to follow-up cervical cancer screening among HPV-positive Tanzanian Women (Connected2Care):  
30 474 a parallel-group randomized controlled trial. *JMIR Preprints* 15/08/2019:15863 doi: DOI:  
31 475 10.2196/preprints.15863  
32 476 28. Koliopoulos G, Nyaga VN, Santesso N, et al. Cytology versus HPV testing for cervical cancer screening in the  
33 477 general population. *The Cochrane database of systematic reviews* 2017;8:Cd008587. doi:  
34 478 10.1002/14651858.CD008587.pub2 [published Online First: 2017/08/11]  
35 479 29. Bakiewicz A, Rasch V, Mwaiselage J, et al. "The best thing is that you are doing it for yourself" - perspectives on  
36 480 acceptability and feasibility of HPV self-sampling among cervical cancer screening clients in Tanzania: a  
37 481 qualitative pilot study. *BMC women's health* 2020;20(1):65. doi: 10.1186/s12905-020-00917-7 [published  
38 482 Online First: 2020/04/03]  
39 483 30. Katanga J, Kjaer SK, Manongi R, et al. Performance of careHPV, hybrid capture 2 and visual inspection with acetic  
40 484 acid for detection of high-grade cervical lesion in Tanzania: A cross-sectional study. *PloS one*  
41 485 2019;14(6):e0218559. doi: 10.1371/journal.pone.0218559 [published Online First: 2019/06/20]  
42 486 31. Linde DS, Andersen MS, Mwaiselage J, et al. Effectiveness of One-Way Text Messaging on Attendance to Follow-  
43 487 Up Cervical Cancer Screening Among Human Papillomavirus-Positive Tanzanian Women (Connected2Care):  
44 488 Parallel-Group Randomized Controlled Trial. *Journal of medical Internet research* 2020;22(4):e15863. doi:  
45 489 10.2196/15863 [published Online First: 2020/04/03]  
46 490 32. McHome BL, Kjaer SK, Manongi R, et al. HPV types, cervical high-grade lesions and risk factors for oncogenic  
47 491 human papillomavirus infection among 3416 Tanzanian women. *Sex Transm Infect* 2020 doi:  
48 492 10.1136/sextrans-2019-054263 [published Online First: 2020/04/10]  
49 493 33. Cervical cancer prevention guidelines for low-resource settings. Available:  
50 494 [http://resources.jhpiego.org/system/files/resources/cecap\\_trainer\\_0.pdf](http://resources.jhpiego.org/system/files/resources/cecap_trainer_0.pdf). 2011  
51 495 34. Dartell M, Rasch V, Munk C, et al. Risk factors for high-risk human papillomavirus detection among HIV-negative  
52 496 and HIV-positive women from Tanzania. *Sexually transmitted diseases* 2013;40(9):737-43. doi:  
53 497 10.1097/olq.0000000000000005 [published Online First: 2013/08/21]  
54 498 35. Paul D. Blumenthal NM. Cervical Cancer Prevention Guidelines for Low-Resource Settings 2007: Jhpiego; 2005  
55 499 [Available from: <http://reprolineplus.org/system/files/resources/CeCaPfullmanual.pdf>.  
56 500 36. Nayar R, Wilbur DC. The Pap Test and Bethesda 2014. "The reports of my demise have been greatly exaggerated."  
57 501 (after a quotation from Mark Twain). *Acta Cytol* 2015;59(2):121-32. doi: 10.1159/000381842 [published  
58 502 Online First: 2015/05/23]  
59 503 37. Xu L, Padalko E, Ostrbenk A, et al. Clinical Evaluation of INNO-LiPA HPV Genotyping EXTRA II Assay Using  
60 504 the VALGENT Framework. *Int J Mol Sci* 2018;19(9) doi: 10.3390/ijms19092704 [published Online First:  
60 505 2018/09/14]

1  
2  
3  
4 506  
5  
6  
7  
8  
9  
10  
11  
12  
13  
14  
15  
16  
17  
18  
19  
20  
21  
22  
23  
24  
25  
26  
27  
28  
29  
30  
31  
32  
33  
34  
35  
36  
37  
38  
39  
40  
41  
42  
43  
44  
45  
46  
47  
48  
49  
50  
51  
52  
53  
54  
55  
56  
57  
58  
59  
60

For peer review only

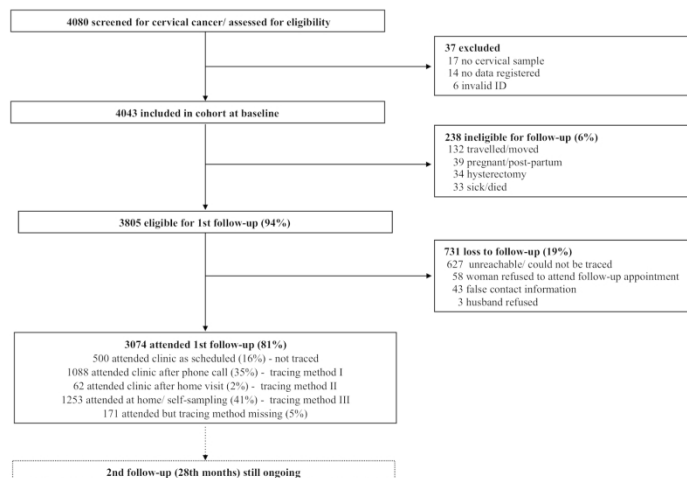

Flow chart

190x134mm (310 x 310 DPI)

## Appendix A: Project Description

### Comprehensive Cervical Cancer Prevention in Tanzania (CONCEPT)

#### 1. Project Summary

The natural history of Human papillomavirus (HPV) in sub-Saharan Africa is not yet fully understood. As persistent HPV infection is a necessary factor in development of cervical cancer – a major health problem in sub-Saharan Africa – information about how HIV together with other risk factors interacts with HPV acquisition and HPV persistence/clearance is warranted. Additionally, concern prevails about the quality of cervical cancer preventive strategies in sub-Saharan Africa. Against this background the project aims to provide a better understanding of the natural history of HPV with a view to HIV status, to measure the impact of a novel and simple screening method based on *CareHPV* testing and to assess how continuity of care among women who are tested HPV positive can be improved. The study will be linked up with the existing cervical cancer screening program at Ocean Road Cancer Institute (ORCI) and Kilimanjaro Christian Medical Centre (KCMC); and will include 4000 women who are attending screening service or HIV care and treatment. HPV acquisition and persistence/clearance patterns as well as the absolute risk of severe cervical precancerous lesions will be determined through a follow up study lasting 28 months. The test performance of *CareHPV* testing, liquid-based cytology and VIA will be described and the operating characteristics of the three screening methods will be assessed according to HIV status. Finally, the impact of a mobile phone intervention and a patient navigation model will be assessed and compared according to the proportion of HPV positive women who return for follow-up examinations. Additionally, the project will implement a research capacity building component focusing on transfer of knowledge and technology as well as training of PhD students. The activities will be carried out as five sub-studies: i) HPV acquisition pattern; ii) HPV persistence/clearance pattern; iii) Test performance of *CareHPV* testing, liquid-based cytology and VIA; iv) Continuity of care among screened positive women and v) research capacity building as well as transfer of knowledge and technology

#### 2. Objectives

With the overall aim of substantially improving cervical cancer prevention in Tanzania and thereby reduce mortality, the CONCEPT project focuses on the natural history of human papillomavirus (HPV), which is the most important risk factor for cervical cancer.

HPV can take the form of being either a transient infection, that relatively rapidly is cleared by the host immune system or it can become a persistent infection that may progress to high-grade cervical lesions or cervical cancer (**Fig. 1**). In spite of the fact that cervical cancer is the most common malignancy among women in Sub-Saharan Africa (1), little is known about the distribution of HPV types, risk factors of incidence and patterns of persistence for different HPV types. The proposed project will address this lack of knowledge and provide new information about the natural history of HPV and consequences of HPV infection among HIV positive and HIV negative women. In addition, there is concern about the performance of the screening approaches applied in many sub-Saharan African countries and information on the quality of novel, affordable screening approaches that will perform well in remote areas is warranted. Finally, in many sub-Saharan African settings worries prevail about lack of continuity of care among women who are diagnosed with precancerous lesions and therefore relevant treatment is not always offered. The proposed project will address these shortcomings in cervical cancer prevention. The research will build on the results previously obtained by our research team (2-6) and will be innovative in the way that it through a comprehensive approach will use the natural history of HPV to identify opportunities to strengthen and further develop the existing screening program in Tanzania, with a particular view to the importance of HIV positivity. In addition, with the aim to bridge the gap in continuity of care among women diagnosed with precancerous lesions, the project will develop and test a reliable and sustainable communication system through a multidisciplinary approach, involving community education, social mobilization and use of cell-phones. Thus the proposed study has the potential to produce results with immediate public health impact.

The specific objectives of the project are:

1. To assess acquisition patterns and incidence of HPV infection with a specific focus on differences in HPV acquisition, distribution of HPV types and risk factors among HIV positive and HIV negative women
2. To assess persistence of high-risk HPV infection with a specific focus on whether there are differences in HPV persistence in relation to specific HPV types and differences in risk factors for HPV persistence among HIV positive and HIV negative women. In addition, it is the aim to examine the absolute risk of HSIL or worse in relation to both one time HPV positivity and HPV persistence while taking HIV status into account
3. To evaluate the performance of Self collected *CareHPV* testing, health provider collected HPV test, Pap smear (liquid-based cytology) and visual inspection with acetic acid (VIA) for detection of cervical precancerous lesions with a special view to test performance among HIV positive and HIV negative women.
4. To evaluate and compare two different interventions aiming at ensuring continuity of care among women who are tested HPV positive in terms of effect and costs, and to describe barriers for not adhering to the scheduled follow-up
5. To enhance research capacity and transfer of knowledge and technology through the training of PhD students and the involvement of a post-doctoral fellow

### 3. Project's methodology

Based on the experience and success of our previous study of HPV prevalence in Tanzanian women, the present study will be linked up with the existing cervical cancer screening program in Dar es Salaam and Kilimanjaro Region. To make sure that we will include enough HIV positive women into the study, we will oversample HIV positive women. This will be done through enrolment of women attending HIV care and treatment in the two study areas. A total of 4000 women will be enrolled at baseline in the study - 3500 women from the two screening settings and 500 HIV positive women from two HIV care and treatment clinics. Based on our previous experience, among the 3500 women recruited from the screening settings, around 700 will be high-risk (HR)-HPV positive and nearly 350 women will be HIV positive (2). Among the 500 HIV positive women recruited from the HIV clinics, an estimated 250 women will be HPV positive (2). Hence, the total study sample of 4000 women will include an estimated 950 HPV positive and 850 HIV positive women. A power calculation was based on McNemars test in the situation where we compare two diagnostic tests (1: standard test (VIA) vs 2: new test (*CareHPV*)) where the outcome is sensitivity  $S_1$  and  $S_2$ , respectively. Based on our previous studies in Tanzania (4) it is estimated that 180-200 women will have precancerous lesions at baseline (~true positive), and we assume a significance level of 5% and that the sensitivity of the standard test is  $S_1=30\%$ . We will then with 80% power be able to detect a significant difference if the sensitivity of the new test is at least  $S_2=44\%$ . As we anticipate *CareHPV* testing to have a much higher sensitivity, we will have sufficient power in the present study

An overview of the study design is outlined in **Fig. 2**. In principle the study comprises a baseline visit and 2 follow-up visits:

**At baseline** we will collect on all participating women a cervical sample for *CareHPV* testing, a novel and simple quick test for detection of HPV. We will also obtain a liquid-based cervical swab (ThinPrep) for cytology examination (subsequently prepared and diagnosed in Denmark), high-risk Hybrid Capture (HC2) testing (in Germany), and genotyping (PCR-based HPV testing in Germany). Following this, VIA will be done with 5% acetic acid. The Tanzanian staff will receive training (re-training) in sample collection and VIA before start of the study by national trainers according to IARC guidelines. In case of a positive cytology (HSIL or worse) the woman will be called in and will be treated according to the cervical cancer screening standard of care methods in Tanzania. Similarly, all VIA positive women will be treated according to the cervical cancer screening standard of care methods in Tanzania. Information on socio-economic characteristics, lifestyle factors and reproductive history will be recorded through a personal

1  
2 interview, and blood samples for HIV testing will be obtained. Before the initiation of the study,  
3 the staff in Tanzania will receive training in *CareHPV* testing. The *CareHPV* (including currently  
4 known HR-HPV types 16, 18, 31, 33, 35, 39, 45, 51, 52, 56, 58, 59, 66, and 68) will be tested  
5 within 14 days in Tanzania. At the **first follow-up**, taking place 14 months after inclusion, a  
6 randomly selected sample of 500 women will be trained on self-collection of a cervical swab for  
7 HPV testing. Thereafter another cervical swab (ThinPrep) will be collected (on all study  
8 subjects in the 1<sup>st</sup> follow-up) by a trained health provider. At the **second follow-up**, taking  
9 place 26 months after inclusion, a cervical swab (ThinPrep) will be obtained from each woman.  
10 Women who do not return to the clinic for first and second follow-up will be traced and visited  
11 at home and invited to attend the clinic for screening. If they do not wish to re-attend, they  
12 will be offered screening through a self-collected HPV sample. We anticipate a response rate in  
13 the 1<sup>st</sup> follow-up at 90% and a response rate in the 2<sup>nd</sup> follow-up at 80%. The anticipated  
14 follow-up rate is based on experiences from previous follow-up studies in Tanzania (7).  
15 The study is grouped in five work package according to the specific objectives:  
16  
17

### **Work package 1, Acquisition patterns of high-risk (HR) human papillomavirus (HPV)**

**with a special view to HIV status:** Among women testing HR-HPV negative at baseline (Fig. 2), all women testing HIV positive (~190 from the screening clinic and 250 from HIV clinics = 440 in total) as well as a random sample of 560 HPV negative/HIV negative women will be invited to a new gynecological examination after 14 months (1<sup>st</sup> follow-up visit), where a health provider cervical swab (ThinPrep) sample on all women is taken. These samples will all be tested for HPV using HC2 and genotyping will be performed on the HPV positive samples. At the 2<sup>nd</sup> follow-up visit (at 26 months) a health provider taken cervical swab (ThinPrep) will be obtained. All samples from the 2<sup>nd</sup> follow-up will be sent to Denmark for establishment of a cytology diagnosis and the remaining material will be sent to Germany for HC2 testing and subsequent genotyping of the HPV positives. All cytology results and HPV results will be sent back to Tanzania. In case of a positive cytology (HSIL or worse) the woman will be called in and will be treated according to the cervical cancer screening standard of care methods in Tanzania.

Based on the literature (8) we estimate an HPV acquisition rate among the initially HPV negative women at 1<sup>st</sup> follow-up of around 10%, similarly an acquisition rate of 10% from the 1<sup>st</sup> to the 2<sup>nd</sup> follow-up. The association between HR-HPV acquisition and the women's age, life style characteristics, reproductive history and HIV status will be assessed.

### **Work package 2, Persistence patterns of high-risk HPV types and absolute risk of severe cervical lesions focusing on the importance of HIV status:**

Persistence/clearance patterns of HR-HPV will be determined among all women who are HR-HPV positive at baseline (Fig. 2) (~700 from the screening clinic and 250 from the HIV clinic i.e. ~950 in total). They will be invited for follow-up examinations and tested for HR-HPV after 14 and 26 months (1<sup>st</sup> and 2<sup>nd</sup> follow-up visit). For this group of women also a self-collected cervical swab will be obtained at the 1<sup>st</sup> follow-up in 500 randomly selected women. HPV genotyping will be performed among women who are HR-HPV positive during follow-up. Women who are persistently HPV positive for the same HPV type at enrolment and at 1<sup>st</sup> follow-up will be called in for a cytological examination at the respective clinic. Also in case of a positive cytology (HSIL or worse), the women will be called in for further follow-up. HR-HPV persistence/clearance patterns will be described in relation to the women's age, life style characteristics, reproductive history, HIV status and HPV genotype. We estimate a persistence rate of 40% after 14 months and of 20% after 26 months (9). Due to the fact that a cytology diagnosis is obtained on all women at the 2<sup>nd</sup> follow-up, we will also be able to look at the absolute risk of HSIL or worse in relation to both one time HPV positivity, HPV persistence and according to HIV status.

### **Work package 3, Test performance of CareHPV testing, pap smear and VIA for detection of cervical precancerous lesions:**

As described above, all 4000 women enrolled will be screened by use of *CareHPV* testing, Pap smear (liquid based cytology i.e. ThinPrep) and VIA at the study baseline, and the sensitivity and specificity of *CareHPV* testing and VIA will be estimated and the positive and negative predictive values calculated. The operating



1  
2 characteristics of the two screening methods will be assessed according to HIV status. All VIA  
3 positive women will subsequently be treated in agreement with the cervical cancer screening  
4 standard of care methods in Tanzania. In case of a positive cytology that was not already  
5 identified through a positive VIA, the women will be called in for further follow-up. High-quality  
6 cervical liquid-based cytology and where possible also cervical biopsies will be used as Gold  
7 Standard. Based on the samples collected at the 1<sup>st</sup> follow-up, the HPV results from the self-  
8 collected brush and the health provider collected brush will be compared.  
9

10 **Work package 4, Continuity of care among women who are tested are HPV positive –**  
11 **a comparison of two different interventions:** Women who are tested HPV positive at  
12 enrolment will be randomized to either a patient navigation model or a cell phone model  
13 consisting of automated SMS messages. *Patient navigation model:* A trained community health  
14 worker will be identified as the woman's patient navigator. There will be established a one-to-  
15 one relationship between the patient navigator and the woman to address anticipated barriers  
16 such as communication difficulties and difficulties with arranging transportation. *Cell phone*  
17 *model:* HPV positive women will receive automatically generated SMS messages, which will  
18 convey HPV result, send appointment reminders and health information during the first 12-14  
19 months follow-up period. After 20 months, the continuity of care, based on the number of HPV  
20 positive women who return for the 1<sup>st</sup> follow-up examination after 14 months, will be  
21 compared. Additionally, the average time spent providing navigation from an HPV positive  
22 result is established to 12-14 months after and the associated cost will be calculated. Likewise  
23 the price of establishing and maintaining the system generating the SMS reminders will be  
24 measured. The differences in total costs and re-attendance between patient navigation and  
25 SMS reminders will be calculated. Re-attendance will be defined as HPV positive woman who  
26 re-attend within 12-14 months after the HPV positive result is established. Finally, HPV positive  
27 women who do not re-attend for screening after 12-14 months will be traced and interviewed.  
28 A mixed method approach, relying on structured questionnaires, in-depth interview and key  
29 informant interviews will be used to describe perceived barriers for attending 12-14 months  
30 follow-up.  
31  
32  
33

34 **Work package 5, Health service capacity building for cervical cancer**  
35 **prevention:** Health service capacity building will be performed at primary, secondary and  
36 tertiary level. At the primary and secondary levels, key barriers for optimal use of existing  
37 communication paths for ensuring continuity of care among women diagnosed with  
38 precancerous lesions will be identified through a register based desk study. Based on the  
39 results, interview guides will be developed for in-depth interviews with health providers  
40 working at primary and secondary level and community representatives. The experiences from  
41 this assessment will be used to develop a training program in cervical cancer prevention and  
42 patient navigation that will include staff at primary and secondary health units together with  
43 community health workers in Dar es Salaam and Kilimanjaro Region. The trained community  
44 health worker will be employed as patient navigators. At tertiary level, the project will respond  
45 to the research needs set forth by ORCI and KCMC. Three PhD courses, one in Clinical Trials,  
46 one in Prevention and Control of Gynaecological Cancers and one in Policy Brief Writing will be  
47 offered at KCMC in alignment with the exiting BSU initiatives at KCMC. The PhD courses will be  
48 co-developed and co-taught by Tanzanian and Danish researchers. At both ORCI and KCMC  
49 there is a need to strengthen the capacities of researchers to undertake in-country PhD  
50 training at an international level. To address this need, four PhD studies, three Tanzanian and  
51 one Danish (co funded by SDU), will be included in the project. The Tanzanian PhD students  
52 will be recruited through public announcement of the scholarships and competitive  
53 applications. Two of the Tanzanian PhD students will be enrolled at KCMC and one at ORCI.  
54 They will additionally conduct 3 months of academic work each year in Denmark. The project  
55 will be performed as a twinning arrangement where the Tanzanian and the Danish PhD  
56 students will work closely together. To increase the expertise within HPV epidemiology and  
57 HPV testing in Tanzania and thereby increase the sustainability of the project outcomes, a  
58 post-doctoral fellow, Crispin Kahesa (CK), who has obtained his PhD as part of our previous  
59 research (2-6, 9) and who is presently acting as national trainer for the cervical cancer  
60

1  
2 prevention program in Tanzania, will be employed in the project. He will be visiting Institute of  
3 Medical Virology at Tuebingen University in Germany to get detailed knowledge about HPV  
4 testing and HPV analyses. In addition, to enhance local expertise in cervical cancer screening  
5 and HPV testing, a faculty exchange to the International Agency for Research on Cancer  
6 (IARC) in Lyon will also be arranged. Finally, to further upgrade CK's academic skills he will be  
7 involved as a co-supervisor of the two PhD projects focusing on Cervical Cancer Screening and  
8 Continuity of Care and write two independent papers based on the research findings.  
9

10 Ethical research permissions will be obtained from the Ministry of Health in Tanzania and from  
11 local authorities in Dar es Salaam and Kilimanjaro. Ethical clearance will be obtained from the  
12 Ethical Review Board at KCMC and ORCI as well as from the Ethical Review Board of the  
13 National Institute of Medical Research. The project will follow the international ethical  
14 guidelines developed by CIOMS (Council for International Organization of Medical Sciences),  
15 placing particular emphasis on ensuring participant safety. Hence, women who have a positive  
16 cytology (HSIL or worse) will be called in and treated according to Tanzanian standard of care.  
17 Similarly, women who are persistently HPV positive will be traced, and liquid-based cytology  
18 samples will be obtained and analyzed. In case of a positive cytology result (HSIL or worse),  
19 the women will be offered colposcopy directed biopsies and treatment according to the cervical  
20 cancer screening national guidelines. Informed written consent will be obtained from research  
21 participants and confidentiality guaranteed. The trial will be registered at ClinicalTrials.gov and  
22 trial analyses and reports will be made in accordance with CONSORT requirements. It is an  
23 important part of the study that all women will have a cytology examination when they exit the  
24 study after 26 months and we will make sure that all women are cared for in the best possible  
25 way.  
26  
27

#### 28 **4. Expected outputs and outcomes**

29 The project will produce 4 PhD theses, at least 14 scientific papers published in international,  
30 peer-reviewed journals, at least 5 articles published in popular journals/magazines, at least 6  
31 conference papers (4 national and 2 international), and a minimum of 12 research updates and  
32 policy briefs.  
33

34  
35 The expected outcomes of the project are:

- 36 • New knowledge about the natural history of HPV infection and consequences of HPV  
37 infection among HIV positive and HIV negative women
- 38 • New approaches in performing cervical cancer screening. On the basis of the research,  
39 possible improvements of the screening program will be identified, with a particular view to  
40 implementation of HPV testing and improved continuity of care.
- 41 • A cadre of health staff and community health workers who are trained in cervical cancer  
42 control and prevention and who through an improved communication line will help facilitate  
43 on-going care and treatment to women who are screened positive
- 44 • Improved capacities among researchers to conduct interdisciplinary and internationally  
45 informed research on primary and secondary prevention of cervical cancer
- 46 • Decreased mortality from cervical cancer due to detection of precancerous lesions and  
47 earlier detection of cervical cancer
- 48 • Reduced poverty through enhancement of women's sexual and reproductive health. To a  
49 high degree cervical cancer is diagnosed in women at reproductive age and is thus leading  
50 to high numbers of premature deaths with substantial social and economic consequences at  
51 an individual level and in society. Prevention of cervical cancer will therefore have an impact  
52 on reduction of poverty and sustainable development in society.  
53  
54  
55

#### 56 **5. Relevance**

57 In Tanzania, cervical cancer is the commonest type of cancer in women, and that with the  
58 highest mortality rate. Annually, approximately 7300 new cases are diagnosed and about  
59 4200 women die from cervical cancer(11). Thus cervical cancer is a public health problem that  
60 has enormous social and economic population impact as it often affects women at reproductive

age(12). To address this public health problem, the project will provide new and important information on the natural history of HPV and how it relates to HIV, information that will be of help in the development of more efficient vaccines and screening strategies that targets HIV positive and HIV negative women. The project also aims to evaluate *CareHPV* testing (a simple to do test) as a tool for cervical cancer screening and to examine how continuity of care of women who are screened positive can be improved by two simple low cost interventions. The information generated from the project will help inform the future screening strategy in Tanzania as well as in other countries with high HIV prevalence. We will make it a priority that beside the publication of our results in scientific journals, we will communicate the results to decision makers, stakeholders and to the general population. The focus areas of our research, HPV, HIV and cervical cancer are well in line with the "Tanzanian National Health Research Policy" from 2013 that lists Communicable diseases, Non-communicable diseases and Reproductive health as top-three priority areas. Our research areas are also aligned with the Tanzanian Health Sector Strategic Plan III (HSSP III 2009-2015), supported by Danida, which also lists reproductive health and communicable and non-communicable diseases as priority areas. The project does also have relevance in relation to overall objectives and priorities of Danish development cooperation as expressed in The Right to a Better Life which states that "Denmark will be at the forefront of international efforts to promote sexual and reproductive health and rights, and in the fight against HIV/AIDS". Finally, through the linkage with KCMC, the activities are also in line with Danida priorities for research capacity building, since KCMC is one of the core institutions in the Building Stronger University (BSU) program.

## 6. Project plan

Since the project plan is complex and dynamic with interactions between multiple WPs, the key priorities will be to facilitate the necessary interactions between the WPs and to maintain the overall scientific direction over the life of the project. The project will start in January 2015 and end in December 2019. The existing ORCI and KCMC institutional bank accounts will be used for the project; and the existing financial and procurement regulations will be used for implementing the project in Tanzania. The main project milestones and timetable are shown on **Fig. 3**. The detailed budget is attached in the main application and it shows how the resource allocation in the project will be distributed between the institutions involved over the project period.

## 7. Participants, organization and management

**Julius Mwaiselage** is a medical doctor and epidemiologist and public health specialist. He is the Director of Cancer Prevention Services at ORCI. He has 9 years experiences in cancer epidemiological research in Tanzania and has been involved in various collaborative research projects focusing on HPV prevalence, cervical cancer screening and HPV vaccine introduction in Tanzania. He has authored more than 20 scientific papers in peer-reviewed journals and supervised 3 PhD students and more than 15 master's students. **Vibeke Rasch** is a gynaecologist and professor in global reproductive health. She has almost 20 years experiences in reproductive health research in Tanzania, has acted as principal responsible party in an enhancing research capacity building project in Vietnam and has been member of the BSU steering committee. She has authored more than 100 scientific publications and supervised 16 PhD students, more than half from sub-Saharan Africa and Asia. **Susanne Krüger Kjær** is a medical doctor and professor of cancer epidemiology. Her main research areas are HPV and cancer and the importance of gene-environment interactions in cancer development with a focus on clinical utility and the translational aspect. She has authored more than 350 scientific papers, and she is the Danish primary investigator on the clinical, randomised trials of the efficacy of HPV vaccination. She has supervised more than 25 Phd students. **Twalib Ngoma** is a professor of oncology. He has more than 25 years of experience in teaching, clinical work and research related to cancer. He is the executive director of ORCI and the head of clinical oncology department of Muhimbili University College of Health and Allied Science. **Rachel Manongi** is Head of Community Medicine Department at KCMC, she has a record of community based research with a special focus on HIV prevention and sustainable health promotion and has also been active in the establishment of a cervical cancer registry at KCMC. She has authored more than 40 papers in international journals.

1  
2  
3 The project builds on and extends existing collaboration between these Tanzanian and Danish  
4 researchers. The involved Danish researchers have solid experience in research capacity  
5 building in Tanzania and in HPV research and both have strong publication records. The  
6 proposed project will be undertaken in close coordination with the research capacity building  
7 activities conducted within the BSU initiative. The overall responsibility for the project lies with  
8 the main Tanzanian applicant. To facilitate cross-country project management, a Steering  
9 Board will be established between Tanzanian and Danish collaborators. A project management  
10 unit(PMU) will be established at ORCI. The PMU will consist of a project secretary and an  
11 accountant and will be responsible for day-to-day activities. To monitor the activities, a web-  
12 based project management tool will be established. The web tool will include detailed updated  
13 work plans linked to the work packages so partners can track project progress. Project  
14 documents will be available on the web-site. Members of the Steering Board will meet on a  
15 regular basis to ensure a continuous progress of the study. In addition, annual workshop  
16 meetings will be held with representatives from the partner institutions.  
17  
18

### 19 **8. Project's international dimension**

20 There is a great international interest in cervical cancer prevention focusing on different  
21 screening modalities, HPV testing and HPV vaccination, and it is one of the areas where  
22 substantial progress has been made in recent years and it is also one of the areas where  
23 research has the greatest translational potential. The suggested project relies heavily on  
24 collaboration between researchers in Tanzania, Denmark, Germany and France who have  
25 strong expertise in HPV epidemiology, HPV testing technology, cervical cancer screening  
26 approaches, and international health. Through this international collaboration, we will obtain a  
27 strong and valuable synergy. By means of this project there will be a great opportunity for  
28 transfer of knowledge and technology to Tanzania, which in a longer perspective may be  
29 further transferred to neighbouring sub-Saharan African countries with similar high prevalence  
30 rates of HPV and HIV.  
31  
32

### 33 **9. New knowledge**

34 Virtually all cases of cervical cancers and high-grade precursor lesions are caused by a  
35 persistent infection with HPV(13). Although effective prophylactic vaccines against HPV have  
36 been developed, they are still relatively expensive and logistically demanding as they currently  
37 require a 3-dose regimen. Furthermore, they do not treat already existing HPV infections and  
38 related diseases. Several African cross-sectional studies of the prevalence of HPV have been  
39 performed, including our own from Tanzania where we found an HPV prevalence of 20.1%  
40 among 3700 women(2). In the same study we found that 9.3% of the women were HIV  
41 positive. In contrast, only few prospective studies on HPV epidemiology have been conducted  
42 in Africa. Of these, some had a limited sample size (14), some did only include HIV negative  
43 women(9) or exclusively used self-sampled cervical swabs(15). In spite of the fact that  
44 cervical cancer is the most common malignancy among women in Sub-Saharan Africa(1), little  
45 is known about the distribution of HPV types, independent risk factors of incidence and  
46 patterns of persistence for different HPV types. Even though HPV16 has been found to be  
47 common in sub-Saharan African women, some studies have reported HPV52 and HPV58 to be  
48 more prevalent(2). Data on which HPV types are more likely to persist in relation to HIV status  
49 are scarce, particularly in HIV positive individuals. Results from the proposed study will add  
50 important information to our knowledge about the natural history of HPV in an HIV high-risk  
51 area and will be helpful in tailoring screening programs to match the needs of HIV positive and  
52 HIV negative women.  
53  
54

55 The conventional cytology screening (Pap smear followed by colposcopically-directed biopsies)  
56 demands costly cytology laboratories with skilled and highly experienced personnel, and  
57 multiple visits at regular intervals are needed. Consequently, the Pap smear screening is  
58 neither sufficiently developed nor sustainable in less developed countries(16). Therefore, cost  
59 effective methods such as VIA have been adopted in several countries for early detection of  
60 precancerous lesions. In 2002 cervical cancer screening based on VIA was implemented at

ORCI and the program has subsequently been scaled up to cover other regions in Tanzania. However, several studies, including our own recent study, have found VIA to have a limited sensitivity(4). In contrast, HPV screening is appealing due to a higher sensitivity and a higher negative predictive value(17). However, successful HPV screening in countries with limited resources requires a simple HPV test that will perform well also in remote areas and which is affordable. Finally, self-sampling will most likely be needed to make screening practical in some settings. . In relation to these issues, our study will contribute new knowledge which can immediately be used and implemented to the benefit of the women.

A successful programme for cervical cancer prevention requires function in its entirety. The programme should ensure high levels of screening coverage of the target population, offer high quality services, have good referral systems that guarantee patient follow-up and make certain that women receive appropriate treatment. Experiences from Tanzania mainland have documented that these preconditions are often not adhered to due to a poor functioning health system and as a consequence the screening results are often not conveyed and proper action not always taken. Currently, there is no mechanism in place in Tanzania to help women navigate between the potential barriers, which may be hindering factors for obtaining confirmatory diagnosis and adequate treatment of cervical precancerous lesions. Mobile Health, which implies the use of mobile communication devices for health care, is seen as a complementary strategy for strengthening health systems and the use of SMS has successfully been used to remind patients to take drugs and attend appointment e.g.in Kenya(18). Similarly, members of our research team have documented the effect of SMS on antenatal care attendance and skilled delivery attendance in Tanzania(7).The Patient Navigation Model is an alternative approach to enhance continuity of care among underserved populations. The navigators can be trained community health workers or peer educators who provide support and guidance (19). Patient navigation is used as a standard of care in most of Western oncological departments and has been proven to be successful in several studies e.g: Cancer control among urban African American (20) and Breast cancer screening(21). Understanding the acceptance of these two proposed models among Tanzanian women detected to have HPV will help health care professionals to develop more effective continuum of care programs by promoting attendance to HPV screening and follow-up of disease progression.

#### **10. Publication and dissemination strategy**

The research findings will be communicated via a project website, scientific paper in peer-reviewed journals and popular articles. Further to get maximum impact of the findings, a stakeholder workshop focusing on cervical cancer screening and continuity of care will be held at the beginning and at the end of the project. The invitees will include Women's groups representatives, civil society, health care providers, health sector officials and researchers. The workshop will involve stakeholders in the formulation of intervention strategies, which will enhance continuity of care among women who are screened positive. Further, at the end of the project period a policy brief workshop facilitated by a communication expert will be held and will result in the formulation of a policy brief that summarizes the research findings and provides recommendations to decision makers. The policy brief will be produced and shared at a national dissemination seminar where health policy makers, Danida representatives and other relevant stakeholder are invited.

#### **11. Strategy for phasing out of the project**

The project will be undertaken in cooperation with Ministry of Health officials and with health system representatives. Based on the research conducted within each work package, concrete recommendations for improved cervical cancer prevention will be developed and shared with health policy makers and other stakeholders. Since the PI is Director of Cancer Preventive service in Tanzania at ORCI and a member of the Ministry of Health technical working group for cervical cancer prevention and control in Tanzania, he will ensure the recommendations of the project are sent to the respective authorities and implemented. Initially most of the technical recommendations from the project will be implemented at ORCI, KCMC and among cervical cancer screening implementing partners in Tanzania after update of the cervical cancer

screening national service delivery guidelines. Furthermore, through a phased and participatory approach, the policy recommendations for the Ministry of Health, will be discussed at the relevant level of authority in order to ensure the updated policy guidelines and ministerial circulars for cervical cancer include the project recommendations on improvement, particularly on continuity of care. The Tanzanian post-doctoral and PhD students will be in the forefront in the implementation and sustainability of the comprehensive cervical cancer prevention in Tanzania given the knowledge and skills obtained in the project; and it is anticipated that they will be employed by ORCI and KCMC or even at the Ministry of Health. The established cohort of HPV positive women will be kept and maintained at ORCI for future studies on HPV persistence and clearance patterns and women's absolute risk of subsequently developing precancerous lesions (17).

**Fig. 1: Natural history of human papillomavirus (HPV) infection and cervical precancerous lesions**

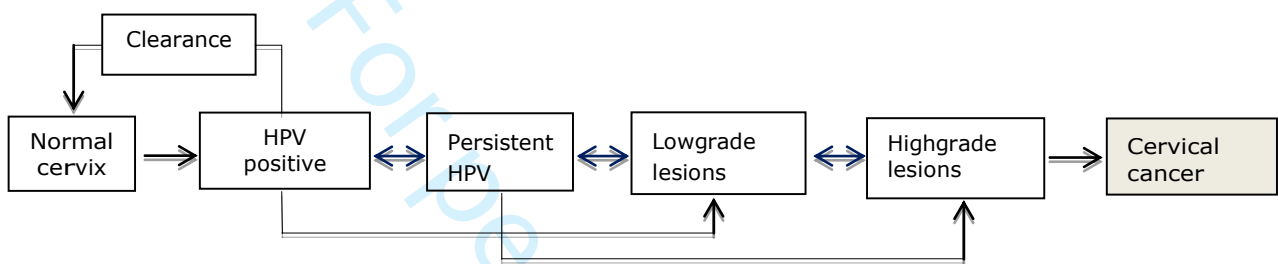

**Fig 2: The schematic overview of the study design**

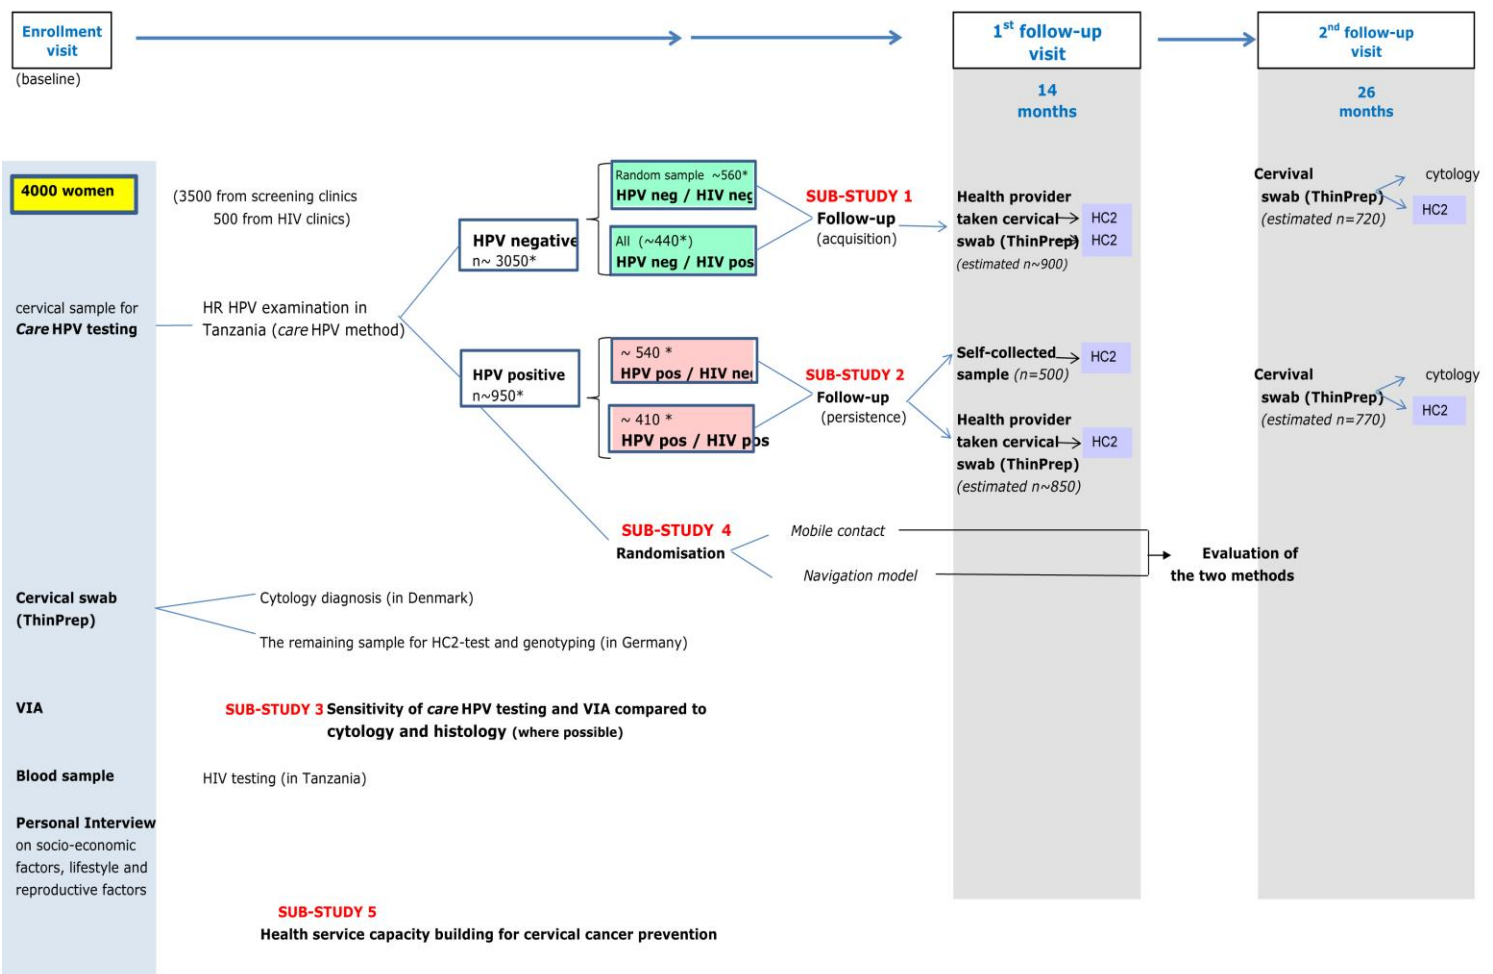

\* numbers estimated on the basis of recent finding in Tanzania (Dartell et al)

**Fig 3: The schematic overview of the project milestones and timetable**

| FIG 3: THE SCHEMATIC OVERVIEW OF THE PROJECT MILESTONES AND TIMETABLE                                                                                                                                                                                                                                                                                        |        |        |        |       |       |       |       |       |            |           |       |       |       |       |       |       |       |       |      |            |               |  |
|--------------------------------------------------------------------------------------------------------------------------------------------------------------------------------------------------------------------------------------------------------------------------------------------------------------------------------------------------------------|--------|--------|--------|-------|-------|-------|-------|-------|------------|-----------|-------|-------|-------|-------|-------|-------|-------|-------|------|------------|---------------|--|
| MILESTONES                                                                                                                                                                                                                                                                                                                                                   | 2015   |        |        |       | 2016  |       |       |       | 2017       |           |       |       | 2018  |       |       |       | 2019  |       |      |            | Work packages |  |
|                                                                                                                                                                                                                                                                                                                                                              | Q1     | Q2     | Q3     | Q4    | Q1    | Q2    | Q3    | Q4    | Q1         | Q2        | Q3    | Q4    | Q1    | Q2    | Q3    | Q4    | Q1    | Q2    | Q3   | Q4         |               |  |
| Project commencement                                                                                                                                                                                                                                                                                                                                         | Yellow | Yellow |        |       |       |       |       |       |            |           |       |       |       |       |       |       |       |       |      |            | WP1,2,3,4,5   |  |
| Announcement and recruitment of PhD students                                                                                                                                                                                                                                                                                                                 | Green  | Green  |        |       |       |       |       |       |            |           |       |       |       |       |       |       |       |       |      |            | WP1,2,3,4     |  |
| Enrollment of PhD students into universities                                                                                                                                                                                                                                                                                                                 |        |        | Blue   |       |       |       |       |       |            |           |       |       |       |       |       |       |       |       |      |            | WP1,2,3,4     |  |
| PhD students attending university PhD program                                                                                                                                                                                                                                                                                                                |        |        |        | Brown | Brown | Brown | Brown | Brown | Brown      | Brown     | Brown | Brown | Brown | Brown | Brown | Brown |       |       |      |            | WP1,2,3,4     |  |
| Establishment of research sites                                                                                                                                                                                                                                                                                                                              |        |        | Blue   | Blue  |       |       |       |       |            |           |       |       |       |       |       |       |       |       |      |            | WP1,2,3,4     |  |
| Recruitment and training of research assistants                                                                                                                                                                                                                                                                                                              |        |        | Yellow |       |       |       |       |       |            |           |       |       |       |       |       |       |       |       |      |            | WP1,2,3,4     |  |
| Data and specimen collection in Tanzania                                                                                                                                                                                                                                                                                                                     |        |        | Red    | Red   | Red   | Red   | Red   | Red   | Red        | Red       | Red   | Red   | Red   | Red   | Red   | Red   |       |       |      |            | WP1,2,3       |  |
| Randomization of women                                                                                                                                                                                                                                                                                                                                       |        |        | Red    | Red   | Red   |       |       |       |            |           |       |       |       |       |       |       |       |       |      |            | WP4           |  |
| Assessment of continuity of care among randomized women                                                                                                                                                                                                                                                                                                      |        |        |        |       |       |       |       |       | Pink       | Pink      | Pink  | Pink  |       |       |       |       |       |       |      |            | WP4           |  |
| Conducting PhD courses                                                                                                                                                                                                                                                                                                                                       |        |        |        |       |       | Blue  |       |       |            | Dark Blue |       |       |       |       |       |       |       |       |      |            | WP5           |  |
| Postdoc fellow attached in research institution in France and Germany                                                                                                                                                                                                                                                                                        |        |        |        |       |       |       |       |       | Light Blue |           |       |       |       |       | Green |       |       |       |      |            | WP5           |  |
| Publications                                                                                                                                                                                                                                                                                                                                                 |        |        |        |       |       |       |       |       | Blue       | Blue      | Blue  | Blue  | Blue  | Blue  | Blue  | Blue  | Blue  | Blue  | Blue | Blue       | WP1,2,3,4,5   |  |
| PhD thesis submissions                                                                                                                                                                                                                                                                                                                                       |        |        |        |       |       |       |       |       |            |           |       |       |       |       |       |       | Brown | Brown |      |            | WP1,2,3,4     |  |
| Defence of PhD thesis                                                                                                                                                                                                                                                                                                                                        |        |        |        |       |       |       |       |       |            |           |       |       |       |       |       |       |       |       | Grey | Grey       | WP1,2,3,4     |  |
| Dissemination of research findings                                                                                                                                                                                                                                                                                                                           |        |        |        |       |       |       |       |       |            |           |       |       |       |       |       |       |       |       |      | Light Blue | WP1,2,3,4,5   |  |
| Project completion and phasing out                                                                                                                                                                                                                                                                                                                           |        |        |        |       |       |       |       |       |            |           |       |       |       |       |       |       |       |       |      | Dark Grey  | WP1,2,3,4,5   |  |
| <p><b>Note:</b> Project commencement involves planning meeting of researchers, setting up of the project office, and ensuring ethical clearance is obtained from relevant bodies</p> <p><b>Note:</b> Project completion involves writing of the final project report, final auditing of the project, phasing out of the project to ensure sustainability</p> |        |        |        |       |       |       |       |       |            |           |       |       |       |       |       |       |       |       |      |            |               |  |

## 12. Main References

1. **Ferlay J**, Shin HR, Bray F, Forman D, Mathers C, Parkin DM. Estimates of worldwide burden of cancer in 2008: GLOBOCAN 2008. *International Journal of Cancer* 2010 Dec 15;127(12):2893-917.
2. **Dartell M**, Rasch V, Kahesa C, Mwaiselage J, Ngoma T, Junge J, et al. Human papillomavirus prevalence and type distribution in 3603 HIV-positive and HIV-negative women in the general population of Tanzania: the PROTECT study. *Sexually Transmitted Diseases*. 2012 Mar;39(3):201-8.
3. **Dartell M**, Rasch V, Munk C, Kahesa C, Mwaiselage J, Iftner T, et al. Risk factors for high-risk human papillomavirus detection among HIV-negative and HIV-positive women from Tanzania. *Sexually Transmitted Diseases*. 2013 Sep;40(9):737-43.
4. **Dartell MA**, Rasch V, Iftner T, Kahesa C, Mwaiselage JD, Junge J, et al. Performance of visual inspection with acetic acid and human papillomavirus testing for detection of high-grade cervical lesions in HIV positive and HIV negative Tanzanian women. *International Journal of Cancer* 2014 Jan 4. PubMed PMID: 24391021. Epub 2014/01/07. Eng.
5. **Kahesa C**, Kjaer S, Mwaiselage J, Ngoma T, Tersbol B, Dartell M, et al. Determinants of acceptance of cervical cancer screening in Dar es Salaam, Tanzania. *BMC Public Health*. 2012;12:1093.
6. **Kahesa C**, Kjaer SK, Ngoma T, Mwaiselage J, Dartell M, Iftner T, et al. Risk factors for VIA positivity and determinants of screening attendances in Dar es Salaam, Tanzania. *BMC Public Health*. 2012;12:1055. PubMed PMID: 23216752.
7. **Lund S**, Hemed M, Nielsen BB, Said A, Said K, Makungu MH, et al. Mobile phones as a health communication tool to improve skilled attendance at delivery in Zanzibar: a cluster-randomised controlled trial. *BJOG* 2012 Sep;119(10):1256-64. PubMed PMID: 22805598.
8. **Nielsen A**, Iftner T, Munk C, Kjaer SK. Acquisition of high-risk human papillomavirus infection in a population-based cohort of Danish women. *Sexually Transmitted Diseases* 2009 Oct;36(10):609-15.
9. **Fukuchi E**, Sawaya GF, Chirenje M, Magure T, Tuveson J, Ma Y, et al. Cervical human papillomavirus incidence and persistence in a cohort of HIV-negative women in Zimbabwe. *Sexually Transmitted Diseases*. 2009 May;36(5):305-11. PubMed PMID: 19295468.
10. **Olesen TB**, Iftner T, Mwaiselage J, Kahesa C, Rasch V, Ngoma T, et al. Prevalence and type distribution of human papillomavirus among 1813 men in Tanzania and the relationship to HIV status. *Sexually Transmitted Diseases*. 2013 Jul;40(7):592-8. PubMed PMID: 23965778. Epub 2013/08/24. eng.
11. Human Papillomavirus and Related Diseases in Tanzania. Summary Report [Internet]. ICO Information Centre on HPV and Cancer.
12. **Chokunonga E**, Borok MZ, Chirenje ZM, Nyakabau AM, Parkin DM. Trends in the incidence of cancer in the black population of Harare, Zimbabwe 1991-2010. *International Journal of Cancer* 2013 Aug 1;133(3):721-9. PubMed PMID: 23364833. Epub 2013/02/01. eng.
13. **Kjaer SK**, van den Brule AJ, Bock JE, Poll PA, Engholm G, Sherman ME, et al. Human papillomavirus-the most significant risk determinant of cervical intraepithelial neoplasia. *International Journal of Cancer* 1996 Mar 1;65(5):601-6.
14. **Veldhuijzen NJ**, Vyankandondera J, van de Wijgert JH. HIV acquisition is associated with prior high-risk human papillomavirus infection among high-risk women in Rwanda. *AIDS (London, England)*. 2010 Sep 10;24(14):2289-92. PubMed PMID: 20613457. Epub 2010/07/09. eng.
15. **Safaeian M**, Kiddugavu M, Gravitt PE, Gange SJ, Ssekasanvu J, Murokora D, et al. Determinants of incidence and clearance of high-risk human papillomavirus infections in rural Rakai, Uganda. *Cancer Epidemiology, Biomarkers & Prevention* 2008 Jun;17(6):1300-7.
16. **Denny L**. Cytological screening for cervical cancer prevention. *Best practice & research Clinical obstetrics & gynaecology*. 2012 Apr;26(2):189-96. PubMed PMID: 22071306. Epub 2011/11/11. eng.
17. **Kjaer SK**, Frederiksen K, Munk C, Iftner T. Long-term absolute risk of cervical intraepithelial neoplasia grade 3 or worse following human papillomavirus infection: role of persistence. *Journal of the National Cancer Institute*. 2010 Oct 6;102(19):1478-88. PubMed PMID: 20841605.
18. **Lester RT**, Ritvo P, Mills EJ, Kariri A, Karanja S, Chung MH, et al. Effects of a mobile phone short message service on antiretroviral treatment adherence in Kenya (WelTel Kenya1): a randomised trial. *Lancet*. 2010 Nov 27;376(9755):1838-45. PubMed PMID: 21071074.
19. **Honeycutt S**, Green R, Ballard D, Hermstad A, Brueder A, Haardorfer R, et al. Evaluation of a patient navigation program to promote colorectal cancer screening in rural Georgia, USA. *Cancer*. 2013 Aug 15;119(16):3059-66. PubMed PMID: 23719894.
20. **Halbert CH**, Briggs V, Bowman M, Bryant B, Bryant DC, Delmoor E, et al. Acceptance of a community-based navigator program for cancer control among urban African Americans. *Health education research*. 2014 Feb;29(1):97-108. PubMed PMID: 24173501.
21. **Lee JH**, Fulp W, Wells KJ, Meade CD, Calcano E, Roetzheim R. Patient navigation and time to diagnostic resolution: results for a cluster randomized trial evaluating the efficacy of patient navigation among patients with breast cancer screening abnormalities, Tampa, FL. *PloS one*. 2013;8(9):e74542. PubMed PMID:



STROBE Statement—Checklist of items that should be included in reports of *cohort studies*

|                              | Item No | Recommendation                                                                                                                                                                       | Response                                                                                                                                                                                                          |
|------------------------------|---------|--------------------------------------------------------------------------------------------------------------------------------------------------------------------------------------|-------------------------------------------------------------------------------------------------------------------------------------------------------------------------------------------------------------------|
| Title and abstract           | 1       | (a) Indicate the study's design with a commonly used term in the title or the abstract                                                                                               | Indicated as Cohort in all appropriate sections                                                                                                                                                                   |
|                              |         | (b) Provide in the abstract an informative and balanced summary of what was done and what was found                                                                                  | Indicated in the section "abstract"                                                                                                                                                                               |
| <b>Introduction</b>          |         |                                                                                                                                                                                      |                                                                                                                                                                                                                   |
| Background/rationale         | 2       | Explain the scientific background and rationale for the investigation being reported                                                                                                 | Explanation provided in the "Introduction" section                                                                                                                                                                |
| Objectives                   | 3       | State specific objectives, including any prespecified hypotheses                                                                                                                     | These has been provided in ll. "108-113"                                                                                                                                                                          |
| <b>Methods</b>               |         |                                                                                                                                                                                      |                                                                                                                                                                                                                   |
| Study design                 | 4       | Present key elements of study design early in the paper                                                                                                                              | Indicated in the sub section "study design and study population", ll. 117-143.                                                                                                                                    |
| Setting                      | 5       | Describe the setting, locations, and relevant dates, including periods of recruitment, exposure, follow-up, and data collection                                                      | Indicated in the sub sections "study design and study population", ll. 117-143; "assessment of exposure, ll. 147-195; "outcome measures; ll. 198-205; "table 1: Overview of data collected in the CONCEPT cohort" |
| Participants                 | 6       | (a) Give the eligibility criteria, and the sources and methods of selection of participants. Describe methods of follow-up                                                           | Indicated in the sub sections "study design and study population", ll. 117-143; "assessment of exposure, ll. 147-195; "outcome measures; ll. 198-205.                                                             |
|                              |         | (b) For matched studies, give matching criteria and number of exposed and unexposed                                                                                                  | NA - No matching was done                                                                                                                                                                                         |
| Variables                    | 7       | Clearly define all outcomes, exposures, predictors, potential confounders, and effect modifiers. Give diagnostic criteria, if applicable                                             | Indicated in the sub sections "assessment of exposure, ll. 147-195; "outcome measures; ll. 198-205                                                                                                                |
| Data sources/<br>measurement | 8*      | For each variable of interest, give sources of data and details of methods of assessment (measurement). Describe comparability of assessment methods if there is more than one group | Description of this item has been provided in table 1- Overview of data collection                                                                                                                                |
| Bias                         | 9       | Describe any efforts to address potential sources of bias                                                                                                                            | This has been described in section                                                                                                                                                                                |

|    |                        |     |                                                                                                                                                                                                   |  |
|----|------------------------|-----|---------------------------------------------------------------------------------------------------------------------------------------------------------------------------------------------------|--|
|    |                        |     | “What is being measured”                                                                                                                                                                          |  |
| 1  |                        |     |                                                                                                                                                                                                   |  |
| 2  | Study size             | 10  | Explain how the study size was arrived at                                                                                                                                                         |  |
| 3  | Quantitative variables | 11  | Explain how quantitative variables were handled in the analyses. If applicable, describe which groupings were chosen and why                                                                      |  |
| 4  |                        |     |                                                                                                                                                                                                   |  |
| 5  |                        |     |                                                                                                                                                                                                   |  |
| 6  |                        |     |                                                                                                                                                                                                   |  |
| 7  |                        |     |                                                                                                                                                                                                   |  |
| 8  |                        |     |                                                                                                                                                                                                   |  |
| 9  |                        |     |                                                                                                                                                                                                   |  |
| 10 | Statistical methods    | 12  | (a) Describe all statistical methods, including those used to control for confounding                                                                                                             |  |
| 11 |                        |     |                                                                                                                                                                                                   |  |
| 12 |                        |     |                                                                                                                                                                                                   |  |
| 13 |                        |     |                                                                                                                                                                                                   |  |
| 14 |                        |     |                                                                                                                                                                                                   |  |
| 15 |                        |     |                                                                                                                                                                                                   |  |
| 16 |                        |     |                                                                                                                                                                                                   |  |
| 17 |                        |     |                                                                                                                                                                                                   |  |
| 18 |                        |     |                                                                                                                                                                                                   |  |
| 19 |                        |     |                                                                                                                                                                                                   |  |
| 20 |                        |     |                                                                                                                                                                                                   |  |
| 21 |                        |     |                                                                                                                                                                                                   |  |
| 22 |                        |     |                                                                                                                                                                                                   |  |
| 23 |                        |     |                                                                                                                                                                                                   |  |
| 24 |                        |     |                                                                                                                                                                                                   |  |
| 25 |                        |     |                                                                                                                                                                                                   |  |
| 26 |                        |     |                                                                                                                                                                                                   |  |
| 27 |                        |     |                                                                                                                                                                                                   |  |
| 28 |                        |     |                                                                                                                                                                                                   |  |
| 29 |                        |     |                                                                                                                                                                                                   |  |
| 30 |                        |     |                                                                                                                                                                                                   |  |
| 31 |                        |     |                                                                                                                                                                                                   |  |
| 32 |                        |     |                                                                                                                                                                                                   |  |
| 33 | <b>Results</b>         |     |                                                                                                                                                                                                   |  |
| 34 | Participants           | 13* | (a) Report numbers of individuals at each stage of study—eg numbers potentially eligible, examined for eligibility, confirmed eligible, included in the study, completing follow-up, and analysed |  |
| 35 |                        |     |                                                                                                                                                                                                   |  |
| 36 |                        |     |                                                                                                                                                                                                   |  |
| 37 |                        |     |                                                                                                                                                                                                   |  |
| 38 |                        |     |                                                                                                                                                                                                   |  |
| 39 |                        |     |                                                                                                                                                                                                   |  |
| 40 |                        |     |                                                                                                                                                                                                   |  |
| 41 | Descriptive data       | 14* | (a) Give characteristics of study participants (eg demographic, clinical, social) and information on exposures                                                                                    |  |
| 42 |                        |     |                                                                                                                                                                                                   |  |

|                          |     |                                                                                                                                                                                                              |                                                                                                                      |
|--------------------------|-----|--------------------------------------------------------------------------------------------------------------------------------------------------------------------------------------------------------------|----------------------------------------------------------------------------------------------------------------------|
|                          |     | and potential confounders                                                                                                                                                                                    | participants and their distribution has been provided in Table 2                                                     |
|                          |     | (b) Indicate number of participants with missing data for each variable of interest                                                                                                                          | Information on missing values has been provided for each variable in Table 2 & Table 3                               |
|                          |     | (c) Summarise follow-up time (eg, average and total amount)                                                                                                                                                  |                                                                                                                      |
| Outcome data             | 15* | Report numbers of outcome events or summary measures over time                                                                                                                                               | Table 2 and 3 provide a measure of important events at a baseline and follow-up                                      |
| Main results             | 16  | (a) Give unadjusted estimates and, if applicable, confounder-adjusted estimates and their precision (eg, 95% confidence interval). Make clear which confounders were adjusted for and why they were included | Table 3 provides Confidence interval of the important outcome measures at baseline and on follow up                  |
|                          |     | (b) Report category boundaries when continuous variables were categorized                                                                                                                                    |                                                                                                                      |
|                          |     | (c) If relevant, consider translating estimates of relative risk into absolute risk for a meaningful time period                                                                                             | NA                                                                                                                   |
| Other analyses           | 17  | Report other analyses done—eg analyses of subgroups and interactions, and sensitivity analyses                                                                                                               | NA                                                                                                                   |
| <b>Discussion</b>        |     |                                                                                                                                                                                                              |                                                                                                                      |
| Key results              | 18  | Summarise key results with reference to study objectives                                                                                                                                                     | NA. Cohort profile. However, summarized in “abstract”.                                                               |
| Limitations              | 19  | Discuss limitations of the study, taking into account sources of potential bias or imprecision. Discuss both direction and magnitude of any potential bias                                                   | Indicated in the section “Strengths and limitations, ll. 264-273                                                     |
| Interpretation           | 20  | Give a cautious overall interpretation of results considering objectives, limitations, multiplicity of analyses, results from similar studies, and other relevant evidence                                   | NA. Cohort profile                                                                                                   |
| Generalisability         | 21  | Discuss the generalisability (external validity) of the study results                                                                                                                                        | NA. Cohort profile. However, a the section “future plans”, ll. 276-284 indicates future perspectives for the cohort. |
| <b>Other information</b> |     |                                                                                                                                                                                                              |                                                                                                                      |
| Funding                  | 22  | Give the source of funding and the role of the funders for the present study and, if applicable, for the original study on which the present article is based                                                | Indicated in the section “financial disclosure, ll. 294-296.                                                         |

\*Give information separately for exposed and unexposed groups.

1  
2  
3  
4  
5  
6  
7  
8  
9  
10  
11  
12  
13  
14  
15  
16  
17  
18  
19  
20  
21  
22  
23  
24  
25  
26  
27  
28  
29  
30  
31  
32  
33  
34  
35  
36  
37  
38  
39  
40  
41  
42  
43  
44  
45  
46

**Note:** An Explanation and Elaboration article discusses each checklist item and gives methodological background and published examples of transparent reporting. The STROBE checklist is best used in conjunction with this article (freely available on the Web sites of PLoS Medicine at <http://www.plosmedicine.org/>, Annals of Internal Medicine at <http://www.annals.org/>, and Epidemiology at <http://www.epidem.com/>). Information on the STROBE Initiative is available at <http://www.strobe-statement.org>.

For peer review only

Study number

# Concept

## Comprehensive Prevention of Cervical Cancer in Tanzania

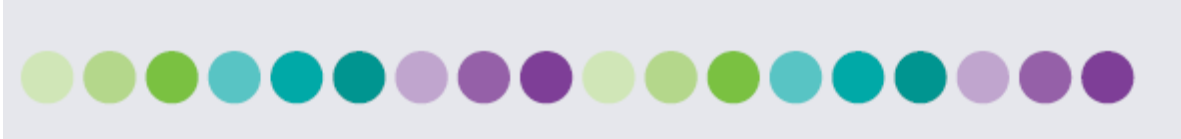

Study site: ORCI  KCMC  MAGOMENI  MAWENZI

Date \_\_\_\_\_ Study number \_\_\_\_\_

Health Provider Initials \_\_\_\_\_ Participant initials \_\_\_\_\_

## BACKGROUND

1.

How old are you?

years

2. Are you:

|                              |                            |
|------------------------------|----------------------------|
| Married, monogamous          | 1 <input type="checkbox"/> |
| Married, polygamous          | 2 <input type="checkbox"/> |
| Cohabiting                   | 3 <input type="checkbox"/> |
| Single, with regular partner | 4 <input type="checkbox"/> |
| Single, no regular partner   | 5 <input type="checkbox"/> |
| Divorced/ Widow              | 6 <input type="checkbox"/> |

How long have you known your husband / cohabiter / regular partner?

years   months

3. With whom are you presently living?

|                     |                            |
|---------------------|----------------------------|
| Husband / cohabiter | 1 <input type="checkbox"/> |
| Parents             | 2 <input type="checkbox"/> |
| Parents in law      | 3 <input type="checkbox"/> |
| Other relatives     | 4 <input type="checkbox"/> |
| Friends             | 5 <input type="checkbox"/> |
| Nobody              | 6 <input type="checkbox"/> |

1  
2  
3  
4  
5  
6  
7  
8  
9  
10  
11  
12  
13  
14  
15  
16  
17  
18  
19

4. What is the highest level of formal education you have completed?

|                        |                            |
|------------------------|----------------------------|
| No formal education    | 1 <input type="checkbox"/> |
| Standard 1-4           | 2 <input type="checkbox"/> |
| Standard 5-7           | 3 <input type="checkbox"/> |
| Form 1-4               | 4 <input type="checkbox"/> |
| Form 5-6               | 5 <input type="checkbox"/> |
| University/college     | 6 <input type="checkbox"/> |
| Other _____<br>Specify | 8 <input type="checkbox"/> |

20  
21  
22  
23

5. What is your religion?

|                        |                            |
|------------------------|----------------------------|
| Christian              | 1 <input type="checkbox"/> |
| Muslim                 | 2 <input type="checkbox"/> |
| Other _____<br>Specify | 3 <input type="checkbox"/> |

24  
25  
26  
27  
28  
29  
30  
31  
32  
33

**LIFESTYLE HABITS AND HEALTH**

34  
35  
36  
37  
38

6. Do you smoke cigarettes?

|                                 |                            |
|---------------------------------|----------------------------|
| Yes, every day                  | <input type="checkbox"/> 1 |
| Yes, at least once a week       | <input type="checkbox"/> 2 |
| Yes, but less than once a week  | <input type="checkbox"/> 3 |
| No, but I previously smoked     | <input type="checkbox"/> 4 |
| No, never → (go to question 11) | <input type="checkbox"/> 5 |

39  
40  
41  
42  
43  
44  
45  
46  
47  
48  
49  
50  
51  
52

7. How old were you, when you started to smoke cigarettes regularly?

(i.e. at least once a week)

age \_\_\_\_\_ years

53  
54  
55  
56  
57  
58  
59  
60

8. How many years have you smoked cigarettes regularly? (subtract periods of smoking cessation)

number of years: \_\_\_\_\_

1  
2  
3  
4 **9. If you are a current smoker, how much do you smoke on an average day?**

5  
6  
7  
8  
9  
10  
11  
12  
13  
14  
15  
16  
17  
18  
19  
20  
21  
22  
23  
24  
25  
26  
27  
28  
29  
30  
31  
32  
33  
34  
35  
36  
37  
38  
39  
40  
41  
42  
43  
44  
45  
46  
47  
48  
49  
50  
51  
52  
53  
54  
55  
56  
57  
58  
59  
60

number of cigarettes: \_\_\_\_\_

**10. If you no longer smoke cigarettes, how old were you when you stopped smoking?**

age \_\_\_\_\_ years

**11. Have you ever drunk alcohol and if yes, how old were you when you started drinking alcohol?**

| Have never been drinking                                     | 12 years or younger                   | 13-14 years                           | 15-16 years                           | 17-18 years                           | 19-20 years                           | 21 years or older                     |
|--------------------------------------------------------------|---------------------------------------|---------------------------------------|---------------------------------------|---------------------------------------|---------------------------------------|---------------------------------------|
| <input type="checkbox"/> <sub>1</sub><br>(Go to question 14) | <input type="checkbox"/> <sub>2</sub> | <input type="checkbox"/> <sub>3</sub> | <input type="checkbox"/> <sub>4</sub> | <input type="checkbox"/> <sub>5</sub> | <input type="checkbox"/> <sub>6</sub> | <input type="checkbox"/> <sub>7</sub> |

**12. How much per week do you usually drink of the following types of alcohol?**

|            |                                           |                      |
|------------|-------------------------------------------|----------------------|
| Beer       | No. of <u>glasses</u> per week on average | <input type="text"/> |
| Local brew | No. of <u>drinks</u> per week on average  | <input type="text"/> |
| Wine       | No. of <u>glasses</u> per week on average | <input type="text"/> |
| Liquor     | No. of <u>drinks</u> per week on average  | <input type="text"/> |

(1 bottle of wine = 6 glasses, 1 bottle of liquor = 20 drinks, 1 bottle of beer = 2 glasses)

**13. How many times per month on average do you have more than 6 drinks on the same occasion?**

| Never                                 | Less than once a <u>month</u>         | 1-3 times per <u>month</u>            | 4-8 times per <u>month</u>            | <u>≥ 9 times per month</u>            |
|---------------------------------------|---------------------------------------|---------------------------------------|---------------------------------------|---------------------------------------|
| <input type="checkbox"/> <sub>1</sub> | <input type="checkbox"/> <sub>2</sub> | <input type="checkbox"/> <sub>3</sub> | <input type="checkbox"/> <sub>4</sub> | <input type="checkbox"/> <sub>5</sub> |

**14. How do you regard your own health?**

|                                       |                                       |                                       |                                       |                                       |
|---------------------------------------|---------------------------------------|---------------------------------------|---------------------------------------|---------------------------------------|
| Excellent                             | Very good                             | Good                                  | Less good                             | Bad                                   |
| <input type="checkbox"/> <sub>1</sub> | <input type="checkbox"/> <sub>2</sub> | <input type="checkbox"/> <sub>3</sub> | <input type="checkbox"/> <sub>4</sub> | <input type="checkbox"/> <sub>5</sub> |



15. How do you perceive your body size?

|                            |                            |                            |                            |                            |
|----------------------------|----------------------------|----------------------------|----------------------------|----------------------------|
| Much too thick             | A little too thick         | Good                       | A little too thin          | Much too thin              |
| <input type="checkbox"/> 1 | <input type="checkbox"/> 2 | <input type="checkbox"/> 3 | <input type="checkbox"/> 4 | <input type="checkbox"/> 5 |

**REPRODUCTIVE HEALTH and SEXUAL HABITS**

16. Have you ever been pregnant?

|       |                                                |
|-------|------------------------------------------------|
| - yes | 1 <input type="checkbox"/>                     |
| - no  | 2 <input type="checkbox"/> → Go to question 17 |

**If yes:**

|                             |                        |
|-----------------------------|------------------------|
| Total number of pregnancies | 1 <input type="text"/> |
| Total number of births      | 2 <input type="text"/> |

How old were you at the first pregnancy?  years

How old were you when you gave birth to your first child?  years

17. Did you ever have a sexual partner?

|       |                                              |
|-------|----------------------------------------------|
| - yes | 1 <input type="checkbox"/>                   |
| - no  | 2 <input type="checkbox"/> Go to question 21 |

**If yes:**

How old were you at first intercourse?  years

How old was your first partner at that time?  years

18. How many sexual partners did you have during your lifetime?

|  |  |  |        |
|--|--|--|--------|
|  |  |  | number |
|--|--|--|--------|

19. Did you have sexual intercourse within the last 12 months?

|       |   |                          |
|-------|---|--------------------------|
| - yes | 1 | <input type="checkbox"/> |
| - no  | 2 | <input type="checkbox"/> |

**If yes:**

How often have you used condoms during the last 12 months?

|                                         |   |                          |
|-----------------------------------------|---|--------------------------|
| At every sexual intercourse             | 1 | <input type="checkbox"/> |
| Frequently but not at every intercourse | 2 | <input type="checkbox"/> |
| Rarely                                  | 3 | <input type="checkbox"/> |
| Only sexual intercourse without condoms | 4 | <input type="checkbox"/> |

20. Is your husband / cohabiter / regular partner circumcised?

|                                          |   |                          |
|------------------------------------------|---|--------------------------|
| Yes                                      | 1 | <input type="checkbox"/> |
| No                                       | 2 | <input type="checkbox"/> |
| No husband / cohabiter / regular partner | 3 | <input type="checkbox"/> |

21. Has a doctor or other health care provider told you that you had genital warts (condyloma)?

|       |   |                          |
|-------|---|--------------------------|
| - yes | 1 | <input type="checkbox"/> |
| - no  | 2 | <input type="checkbox"/> |

**If yes:**

How old were you when you had genital warts for the first time? 

|  |  |
|--|--|
|  |  |
|--|--|

 years

Have you had genital warts in the last 12 months?

|       |   |                          |
|-------|---|--------------------------|
| - yes | 1 | <input type="checkbox"/> |
| - no  | 2 | <input type="checkbox"/> |

22. Have you ever been screened against cervical cancer?

|       |   |                          |
|-------|---|--------------------------|
| - yes | 1 | <input type="checkbox"/> |
| - no  | 2 | <input type="checkbox"/> |

**If yes:**

Has a doctor or other health care provider told you that you had precancerous lesions on the cervix?

|       |   |                          |                   |
|-------|---|--------------------------|-------------------|
| - yes | 1 | <input type="checkbox"/> |                   |
| - no  | 2 | <input type="checkbox"/> | Go to question 23 |

When did you have your last diagnose of precancerous lesions?

|  |
|--|
|  |
|--|

calendar month

|  |  |  |
|--|--|--|
|  |  |  |
|--|--|--|

calendar year

Which treatment did you receive?

|                |   |                          |
|----------------|---|--------------------------|
| - Cryo therapy | 1 | <input type="checkbox"/> |
| - LEEP         | 2 | <input type="checkbox"/> |
| - Don't know   | 3 | <input type="checkbox"/> |

23. Has a doctor or other health care provider told you that you had one of the following sexually transmitted diseases?

|                   |                                           |                                          |               |                                     |
|-------------------|-------------------------------------------|------------------------------------------|---------------|-------------------------------------|
| <b>Chlamydia</b>  | <sub>1</sub> <input type="checkbox"/> Yes | <sub>2</sub> <input type="checkbox"/> No | <b>If yes</b> | Age at first episode _____<br>Years |
| <b>Gonorrhoea</b> | <sub>1</sub> <input type="checkbox"/> Yes | <sub>2</sub> <input type="checkbox"/> No | <b>If yes</b> | Age at first episode _____<br>Years |
| <b>Syphilis</b>   | <sub>1</sub> <input type="checkbox"/> Yes | <sub>2</sub> <input type="checkbox"/> No | <b>If yes</b> | Age at first episode _____<br>Years |

24. Have you ever been tested for HIV?

|       |                                       |
|-------|---------------------------------------|
| - yes | <sub>1</sub> <input type="checkbox"/> |
| - no  | <sub>2</sub> <input type="checkbox"/> |

**If yes:**

**Have you ever tested positive?**

|       |                                       |                          |
|-------|---------------------------------------|--------------------------|
| - yes | <sub>1</sub> <input type="checkbox"/> |                          |
| - no  | <sub>2</sub> <input type="checkbox"/> | <b>Go to question 25</b> |

**If yes:**

**When did you test positive?**

calendar month

calendar year

**When did you have your last CD4 count test?**

*(If more than 6 months ago → refer the woman for a new test)*

calendar month

calendar year

**What was the result of the CD4 count? \_\_\_\_\_ number**

1  
2  
3  
4  
5  
6  
7  
8  
9  
10  
11  
12  
13  
14  
15  
16  
17  
18  
19  
20  
21  
22  
23  
24  
25  
26  
27  
28  
29  
30  
31  
32  
33  
34  
35  
36  
37  
38  
39  
40  
41  
42  
43  
44  
45  
46  
47  
48  
49  
50  
51  
52  
53  
54  
55  
56  
57  
58  
59  
60

**Have you ever been started on ARV treatment?**

|       |   |                          |
|-------|---|--------------------------|
| - yes | 1 | <input type="checkbox"/> |
| - no  | 2 | <input type="checkbox"/> |

**If yes:**

**started when ?**

|                    |                                |                               |               |                                                               |                                                                                                            |
|--------------------|--------------------------------|-------------------------------|---------------|---------------------------------------------------------------|------------------------------------------------------------------------------------------------------------|
| <b>First line</b>  | 1 <input type="checkbox"/> Yes | 2 <input type="checkbox"/> No | <b>If yes</b> | <input type="text"/>   <input type="text"/><br>calendar month | <input type="text"/>   <input type="text"/>   <input type="text"/>   <input type="text"/><br>calendar year |
| <b>Second line</b> | 1 <input type="checkbox"/> Yes | 2 <input type="checkbox"/> No | <b>If yes</b> | <input type="text"/>   <input type="text"/><br>calendar month | <input type="text"/>   <input type="text"/>   <input type="text"/>   <input type="text"/><br>calendar year |
| <b>Third line</b>  | 1 <input type="checkbox"/> Yes | 2 <input type="checkbox"/> No | <b>If yes</b> | <input type="text"/>   <input type="text"/><br>calendar month | <input type="text"/>   <input type="text"/>   <input type="text"/>   <input type="text"/><br>calendar year |

**What is your CTC card number?**

|             |             |
|-------------|-------------|
| _____       | _____       |
| Clinic name | Card number |

**What is your CTC file number?**

\_\_\_\_\_

File number

**If you do not know, can we call you and get the number?**

|       |   |                          |
|-------|---|--------------------------|
| - yes | 1 | <input type="checkbox"/> |
| - no  | 2 | <input type="checkbox"/> |

**TAARIFA KUHUSU SARATANI YA SHINGO YA KIZAZI****(KNOWLEDGE OF CERVICAL CANCER)****25. Sentensi zifuatazo zinahusu saratani ya shingo ya kizazi. Sema kweli au si kweli kwa kila sentensi***(Here are some statements about cervical cancer. I will ask you to answer which are true and which are false)*

|                                                                                                                                                                                                                         |                                |                                   |
|-------------------------------------------------------------------------------------------------------------------------------------------------------------------------------------------------------------------------|--------------------------------|-----------------------------------|
| <b>1. Malaria (mbu) inasababisha saratani ya shingo ya kizazi</b><br><i>(Malaria (mosquito) causes cervical cancer)</i>                                                                                                 | Kweli <input type="checkbox"/> | Si kweli <input type="checkbox"/> |
| <b>2. Kupata maumivu wakati wa kukojoa ni dalili ya saratani ya shingo ya kizazi</b><br><i>(Pain during urination can be a sign of cervical cancer)</i>                                                                 | Kweli <input type="checkbox"/> | Si kweli <input type="checkbox"/> |
| <b>3. Saratani ya shingo ya kizazi ndiyo inayoongoza kwa magonjwa ya kanza za wanawake hapa Tanzania</b><br><i>(Cervical cancer is the most common cancer disease among Tanzanian women)</i>                            | Kweli <input type="checkbox"/> | Si kweli <input type="checkbox"/> |
| <b>4. Unaweza kupata saratani ya shingo ya kizazi kwa kubusiana</b><br><i>(You can get cervical cancer from deep kissing)</i>                                                                                           | Kweli <input type="checkbox"/> | Si kweli <input type="checkbox"/> |
| <b>5. Inawezekana kujikinga na saratani ya shingo ya kizazi</b><br><i>(It is possible to prevent cervical cancer)</i>                                                                                                   | Kweli <input type="checkbox"/> | Si kweli <input type="checkbox"/> |
| <b>6. Kutokwa damu ukeni ni dalili kuu ya ugonjwa wa saratani ya shingo ya kizazi</b><br><i>(Vaginal bleeding is the most common sign of cervical cancer)</i>                                                           | Kweli <input type="checkbox"/> | Si kweli <input type="checkbox"/> |
| <b>7. Jua kali linaweza kusababisha saratani ya shingo ya kizazi</b><br><i>(Too much sun can lead to cervical cancer)</i>                                                                                               | Kweli <input type="checkbox"/> | Si kweli <input type="checkbox"/> |
| <b>8. Maambukizi ya kwenye shingo ya kizazi mara zote hubadilika kuwa saratani</b><br><i>(A cervical infection will always turn into cancer)</i>                                                                        | Kweli <input type="checkbox"/> | Si kweli <input type="checkbox"/> |
| <b>9. Wanawake wenye VVU wako kwenye hatari kubwa ya kupata saratani ya shingo ya kizazi</b><br><i>(HIV-positive women have higher risk of developing cervical cancer)</i>                                              | Kweli <input type="checkbox"/> | Si kweli <input type="checkbox"/> |
| <b>10. Saratani ya shingo ya kizazi mara nyingi hugundulika mapema kutokana na dalili zake</b><br><i>(Cervical cancer is often found at an early stage due to obvious symptoms)</i>                                     | Kweli <input type="checkbox"/> | Si kweli <input type="checkbox"/> |
| <b>11. Unaweza kupata saratani ya shingo ya kizazi kwa kujamiiana bila kinga</b><br><i>(You can get cervical cancer from unprotected sexual intercourse)</i>                                                            | Kweli <input type="checkbox"/> | Si kweli <input type="checkbox"/> |
| <b>12. Kupima afya kunaweza kugundua maambukizi ya kwenye shingo ya kizazi na kuyazuia yasibalike kuwa saratani</b><br><i>(Screening can detect cervical infections so they do not develop into cancer)</i>             | Kweli <input type="checkbox"/> | Si kweli <input type="checkbox"/> |
| <b>13. Saratani ya shingo ya kizazi inaongoza kwa kusababisha vifo vinavyotokana na saratani kwa wanawake hapa Tanzania</b><br><i>(Cervical cancer is the main cause of cancer-related death among Tanzanian women)</i> | Kweli <input type="checkbox"/> | Si kweli <input type="checkbox"/> |
| <b>14. Saratani ya shingo ya kizazi mara nyingi huwapata wanawake wakiwa kwenye miaka ya ishirini.</b><br><i>(Cervical cancer is most common for women in their 20's)</i>                                               | Kweli <input type="checkbox"/> | Si kweli <input type="checkbox"/> |
| <b>15. Kuwashwa ukeni kunaweza kuwa ni dalili ya saratani ya shingo ya kizazi</b><br><i>(Itchiness in the vaginal area can be a sign of cervical cancer)</i>                                                            | Kweli <input type="checkbox"/> | Si kweli <input type="checkbox"/> |
| <b>16. Kirusi kinachoitwa Human papilloma virus ndicho kisababishacho saratani ya shingo ya kizazi</b><br><i>(A virus called "Human papilloma virus" (HPV) causes cervical cancer)</i>                                  | Kweli <input type="checkbox"/> | Si kweli <input type="checkbox"/> |

**UKUBALI WA UJUMBE MFUPI KUPITIA SIMU YA MKONONI**  
(ACCEPTANCE OF MOBILE MESSAGES)

**UTANGULIZI (Introduction):**

*Kwenye utafiti huu wanawake watatakiwa kurudi baada ya miezi 14. Baadhi ya wanawake watatumiwa ujumbe kupitia simu ya mkononi wenye taarifa za afya na kukukumbusha siku ya kurudi kliniki. Nitakuuliza maswali machache kuhusu ujumbe wa kupitia simu ya mkononi*

*(In this study, all women will get a new appointment at the clinic after 14 months. However, some women will also receive health information and reminders of their appointment via sms. Here are some questions about mobile messages.)*

**26. Utajisikiaje ukipata ujumbe mfupi wenye taarifa kuhusu saratani ya shingo ya kizazi na upimaji wake kwenye simu yako au ya familia yako? (Chagua tabasamu sahihi kuonyesha utakavyojisikia)**

*(How do you feel about receiving health information and reminders of your appointment via sms on your or your family's mobile phone? Choose the one smiley that best shows how you feel)*

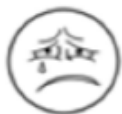

**Siipendi kabisa**  
*I do not like it at all*



**Siipendi**  
*I do not like it*



**Sio sawa**  
*It is not okay*



**Sawa**  
*It is okay*



**Naipenda**  
*I like it*



**Naipenda sana**  
*I like it very much*

1  
2  
3  
4  
5  
6  
7  
8  
9  
10  
11  
12  
13  
14  
15  
16  
17  
18  
19  
20  
21  
22  
23  
24  
25  
26  
27  
28  
29  
30  
31  
32  
33  
34  
35  
36  
37  
38  
39  
40  
41  
42  
43  
44  
45  
46  
47  
48  
49  
50  
51  
52  
53  
54  
55  
56  
57  
58  
59  
60

**27. Utajisikiaje ukipata ujumbe mfupi wenye taarifa kuhusu saratani ya shingo ya kizazi na upimaji wake kwenye simu yako au ya familia yako? (Weka alama ya mstari wima kuonyesha utakavyojisikia).**

*(How do you feel about receiving health information and reminders of your appointment via sms on your or your family's mobile phone? Make one vertical mark on the line similar to how you feel)*



**Thanks a lot for your help**

**If there are any comments to add, please write them below**

---

---

---

---

---



1  
2  
3  
4  
5  
6  
7  
8  
9  
10  
11  
12  
13  
14  
15  
16  
17  
18  
19  
20  
21  
22  
23  
24  
25  
26  
27  
28  
29  
30  
31  
32  
33  
34  
35  
36  
37  
38  
39  
40  
41  
42  
43  
44  
45  
46  
47  
48  
49  
50  
51  
52  
53  
54  
55  
56  
57  
58  
59  
60

\_\_\_\_\_

Baseline Study number

\_\_\_\_\_

Follow-up Study number

For peer review only

# Concept

Comprehensive Prevention of Cervical Cancer in Tanzania

## FOLLOW-UP QUESTIONNAIRE

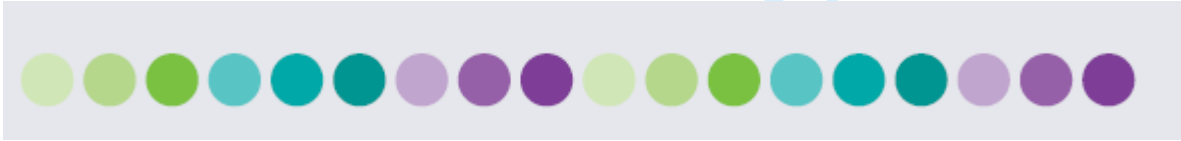

Study site: ORCI KCMC MAWENZI 

Date \_\_\_\_\_

Follow-up Study number \_\_\_\_\_

Baseline Study number \_\_\_\_\_

Health Provider Initials \_\_\_\_\_

Participant initials \_\_\_\_\_

**REPRODUCTIVE HEALTH and SEXUAL HABITS****1. Have you given birth since your last screening visit?**

|       |   |                                             |
|-------|---|---------------------------------------------|
| - yes | 1 | <input type="checkbox"/>                    |
| - no  | 2 | <input type="checkbox"/> → Go to question 2 |

**If yes:**

|                                              |   |                      |
|----------------------------------------------|---|----------------------|
| Total number of pregnancies since last visit | 1 | <input type="text"/> |
| Total number of births since last visit      | 2 | <input type="text"/> |

**2. Did you have a sexual partner since your last screening visit?**

|       |   |                                           |
|-------|---|-------------------------------------------|
| - yes | 1 | <input type="checkbox"/>                  |
| - no  | 2 | <input type="checkbox"/> Go to question 3 |

**If yes:****Have you had a new sexual partner since your last screening visit?**

|       |   |                          |
|-------|---|--------------------------|
| - yes | 1 | <input type="checkbox"/> |
| - no  | 2 | <input type="checkbox"/> |

How many sexual partners did you have since your last screening visit?

|  |  |  |        |
|--|--|--|--------|
|  |  |  | number |
|--|--|--|--------|

How often have you used condoms since your last screening visit?

|                                         |   |                          |
|-----------------------------------------|---|--------------------------|
| At every sexual intercourse             | 1 | <input type="checkbox"/> |
| Frequently but not at every intercourse | 2 | <input type="checkbox"/> |
| Rarely                                  | 3 | <input type="checkbox"/> |
| Only sexual intercourse without condoms | 4 | <input type="checkbox"/> |

3. Is your husband / cohabiter / regular partner circumcised?

|                                          |   |                          |
|------------------------------------------|---|--------------------------|
| Yes                                      | 1 | <input type="checkbox"/> |
| No                                       | 2 | <input type="checkbox"/> |
| No husband / cohabiter / regular partner | 3 | <input type="checkbox"/> |

**Hormonal Family Planning**

4. Have you ever used hormonal family planning methods?

|       |   |                                                  |
|-------|---|--------------------------------------------------|
| - yes | 1 | <input type="checkbox"/>                         |
| - no  | 2 | <input type="checkbox"/> <b>Go to question 5</b> |

**If yes:**

**What type of hormonal contraceptives have you used?**

| Type                                       | No, never                  | Yes                        | If <u>yes</u> , how long have you used it overall? |                                                         |
|--------------------------------------------|----------------------------|----------------------------|----------------------------------------------------|---------------------------------------------------------|
| Birth control pills                        | 2 <input type="checkbox"/> | 1 <input type="checkbox"/> | <input type="text"/> <input type="text"/><br>years | and <input type="text"/> <input type="text"/><br>months |
| Birth control shot (Depo-provera)          | 2 <input type="checkbox"/> | 1 <input type="checkbox"/> | <input type="text"/> <input type="text"/><br>years | and <input type="text"/> <input type="text"/><br>months |
| Birth control implant (Implanon/ Nexoplan) | 2 <input type="checkbox"/> | 1 <input type="checkbox"/> | <input type="text"/> <input type="text"/><br>years | and <input type="text"/> <input type="text"/><br>months |
| Hormonal IUD (Mirena)                      | 2 <input type="checkbox"/> | 1 <input type="checkbox"/> | <input type="text"/> <input type="text"/><br>years | and <input type="text"/> <input type="text"/><br>months |

## HIV

**5. Have you tested positive for HIV since your last screening visit?**

|       |                            |                         |
|-------|----------------------------|-------------------------|
| - yes | 1 <input type="checkbox"/> |                         |
| - no  | 2 <input type="checkbox"/> | <b>Go to question 6</b> |

**If yes:**

**When did you test positive?**

 

calendar month

   

calendar year

**When did you have your last CD4 count test?**

*(If more than 6 months ago → refer the woman for a new test)*

 

calendar month

   

calendar year

**What was the result of the CD4 count? \_\_\_\_\_ number**

**Have you ever been started on ARV treatment?**

|       |                            |
|-------|----------------------------|
| - yes | 1 <input type="checkbox"/> |
| - no  | 2 <input type="checkbox"/> |

**If yes:**

**started when ?**

|                    |                                |                               |               |                                        |                                       |
|--------------------|--------------------------------|-------------------------------|---------------|----------------------------------------|---------------------------------------|
| <b>First line</b>  | 1 <input type="checkbox"/> Yes | 2 <input type="checkbox"/> No | <b>If yes</b> | <input type="text"/><br>calendar month | <input type="text"/><br>calendar year |
| <b>Second line</b> | 1 <input type="checkbox"/> Yes | 2 <input type="checkbox"/> No | <b>If yes</b> | <input type="text"/><br>calendar month | <input type="text"/><br>calendar year |
| <b>Third line</b>  | 1 <input type="checkbox"/> Yes | 2 <input type="checkbox"/> No | <b>If yes</b> | <input type="text"/><br>calendar month | <input type="text"/><br>calendar year |

**What is your CTC card number?**

\_\_\_\_\_   
Clinic name

\_\_\_\_\_   
Card number

**What is your CTC file number?**

\_\_\_\_\_   
File number

**If you do not know, can we call you and get the number?**

|       |                            |
|-------|----------------------------|
| - yes | 1 <input type="checkbox"/> |
| - no  | 2 <input type="checkbox"/> |

**ATTENDANCE TO FOLLOW-UP APPOINTMENT**

**6. Which of following tools were most important for you to remember your appointment today? (choose one answer)**

|                                                              |                            |                         |
|--------------------------------------------------------------|----------------------------|-------------------------|
| I remembered from my appointment card and came to the clinic | 1 <input type="checkbox"/> | <b>Go to question 8</b> |
| I had a sms-reminder and came to the clinic                  | 2 <input type="checkbox"/> | <b>Go to question 8</b> |
| A nurse called me and told me to come to the clinic          | 3 <input type="checkbox"/> | <b>Go to question 7</b> |
| A nurse visited me at home and told me to come to the clinic | 4 <input type="checkbox"/> | <b>Go to question 7</b> |
| A nurse visited and we had the appointment at my home        | 5 <input type="checkbox"/> | <b>Go to question 7</b> |

1  
2  
3  
4  
5  
6  
7  
8  
9  
10  
11  
12  
13  
14  
15  
16  
17  
18  
19  
20  
21  
22  
23  
24  
25  
26  
27  
28  
29  
30  
31  
32  
33  
34  
35  
36

**7. What are the main reasons why you did not come to the clinic before the nurse contacted you?**

|                                                             |                                           |                                          |
|-------------------------------------------------------------|-------------------------------------------|------------------------------------------|
| I could not afford transportation on my own                 | Yes <sub>1</sub> <input type="checkbox"/> | No <sub>2</sub> <input type="checkbox"/> |
| I did not think the appointment was important               | Yes <sub>1</sub> <input type="checkbox"/> | No <sub>2</sub> <input type="checkbox"/> |
| I had forgotten                                             | Yes <sub>1</sub> <input type="checkbox"/> | No <sub>2</sub> <input type="checkbox"/> |
| I was nervous about the result of the screening             | Yes <sub>1</sub> <input type="checkbox"/> | No <sub>2</sub> <input type="checkbox"/> |
| I was nervous about having a gynaecological examination     | Yes <sub>1</sub> <input type="checkbox"/> | No <sub>2</sub> <input type="checkbox"/> |
| House chores prevented me from coming                       | Yes <sub>1</sub> <input type="checkbox"/> | No <sub>2</sub> <input type="checkbox"/> |
| The clinic is too far away from my home                     | Yes <sub>1</sub> <input type="checkbox"/> | No <sub>2</sub> <input type="checkbox"/> |
| Rainy season/ public holidays                               | Yes <sub>1</sub> <input type="checkbox"/> | No <sub>2</sub> <input type="checkbox"/> |
| My family does not know that I go, so I have to go secretly | Yes <sub>1</sub> <input type="checkbox"/> | No <sub>2</sub> <input type="checkbox"/> |
| I had my period                                             | Yes <sub>1</sub> <input type="checkbox"/> | No <sub>2</sub> <input type="checkbox"/> |
| I was pregnant                                              | Yes <sub>1</sub> <input type="checkbox"/> | No <sub>2</sub> <input type="checkbox"/> |
| I had moved                                                 | Yes <sub>1</sub> <input type="checkbox"/> | No <sub>2</sub> <input type="checkbox"/> |
| Other (please write) .....                                  |                                           |                                          |

37  
38  
39  
40  
41  
42  
43  
44  
45  
46  
47  
48  
49  
50  
51  
52  
53  
54  
55  
56  
57  
58  
59  
60

**HEALTH EDUCATION BY MOBILE PHONE**

(ELIMU YA AFIA QUA SIM)

**8. Have you received any text messages (sms) regarding cervical cancer and your screening appointment at the clinic?**

|       |                                       |                                    |
|-------|---------------------------------------|------------------------------------|
| - yes | <sub>1</sub> <input type="checkbox"/> |                                    |
| - no  | <sub>2</sub> <input type="checkbox"/> | <b>(Questionnaire is finished)</b> |

**If yes:**

**How do you like the number of messages that you received?**

|                             |                                       |
|-----------------------------|---------------------------------------|
| Too many messages           | <sub>1</sub> <input type="checkbox"/> |
| Adequate amount of messages | <sub>2</sub> <input type="checkbox"/> |
| Too few messages            | <sub>3</sub> <input type="checkbox"/> |

**How do you feel about of the following statements? (If 'don't know' leave box empty)**

|                                                                                                    |                                           |                                          |
|----------------------------------------------------------------------------------------------------|-------------------------------------------|------------------------------------------|
| The information in the messages was easy to understand                                             | Yes <sup>1</sup> <input type="checkbox"/> | No <sup>2</sup> <input type="checkbox"/> |
| I did <i>not</i> need help from others to read the messages                                        | Yes <sup>1</sup> <input type="checkbox"/> | No <sup>2</sup> <input type="checkbox"/> |
| The information in messages made me uncomfortable                                                  | Yes <sup>1</sup> <input type="checkbox"/> | No <sup>2</sup> <input type="checkbox"/> |
| I know how to read text messages on my phone                                                       | Yes <sup>1</sup> <input type="checkbox"/> | No <sup>2</sup> <input type="checkbox"/> |
| I often send and receive text messages on my phone                                                 | Yes <sup>1</sup> <input type="checkbox"/> | No <sup>2</sup> <input type="checkbox"/> |
| I shared the health education that I got on my phone with friends or family                        | Yes <sup>1</sup> <input type="checkbox"/> | No <sup>2</sup> <input type="checkbox"/> |
| I would like to continue to receive health information by mobile phone                             | Yes <sup>1</sup> <input type="checkbox"/> | No <sup>2</sup> <input type="checkbox"/> |
| My husband or other family members was happy that I received health information on my mobile phone | Yes <sup>1</sup> <input type="checkbox"/> | No <sup>2</sup> <input type="checkbox"/> |
| I would recommend a friend or a family member to receive health education by mobile phone          | Yes <sup>1</sup> <input type="checkbox"/> | No <sup>2</sup> <input type="checkbox"/> |

**How do you feel about receiving health information and reminders of your appointment via sms on your mobile? (Choose the one smiley that best shows how you feel)**

*Utajisikiaje ukipata ujumbe mfupi wenye taarifa kuhusu saratani ya shingo ya kizazi na upimaji wake kwenye simu yako au? (Chagua tabasamu sahihi kuonyesha utakavyojisikia)*

-  *I do not like it at all*
-  *I do not like it*
-  *It is not okay*
-  *It is okay*
-  *I like it*
-  *I like it very much*

Here are some statements about cervical cancer. I will ask you to answer which are true and which are false? (*only for women that have received sms!*)

Sentensi zifuatazo zinahusu saratani ya shingo ya kizazi. Sema kweli au si kweli kwa kila sentensi

|                                                                                                                                                                                                           |                                |                                   |
|-----------------------------------------------------------------------------------------------------------------------------------------------------------------------------------------------------------|--------------------------------|-----------------------------------|
| 1. Malaria (mbu) inasababisha saratani ya shingo ya kizazi<br>(Malaria (mosquito) causes cervical cancer)                                                                                                 | Kweli <input type="checkbox"/> | Si kweli <input type="checkbox"/> |
| 2. Kupata maumivu wakati wa kukojoa ni dalili ya saratani ya shingo ya kizazi<br>(Pain during urination can be a sign of cervical cancer)                                                                 | Kweli <input type="checkbox"/> | Si kweli <input type="checkbox"/> |
| 3. Saratani ya shingo ya kizazi ndiyo inayoongoza kwa magonjwa ya kanza za wanawake hapa Tanzania<br>(Cervical cancer is the most common cancer disease among Tanzanian women)                            | Kweli <input type="checkbox"/> | Si kweli <input type="checkbox"/> |
| 4. Unaweza kupata saratani ya shingo ya kizazi kwa kubusiana<br>(You can get cervical cancer from deep kissing)                                                                                           | Kweli <input type="checkbox"/> | Si kweli <input type="checkbox"/> |
| 5. Inawezekana kujikinga na saratani ya shingo ya kizazi<br>(It is possible to prevent cervical cancer)                                                                                                   | Kweli <input type="checkbox"/> | Si kweli <input type="checkbox"/> |
| 6. Kutokwa damu ukeni ni dalili kuu ya ugonjwa wa saratani ya shingo ya kizazi<br>(Vaginal bleeding is the most common sign of cervical cancer)                                                           | Kweli <input type="checkbox"/> | Si kweli <input type="checkbox"/> |
| 7. Jua kali linaweza kusababisha saratani ya shingo ya kizazi<br>(Too much sun can lead to cervical cancer)                                                                                               | Kweli <input type="checkbox"/> | Si kweli <input type="checkbox"/> |
| 8. Maambukizi ya kwenye shingo ya kizazi mara zote hubadilika kuwa saratani<br>(A cervical infection will always turn into cancer)                                                                        | Kweli <input type="checkbox"/> | Si kweli <input type="checkbox"/> |
| 9. Wanawake wenye VVU wako kwenye hatari kubwa ya kupata saratani ya shingo ya kizazi<br>(HIV-positive women have higher risk of developing cervical cancer)                                              | Kweli <input type="checkbox"/> | Si kweli <input type="checkbox"/> |
| 10. Saratani ya shingo ya kizazi mara nyingi hugundulika mapema kutokana na dalili zake<br>(Cervical cancer is often found at an early stage due to obvious symptoms)                                     | Kweli <input type="checkbox"/> | Si kweli <input type="checkbox"/> |
| 11. Unaweza kupata saratani ya shingo ya kizazi kwa kujamiiana bila kinga<br>(You can get cervical cancer from unprotected sexual intercourse)                                                            | Kweli <input type="checkbox"/> | Si kweli <input type="checkbox"/> |
| 12. Kupima afya kunaweza kugundua maambukizi ya kwenye shingo ya kizazi na kuyazuia yasibalike kuwa saratani<br>(Screening can detect cervical infections so they do not develop into cancer)             | Kweli <input type="checkbox"/> | Si kweli <input type="checkbox"/> |
| 13. Saratani ya shingo ya kizazi inaongoza kwa kusababisha vifo vinavyotokana na saratani kwa wanawake hapa Tanzania<br>(Cervical cancer is the main cause of cancer-related death among Tanzanian women) | Kweli <input type="checkbox"/> | Si kweli <input type="checkbox"/> |
| 14. Saratani ya shingo ya kizazi mara nyingi huwapata wanawake wakiwa kwenye miaka ya ishirini.<br>(Cervical cancer is most common for women in their 20's)                                               | Kweli <input type="checkbox"/> | Si kweli <input type="checkbox"/> |
| 15. Kuwashwa ukeni kunaweza kuwa ni dalili ya saratani ya shingo ya kizazi<br>(Itchiness in the vaginal area can be a sign of cervical cancer)                                                            | Kweli <input type="checkbox"/> | Si kweli <input type="checkbox"/> |
| 16. Kirusi kinachoitwa Human papilloma virus ndicho kisababishacho saratani ya shingo ya kizazi<br>(A virus called "Humanpapiloma virus" (HPV) causes cervical cancer)                                    | Kweli <input type="checkbox"/> | Si kweli <input type="checkbox"/> |



1  
2  
3  
4  
5  
6  
7  
8  
9  
10  
11  
12  
13  
14  
15  
16  
17  
18  
19  
20  
21  
22  
23  
24  
25  
26  
27  
28  
29  
30  
31  
32  
33  
34  
35  
36  
37  
38  
39  
40  
41  
42  
43  
44  
45  
46  
47  
48  
49  
50  
51  
52  
53  
54  
55  
56  
57  
58  
59  
60

**Thanks a lot for your help**

**If there are any comments to add, please write them below**

---

---

---

---

For peer review only

# BMJ Open

## Cohort profile: The comprehensive cervical cancer prevention in Tanzania (CONCEPT) study

|                                 |                                                                                                                                                                                                                                                                                                                                                                                                                                                                                                                                                                                                                                                                                                                                                                                                                                                                                                                                                                                                                                                                                                                                                                    |
|---------------------------------|--------------------------------------------------------------------------------------------------------------------------------------------------------------------------------------------------------------------------------------------------------------------------------------------------------------------------------------------------------------------------------------------------------------------------------------------------------------------------------------------------------------------------------------------------------------------------------------------------------------------------------------------------------------------------------------------------------------------------------------------------------------------------------------------------------------------------------------------------------------------------------------------------------------------------------------------------------------------------------------------------------------------------------------------------------------------------------------------------------------------------------------------------------------------|
| Journal:                        | <i>BMJ Open</i>                                                                                                                                                                                                                                                                                                                                                                                                                                                                                                                                                                                                                                                                                                                                                                                                                                                                                                                                                                                                                                                                                                                                                    |
| Manuscript ID                   | bmjopen-2020-038531.R2                                                                                                                                                                                                                                                                                                                                                                                                                                                                                                                                                                                                                                                                                                                                                                                                                                                                                                                                                                                                                                                                                                                                             |
| Article Type:                   | Cohort profile                                                                                                                                                                                                                                                                                                                                                                                                                                                                                                                                                                                                                                                                                                                                                                                                                                                                                                                                                                                                                                                                                                                                                     |
| Date Submitted by the Author:   | 13-Jul-2020                                                                                                                                                                                                                                                                                                                                                                                                                                                                                                                                                                                                                                                                                                                                                                                                                                                                                                                                                                                                                                                                                                                                                        |
| Complete List of Authors:       | Mchome, Bariki; Kilimanjaro Christian Medical Centre, Department of Obstetrics and Gynaecology<br>Swai, Patricia; Kilimanjaro Christian Medical Centre, Department of Obstetrics and Gynaecology<br>Wu, Chunsen; University of Southern Denmark, Department of Clinical Research; Odense Universitetshospital, Obstetrics and Gynaecology<br>Katanga, Johnson; Ocean Road Cancer Institute, Department for Cancer Prevention Services<br>Kahesa, C; Ocean Road Cancer Institute, Department for Cancer Prevention Services<br>Manongi, Rachel; Kilimanjaro Christian Medical College, Institute of Public Health<br>Mwaiselage, Julius; Ocean Road Cancer Institute, Department for Cancer Prevention Services<br>Kjaer, Susanne; Danish Cancer Society Research Center, Department of Virus, Lifestyle and Genes; Copenhagen University Hospital, Department of Gynaecology<br>Rasch, Vibeke; University of Southern Denmark, Department of Clinical Research; Odense Universitetshospital, Obstetrics and Gynaecology<br>Linde, Ditte ; University of Southern Denmark, Department of Clinical Research; Odense Universitetshospital, Obstetrics and Gynaecology |
| <b>Primary Subject Heading</b>: | Global health                                                                                                                                                                                                                                                                                                                                                                                                                                                                                                                                                                                                                                                                                                                                                                                                                                                                                                                                                                                                                                                                                                                                                      |
| Secondary Subject Heading:      | Oncology, Obstetrics and gynaecology, Public health, HIV/AIDS, Epidemiology                                                                                                                                                                                                                                                                                                                                                                                                                                                                                                                                                                                                                                                                                                                                                                                                                                                                                                                                                                                                                                                                                        |
| Keywords:                       | Gynaecological oncology < GYNAECOLOGY, PREVENTIVE MEDICINE, REPRODUCTIVE MEDICINE, International health services < HEALTH SERVICES ADMINISTRATION & MANAGEMENT, HIV & AIDS < INFECTIOUS DISEASES                                                                                                                                                                                                                                                                                                                                                                                                                                                                                                                                                                                                                                                                                                                                                                                                                                                                                                                                                                   |
|                                 |                                                                                                                                                                                                                                                                                                                                                                                                                                                                                                                                                                                                                                                                                                                                                                                                                                                                                                                                                                                                                                                                                                                                                                    |

SCHOLARONE™  
Manuscripts



I, the Submitting Author has the right to grant and does grant on behalf of all authors of the Work (as defined in the below author licence), an exclusive licence and/or a non-exclusive licence for contributions from authors who are: i) UK Crown employees; ii) where BMJ has agreed a CC-BY licence shall apply, and/or iii) in accordance with the terms applicable for US Federal Government officers or employees acting as part of their official duties; on a worldwide, perpetual, irrevocable, royalty-free basis to BMJ Publishing Group Ltd ("BMJ") its licensees and where the relevant Journal is co-owned by BMJ to the co-owners of the Journal, to publish the Work in this journal and any other BMJ products and to exploit all rights, as set out in our [licence](#).

The Submitting Author accepts and understands that any supply made under these terms is made by BMJ to the Submitting Author unless you are acting as an employee on behalf of your employer or a postgraduate student of an affiliated institution which is paying any applicable article publishing charge ("APC") for Open Access articles. Where the Submitting Author wishes to make the Work available on an Open Access basis (and intends to pay the relevant APC), the terms of reuse of such Open Access shall be governed by a Creative Commons licence – details of these licences and which [Creative Commons](#) licence will apply to this Work are set out in our licence referred to above.

Other than as permitted in any relevant BMJ Author's Self Archiving Policies, I confirm this Work has not been accepted for publication elsewhere, is not being considered for publication elsewhere and does not duplicate material already published. I confirm all authors consent to publication of this Work and authorise the granting of this licence.

# Cohort profile: The comprehensive cervical cancer prevention in Tanzania (CONCEPT) study

## Authors

Bariki Mchome<sup>a</sup>, Patricia Swai<sup>a</sup>, ChunsenWu<sup>b,c</sup>, Johnson Katanga<sup>d</sup>, Crispin Kahesa<sup>d</sup>, Rachel Manongi<sup>e</sup>, Julius Mwaiselage<sup>d</sup>, Susanne K. Kjaer<sup>f,g</sup>, Vibeke Rasch<sup>b,c</sup>, Ditte S. Linde<sup>b,c,h\*</sup>

<sup>a</sup>Department of Obstetrics and Gynaecology, Kilimanjaro Christian Medical Centre, Moshi, Tanzania.

Email: barikimchome@gmail.com; patriciaswai@yahoo.com

<sup>b</sup>Department of Clinical Research, University of Southern Denmark, Odense, Denmark. Email:

dsondergaard@health.sdu.dk; vrasch@health.sdu.dk

<sup>c</sup>Department of Obstetrics and Gynaecology, Odense University Hospital, Odense, Denmark. Email:

Chunsen.Wu@rsyd.dk

<sup>d</sup>Department for Cancer Prevention Services, Ocean Road Cancer Institute, Dar es Salaam, Tanzania. Email:

johnsonkatanga2013@gmail.com; crispinkahesa@yahoo.co.uk; jmwaiselage@yahoo.com

<sup>e</sup>Institute of Public Health, Kilimanjaro Christian Medical University College, Moshi, Tanzania. Email:

naeraheli@gmail.com

<sup>f</sup>Department of Virus, Lifestyle and Genes, Danish Cancer Society Research Center, Copenhagen, Denmark.

Email: susanne@cancer.dk

<sup>g</sup>Department of Gynaecology, Rigshospitalet University Hospital, Copenhagen, Denmark

<sup>h</sup>OPEN, Odense Patient Data Explorative Network, Odense University Hospital, Odense, Denmark

\*Corresponding author: Ditte S. Linde, Department of Clinical Research, University of Southern Denmark,

Denmark. Email: dsondergaard@health.sdu.dk

Word count: 3325

1  
2  
3  
4  
5  
6  
7  
8  
9  
10  
11  
12  
13  
14  
15  
16  
17  
18  
19  
20  
21  
22  
23  
24  
25  
26  
27  
28  
29  
30  
31  
32  
33  
34  
35  
36  
37  
38  
39  
40  
41  
42  
43  
44  
45  
46  
47  
48  
49  
50  
51  
52  
53  
54  
55  
56  
57  
58  
59  
60

## 26 **Abstract**

### 27 **Purpose**

28 Cervical cancer is a major cause of death among women in Eastern Africa, and the distribution of HPV  
29 according to HIV-status is inadequately characterised in this region. In order to guide future cervical cancer  
30 preventive strategies that involve HPV-testing, the Comprehensive Cervical Cancer Project in Tanzania  
31 (CONCEPT) study was established in 2015. The CONCEPT cohort aims to investigate the natural history of  
32 HPV and determine acquisition and persistence patterns of high-risk (HR) HPV among HIV-positive and -  
33 negative women. Further, the influence of lifestyle and sexual/reproductive factors will be investigated. The  
34 main objective of this article is to describe how the CONCEPT cohort was established.

### 36 **Participants**

37 Women aged 25-60 years were enrolled from cervical cancer screening clinics in Dar-es-Salaam and Moshi,  
38 Tanzania. Data were collected at baseline, at 14 months (1<sup>st</sup> follow-up), and at 28 months (2<sup>nd</sup> follow-up).  
39 Biological samples included two cervical swabs for *careHPV* DNA-testing, cytology, Hybrid Capture 2,  
40 genotyping, and blood samples for HIV. Visual inspection with acetic acid was performed, and socio-  
41 demographic, lifestyle, and sexual/reproductive characteristics were collected through a standardised  
42 questionnaire.

### 44 **Findings to date**

45 4043 women were included in the cohort from August 2015–May 2017. At baseline, 696 (17.1%) women  
46 were HR HPV-positive and among these 31.6% were HIV-positive; 139 women (3.4%) had high grade  
47 squamous intraepithelial lesions. 3074 women (81%) attended the 1<sup>st</sup> follow-up. The majority attended after  
48 receiving a phone call reminder (35%) or from home via self-samples (41%). At 1<sup>st</sup> follow-up, 438 (14.4%)  
49 were HR HPV-positive and 30.4% of these were HIV-positive.

## 51 **Future plans**

52 A second follow-up is underway (17 December 2018–October 2020). We plan to integrate our data with a  
53 previous cross-sectional HPV study from Tanzania to increase the power of our findings. Researchers  
54 interested in collaborating are welcomed, either by extracting data or jointly requesting further investigation  
55 from the cohort.

## 58 **Strengths and limitations of this study**

- 59 • This is a large-scale longitudinal cervical cancer study conducted in an HIV endemic population that  
60 aims to address a major cause of disease among East-African women, which so far has not received  
61 much focus within global health research.
- 62 • Women are followed over a long duration of time and with a large amount of data being collected by  
63 use of questionnaires and lab tests.
- 64 • It was difficult to get women to return for follow-up screenings. However, carefully designed tracing  
65 plans and dedicated home-visiting staff entailed that we managed to attain an 81% participation rate  
66 at 1<sup>st</sup> follow-up.
- 67 • Detailed HIV documentation was challenging to obtain, which has limited the power in analyses  
68 involving HIV immunologic markers and treatment.

## 72 **Introduction**

73 Cervical cancer is a major cause of cancer-related mortality and morbidity globally. The highest prevalence  
74 is found among women aged 45-60 years<sup>1</sup>, and the burden of disease is disproportionately distributed among

1  
2  
3  
4 75 low- and middle-income countries (LMIC) and high-income countries (HIC) – LMICs account for 80% of  
5  
6 76 cervical cancer cases worldwide. The global age-standardised incidence rate for cervical cancer is 14 per  
7  
8 77 100,000 women<sup>2</sup> while the incidence rate of cervical cancer is 42.7 per 100,000 women in East Africa<sup>3</sup> and  
9  
10 78 54 per 100,000 women in Tanzania, specifically<sup>4</sup>. Major contributing factors to the high burden of disease in  
11  
12 79 resource-limited settings includes low awareness of the disease and how to prevent it and unavailability of  
13  
14 80 organised screening programmes. The standard screening test in resource-limited settings is visual inspection  
15  
16 81 with acetic acid (VIA) as this can be performed by mid-level providers and allows for immediate treatment.  
17  
18 82 However, the results of VIA is a subjective interpretation resulting in variable performances, and the utility  
19  
20 83 is questionable in resource-limited settings when the number of screening rounds per women's lifetime is  
21  
22 84 low<sup>5</sup>.

23  
24  
25 85  
26  
27 86 HPV is the most common sexually transmitted infection worldwide, and there is a 60-70% life-time risk of  
28  
29 87 acquiring an HPV infection among sexually active women<sup>6</sup>. Eighty to 90% of HPV infections clear  
30  
31 88 spontaneously, however 10-20% become persistent and can develop into pre-cancerous lesions and cervical  
32  
33 89 cancer over time. There are different factors associated with HPV persistence, the two most significant ones  
34  
35 90 are the type of HPV involved and immunodeficiency, hence HIV-positive women have increased risk of  
36  
37 91 acquiring HPV<sup>7</sup> and for the infection to become persistent<sup>8,9</sup>. HPV16 and 18 are the two most important  
38  
39 92 types as these are associated with approximately 70% of all invasive cervical cancers worldwide<sup>6</sup>. Globally,  
40  
41 93 the five most common types are HPV16, 18, 52, 31, and 58<sup>10,11</sup>. However, cross-sectional studies from  
42  
43 94 Africa and systematic reviews on the global HPV burden indicate that the type-specific prevalence of HPV  
44  
45 95 differs in Africa compared to other regions<sup>2,12,13</sup>, specifically HPV 52, 58, 31, and 35 are more common in  
46  
47 96 African countries compared to other parts of the world<sup>14-16</sup>. Tanzanian data from the HPV information centre  
48  
49 97 has found the most prevalent HR HPV types among Tanzanian women with high grade squamous  
50  
51 98 intraepithelial lesions (HSIL) to be HPV 16 (30.2%), HPV 52 (21.9%), and HPV 18 (16.7%) while the most  
52  
53 99 prevalent HPV types among women with cervical cancer to be HPV 16 (47.7%), HPV 18 (18.2%) and HPV  
54  
55 100 45 (11.4%)<sup>17</sup>. Further, sexual, reproductive, and lifestyle factors influence HPV acquisition and persistence,  
56  
57 101 including smoking, high parity, number of sexual partners, long-term use of oral contraceptives, and co-  
58  
59  
60

1  
2  
3  
4 102 infections with other sexually transmitted agents<sup>18 19</sup>. However to date, there are no adequately powered  
5  
6 103 longitudinal HPV studies among middle-aged women in East Africa that explore the association of HIV,  
7  
8 104 immunological factors, reproductive, and lifestyle factors on HR HPV acquisition and persistence.  
9  
10  
11 105

12  
13 106 To our knowledge, only two HPV cohort studies and one large HPV cross-sectional study have been  
14  
15 107 conducted in Africa, which explore the dynamics of HPV, HIV, and cervical cancer, namely (I) the HPV in  
16  
17 108 Africa Research Partnership (HARP) HPV Study in Burkina Faso and Tanzania<sup>20</sup>; (II) the African  
18  
19 109 Collaborative Center for Microbiome and Genomics Research (ACCME) study in Nigeria<sup>21</sup>; and (III) the  
20  
21 110 Prevention of Cervical Cancer in Tanzania (PROTECT) study<sup>22</sup>. Other studies are nested in HPV vaccine  
22  
23 111 trials<sup>23-25</sup>. These studies have provided some insight into the distribution of HPV among different African  
24  
25 112 populations, however, they were either cross-sectional or conducted among adolescents' with inadequately  
26  
27 113 powered HIV-positive women and with a relatively short duration of follow-up.  
28  
29  
30 114

31  
32 115 The Comprehensive Cervical Cancer Prevention in Tanzania (CONCEPT) study was launched in 2015 with  
33  
34 116 an overall aim of improving prevention of cervical cancer in Tanzania (online supplementary appendix 1).  
35  
36 117 The CONCEPT study is an international collaborative study between Ocean Road Cancer Institute (ORCI),  
37  
38 118 Kilimanjaro Christian Medical Centre (KCMC), University of Southern Denmark, and the Danish Cancer  
39  
40 119 Society Research Center. The CONCEPT study has several specific objectives; (I) To investigate the natural  
41  
42 120 history of HPV and its associated factors; (II) To determine the feasibility and acceptability of HPV self-  
43  
44 121 sampling<sup>26</sup> and the test performance of *care*HPV compared to (HC2) and VIA<sup>11</sup>; and (III) how to ensure  
45  
46 122 follow-up of HPV-positive women, and elucidate what motivates or prevents these women from attending to  
47  
48 123 follow-up visits<sup>27 28 29</sup>. Introduction of HPV DNA testing in LMIC is challenging due to logistical problems  
49  
50  
51 124 inherent in these settings, however, HPV-based primary screening is a key method in future screening  
52  
53 125 programmes across the world<sup>26</sup>, and for it to be effectively established in resource-limited settings, local  
54  
55 126 specific evidence is warranted. The aim of this article is to describe how this cohort was established and  
56  
57 127 followed up, the profile of the cohort, and provide some characteristics of the cohort at enrolment and at the  
58  
59  
60



1  
2  
3  
4  
5  
6  
7  
8  
9  
10  
11  
12  
13  
14  
15  
16  
17  
18  
19  
20  
21  
22  
23  
24  
25  
26  
27  
28  
29  
30  
31  
32  
33  
34  
35  
36  
37  
38  
39  
40  
41  
42  
43  
44  
45  
46  
47  
48  
49  
50  
51  
52  
53  
54  
55  
56  
57  
58  
59  
60

128 1<sup>st</sup> follow-up. The specific objectives of the CONCEPT study have been and will be published in separate  
129 papers<sup>11 28 30-33</sup>.

130

## 131 Cohort description

### 132 Study design and study population

133 This study was conducted in Tanzania, which is a low-income country located in Eastern African with a  
134 population of 56 million people<sup>10</sup>. Women were enrolled from three existing cervical cancer screening clinics  
135 located in urban and semi-rural areas; (1) ORCI in Dar-es-Salaam as well as (2) KCMC and (3) Mawenzi  
136 regional referral hospital in the Kilimanjaro region. ORCI is a national cancer hospital that provides clinical  
137 care and treatment for all the cancer patients in the country. Additionally, they conduct cervical cancer  
138 screening three times a week for the general population. KCMC is a Northern zonal tertiary facility which  
139 provides cervical screening three times a week for general population, and Mawenzi Hospital is a regional  
140 hospital which provides cervical cancer screening two times a week. In Dar-es-Salaam, women from Ilala,  
141 Temeke, and Mwananyamala district were included while in the Kilimanjaro region, women originating  
142 from the urban and rural district of Moshi – including Hai and Rombo – were included. Originally, the study  
143 was designed as a double-site study (KCMC/ORCI), however, due to a slower-than-anticipated recruitment  
144 rate, a third study site (Mawenzi) was added six months into the enrolment period. Women were eligible for  
145 inclusion if they were 25-60 years and attended a patient-initiated routine cervical cancer screening at one of  
146 the study sites. Women were excluded if they were pregnant, on their menstrual period, had a history of  
147 premalignant lesions of the cervix within the last 12 months, had previously been diagnosed with cervical  
148 cancer or had undergone abdominal hysterectomy. Women on their menstrual period were encouraged to  
149 return once their menstrual period was over. Following a detailed explanation of the study, all participants  
150 provided written informed consent. Fingerprints were used for illiterate participants. The CONCEPT study  
151 was approved by the Ethical Committee of the Tanzanian National Institute of Medical Research  
152 (NIMR/HQ/R.8a/Vol.IX/1955), and is reported according to the Strengthening the Reporting of

1  
2  
3  
4  
5  
6  
7  
8  
9  
10  
11  
12  
13  
14  
15  
16  
17  
18  
19  
20  
21  
22  
23  
24  
25  
26  
27  
28  
29  
30  
31  
32  
33  
34  
35  
36  
37  
38  
39  
40  
41  
42  
43  
44  
45  
46  
47  
48  
49  
50  
51  
52  
53  
54  
55  
56  
57  
58  
59  
60

Observational studies in Epidemiology (STROBE) statement (online supplementary appendix 2). HIV-positive women were oversampled from Care and Treatment Clinics (CTC) at the study sites from where they were referred to the screening clinics. The total number of women and HIV-positives required for the study was found through a power calculation based on McNemar's test comparing two diagnostic tests (S1: standard test (VIA) versus S2: new test (careHPV) with cervical cytology as the reference test and the threshold being HSIL+ (HSIL, carcinoma in situ and carcinoma). The power calculation was based on the research group's previous study in Tanzania<sup>22</sup>. It was estimated that 180-200 women would have precancerous lesions at baseline (~true positives) and assuming a significance level of 5%, 80% power, and a sensitivity of VIA of 30%, it would be possible to detect a significant difference if the sensitivity of the new test would be at least 44%. It was anticipated that *careHPV* testing would have a higher sensitivity than VIA.

Data were collected during the enrolment visit, at 14 months (1<sup>st</sup> follow-up), and at 28 months (2<sup>nd</sup> follow-up, ongoing). As there is no a predefined optimal duration of time to investigate the natural history of HPV, the length of follow-up was based on a number of factors, including the recommended duration of time between cervical cancer screenings for HIV-positive women (12 months)<sup>34</sup>, available resources, risk for developing cervical lesions, and limiting the workload at the screening clinics by minimising overlaps between enrolment and follow-up visits. Healthcare providers working at the screening clinics enrolled participants and collected data following protocols developed specifically for the project. At inclusion, all participants were given a 14-months follow-up appointment written on an appointment card. If the women did not attend their follow-up visit within one month of their appointment, an active follow-up procedure was initiated. Firstly, non-attendees were contacted by phone and encouraged to attend (tracing method I). If the woman did not show up within two weeks of the phone call, the women had a home-visit by an outreach nurse who encouraged her to attend (tracing method II). If the woman still did not attend and consented to it, an outreach nurse visited her again and conducted the follow-up visit at home (tracing method III). Transportation costs were compensated for those women who were reminded to come. Women, who participated in the first follow-up were appointed a second follow-up visit 28 months after initial recruitment. If the woman did not attend the 2<sup>nd</sup> follow-up, tracing method I and III were re-initiated.

1  
2  
3  
4 180  
5  
6  
7 181  
8  
9  
10 182  
11  
12 183  
13  
14 184  
15  
16 185  
17  
18 186  
19  
20 187  
21  
22 188  
23  
24 189  
25  
26 190  
27  
28 191  
29  
30 192  
31  
32 193  
33  
34 194  
35  
36 195  
37  
38 196  
39  
40 197  
41  
42 198  
43  
44 199  
45  
46 200  
47  
48 201  
49  
50 202  
51  
52 203  
53  
54 204  
55  
56 205  
57  
58 206  
59  
60

## Assessment of exposure

At inclusion, socio-demographic, lifestyle, reproductive, and sexual characteristics were collected during a personal interview using a modified version of a standardised questionnaire adopted from a previous study conducted in Tanzania<sup>35</sup> (supplementary online appendix 3). The questionnaire was hardcopy, developed in English while the interview was conducted in Kiswahili with direct translation. A Kiswahili version of the questionnaire was available to guide the interviewers. A detailed contact information form was filled at enrolment and updated at follow-up. Participants were screened by trained healthcare providers according to the standard national cervical cancer screening prevention programme in Tanzania<sup>36</sup>. This entails a cost-free gynaecological examination with VIA, HIV-testing and HIV-counselling. Venous blood from the index finger was tested by use of a quick HIV-1/2 test ([www.alere.com](http://www.alere.com)), and a supplementary quick HIV-1/2 test (Abbott Laboratories) was performed as confirmatory for positive results. Discordant results were further confirmed using Unigold (Trinity Biotech). Women who screened VIA-positive or were suspected of manifest cancer were managed on-site based on the National Cervical Cancer Service Delivery Guidelines. This included treatment with cryotherapy or loop electrosurgical excision procedure (LEEP) for VIA-positives, and punch biopsy and referral for treatment at the oncology clinic at ORCI for cancer suspicions<sup>36</sup>. Further, weight and height were measured and registered on a hard-copy registration sheet together with the HIV- and VIA-result (Table 1).

206 **Table 1. Overview of data collected in the CONCEPT cohort**

|                                                                         | Measurements                                                                                                                                                                                                           | Instrument                                                                                                                                                                          | Storage and analysis                                                                                                                                                                                                                                                                                                                                                                                                                                                                                                                                                                               |
|-------------------------------------------------------------------------|------------------------------------------------------------------------------------------------------------------------------------------------------------------------------------------------------------------------|-------------------------------------------------------------------------------------------------------------------------------------------------------------------------------------|----------------------------------------------------------------------------------------------------------------------------------------------------------------------------------------------------------------------------------------------------------------------------------------------------------------------------------------------------------------------------------------------------------------------------------------------------------------------------------------------------------------------------------------------------------------------------------------------------|
| <b>Baseline</b><br>17 Aug 2015 – 6 Jul 2017                             | <b>Biological samples</b><br>1 provider-collected cervical swab for: <ul style="list-style-type: none"> <li>• <i>careHPV</i>® DNA-testing</li> </ul>                                                                   | <ul style="list-style-type: none"> <li>• Aryes spatula</li> <li>• Kept in <i>careHPV</i> collection medium</li> </ul>                                                               | <ul style="list-style-type: none"> <li>• Samples stored on-site in laboratories at room temperature</li> <li>• When 90 samples were available they were processed on-site on a <i>careHPV</i> machine</li> <li>• Results registered on <i>careHPV</i> sheet and stored on-site</li> </ul>                                                                                                                                                                                                                                                                                                          |
|                                                                         | 1 provider-collected cervical swab for: <ul style="list-style-type: none"> <li>• Cytology</li> <li>• HC2</li> <li>• Genotyping</li> </ul>                                                                              | <ul style="list-style-type: none"> <li>• ThinPrep® Pap Test plastic spatula</li> <li>• Kept in PreServCyt solution</li> </ul>                                                       | <ul style="list-style-type: none"> <li>• Samples stored on-site in laboratories at room temperature until enrolment had finished</li> <li>• Then the samples were sent to the Pathology Department at Lillebaelt Hospital, Denmark and processed on the ThinPrep5000 Autoloader Instrument, Hologic® for cytology</li> <li>• Remaining material of the samples were sent to the Section for Experimental Virology, Tubingen University, Germany and underwent HC2 DNA testing and genotyping using LiPaExtra</li> <li>• Cytology and HC2 and genotype results were sent to OUH, Denmark</li> </ul> |
|                                                                         | Venous blood from index finger for: <ul style="list-style-type: none"> <li>• HIV-test</li> </ul>                                                                                                                       | <ul style="list-style-type: none"> <li>• Quick HIV-1/2 test</li> </ul>                                                                                                              | <ul style="list-style-type: none"> <li>• Immediate results registered on registration form and stored on-site</li> </ul>                                                                                                                                                                                                                                                                                                                                                                                                                                                                           |
|                                                                         | <b>Visual assessment</b> <ul style="list-style-type: none"> <li>• VIA</li> </ul>                                                                                                                                       | <ul style="list-style-type: none"> <li>• Acetic acid applied to cervix and abnormal tissue temporarily appears white</li> </ul>                                                     | <ul style="list-style-type: none"> <li>• Immediate results registered on registration form and stored on-site</li> </ul>                                                                                                                                                                                                                                                                                                                                                                                                                                                                           |
|                                                                         | <b>Anthropometric measures</b> <ul style="list-style-type: none"> <li>• Weight</li> <li>• Height</li> </ul>                                                                                                            | <ul style="list-style-type: none"> <li>• Scale and altitude meter</li> </ul>                                                                                                        | <ul style="list-style-type: none"> <li>• Immediate results registered on registration form and stored on-site</li> </ul>                                                                                                                                                                                                                                                                                                                                                                                                                                                                           |
|                                                                         | <b>Personal interview</b> <ul style="list-style-type: none"> <li>• Socio-demographic factors</li> <li>• HIV treatment and CD4 count</li> <li>• Lifestyle factors</li> <li>• Sexual and reproductive factors</li> </ul> | <ul style="list-style-type: none"> <li>• Structured questionnaire</li> </ul>                                                                                                        | <ul style="list-style-type: none"> <li>• Interviewed by nurse and stored on-site</li> <li>• CD4 count abstracted from CTC cards and further traced in patient files</li> </ul>                                                                                                                                                                                                                                                                                                                                                                                                                     |
| <b>14-months follow-up (1<sup>st</sup>)</b><br>17 Oct 2016 – 6 Oct 2018 | <b>Biological samples</b><br>1 provider-collected cervical swab <i>or</i> self-collected swab for: <ul style="list-style-type: none"> <li>• HC2</li> <li>• Genotyping</li> </ul>                                       | <ul style="list-style-type: none"> <li>• ThinPrep® Pap Test plastic spatula (provider-based)</li> <li>• Evalyn® brush (self-swab)</li> <li>• Kept in PreServCyt solution</li> </ul> | <ul style="list-style-type: none"> <li>• Self-swabs were conducted in the women’s home (cf. tracing method III) and transferred to the study sites where they were stored with ThinPrep samples similarly to baseline until 1<sup>st</sup> follow-up had finished</li> <li>• Then the samples were sent to the Section for Experimental Virology, Tubingen University, Germany and underwent HC2 DNA testing and genotyping using LiPaExtra</li> <li>• HC2 and genotype results were sent to OUH, Denmark</li> </ul>                                                                               |
|                                                                         | Venous blood from index finger for: <ul style="list-style-type: none"> <li>• HIV-test (if negative at baseline)</li> </ul>                                                                                             | <ul style="list-style-type: none"> <li>• Quick HIV-1/2 test</li> </ul>                                                                                                              | <ul style="list-style-type: none"> <li>• Immediate results registered on registration form and stored on-site</li> <li>• HIV-test was not conducted on women who participated from home (cf. tracing method III)</li> </ul>                                                                                                                                                                                                                                                                                                                                                                        |

|                                                                                   |                                                                                                                                           |                                                                                                                       |                                                                                                                                                        |
|-----------------------------------------------------------------------------------|-------------------------------------------------------------------------------------------------------------------------------------------|-----------------------------------------------------------------------------------------------------------------------|--------------------------------------------------------------------------------------------------------------------------------------------------------|
|                                                                                   | <b>Visual assessment</b><br>• VIA                                                                                                         | • Acetic acid applied to cervix and abnormal tissue temporarily appears white                                         | • Immediate results registered on registration form and stored on-site<br>• Not conducted on women who participated from home (cf. tracing method III) |
|                                                                                   | <b>Personal interview</b><br>• HIV treatment and CD4 count<br>• Sexual factors                                                            | • Structured questionnaire                                                                                            | • Interviewed by nurse at clinic or at home and stored on-site<br>• CD4 count abstracted from CTC cards and further traced in patient files            |
| 28-months follow-up (2 <sup>nd</sup> )<br>(17 December 2017 – primo October 2020) | <b>Biological samples</b><br>1 provider-collected cervical swab <i>or</i> self-swab only for HPV-positive women:<br>• HC2<br>• Genotyping | • ThinPrep® Pap Test plastic spatula (provider-based)<br>• Evalyn® brush (self-swab)<br>• Kept in PreServCyt solution | • <i>Same procedure as in 1<sup>st</sup> follow-up</i>                                                                                                 |
|                                                                                   | Venous blood from index finger for:<br>• HIV-test (if negative at 1 <sup>st</sup> follow-up)                                              | • Quick HIV-1/2 test                                                                                                  | • <i>Same procedure as in 1<sup>st</sup> follow-up</i>                                                                                                 |
|                                                                                   | <b>Visual assessment</b><br>• VIA                                                                                                         | • Acetic acid applied to cervix and abnormal tissue temporarily appears white                                         | • <i>Same procedure as in 1<sup>st</sup> follow-up</i>                                                                                                 |
|                                                                                   | <b>Personal interview</b><br>• HIV treatment and CD4 count<br>• Sexual factors                                                            | • Structured questionnaire                                                                                            | • <i>Same procedure as in 1<sup>st</sup> follow-up</i>                                                                                                 |

Prior to the routine VIA examination, cervical swabs were taken using (I) an Aryes spatula for *careHPV* test (www.qiagen.com), and another specimen was taken using (II) a ThinPrep® Pap Test Plastic Spatula for liquid-based cytology, HPV DNA testing and genotyping by use of HC2 and LiPaExtra (Innogenetics, Gent, Belgium). The cervical samples for *careHPV* analysis were kept in a *careHPV* collection medium and stored at room temperature (max 25°C) in laboratories at ORCI or KCMC. Once 90 samples had been collected, they were analysed for HR HPV using a *careHPV* machine. A test was considered positive if one or more of the following 14 HR HPV types were detected: HPV16, 18, 31, 33, 35, 39, 45, 51, 52, 56, 58, 59, 66, 68. The results were registered on a *careHPV* results sheet (Table 1).

The samples for HC2 testing, genotyping, and cytology were kept in a PreServCyt solution (Hologic, Inc. 250 Campus Drive Marlborough, MA 01752 USA) and stored at room temperature in laboratories at ORCI and KCMC. Once enrolment had finished, the PreServCyt vials were sent to the Department of Pathology at

1  
2  
3  
4 220 Lillebaelt Hospital, Vejle, Denmark and processed at the ThinPrep5000 Autoloader Instrument, Hologic®  
5  
6 221 according to manufactures instruction and stained with ThinPrep Stain®. The slides were scanned by the  
7  
8 222 Thin Prep Imaging System® with selection of 22 Fields of view which was reviewed by cytotechnologist in  
9  
10 223 review scopes. The specimens were evaluated for adequacy and for abnormal cells. If abnormal cells were  
11  
12 224 detected, the slides were consulted with a gynae-pathologist who made the final diagnosis. The specimens  
13  
14 225 were diagnosed according to the Bethesda Nomenclature for System for Cervical Cytology 2014<sup>37</sup> into  
15  
16 226 following categories: Negative for intra epithelial lesion (NILM), Atypical squamous cell of undetermined  
17  
18 227 significance (ASCUS), Atypical squamous cell in which High grade squamous intraepithelial lesion cannot  
19  
20 228 be excluded (ASCH), Low grade squamous intraepithelial Lesion (LSIL), HSIL, Atypical glandular cell  
21  
22 229 (AGC), Adenocarcinoma in situ (AIS), and Adenocarcinoma. The remaining material of the PreServCyt  
23  
24 230 vials were sent to the Section for Experimental Virology, Tubingen University, Germany for HPV DNA  
25  
26 231 testing and genotyping. HPV DNA testing was done using HC2 DNA test (www.qiagen.com) with a HR  
27  
28 232 cocktail probe. A test was considered positive if one or more of the following 14 HR HPV types were found:  
29  
30 233 HPV 16, 18, 31, 33, 35, 39, 45, 51, 52, 56, 58, 59, 66, 68. A threshold of 1.0pg HPVDNA/ml, which  
31  
32 234 corresponds to 1.0 relative light unit coefficient, was used, as recommended by United States Food and Drug  
33  
34 235 Authority. HPV-positive samples were genotyped using LiPaExtra, which can detect 28 HPV types, 18 HR  
35  
36 236 risk types (HPV 16, 18, 26, 31, 33, 35, 39, 45, 51, 52, 53, 56, 58, 59, 66, 68, 73, 82) and 10 low risk types  
37  
38 237 (HPV 6, 11, 40, 43, 44, 54, 69, 70, 71, 74)<sup>38</sup>.  
39  
40  
41  
42  
43  
44

## 45 239 **Outcome measures**

46  
47 240 Women who attended their follow-up appointment at the screening clinics were HIV-tested (if negative at  
48  
49 241 baseline), had a cervical swab collected with a ThinPrep® Pap Test Plastic Spatula – for HPV DNA testing  
50  
51 242 by use of HC2 and genotyping by use of LiPaExtra – and underwent VIA (Table 1). Further, sexual and  
52  
53 243 reproductive characteristics were updated by use of a structured questionnaire (online supplementary  
54  
55 244 appendix 4). Women who did not attend their follow-up appointment at the clinic but consented to having a  
56  
57 245 home-visit appointment (cf. tracing method III) responded to the questionnaire and had cervical specimens  
58  
59  
60

1  
2  
3  
4 246 collected by use of an Evalyn self-sampling/self-swab device ([www.roversmedicaldevices.com](http://www.roversmedicaldevices.com)). The  
5  
6 247 samples were transferred to laboratories at ORCI and KCMC where they were kept in a PreServCyt solution  
7  
8 248 and stored at room temperature.  
9

10  
11 249

## 12 13 250 **Data management**

14  
15  
16 251 Questionnaires, registrations forms, contact forms, and *careHPV* result sheets were stored in different  
17  
18 252 cabinets in locked offices at KCMC and ORCI, after which they were double entered into EpiData by data  
19  
20 253 clerks. Together with lab results these data were sent to the Research Unit for Gynaecology& Obstetrics,  
21  
22 254 Odense University Hospital (OUH), Odense, Denmark where they were merged and constructed into a  
23  
24 255 baseline database. Data with invalid IDs or no data registered were excluded upon creation of the database.  
25  
26 256 Similarly to baseline, follow-up data were sent to OUH after which it was merged with the baseline database.  
27  
28 257 Follow-up IDs that could not match a baseline ID were excluded.  
29

30  
31 258

## 32 33 259 **Patient and public involvement**

34  
35  
36 260 Study participants were not involved in the design or recruitment of the study. In order to provide increase  
37  
38 261 public awareness, government and religious leaders were informed about the project, the latter through  
39  
40 262 mosques and churches. When the study finishes, the results and their potential implication to the public will  
41  
42 263 be communicated through meetings with health authorities, policy briefings, and announcements in the  
43  
44 264 mainstream media.  
45

46 265  
47

## 48 49 266 **Findings to date**

### 50 51 52 267 **Baseline findings**

53  
54  
55 268 A total of 4080 women were enrolled into the CONCEPT study. After inclusion, 37 study participants were  
56  
57 269 excluded leaving the total cohort to consist of 4043 women (fig 1). The baseline distribution of the socio-  
58  
59 270 demographic is presented in Table 2. A total of 718 women (17.8%) were HIV-positive and the majority of  
60

these were 35-39 years old (22.9%) while the majority of HIV-negative women were 40-44 years old (19.2%). Among the HIV-positives, 49.7% were married (n=356) whilst 73.6% of HIV-negatives were married (n=2434). Most of both HIV-positive (70.4%; n=504) and HIV-negative women (64.1%;n=2127) had completed primary school. More HIV-negative women (87.0%; n=2879) reported to have had sex within the last 12 months compared to HIV-positive women (72.7%; n=520), while more HIV-positives (26.2%) than HIV-negatives (9.8%) reported to have had used condoms at every intercourse. In relation to number of lifetime partners, 71.9% of HIV-positives reported having more than one lifetime partner whilst the corresponding number for HIV-negative women was 61.0%. The CD4 count for HIV-positive women were as follows: 8.6% (n=62) reported having a CD4 count  $\leq$ 199; 30.5% (n=219) had a CD4 ranging from 200-499; and 48.9% (n=347) had a CD4 count  $\geq$ 500. Further, 12.5% (n=90) of the HIV-positives did not report the CD4 count.

**Table 2: Selected socio-demographic, lifestyle, sexual and reproductive characteristics of the cohort at baseline and 1<sup>st</sup> follow-up stratified according to HIV-status**

|                        | COHORT PROFILE AT BASELINE |      |                             |      |                            |      | COHORT PROFILE AT 1 <sup>ST</sup> FOLLOW-UP |      |                              |      |                               |      |
|------------------------|----------------------------|------|-----------------------------|------|----------------------------|------|---------------------------------------------|------|------------------------------|------|-------------------------------|------|
|                        | Total (n=4043)             |      | HIV-positive (n=718; 17.8%) |      | HIV-negative (n=3325, 82%) |      | Total (n=3074)                              |      | HIV-positive* (n=552; 18.0%) |      | HIV-negative* (n=2522; 82.0%) |      |
|                        | N                          | %    | N                           | %    | N                          | %    | N                                           | %    | N                            | %    | N                             | %    |
| <b>Age</b>             |                            |      |                             |      |                            |      |                                             |      |                              |      |                               |      |
| 25-29                  | 527                        | 13.0 | 43                          | 6.0  | 484                        | 14.6 | 344                                         | 11.2 | 26                           | 4.7  | 318                           | 12.6 |
| 30-34                  | 599                        | 14.8 | 78                          | 10.9 | 521                        | 15.7 | 432                                         | 14.1 | 61                           | 11.1 | 371                           | 14.7 |
| 35-39                  | 744                        | 18.4 | 164                         | 22.9 | 580                        | 17.5 | 547                                         | 17.8 | 121                          | 21.9 | 426                           | 16.9 |
| 40-44                  | 787                        | 19.5 | 149                         | 20.8 | 638                        | 19.2 | 634                                         | 20.6 | 115                          | 20.8 | 519                           | 20.6 |
| 45-49                  | 667                        | 16.5 | 138                         | 19.2 | 529                        | 15.9 | 522                                         | 17.0 | 112                          | 20.3 | 410                           | 16.7 |
| 50-60                  | 716                        | 17.7 | 145                         | 20.2 | 571                        | 17.2 | 595                                         | 19.4 | 117                          | 21.2 | 478                           | 18.9 |
| Missing                | 3                          | 0.1  | 1                           | 0.14 | 2                          | 0.06 | -                                           | -    | -                            | -    | -                             | -    |
| <b>Marital status</b>  |                            |      |                             |      |                            |      |                                             |      |                              |      |                               |      |
| Married                | 2790                       | 69.0 | 356                         | 49.7 | 2434                       | 73.6 | 2159                                        | 70.2 | 288                          | 52.2 | 1871                          | 74.2 |
| Cohabiting             | 58                         | 1.4  | 14                          | 2.0  | 44                         | 1.3  | 44                                          | 1.4  | 11                           | 2.0  | 33                            | 1.3  |
| Single                 | 487                        | 12.0 | 110                         | 15.4 | 377                        | 11.4 | 335                                         | 10.9 | 76                           | 13.8 | 259                           | 10.3 |
| Divorced/widow         | 687                        | 17.0 | 236                         | 33.0 | 451                        | 13.6 | 527                                         | 17.1 | 176                          | 31.9 | 351                           | 13.9 |
| Missing                | 21                         | 0.5  | 2                           | 0.28 | 19                         | 0.57 | 9                                           | 0.3  | 1                            | 0.2  | 8                             | 0.3  |
| <b>BMI</b>             |                            |      |                             |      |                            |      |                                             |      |                              |      |                               |      |
| Underweight            | 96                         | 2.4  | 27                          | 3.9  | 69                         | 2.1  | 73                                          | 2.4  | 21                           | 3.8  | 52                            | 2.1  |
| Normal                 | 1149                       | 28.4 | 269                         | 38.5 | 880                        | 27.3 | 839                                         | 27.3 | 199                          | 36.1 | 640                           | 25.4 |
| Overweight             | 2190                       | 54.2 | 334                         | 47.8 | 1856                       | 57.6 | 1695                                        | 55.1 | 259                          | 46.9 | 1436                          | 56.9 |
| Obese                  | 486                        | 12.0 | 69                          | 9.9  | 417                        | 12.9 | 406                                         | 13.2 | 59                           | 10.7 | 347                           | 13.8 |
| Missing                | 122                        | 3.0  | 19                          | 2.15 | 103                        | 3.1  | 61                                          | 2.0  | 14                           | 2.5  | 47                            | 1.9  |
| <b>Education level</b> |                            |      |                             |      |                            |      |                                             |      |                              |      |                               |      |
| No formal education    | 126                        | 3.1  | 32                          | 4.5  | 94                         | 2.8  | 89                                          | 2.9  | 23                           | 4.2  | 66                            | 2.6  |
| Primary                | 2631                       | 65.1 | 504                         | 70.4 | 2127                       | 64.1 | 2027                                        | 65.9 | 381                          | 69.0 | 2027                          | 65.3 |



|                                         |      |      |     |      |      |      |      |      |     |      |      |      |
|-----------------------------------------|------|------|-----|------|------|------|------|------|-----|------|------|------|
| Secondary                               | 882  | 21.8 | 146 | 20.4 | 736  | 22.2 | 672  | 21.9 | 123 | 22.3 | 672  | 21.8 |
| College                                 | 396  | 9.8  | 34  | 4.7  | 362  | 10.9 | 280  | 9.1  | 23  | 4.2  | 280  | 10.2 |
| Missing                                 | 8    | 0.2  | 2   | 0.28 | 6    | 0.18 | 6    | 0.2  | 2   | 0.4  | 6    | 0.7  |
| <b>Religion</b>                         |      |      |     |      |      |      |      |      |     |      |      |      |
| Christian                               | 2708 | 67.0 | 505 | 70.6 | 2203 | 66.8 | 2064 | 67.1 | 391 | 70.8 | 1673 | 66.3 |
| Muslim                                  | 1289 | 31.9 | 206 | 28.8 | 1083 | 32.8 | 978  | 31.8 | 155 | 28.1 | 823  | 32.6 |
| Other                                   | 16   | 0.4  | 4   | 0.6  | 12   | 0.4  | 13   | 0.4  | 4   | 0.7  | 9    | 0.4  |
| Missing                                 | 30   | 0.7  | 3   | 0.42 | 27   | 0.81 | 19   | 0.6  | 2   | 0.7  | 17   | 0.6  |
| <b>No of living children</b>            |      |      |     |      |      |      |      |      |     |      |      |      |
| 0                                       | 35   | 0.9  | 5   | 0.7  | 30   | 0.9  | 22   | 0.7  | 4   | 0.7  | 18   | 0.7  |
| 1-2                                     | 1506 | 37.2 | 295 | 41.8 | 1211 | 37.5 | 1112 | 36.2 | 219 | 39.7 | 893  | 35.4 |
| 3                                       | 901  | 22.3 | 180 | 25.5 | 721  | 22.3 | 729  | 23.7 | 141 | 25.5 | 588  | 23.2 |
| 4-6                                     | 1135 | 28.1 | 183 | 25.9 | 952  | 29.5 | 900  | 29.3 | 150 | 27.2 | 750  | 29.7 |
| >7                                      | 139  | 3.4  | 19  | 2.7  | 120  | 3.7  | 99   | 3.2  | 12  | 2.2  | 87   | 3.5  |
| Never been pregnant                     | 221  | 5.5  | 24  | 3.4  | 197  | 6.1  | 144  | 4.7  | 16  | 2.9  | 128  | 5.1  |
| Missing                                 | 106  | 2.6  | 12  | 1.67 | 94   | 2.83 | 68   | 2.2  | 10  | 1.8  | 58   | 2.3  |
| <b>Years living with partner</b>        |      |      |     |      |      |      |      |      |     |      |      |      |
| 0-1                                     | 166  | 4.1  | 21  | 3.0  | 145  | 4.4  | 102  | 3.3  | 18  | 3.3  | 84   | 3.3  |
| 2-4                                     | 517  | 12.8 | 112 | 15.9 | 405  | 12.4 | 355  | 11.6 | 74  | 13.4 | 281  | 11.4 |
| 5-9                                     | 723  | 17.9 | 143 | 20.3 | 580  | 17.8 | 515  | 16.8 | 106 | 19.2 | 409  | 16.2 |
| 10-14                                   | 648  | 16.0 | 125 | 17.7 | 523  | 16.0 | 502  | 16.3 | 97  | 17.6 | 405  | 16.1 |
| 15-19                                   | 546  | 13.5 | 104 | 14.8 | 442  | 13.6 | 443  | 14.4 | 85  | 15.4 | 358  | 14.2 |
| >20                                     | 1203 | 29.8 | 162 | 23.0 | 1041 | 31.9 | 993  | 32.2 | 137 | 24.8 | 856  | 33.9 |
| Single with no regular partner          | 163  | 4.0  | 38  | 5.4  | 125  | 3.8  | 118  | 3.8  | 27  | 4.9  | 91   | 3.6  |
| Missing                                 | 77   | 1.9  | 13  | 1.81 | 64   | 1.92 | 46   | 1.5  | 8   | 1.5  | 38   | 1.5  |
| <b>Sex in last 1 year</b>               |      |      |     |      |      |      |      |      |     |      |      |      |
| Yes                                     | 3399 | 84.1 | 520 | 72.7 | 2879 | 87.0 | 2583 | 84.0 | 404 | 73.2 | 2179 | 86.4 |
| No                                      | 610  | 15.1 | 195 | 27.3 | 415  | 12.5 | 478  | 15.6 | 146 | 26.5 | 332  | 13.2 |
| Never had sex                           | 14   | 0.3  | 0   | -    | 14   | 0.4  | 5    | 0.2  | 0   | 0.0  | 5    | 0.2  |
| Missing                                 | 20   | 0.5  | 3   | 0.42 | 17   | 0.51 | 8    | 0.3  | 2   | 0.4  | 6    | 0.2  |
| <b>Condom use within last 12 months</b> |      |      |     |      |      |      |      |      |     |      |      |      |
| No sex within last 12 months            | 610  | 15.1 | 195 | 27.3 | 415  | 12.6 | 478  | 15.6 | 146 | 26.5 | 332  | 13.2 |
| At every intercourse                    | 509  | 12.6 | 187 | 26.2 | 322  | 9.8  | 381  | 12.4 | 139 | 25.2 | 242  | 9.6  |
| Rarely                                  | 204  | 5.0  | 29  | 4.1  | 175  | 5.3  | 146  | 4.8  | 25  | 4.5  | 121  | 4.8  |
| No condom use                           | 2678 | 66.2 | 303 | 42.4 | 2375 | 71.9 | 2052 | 66.8 | 239 | 43.3 | 1813 | 71.9 |
| Never had sex                           | 14   | 0.3  | 0   | -    | 14   | 0.4  | 5    | 0.2  | 0   | 0.0  | 5    | 0.2  |
| Missing                                 | 28   | 0.7  | 4   | 0.56 | 24   | 0.72 | 12   | 0.4  | 3   | 0.5  | 9    | 0.4  |
| <b>Number of lifetime partners</b>      |      |      |     |      |      |      |      |      |     |      |      |      |
| 1                                       | 1476 | 36.5 | 197 | 28.1 | 1279 | 39.0 | 1129 | 36.7 | 158 | 28.6 | 971  | 38.5 |
| 2                                       | 1053 | 26.0 | 194 | 27.7 | 859  | 26.2 | 819  | 26.6 | 155 | 28.1 | 664  | 26.3 |
| 3                                       | 709  | 17.5 | 147 | 21.0 | 562  | 17.1 | 516  | 16.8 | 101 | 18.2 | 415  | 16.5 |
| 4                                       | 284  | 7.0  | 60  | 8.6  | 224  | 6.8  | 221  | 7.2  | 46  | 8.3  | 175  | 6.8  |
| 5-8                                     | 329  | 8.1  | 65  | 9.3  | 264  | 8.1  | 255  | 8.3  | 49  | 8.9  | 206  | 8.2  |
| >9                                      | 113  | 2.8  | 38  | 5.4  | 75   | 2.3  | 89   | 2.9  | 33  | 6.0  | 56   | 2.2  |
| Never had sex                           | 14   | 0.3  | 0   | -    | 14   | 0.4  | 5    | 0.2  | 0   | 0.0  | 5    | 0.2  |
| Missing                                 | 65   | 1.6  | 17  | 2.4  | 48   | 1.4  | 40   | 1.3  | 10  | 1.8  | 30   | 1.2  |

\*According to HIV-status at baseline

287 Among the 4043 participants, the cervical sample was insufficient for HPV analysis for 396 women (9.8%)

288 at baseline, leaving 3667 women eligible for analysis of HPV-positivity. Further, 27 women (0.5%) did not

1  
2  
3  
4 289 have a sample for cervical cytology, leaving 4016 women available for cytological analysis of cervical  
5  
6 290 lesions. All 4043 women were either tested for HIV or had previously tested HIV-positive. At baseline,  
7  
8 291 696/4043 women (17.2%) tested HR HPV-positive by HC2. The cytology showed that overall 3.4%  
9  
10 292 (n=139/4043) had HSIL+ whilst 8.1% (n=329/4043) of women had LSIL. A total 3416 women had both  
11  
12 293 HPV- and cytology results. Among this subgroup of women, 18.9% were HPV-positive (n=644/3416), and  
13  
14 294 the four most common HR HPV types were HPV 52 (3.8%), HPV 16 (3.6%), HPV 58 (2.5%) and HPV 18  
15  
16 (2.4%). Among HIV-positive women, 33.7% were HR HPV positive while the corresponding figure among  
17 295  
18 HIV-negative women was 15.6%. Among women with high grade lesions (HSIL+), 32.5% had HPV 16,  
19 296  
20 19.3% had HPV 58, 17.5% had HPV 31, 16.7% had HPV 18, and 16.7% had HPV 52. A full description of  
21 297  
22 the HPV distributions according to HIV status and cytology results are published elsewhere<sup>33</sup>.  
23 298  
24

## 25 299 26 27 **1st follow-up findings**

28 300  
29  
30 301 A total of 3805 women (94%) were eligible for 1<sup>st</sup> follow-up – 238 women (6%) were ineligible due to  
31  
32 302 becoming pregnant, having moved, having had a hysterectomy or having become sick or died (fig 1). Of the  
33  
34 303 3805 women, 3074 women (81%) attended the first follow-up visit approximately 14<sup>th</sup> months after  
35  
36 304 enrolment. However, among the attendees only 500 (16%) attended within in 30 days of their scheduled  
37  
38 305 appointment date and without being traced for follow-up. A total of 1088 (35%) attended the clinic after a  
39  
40 306 phone call reminder (tracing method I), 62 women (2%) attended the clinic after a nurse home-visit (tracing  
41  
42 307 method II), whilst 1253 women (41%) were followed up at home and had specimens collected using self-  
43  
44 308 sampling device (tracing method III). A total of 731 women (19%) were lost to follow-up (fig 1).  
45  
46

47 309  
48  
49 310 *(Fig 1: Flow chart of enrolment and follow-up of CONCEPT cohort)*  
50  
51

52 311  
53  
54 312 The women who participated in the 1<sup>st</sup> follow-up were very similar to those who did not attend when looking  
55  
56 313 at socio-demographic factors (table 2). However, overall fewer women were HR HPV-positive at follow-up  
57  
58  
59  
60

1  
2  
3  
4 314 compared to baseline (14.8% vs. 17.2%), and fewer HIV-positive women were HR HPV-positive at follow-  
5  
6 315 up compared to baseline (24.1% vs. 31.6%) (table 3).  
7  
8  
9 316

10  
11 317 **Table 3. HR HPV, HIV, and cytology results at baseline and 1<sup>st</sup> follow-up**

| Baseline      |      |      |             | First follow up |      |             |
|---------------|------|------|-------------|-----------------|------|-------------|
| Total(N=4043) |      |      |             | Total(N=3074)   |      |             |
| HPV           | n    | %    | (95% CI)    | n               | %    | (95% CI)    |
| Positive      | 696  | 17.2 | (0.16-0.18) | 438             | 14.3 | (0.13-0.16) |
| Negative      | 2951 | 73   | (0.72-0.74) | 2595            | 84.4 | (0.83-0.86) |
| Missing       | 396  | 9.8  | (0.09-0.1)  | 41              | 1.3  | (0.01-0.02) |
| HIV           |      |      |             |                 |      |             |
| Positive      | 718  | 17.8 | (0.17-0.19) | 552             | 18   | (0.17-0.2)  |
| Negative      | 3325 | 82.2 | (0.81-0.83) | 2522            | 82   | (0.80-0.83) |
| Cytology      |      |      |             |                 |      |             |
| HSIL          | 139  | 3.4  | (0.03-0.04) |                 |      |             |
| LSIL          | 329  | 8.1  | (0.07-0.09) |                 |      |             |
| Negative      | 3548 | 87.8 | (0.87-0.89) |                 |      |             |
| Missing       | 27   | 0.7  | (0.00-0.01) |                 |      |             |

37 318

## 38 39 319 **Strengths and Limitations**

40  
41  
42  
43 320 This is a large-scale longitudinal cervical cancer study conducted in an HIV endemic population that aims to  
44  
45 321 address a major cause of disease among East-African women, which so far has not received much focus  
46  
47 322 within global health research. Women are followed over a long duration of time and with a large amount of  
48  
49 323 data being collected by use of questionnaires and lab tests. Given the nature of our study a significant  
50  
51 324 attrition rate was expected. However, with the carefully designed tracing plans and dedicated home-visiting  
52  
53 325 staff we managed to attain an 81% participation rate at 1<sup>st</sup> follow-up. As women were enrolled during a  
54  
55 326 patient-initiated screening at screening clinics, detailed HIV documentation was challenging to obtain as  
56  
57 327 CTC cards were poorly documented or had not been brought to the screening. Despite the nurses calling  
58  
59  
60

1  
2  
3  
4 328 these women after enrolment to retrieve the information, it was not provided by many HIV-positive  
5  
6 329 participants. This has led to a certain amount of missing values for a few variables and have limited our  
7  
8 330 ability and power in analyses involving HIV immunologic markers and treatment. The HPV distribution  
9  
10 331 found in this study population in comparison to data from the source populations shows that the distribution  
11  
12 332 is somewhat comparable though it also differs to a high extent on some accounts. We found that among  
13  
14 333 women with HSIL+, our study population had a higher prevalence of HPV 16 (32.5% versus 30.2%) and  
15  
16 334 HPV 58 (19.3% versus 6.3%), a lower prevalence of HPV 52 (16.7% versus 21.9%) while the prevalence of  
17  
18 335 HPV 18 was the same (16.7%)<sup>17</sup>. However, the data on the source population is based on one study  
19  
20 336 conducted on ORCI in Dar es Salaam in 2014<sup>10</sup>, hence, the difference in the HPV distribution does not  
21  
22 337 necessarily suggest that our study population is not generalisable to the source population but rather that it  
23  
24 338 builds a stronger basis for understanding the true HPV distribution in Tanzania.  
25  
26  
27  
28 339  
29  
30

## 31 340 **Future plans**

32  
33  
34 341 A second follow-up is underway (17 December 2018 – primo October 2020). Based on our large-scale data  
35  
36 342 of both HPV infection in general and type specific characterised by the women's HIV-status, we plan to  
37  
38 343 integrate this data with a previous cross-sectional HPV study (PROTECT Study) conducted in this  
39  
40 344 population as this can increase power in our findings. As we have already established a large cohort of  
41  
42 345 participants, we foresee a potential to further characterise the HPV burden and establish risk factors over a  
43  
44 346 longer course of time. Specifically, we wish to compare the clinical performance of three potential cervical  
45  
46 347 cancer screening strategies in Tanzania, namely (I) HC2 testing at varying cut-points of viral load as  
47  
48 348 measured by the RLU value; (II) HC2 testing with VIA triage; and (III) HC2 testing with triage using  
49  
50 349 HPV16/18 genotyping. Further, we also foresee the possibility of linking our evidence with other groups in  
51  
52 350 this population including males, adolescents, and pregnant women. This may provide additional information  
53  
54 351 on the similarities of epidemiological burden among these group and delineate differences in the correlations  
55  
56 352 of HPV and HPV-related disease across these different groups.  
57  
58  
59  
60

1  
2  
3  
4 353

## 5 6 7 354 **Collaboration**

8  
9  
10 355 Researchers interested in collaboration in this discipline especially in East and Central Africa are welcomed.

11  
12 356 This may be in extracting data from the project, jointly requesting further investigation from the cohort.

13  
14 357

## 15 16 17 358 **Financial disclosure**

18  
19  
20 359 The work was supported by the Danish International Development Agency (Danida; 14-P02-Tan/A26775).

21  
22 360 The recipient of the grant was the primary investigator of the CONCEPT study (JM). The funders had no  
23  
24 361 role in study design, data collection and analysis, decision to publish, or preparation of the manuscript.

25  
26 362

## 27 28 29 363 **Acknowledgements**

30  
31  
32 364 We would like to thank Danida for supporting this study and thank all partners involved in the CONCEPT  
33  
34 365 study: Screening nurses, outreach nurses, laboratory personnel, and all the women who are part of the  
35  
36 366 CONCEPT study.

37  
38 367

## 39 40 41 42 368 **Contributors**

43  
44  
45 369 JM, RM, VR, and SKK designed the CONCEPT study. JM, RM, VR, SKK, JK, PS, CK, BM, and DSL were  
46  
47 370 involved in collecting data for the study. CW, SKK, VR, BM, and DSL, were involved in data analysis and  
48  
49 371 interpretation. CW, BM, DSL contributed to the conception of this article, and CW, BM, DSL, PS, JK, CK,  
50  
51 372 VR, JM, SKK, and RM were involved in the manuscript writing and revision. All authors read and approved  
52  
53 373 the final manuscript.

54  
55  
56 374

57

58

59

60

## Data sharing statement

Data collected for the CONCEPT cohort study are available upon request. Individual participant data will be identified. Additional available data include the CONCEPT eligibility and informed consent form, the CONCEPT contact information form, the protocol for how to deliver HPV-positive results to participants, the protocol for how to trace non-attendants. Data will be made available upon request by contacting the first or last author of this study by email at [barikimchome@gmail.com](mailto:barikimchome@gmail.com)/[dsondergaard@health.sdu.dk](mailto:dsondergaard@health.sdu.dk), who will then seek approval by the primary investigator in the CONCEPT project, Julius D. Mwaïselage.

## Competing interests

There are no competing interests for any author.

## Supplementary material

|                          |                                                 |
|--------------------------|-------------------------------------------------|
| Supplementary appendix 1 | Original protocol for CONCEPT study             |
| Supplementary appendix 2 | STROBE checklist                                |
| Supplementary appendix 3 | CONCEPT baseline questionnaire                  |
| Supplementary appendix 4 | CONCEPT 1 <sup>st</sup> follow-up questionnaire |

## Abbreviations

|       |                                                                                               |
|-------|-----------------------------------------------------------------------------------------------|
| ACCME | African Collaborative Center for Microbiome and Genomics Research                             |
| AGC   | Atypical glandular cell                                                                       |
| AIS   | Adenocarcinoma in situ                                                                        |
| ASCUS | Atypical squamous cell of undetermined significance                                           |
| ASCH  | Atypical squamous cell in which High grade squamous intraepithelial lesion cannot be excluded |

|    |     |         |                                                      |
|----|-----|---------|------------------------------------------------------|
| 1  |     |         |                                                      |
| 2  |     |         |                                                      |
| 3  |     |         |                                                      |
| 4  | 398 | CTC     | Care and treatment clinic                            |
| 5  |     |         |                                                      |
| 6  | 399 | CONCEPT | Comprehensive Cervical Cancer Prevention in Tanzania |
| 7  |     |         |                                                      |
| 8  |     |         |                                                      |
| 9  | 400 | Danida  | Danish International Development Agency              |
| 10 |     |         |                                                      |
| 11 | 401 | HARP    | HPV in Africa Research Partnership                   |
| 12 |     |         |                                                      |
| 13 | 402 | HC2     | Hybrid Capture 2                                     |
| 14 |     |         |                                                      |
| 15 |     |         |                                                      |
| 16 | 403 | HIC     | High-income countries                                |
| 17 |     |         |                                                      |
| 18 | 404 | HIV     | Human immuno-deficiency virus                        |
| 19 |     |         |                                                      |
| 20 | 405 | HPV     | Human papilloma virus                                |
| 21 |     |         |                                                      |
| 22 |     |         |                                                      |
| 23 | 406 | HSIL    | High grade squamous intraepithelial lesion           |
| 24 |     |         |                                                      |
| 25 | 407 | KCMC    | Kilimanjaro Christian Medical Centre                 |
| 26 |     |         |                                                      |
| 27 | 408 | LEEP    | Loop electrosurgical procedure                       |
| 28 |     |         |                                                      |
| 29 |     |         |                                                      |
| 30 | 409 | LMIC    | Low- and middle-income countries                     |
| 31 |     |         |                                                      |
| 32 | 410 | LSIL    | Low grade squamous intraepithelial lesion            |
| 33 |     |         |                                                      |
| 34 | 411 | NILM    | Negative for intra epithelial lesion                 |
| 35 |     |         |                                                      |
| 36 | 412 | PROTECT | Prevention of Cervical Cancer in Tanzania            |
| 37 |     |         |                                                      |
| 38 |     |         |                                                      |
| 39 | 413 | ORCI    | Ocean Road Cancer Institute                          |
| 40 |     |         |                                                      |
| 41 | 414 |         |                                                      |
| 42 |     |         |                                                      |
| 43 |     |         |                                                      |

## 44 415 **Figure legends**

45  
46  
47 416 Figure 1 Flow chart of enrolment and follow-up of CONCEPT cohort

48  
49 417

## 50 51 418 **References**

- 52  
53  
54  
55 419 1. Organization WH. Improving data for decision-making: a toolkit for cervical cancer prevention and control  
56 420 programmes. 2018. <http://apps.who.int/iris>.  
57 421 2. Serrano B, Brotos M, Bosch FX, et al. Epidemiology and burden of HPV-related disease. *Best Pract Res Clin Obstet*  
58 422 *Gynaecol* 2018;47:14-26. doi: 10.1016/j.bpobgyn.2017.08.006 [published Online First: 2017/10/19]

59  
60

3. Torre LA, Islami F, Siegel RL, et al. Global Cancer in Women: Burden and Trends. *Cancer epidemiology, biomarkers & prevention : a publication of the American Association for Cancer Research, cosponsored by the American Society of Preventive Oncology* 2017;26(4):444-57. doi: 10.1158/1055-9965.epi-16-0858 [published Online First: 2017/02/23]
4. Bruni LB-RL AG, Serrano B. Human Papillomavirus and Related Diseases in Tanzania. Summary Report. *ICO Information Centre on HPV and Cancer (HPV Information Centre)* 2016;15
5. Fokom-Domgue J, Combescurie C, Fokom-Defo V, et al. Performance of alternative strategies for primary cervical cancer screening in sub-Saharan Africa: systematic review and meta-analysis of diagnostic test accuracy studies. *BMJ (Clinical research ed)* 2015;351:h3084. doi: 10.1136/bmj.h3084 [published Online First: 2015/07/05]
6. Bruni L, Diaz M, Castellsague X, et al. Cervical human papillomavirus prevalence in 5 continents: meta-analysis of 1 million women with normal cytological findings. *The Journal of infectious diseases* 2010;202(12):1789-99. doi: 10.1086/657321 [published Online First: 2010/11/12]
7. Nowak RG, Gravitt PE, Morrison CS, et al. Increases in human papillomavirus detection during early HIV infection among women in Zimbabwe. *J Infect Dis* 2011;203(8):1182-91. doi: 10.1093/infdis/jiq172 [published Online First: 2011/04/01]
8. Dames DN, Blackman E, Butler R, et al. High-risk cervical human papillomavirus infections among human immunodeficiency virus-positive women in the Bahamas. *PloS one* 2014;9(1):e85429. doi: 10.1371/journal.pone.0085429 [published Online First: 2014/01/28]
9. Looker KJ, Ronn MM, Brock PM, et al. Evidence of synergistic relationships between HIV and Human Papillomavirus (HPV): systematic reviews and meta-analyses of longitudinal studies of HPV acquisition and clearance by HIV status, and of HIV acquisition by HPV status. *Journal of the International AIDS Society* 2018;21(6):e25110. doi: 10.1002/jia2.25110 [published Online First: 2018/06/07]
10. Dartell MA, Rasch V, Iftner T, et al. Performance of visual inspection with acetic acid and human papillomavirus testing for detection of high-grade cervical lesions in HIV positive and HIV negative Tanzanian women. *International journal of cancer* 2014;135(4):896-904. doi: 10.1002/ijc.28712 [published Online First: 2014/01/07]
11. Linde DS, Korsholm M, Katanga J, et al. One-way SMS and healthcare outcomes in Africa: Systematic review of randomised trials with meta-analysis. *PloS one* 2019;14(6):e0217485. doi: 10.1371/journal.pone.0217485 [published Online First: 2019/06/07]
12. Akarolo-Anthony SN, Famooto AO, Dareng EO, et al. Age-specific prevalence of human papilloma virus infection among Nigerian women. *BMC public health* 2014;14:656. doi: 10.1186/1471-2458-14-656 [published Online First: 2014/06/29]
13. Guan P, Howell-Jones R, Li N, et al. Human papillomavirus types in 115,789 HPV-positive women: a meta-analysis from cervical infection to cancer. *International journal of cancer* 2012;131(10):2349-59. doi: 10.1002/ijc.27485 [published Online First: 2012/02/11]
14. Edna Omar V, Orvalho A, Nalia I, et al. Human papillomavirus prevalence and genotype distribution among young women and men in Maputo city, Mozambique. *BMJ open* 2017;7(7):e015653. doi: 10.1136/bmjopen-2016-015653 [published Online First: 2017/07/19]
15. Husain RS, Ramakrishnan V. Global Variation of Human Papillomavirus Genotypes and Selected Genes Involved in Cervical Malignancies. *Annals of global health* 2015;81(5):675-83. doi: 10.1016/j.aogh.2015.08.026 [published Online First: 2016/04/03]
16. Ogembo RK, Gona PN, Seymour AJ, et al. Prevalence of human papillomavirus genotypes among African women with normal cervical cytology and neoplasia: a systematic review and meta-analysis. *PloS one* 2015;10(4):e0122488. doi: 10.1371/journal.pone.0122488 [published Online First: 2015/04/16]
17. Bruni L AG, Serrano B, Mena M, Gómez D, Muñoz J, Bosch FX, de Sanjosé S. ICO/IARC. Information Centre on HPV and Cancer (HPV Information Centre). Human Papillomavirus and Related Diseases in Tanzania. Summary Report 17 June 2019
18. Organization WH. Human papillomavirus (HPV) and cervical cancer. 2019. [https://www.who.int/en/news-room/fact-sheets/detail/human-papillomavirus-\(hpv\)-and-cervical-cancer](https://www.who.int/en/news-room/fact-sheets/detail/human-papillomavirus-(hpv)-and-cervical-cancer).
19. Bosch FX, Munoz N. The viral etiology of cervical cancer. *Virus research* 2002;89(2):183-90. [published Online First: 2002/11/26]
20. Kelly HA, Ngou J, Chikandiwa A, et al. Associations of Human Papillomavirus (HPV) genotypes with high-grade cervical neoplasia (CIN2+) in a cohort of women living with HIV in Burkina Faso and South Africa. *PloS one* 2017;12(3):e0174117. doi: 10.1371/journal.pone.0174117 [published Online First: 2017/03/24]



- 1  
2  
3  
4 478 21. Adebamowo SN, Dareng EO, Famooto AO, et al. Cohort Profile: African Collaborative Center for Microbiome and  
5 479 Genomics Research's (ACCME's) Human Papillomavirus (HPV) and Cervical Cancer Study. *International journal*  
6 480 *of epidemiology* 2017;46(6):1745-45j. doi: 10.1093/ije/dyx050 [published Online First: 2017/04/19]  
7 481 22. Dartell M, Rasch V, Kahesa C, et al. Human papillomavirus prevalence and type distribution in 3603 HIV-positive  
8 482 and HIV-negative women in the general population of Tanzania: the PROTECT study. *Sexually transmitted*  
9 483 *diseases* 2012;39(3):201-8. doi: 10.1097/OLQ.0b013e31823b50ad [published Online First: 2012/02/18]  
10 484 23. Watson-Jones D, Baisley K, Brown J, et al. High prevalence and incidence of human papillomavirus in a cohort of  
11 485 healthy young African female subjects. *Sexually transmitted infections* 2013;89(5):358-65. doi:  
12 486 10.1136/sextrans-2012-050685 [published Online First: 2013/03/15]  
13 487 24. Houlihan CF, Baisley K, Bravo IG, et al. Rapid acquisition of HPV around the time of sexual debut in adolescent girls  
14 488 in Tanzania. *Int J Epidemiol* 2016;45(3):762-73. doi: 10.1093/ije/dyv367 [published Online First: 2016/03/06]  
15 489 25. Baisley KJ, Andreasen A, Irani J, et al. HPV prevalence around the time of sexual debut in adolescent girls in  
16 490 Tanzania. *Sex Transm Infect* 2019 doi: 10.1136/sextrans-2019-054012 [published Online First: 2019/06/22]  
17 491 26. Koliopoulos G, Nyaga VN, Santesso N, et al. Cytology versus HPV testing for cervical cancer screening in the general  
18 492 population. *The Cochrane database of systematic reviews* 2017;8:Cd008587. doi:  
19 493 10.1002/14651858.CD008587.pub2 [published Online First: 2017/08/11]  
20 494 27. Linde DS, Andersen MS, Mwaiselage JD, et al. Text messages to increase attendance to follow-up cervical cancer  
21 495 screening appointments among HPV-positive Tanzanian women (Connected2Care): study protocol for a  
22 496 randomised controlled trial. *Trials* 2017;18(1):555. doi: 10.1186/s13063-017-2215-x [published Online First:  
23 497 2017/11/23]  
24 498 28. Linde DS, Rasch V, Mwaiselage JD, et al. Competing needs: a qualitative study of cervical cancer screening  
25 499 attendance among HPV-positive women in Tanzania. *BMJ open* 2019;9(2):e024011. doi: 10.1136/bmjopen-  
26 500 2018-024011 [published Online First: 2019/03/02]  
27 501 29. Linde DS AM, Mwaiselage JD, Manongi R, Kjaer SK, Rasch V. One-way text messages versus no text messages on  
28 502 attendance to follow-up cervical cancer screening among HPV-positive Tanzanian Women (Connected2Care):  
29 503 a parallel-group randomized controlled trial. *JMIR Preprints* 15/08/2019:15863 doi: DOI:  
30 504 10.2196/preprints.15863  
31 505 30. Bakiewicz A, Rasch V, Mwaiselage J, et al. "The best thing is that you are doing it for yourself" - perspectives on  
32 506 acceptability and feasibility of HPV self-sampling among cervical cancer screening clients in Tanzania: a  
33 507 qualitative pilot study. *BMC women's health* 2020;20(1):65. doi: 10.1186/s12905-020-00917-7 [published  
34 508 Online First: 2020/04/03]  
35 509 31. Katanga J, Kjaer SK, Manongi R, et al. Performance of careHPV, hybrid capture 2 and visual inspection with acetic  
36 510 acid for detection of high-grade cervical lesion in Tanzania: A cross-sectional study. *PLoS one*  
37 511 2019;14(6):e0218559. doi: 10.1371/journal.pone.0218559 [published Online First: 2019/06/20]  
38 512 32. Linde DS, Andersen MS, Mwaiselage J, et al. Effectiveness of One-Way Text Messaging on Attendance to Follow-Up  
39 513 Cervical Cancer Screening Among Human Papillomavirus-Positive Tanzanian Women (Connected2Care):  
40 514 Parallel-Group Randomized Controlled Trial. *Journal of medical Internet research* 2020;22(4):e15863. doi:  
41 515 10.2196/15863 [published Online First: 2020/04/03]  
42 516 33. McHome BL, Kjaer SK, Manongi R, et al. HPV types, cervical high-grade lesions and risk factors for oncogenic  
43 517 human papillomavirus infection among 3416 Tanzanian women. *Sex Transm Infect* 2020 doi:  
44 518 10.1136/sextrans-2019-054263 [published Online First: 2020/04/10]  
45 519 34. Cervical cancer prevention guidelines for low-resource settings. Available:  
46 520 [http://resources.jhpiego.org/system/files/resources/cecap\\_trainer\\_0.pdf](http://resources.jhpiego.org/system/files/resources/cecap_trainer_0.pdf). 2011  
47 521 35. Dartell M, Rasch V, Munk C, et al. Risk factors for high-risk human papillomavirus detection among HIV-negative  
48 522 and HIV-positive women from Tanzania. *Sexually transmitted diseases* 2013;40(9):737-43. doi:  
49 523 10.1097/olq.000000000000005 [published Online First: 2013/08/21]  
50 524 36. Paul D, Blumenthal NM. Cervical Cancer Prevention Guidelines for Low-Resource Settings 2007: Jhpiego; 2005  
51 525 [Available from: <http://reprolineplus.org/system/files/resources/CeCaPfullmanual.pdf>.  
52 526 37. Nayar R, Wilbur DC. The Pap Test and Bethesda 2014. "The reports of my demise have been greatly exaggerated."  
53 527 (after a quotation from Mark Twain). *Acta Cytol* 2015;59(2):121-32. doi: 10.1159/000381842 [published  
54 528 Online First: 2015/05/23]  
55 529 38. Xu L, Padalko E, Ostrbenk A, et al. Clinical Evaluation of INNO-LiPA HPV Genotyping EXTRA II Assay Using the  
56 530 VALGENT Framework. *Int J Mol Sci* 2018;19(9) doi: 10.3390/ijms19092704 [published Online First:  
57 531 2018/09/14]  
58 531  
59  
60

1  
2  
3  
4 532  
5  
6  
7  
8  
9  
10  
11  
12  
13  
14  
15  
16  
17  
18  
19  
20  
21  
22  
23  
24  
25  
26  
27  
28  
29  
30  
31  
32  
33  
34  
35  
36  
37  
38  
39  
40  
41  
42  
43  
44  
45  
46  
47  
48  
49  
50  
51  
52  
53  
54  
55  
56  
57  
58  
59  
60

For peer review only

1  
2  
3  
4  
5  
6  
7  
8  
9  
10  
11  
12  
13  
14  
15  
16  
17  
18  
19  
20  
21  
22  
23  
24  
25  
26  
27  
28  
29  
30  
31  
32  
33  
34  
35  
36  
37  
38  
39  
40  
41  
42  
43  
44  
45  
46  
47  
48  
49  
50  
51  
52  
53  
54  
55  
56  
57  
58  
59  
60

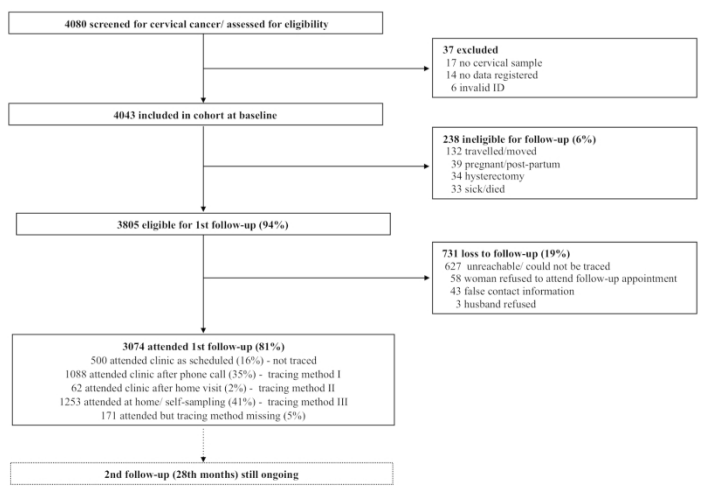

Flow chart

190x134mm (310 x 310 DPI)

## Appendix A: Project Description

### Comprehensive Cervical Cancer Prevention in Tanzania (CONCEPT)

#### 1. Project Summary

The natural history of Human papillomavirus (HPV) in sub-Saharan Africa is not yet fully understood. As persistent HPV infection is a necessary factor in development of cervical cancer – a major health problem in sub-Saharan Africa – information about how HIV together with other risk factors interacts with HPV acquisition and HPV persistence/clearance is warranted. Additionally, concern prevails about the quality of cervical cancer preventive strategies in sub-Saharan Africa. Against this background the project aims to provide a better understanding of the natural history of HPV with a view to HIV status, to measure the impact of a novel and simple screening method based on *CareHPV* testing and to assess how continuity of care among women who are tested HPV positive can be improved. The study will be linked up with the existing cervical cancer screening program at Ocean Road Cancer Institute (ORCI) and Kilimanjaro Christian Medical Centre (KCMC); and will include 4000 women who are attending screening service or HIV care and treatment. HPV acquisition and persistence/clearance patterns as well as the absolute risk of severe cervical precancerous lesions will be determined through a follow up study lasting 28 months. The test performance of *CareHPV* testing, liquid-based cytology and VIA will be described and the operating characteristics of the three screening methods will be assessed according to HIV status. Finally, the impact of a mobile phone intervention and a patient navigation model will be assessed and compared according to the proportion of HPV positive women who return for follow-up examinations. Additionally, the project will implement a research capacity building component focusing on transfer of knowledge and technology as well as training of PhD students. The activities will be carried out as five sub-studies: i) HPV acquisition pattern; ii) HPV persistence/clearance pattern; iii) Test performance of *CareHPV* testing, liquid-based cytology and VIA; iv) Continuity of care among screened positive women and v) research capacity building as well as transfer of knowledge and technology

#### 2. Objectives

With the overall aim of substantially improving cervical cancer prevention in Tanzania and thereby reduce mortality, the CONCEPT project focuses on the natural history of human papillomavirus (HPV), which is the most important risk factor for cervical cancer.

HPV can take the form of being either a transient infection, that relatively rapidly is cleared by the host immune system or it can become a persistent infection that may progress to high-grade cervical lesions or cervical cancer (**Fig. 1**). In spite of the fact that cervical cancer is the most common malignancy among women in Sub-Saharan Africa (1), little is known about the distribution of HPV types, risk factors of incidence and patterns of persistence for different HPV types. The proposed project will address this lack of knowledge and provide new information about the natural history of HPV and consequences of HPV infection among HIV positive and HIV negative women. In addition, there is concern about the performance of the screening approaches applied in many sub-Saharan African countries and information on the quality of novel, affordable screening approaches that will perform well in remote areas is warranted. Finally, in many sub-Saharan African settings worries prevail about lack of continuity of care among women who are diagnosed with precancerous lesions and therefore relevant treatment is not always offered. The proposed project will address these shortcomings in cervical cancer prevention. The research will build on the results previously obtained by our research team (2-6) and will be innovative in the way that it through a comprehensive approach will use the natural history of HPV to identify opportunities to strengthen and further develop the existing screening program in Tanzania, with a particular view to the importance of HIV positivity. In addition, with the aim to bridge the gap in continuity of care among women diagnosed with precancerous lesions, the project will develop and test a reliable and sustainable communication system through a multidisciplinary approach, involving community education, social mobilization and use of cell-phones. Thus the proposed study has the potential to produce results with immediate public health impact.

The specific objectives of the project are:

1. To assess acquisition patterns and incidence of HPV infection with a specific focus on differences in HPV acquisition, distribution of HPV types and risk factors among HIV positive and HIV negative women
2. To assess persistence of high-risk HPV infection with a specific focus on whether there are differences in HPV persistence in relation to specific HPV types and differences in risk factors for HPV persistence among HIV positive and HIV negative women. In addition, it is the aim to examine the absolute risk of HSIL or worse in relation to both one time HPV positivity and HPV persistence while taking HIV status into account
3. To evaluate the performance of Self collected *CareHPV* testing, health provider collected HPV test, Pap smear (liquid-based cytology) and visual inspection with acetic acid (VIA) for detection of cervical precancerous lesions with a special view to test performance among HIV positive and HIV negative women.
4. To evaluate and compare two different interventions aiming at ensuring continuity of care among women who are tested HPV positive in terms of effect and costs, and to describe barriers for not adhering to the scheduled follow-up
5. To enhance research capacity and transfer of knowledge and technology through the training of PhD students and the involvement of a post-doctoral fellow

### 3. Project's methodology

Based on the experience and success of our previous study of HPV prevalence in Tanzanian women, the present study will be linked up with the existing cervical cancer screening program in Dar es Salaam and Kilimanjaro Region. To make sure that we will include enough HIV positive women into the study, we will oversample HIV positive women. This will be done through enrolment of women attending HIV care and treatment in the two study areas. A total of 4000 women will be enrolled at baseline in the study - 3500 women from the two screening settings and 500 HIV positive women from two HIV care and treatment clinics. Based on our previous experience, among the 3500 women recruited from the screening settings, around 700 will be high-risk (HR)-HPV positive and nearly 350 women will be HIV positive(2). Among the 500 HIV positive women recruited from the HIV clinics, an estimated 250 women will be HPV positive(2). Hence, the total study sample of 4000 women will include an estimated 950 HPV positive and 850 HIV positive women. A power calculation was based on McNemars test in the situation where we compare two diagnostic tests (1: standard test (VIA) vs 2: new test (*CareHPV*)) where the outcome is sensitivity  $S_1$  and  $S_2$ , respectively. Based on our previous studies in Tanzania (4) it is estimated that 180-200 women will have precancerous lesions at baseline (~true positive), and we assume a significance level of 5% and that the sensitivity of the standard test is  $S_1=30\%$ . We will then with 80% power be able to detect a significant difference if the sensitivity of the new test is at least  $S_2=44\%$ . As we anticipate *CareHPV* testing to have a much higher sensitivity, we will have sufficient power in the present study

An overview of the study design is outlined in **Fig. 2**. In principle the study comprises a baseline visit and 2 follow-up visits:

**At baseline** we will collect on all participating women a cervical sample for *CareHPV* testing, a novel and simple quick test for detection of HPV. We will also obtain a liquid-based cervical swab (ThinPrep) for cytology examination (subsequently prepared and diagnosed in Denmark), high-risk Hybrid Capture (HC2) testing (in Germany), and genotyping (PCR-based HPV testing in Germany). Following this, VIA will be done with 5% acetic acid. The Tanzanian staff will receive training (re-training) in sample collection and VIA before start of the study by national trainers according to IARC guidelines. In case of a positive cytology (HSIL or worse) the woman will be called in and will be treated according to the cervical cancer screening standard of care methods in Tanzania. Similarly, all VIA positive women will be treated according to the cervical cancer screening standard of care methods in Tanzania. Information on socio-economic characteristics, lifestyle factors and reproductive history will be recorded through a personal

1  
2 interview, and blood samples for HIV testing will be obtained. Before the initiation of the study,  
3 the staff in Tanzania will receive training in *CareHPV* testing. The *CareHPV* (including currently  
4 known HR-HPV types 16, 18, 31, 33, 35, 39, 45, 51, 52, 56, 58, 59, 66, and 68) will be tested  
5 within 14 days in Tanzania. At the **first follow-up**, taking place 14 months after inclusion, a  
6 randomly selected sample of 500 women will be trained on self-collection of a cervical swab for  
7 HPV testing. Thereafter another cervical swab (ThinPrep) will be collected (on all study  
8 subjects in the 1<sup>st</sup> follow-up) by a trained health provider. At the **second follow-up**, taking  
9 place 26 months after inclusion, a cervical swab (ThinPrep) will be obtained from each woman.  
10 Women who do not return to the clinic for first and second follow-up will be traced and visited  
11 at home and invited to attend the clinic for screening. If they do not wish to re-attend, they  
12 will be offered screening through a self-collected HPV sample. We anticipate a response rate in  
13 the 1<sup>st</sup> follow-up at 90% and a response rate in the 2<sup>nd</sup> follow-up at 80%. The anticipated  
14 follow-up rate is based on experiences from previous follow-up studies in Tanzania (7).  
15 The study is grouped in five work package according to the specific objectives:  
16  
17

### **Work package 1, Acquisition patterns of high-risk (HR) human papillomavirus (HPV)**

**with a special view to HIV status:** Among women testing HR-HPV negative at baseline (Fig. 2), all women testing HIV positive (~190 from the screening clinic and 250 from HIV clinics = 440 in total) as well as a random sample of 560 HPV negative/HIV negative women will be invited to a new gynecological examination after 14 months (1<sup>st</sup> follow-up visit), where a health provider cervical swab (ThinPrep) sample on all women is taken. These samples will all be tested for HPV using HC2 and genotyping will be performed on the HPV positive samples. At the 2<sup>nd</sup> follow-up visit (at 26 months) a health provider taken cervical swab (ThinPrep) will be obtained. All samples from the 2<sup>nd</sup> follow-up will be sent to Denmark for establishment of a cytology diagnosis and the remaining material will be sent to Germany for HC2 testing and subsequent genotyping of the HPV positives. All cytology results and HPV results will be sent back to Tanzania. In case of a positive cytology (HSIL or worse) the woman will be called in and will be treated according to the cervical cancer screening standard of care methods in Tanzania.

Based on the literature (8) we estimate an HPV acquisition rate among the initially HPV negative women at 1<sup>st</sup> follow-up of around 10%, similarly an acquisition rate of 10% from the 1<sup>st</sup> to the 2<sup>nd</sup> follow-up. The association between HR-HPV acquisition and the women's age, life style characteristics, reproductive history and HIV status will be assessed.

### **Work package 2, Persistence patterns of high-risk HPV types and absolute risk of severe cervical lesions focusing on the importance of HIV status:**

Persistence/clearance patterns of HR-HPV will be determined among all women who are HR-HPV positive at baseline (Fig. 2) (~700 from the screening clinic and 250 from the HIV clinic i.e. ~950 in total). They will be invited for follow-up examinations and tested for HR-HPV after 14 and 26 months (1<sup>st</sup> and 2<sup>nd</sup> follow-up visit). For this group of women also a self-collected cervical swab will be obtained at the 1<sup>st</sup> follow-up in 500 randomly selected women. HPV genotyping will be performed among women who are HR-HPV positive during follow-up. Women who are persistently HPV positive for the same HPV type at enrolment and at 1<sup>st</sup> follow-up will be called in for a cytological examination at the respective clinic. Also in case of a positive cytology (HSIL or worse), the women will be called in for further follow-up. HR-HPV persistence/clearance patterns will be described in relation to the women's age, life style characteristics, reproductive history, HIV status and HPV genotype. We estimate a persistence rate of 40% after 14 months and of 20% after 26 months (9). Due to the fact that a cytology diagnosis is obtained on all women at the 2<sup>nd</sup> follow-up, we will also be able to look at the absolute risk of HSIL or worse in relation to both one time HPV positivity, HPV persistence and according to HIV status.

### **Work package 3, Test performance of CareHPV testing, pap smear and VIA for detection of cervical precancerous lesions:**

As described above, all 4000 women enrolled will be screened by use of *CareHPV* testing, Pap smear (liquid based cytology i.e. ThinPrep) and VIA at the study baseline, and the sensitivity and specificity of *CareHPV* testing and VIA will be estimated and the positive and negative predictive values calculated. The operating

1  
2 characteristics of the two screening methods will be assessed according to HIV status. All VIA  
3 positive women will subsequently be treated in agreement with the cervical cancer screening  
4 standard of care methods in Tanzania. In case of a positive cytology that was not already  
5 identified through a positive VIA, the women will be called in for further follow-up. High-quality  
6 cervical liquid-based cytology and where possible also cervical biopsies will be used as Gold  
7 Standard. Based on the samples collected at the 1<sup>st</sup> follow-up, the HPV results from the self-  
8 collected brush and the health provider collected brush will be compared.  
9

10 **Work package 4, Continuity of care among women who are tested are HPV positive –**  
11 **a comparison of two different interventions:** Women who are tested HPV positive at  
12 enrolment will be randomized to either a patient navigation model or a cell phone model  
13 consisting of automated SMS messages. *Patient navigation model:* A trained community health  
14 worker will be identified as the woman's patient navigator. There will be established a one-to-  
15 one relationship between the patient navigator and the woman to address anticipated barriers  
16 such as communication difficulties and difficulties with arranging transportation. *Cell phone*  
17 *model:* HPV positive women will receive automatically generated SMS messages, which will  
18 convey HPV result, send appointment reminders and health information during the first 12-14  
19 months follow-up period. After 20 months, the continuity of care, based on the number of HPV  
20 positive women who return for the 1<sup>st</sup> follow-up examination after 14 months, will be  
21 compared. Additionally, the average time spent providing navigation from an HPV positive  
22 result is established to 12-14 months after and the associated cost will be calculated. Likewise  
23 the price of establishing and maintaining the system generating the SMS reminders will be  
24 measured. The differences in total costs and re-attendance between patient navigation and  
25 SMS reminders will be calculated. Re-attendance will be defined as HPV positive woman who  
26 re-attend within 12-14 months after the HPV positive result is established. Finally, HPV positive  
27 women who do not re-attend for screening after 12-14 months will be traced and interviewed.  
28 A mixed method approach, relying on structured questionnaires, in-depth interview and key  
29 informant interviews will be used to describe perceived barriers for attending 12-14 months  
30 follow-up.  
31  
32  
33

34 **Work package 5, Health service capacity building for cervical cancer**  
35 **prevention:** Health service capacity building will be performed at primary, secondary and  
36 tertiary level. At the primary and secondary levels, key barriers for optimal use of existing  
37 communication paths for ensuring continuity of care among women diagnosed with  
38 precancerous lesions will be identified through a register based desk study. Based on the  
39 results, interview guides will be developed for in-depth interviews with health providers  
40 working at primary and secondary level and community representatives. The experiences from  
41 this assessment will be used to develop a training program in cervical cancer prevention and  
42 patient navigation that will include staff at primary and secondary health units together with  
43 community health workers in Dar es Salaam and Kilimanjaro Region. The trained community  
44 health worker will be employed as patient navigators. At tertiary level, the project will respond  
45 to the research needs set forth by ORCI and KCMC. Three PhD courses, one in Clinical Trials,  
46 one in Prevention and Control of Gynaecological Cancers and one in Policy Brief Writing will be  
47 offered at KCMC in alignment with the exiting BSU initiatives at KCMC. The PhD courses will be  
48 co-developed and co-taught by Tanzanian and Danish researchers. At both ORCI and KCMC  
49 there is a need to strengthen the capacities of researchers to undertake in-country PhD  
50 training at an international level. To address this need, four PhD studies, three Tanzanian and  
51 one Danish (co funded by SDU), will be included in the project. The Tanzanian PhD students  
52 will be recruited through public announcement of the scholarships and competitive  
53 applications. Two of the Tanzanian PhD students will be enrolled at KCMC and one at ORCI.  
54 They will additionally conduct 3 months of academic work each year in Denmark. The project  
55 will be performed as a twinning arrangement where the Tanzanian and the Danish PhD  
56 students will work closely together. To increase the expertise within HPV epidemiology and  
57 HPV testing in Tanzania and thereby increase the sustainability of the project outcomes, a  
58 post-doctoral fellow, Crispin Kahesa (CK), who has obtained his PhD as part of our previous  
59 research (2-6, 9) and who is presently acting as national trainer for the cervical cancer  
60

1  
2 prevention program in Tanzania, will be employed in the project. He will be visiting Institute of  
3 Medical Virology at Tuebingen University in Germany to get detailed knowledge about HPV  
4 testing and HPV analyses. In addition, to enhance local expertise in cervical cancer screening  
5 and HPV testing, a faculty exchange to the International Agency for Research on Cancer  
6 (IARC) in Lyon will also be arranged. Finally, to further upgrade CK's academic skills he will be  
7 involved as a co-supervisor of the two PhD projects focusing on Cervical Cancer Screening and  
8 Continuity of Care and write two independent papers based on the research findings.  
9

10 Ethical research permissions will be obtained from the Ministry of Health in Tanzania and from  
11 local authorities in Dar es Salaam and Kilimanjaro. Ethical clearance will be obtained from the  
12 Ethical Review Board at KCMC and ORCI as well as from the Ethical Review Board of the  
13 National Institute of Medical Research. The project will follow the international ethical  
14 guidelines developed by CIOMS (Council for International Organization of Medical Sciences),  
15 placing particular emphasis on ensuring participant safety. Hence, women who have a positive  
16 cytology (HSIL or worse) will be called in and treated according to Tanzanian standard of care.  
17 Similarly, women who are persistently HPV positive will be traced, and liquid-based cytology  
18 samples will be obtained and analyzed. In case of a positive cytology result (HSIL or worse),  
19 the women will be offered colposcopy directed biopsies and treatment according to the cervical  
20 cancer screening national guidelines. Informed written consent will be obtained from research  
21 participants and confidentiality guaranteed. The trial will be registered at ClinicalTrials.gov and  
22 trial analyses and reports will be made in accordance with CONSORT requirements. It is an  
23 important part of the study that all women will have a cytology examination when they exit the  
24 study after 26 months and we will make sure that all women are cared for in the best possible  
25 way.  
26  
27

#### 28 **4. Expected outputs and outcomes**

29 The project will produce 4 PhD theses, at least 14 scientific papers published in international,  
30 peer-reviewed journals, at least 5 articles published in popular journals/magazines, at least 6  
31 conference papers (4 national and 2 international), and a minimum of 12 research updates and  
32 policy briefs.  
33

34  
35 The expected outcomes of the project are:

- 36 • New knowledge about the natural history of HPV infection and consequences of HPV  
37 infection among HIV positive and HIV negative women
- 38 • New approaches in performing cervical cancer screening. On the basis of the research,  
39 possible improvements of the screening program will be identified, with a particular view to  
40 implementation of HPV testing and improved continuity of care.
- 41 • A cadre of health staff and community health workers who are trained in cervical cancer  
42 control and prevention and who through an improved communication line will help facilitate  
43 on-going care and treatment to women who are screened positive
- 44 • Improved capacities among researchers to conduct interdisciplinary and internationally  
45 informed research on primary and secondary prevention of cervical cancer
- 46 • Decreased mortality from cervical cancer due to detection of precancerous lesions and  
47 earlier detection of cervical cancer
- 48 • Reduced poverty through enhancement of women's sexual and reproductive health. To a  
49 high degree cervical cancer is diagnosed in women at reproductive age and is thus leading  
50 to high numbers of premature deaths with substantial social and economic consequences at  
51 an individual level and in society. Prevention of cervical cancer will therefore have an impact  
52 on reduction of poverty and sustainable development in society.  
53  
54  
55

#### 56 **5. Relevance**

57 In Tanzania, cervical cancer is the commonest type of cancer in women, and that with the  
58 highest mortality rate. Annually, approximately 7300 new cases are diagnosed and about  
59 4200 women die from cervical cancer(11). Thus cervical cancer is a public health problem that  
60 has enormous social and economic population impact as it often affects women at reproductive



age(12). To address this public health problem, the project will provide new and important information on the natural history of HPV and how it relates to HIV, information that will be of help in the development of more efficient vaccines and screening strategies that targets HIV positive and HIV negative women. The project also aims to evaluate *CareHPV* testing (a simple to do test) as a tool for cervical cancer screening and to examine how continuity of care of women who are screened positive can be improved by two simple low cost interventions. The information generated from the project will help inform the future screening strategy in Tanzania as well as in other countries with high HIV prevalence. We will make it a priority that beside the publication of our results in scientific journals, we will communicate the results to decision makers, stakeholders and to the general population. The focus areas of our research, HPV, HIV and cervical cancer are well in line with the "Tanzanian National Health Research Policy" from 2013 that lists Communicable diseases, Non-communicable diseases and Reproductive health as top-three priority areas. Our research areas are also aligned with the Tanzanian Health Sector Strategic Plan III (HSSP III 2009-2015), supported by Danida, which also lists reproductive health and communicable and non-communicable diseases as priority areas. The project does also have relevance in relation to overall objectives and priorities of Danish development cooperation as expressed in The Right to a Better Life which states that "Denmark will be at the forefront of international efforts to promote sexual and reproductive health and rights, and in the fight against HIV/AIDS". Finally, through the linkage with KCMC, the activities are also in line with Danida priorities for research capacity building, since KCMC is one of the core institutions in the Building Stronger University (BSU) program.

## 6. Project plan

Since the project plan is complex and dynamic with interactions between multiple WPs, the key priorities will be to facilitate the necessary interactions between the WPs and to maintain the overall scientific direction over the life of the project. The project will start in January 2015 and end in December 2019. The existing ORCI and KCMC institutional bank accounts will be used for the project; and the existing financial and procurement regulations will be used for implementing the project in Tanzania. The main project milestones and timetable are shown on **Fig. 3**. The detailed budget is attached in the main application and it shows how the resource allocation in the project will be distributed between the institutions involved over the project period.

## 7. Participants, organization and management

**Julius Mwaiselage** is a medical doctor and epidemiologist and public health specialist. He is the Director of Cancer Prevention Services at ORCI. He has 9 years experiences in cancer epidemiological research in Tanzania and has been involved in various collaborative research projects focusing on HPV prevalence, cervical cancer screening and HPV vaccine introduction in Tanzania. He has authored more than 20 scientific papers in peer-reviewed journals and supervised 3 PhD students and more than 15 master's students. **Vibeke Rasch** is a gynaecologist and professor in global reproductive health. She has almost 20 years experiences in reproductive health research in Tanzania, has acted as principal responsible party in an enhancing research capacity building project in Vietnam and has been member of the BSU steering committee. She has authored more than 100 scientific publications and supervised 16 PhD students, more than half from sub-Saharan Africa and Asia. **Susanne Krüger Kjær** is a medical doctor and professor of cancer epidemiology. Her main research areas are HPV and cancer and the importance of gene-environment interactions in cancer development with a focus on clinical utility and the translational aspect. She has authored more than 350 scientific papers, and she is the Danish primary investigator on the clinical, randomised trials of the efficacy of HPV vaccination. She has supervised more than 25 Phd students. **Twalib Ngoma** is a professor of oncology. He has more than 25 years of experience in teaching, clinical work and research related to cancer. He is the executive director of ORCI and the head of clinical oncology department of Muhimbili University College of Health and Allied Science. **Rachel Manongi** is Head of Community Medicine Department at KCMC, she has a record of community based research with a special focus on HIV prevention and sustainable health promotion and has also been active in the establishment of a cervical cancer registry at KCMC. She has authored more than 40 papers in international journals.

1  
2  
3 The project builds on and extends existing collaboration between these Tanzanian and Danish  
4 researchers. The involved Danish researchers have solid experience in research capacity  
5 building in Tanzania and in HPV research and both have strong publication records. The  
6 proposed project will be undertaken in close coordination with the research capacity building  
7 activities conducted within the BSU initiative. The overall responsibility for the project lies with  
8 the main Tanzanian applicant. To facilitate cross-country project management, a Steering  
9 Board will be established between Tanzanian and Danish collaborators. A project management  
10 unit (PMU) will be established at ORCI. The PMU will consist of a project secretary and an  
11 accountant and will be responsible for day-to-day activities. To monitor the activities, a web-  
12 based project management tool will be established. The web tool will include detailed updated  
13 work plans linked to the work packages so partners can track project progress. Project  
14 documents will be available on the web-site. Members of the Steering Board will meet on a  
15 regular basis to ensure a continuous progress of the study. In addition, annual workshop  
16 meetings will be held with representatives from the partner institutions.

### 17 18 19 **8. Project's international dimension**

20 There is a great international interest in cervical cancer prevention focusing on different  
21 screening modalities, HPV testing and HPV vaccination, and it is one of the areas where  
22 substantial progress has been made in recent years and it is also one of the areas where  
23 research has the greatest translational potential. The suggested project relies heavily on  
24 collaboration between researchers in Tanzania, Denmark, Germany and France who have  
25 strong expertise in HPV epidemiology, HPV testing technology, cervical cancer screening  
26 approaches, and international health. Through this international collaboration, we will obtain a  
27 strong and valuable synergy. By means of this project there will be a great opportunity for  
28 transfer of knowledge and technology to Tanzania, which in a longer perspective may be  
29 further transferred to neighbouring sub-Saharan African countries with similar high prevalence  
30 rates of HPV and HIV.

### 31 32 33 **9. New knowledge**

34 Virtually all cases of cervical cancers and high-grade precursor lesions are caused by a  
35 persistent infection with HPV(13). Although effective prophylactic vaccines against HPV have  
36 been developed, they are still relatively expensive and logistically demanding as they currently  
37 require a 3-dose regimen. Furthermore, they do not treat already existing HPV infections and  
38 related diseases. Several African cross-sectional studies of the prevalence of HPV have been  
39 performed, including our own from Tanzania where we found an HPV prevalence of 20.1%  
40 among 3700 women(2). In the same study we found that 9.3% of the women were HIV  
41 positive. In contrast, only few prospective studies on HPV epidemiology have been conducted  
42 in Africa. Of these, some had a limited sample size (14), some did only include HIV negative  
43 women(9) or exclusively used self-sampled cervical swabs(15). In spite of the fact that  
44 cervical cancer is the most common malignancy among women in Sub-Saharan Africa(1), little  
45 is known about the distribution of HPV types, independent risk factors of incidence and  
46 patterns of persistence for different HPV types. Even though HPV16 has been found to be  
47 common in sub-Saharan African women, some studies have reported HPV52 and HPV58 to be  
48 more prevalent(2). Data on which HPV types are more likely to persist in relation to HIV status  
49 are scarce, particularly in HIV positive individuals. Results from the proposed study will add  
50 important information to our knowledge about the natural history of HPV in an HIV high-risk  
51 area and will be helpful in tailoring screening programs to match the needs of HIV positive and  
52 HIV negative women.

53  
54  
55 The conventional cytology screening (Pap smear followed by colposcopically-directed biopsies)  
56 demands costly cytology laboratories with skilled and highly experienced personnel, and  
57 multiple visits at regular intervals are needed. Consequently, the Pap smear screening is  
58 neither sufficiently developed nor sustainable in less developed countries(16). Therefore, cost  
59 effective methods such as VIA have been adopted in several countries for early detection of  
60 precancerous lesions. In 2002 cervical cancer screening based on VIA was implemented at

ORCI and the program has subsequently been scaled up to cover other regions in Tanzania. However, several studies, including our own recent study, have found VIA to have a limited sensitivity(4). In contrast, HPV screening is appealing due to a higher sensitivity and a higher negative predictive value(17). However, successful HPV screening in countries with limited resources requires a simple HPV test that will perform well also in remote areas and which is affordable. Finally, self-sampling will most likely be needed to make screening practical in some settings. . In relation to these issues, our study will contribute new knowledge which can immediately be used and implemented to the benefit of the women.

A successful programme for cervical cancer prevention requires function in its entirety. The programme should ensure high levels of screening coverage of the target population, offer high quality services, have good referral systems that guarantee patient follow-up and make certain that women receive appropriate treatment. Experiences from Tanzania mainland have documented that these preconditions are often not adhered to due to a poor functioning health system and as a consequence the screening results are often not conveyed and proper action not always taken. Currently, there is no mechanism in place in Tanzania to help women navigate between the potential barriers, which may be hindering factors for obtaining confirmatory diagnosis and adequate treatment of cervical precancerous lesions. Mobile Health, which implies the use of mobile communication devices for health care, is seen as a complementary strategy for strengthening health systems and the use of SMS has successfully been used to remind patients to take drugs and attend appointment e.g.in Kenya(18). Similarly, members of our research team have documented the effect of SMS on antenatal care attendance and skilled delivery attendance in Tanzania(7).The Patient Navigation Model is an alternative approach to enhance continuity of care among underserved populations. The navigators can be trained community health workers or peer educators who provide support and guidance (19). Patient navigation is used as a standard of care in most of Western oncological departments and has been proven to be successful in several studies e.g: Cancer control among urban African American (20) and Breast cancer screening(21). Understanding the acceptance of these two proposed models among Tanzanian women detected to have HPV will help health care professionals to develop more effective continuum of care programs by promoting attendance to HPV screening and follow-up of disease progression.

## 10. Publication and dissemination strategy

The research findings will be communicated via a project website, scientific paper in peer-reviewed journals and popular articles. Further to get maximum impact of the findings, a stakeholder workshop focusing on cervical cancer screening and continuity of care will be held at the beginning and at the end of the project. The invitees will include Women's groups representatives, civil society, health care providers, health sector officials and researchers. The workshop will involve stakeholders in the formulation of intervention strategies, which will enhance continuity of care among women who are screened positive. Further, at the end of the project period a policy brief workshop facilitated by a communication expert will be held and will result in the formulation of a policy brief that summarizes the research findings and provides recommendations to decision makers. The policy brief will be produced and shared at a national dissemination seminar where health policy makers, Danida representatives and other relevant stakeholder are invited.

## 11. Strategy for phasing out of the project

The project will be undertaken in cooperation with Ministry of Health officials and with health system representatives. Based on the research conducted within each work package, concrete recommendations for improved cervical cancer prevention will be developed and shared with health policy makers and other stakeholders. Since the PI is Director of Cancer Preventive service in Tanzania at ORCI and a member of the Ministry of Health technical working group for cervical cancer prevention and control in Tanzania, he will ensure the recommendations of the project are sent to the respective authorities and implemented. Initially most of the technical recommendations from the project will be implemented at ORCI, KCMC and among cervical cancer screening implementing partners in Tanzania after update of the cervical cancer

screening national service delivery guidelines. Furthermore, through a phased and participatory approach, the policy recommendations for the Ministry of Health, will be discussed at the relevant level of authority in order to ensure the updated policy guidelines and ministerial circulars for cervical cancer include the project recommendations on improvement, particularly on continuity of care. The Tanzanian post-doctoral and PhD students will be in the forefront in the implementation and sustainability of the comprehensive cervical cancer prevention in Tanzania given the knowledge and skills obtained in the project; and it is anticipated that they will be employed by ORCI and KCMC or even at the Ministry of Health. The established cohort of HPV positive women will be kept and maintained at ORCI for future studies on HPV persistence and clearance patterns and women’s absolute risk of subsequently developing precancerous lesions (17).

**Fig. 1: Natural history of human papillomavirus (HPV) infection and cervical precancerous lesions**

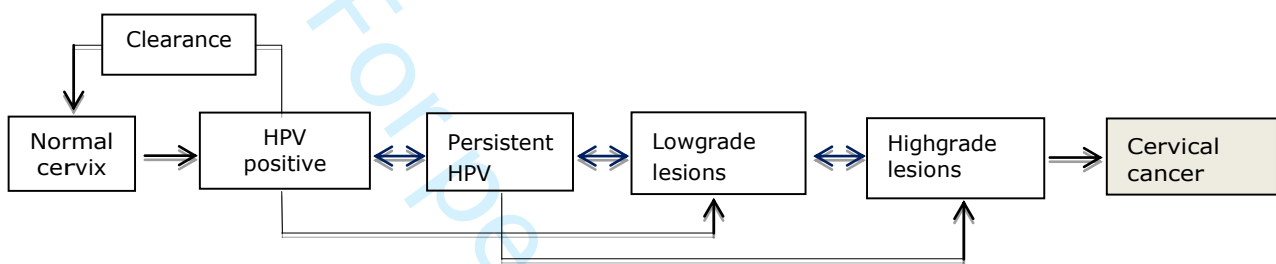

**Fig 2: The schematic overview of the study design**

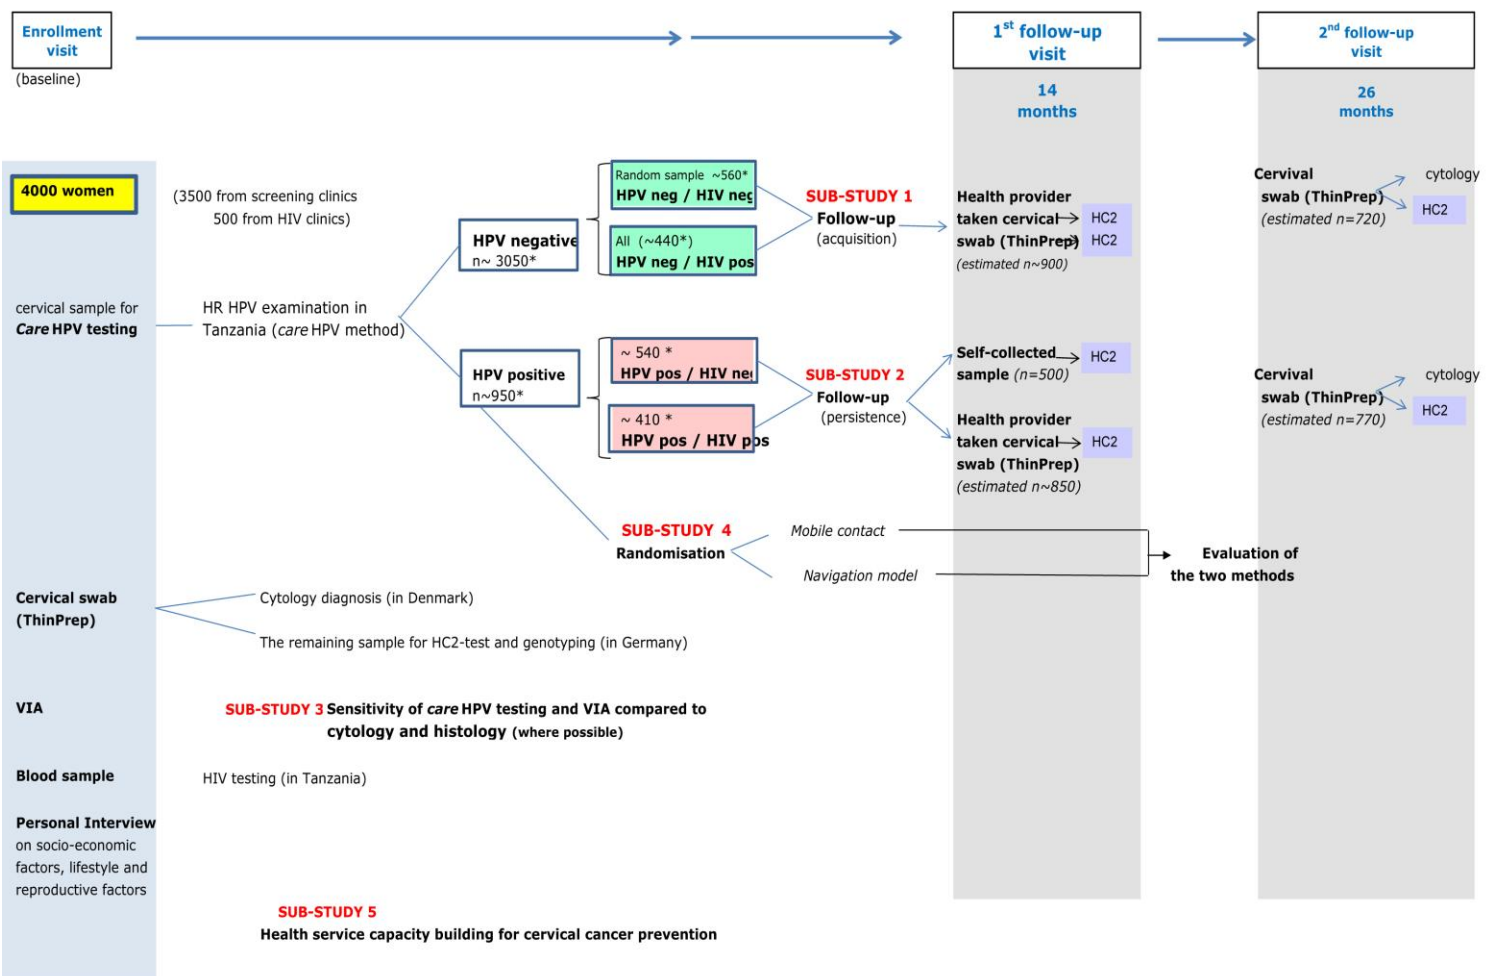

\* numbers estimated on the basis of recent finding in Tanzania (Dartell et al)

**Fig 3: The schematic overview of the project milestones and timetable**

| FIG 3: THE SCHEMATIC OVERVIEW OF THE PROJECT MILESTONES AND TIMETABLE                                                                                                                                                                                                                                                                                        |      |    |    |    |      |    |    |    |      |    |    |    |      |    |    |    |      |    |    |    |               |  |
|--------------------------------------------------------------------------------------------------------------------------------------------------------------------------------------------------------------------------------------------------------------------------------------------------------------------------------------------------------------|------|----|----|----|------|----|----|----|------|----|----|----|------|----|----|----|------|----|----|----|---------------|--|
| MILESTONES                                                                                                                                                                                                                                                                                                                                                   | 2015 |    |    |    | 2016 |    |    |    | 2017 |    |    |    | 2018 |    |    |    | 2019 |    |    |    | Work packages |  |
|                                                                                                                                                                                                                                                                                                                                                              | Q1   | Q2 | Q3 | Q4 |               |  |
| Project commencement                                                                                                                                                                                                                                                                                                                                         | ■    | ■  |    |    |      |    |    |    |      |    |    |    |      |    |    |    |      |    |    |    | WP1,2,3,4,5   |  |
| Announcement and recruitment of PhD students                                                                                                                                                                                                                                                                                                                 | ■    | ■  |    |    |      |    |    |    |      |    |    |    |      |    |    |    |      |    |    |    | WP1,2,3,4     |  |
| Enrollment of PhD students into universities                                                                                                                                                                                                                                                                                                                 |      |    | ■  |    |      |    |    |    |      |    |    |    |      |    |    |    |      |    |    |    | WP1,2,3,4     |  |
| PhD students attending university PhD program                                                                                                                                                                                                                                                                                                                |      |    |    | ■  | ■    | ■  | ■  | ■  | ■    | ■  | ■  | ■  | ■    | ■  | ■  | ■  |      |    |    |    | WP1,2,3,4     |  |
| Establishment of research sites                                                                                                                                                                                                                                                                                                                              |      |    | ■  | ■  |      |    |    |    |      |    |    |    |      |    |    |    |      |    |    |    | WP1,2,3,4     |  |
| Recruitment and training of research assistants                                                                                                                                                                                                                                                                                                              |      |    | ■  |    |      |    |    |    |      |    |    |    |      |    |    |    |      |    |    |    | WP1,2,3,4     |  |
| Data and specimen collection in Tanzania                                                                                                                                                                                                                                                                                                                     |      |    |    | ■  | ■    | ■  | ■  | ■  | ■    | ■  | ■  | ■  | ■    | ■  | ■  | ■  |      |    |    |    | WP1,2,3       |  |
| Randomization of women                                                                                                                                                                                                                                                                                                                                       |      |    |    | ■  | ■    | ■  |    |    |      |    |    |    |      |    |    |    |      |    |    |    | WP4           |  |
| Assessment of continuity of care among randomized women                                                                                                                                                                                                                                                                                                      |      |    |    |    |      |    |    |    | ■    | ■  | ■  | ■  |      |    |    |    |      |    |    |    | WP4           |  |
| Conducting PhD courses                                                                                                                                                                                                                                                                                                                                       |      |    |    |    |      | ■  |    |    |      | ■  |    |    |      |    |    |    |      |    |    |    | WP5           |  |
| Postdoc fellow attached in research institution in France and Germany                                                                                                                                                                                                                                                                                        |      |    |    |    |      |    |    |    | ■    |    |    |    |      |    | ■  |    |      |    |    |    | WP5           |  |
| Publications                                                                                                                                                                                                                                                                                                                                                 |      |    |    |    |      |    |    | ■  | ■    | ■  | ■  | ■  | ■    | ■  | ■  | ■  | ■    | ■  | ■  | ■  | WP1,2,3,4,5   |  |
| PhD thesis submissions                                                                                                                                                                                                                                                                                                                                       |      |    |    |    |      |    |    |    |      |    |    |    |      |    |    |    | ■    | ■  |    |    | WP1,2,3,4     |  |
| Defence of PhD thesis                                                                                                                                                                                                                                                                                                                                        |      |    |    |    |      |    |    |    |      |    |    |    |      |    |    |    |      |    | ■  | ■  | WP1,2,3,4     |  |
| Dissemination of research findings                                                                                                                                                                                                                                                                                                                           |      |    |    |    |      |    |    |    |      |    |    |    |      |    |    |    |      |    |    | ■  | WP1,2,3,4,5   |  |
| Project completion and phasing out                                                                                                                                                                                                                                                                                                                           |      |    |    |    |      |    |    |    |      |    |    |    |      |    |    |    |      |    |    | ■  | WP1,2,3,4,5   |  |
| <p><b>Note:</b> Project commencement involves planning meeting of researchers, setting up of the project office, and ensuring ethical clearance is obtained from relevant bodies</p> <p><b>Note:</b> Project completion involves writing of the final project report, final auditing of the project, phasing out of the project to ensure sustainability</p> |      |    |    |    |      |    |    |    |      |    |    |    |      |    |    |    |      |    |    |    |               |  |

## 12. Main References

1. **Ferlay J**, Shin HR, Bray F, Forman D, Mathers C, Parkin DM. Estimates of worldwide burden of cancer in 2008: GLOBOCAN 2008. *International Journal of Cancer* 2010 Dec 15;127(12):2893-917.
2. **Dartell M**, Rasch V, Kahesa C, Mwaiselage J, Ngoma T, Junge J, et al. Human papillomavirus prevalence and type distribution in 3603 HIV-positive and HIV-negative women in the general population of Tanzania: the PROTECT study. *Sexually Transmitted Diseases*. 2012 Mar;39(3):201-8.
3. **Dartell M**, Rasch V, Munk C, Kahesa C, Mwaiselage J, Iftner T, et al. Risk factors for high-risk human papillomavirus detection among HIV-negative and HIV-positive women from Tanzania. *Sexually Transmitted Diseases*. 2013 Sep;40(9):737-43.
4. **Dartell MA**, Rasch V, Iftner T, Kahesa C, Mwaiselage JD, Junge J, et al. Performance of visual inspection with acetic acid and human papillomavirus testing for detection of high-grade cervical lesions in HIV positive and HIV negative Tanzanian women. *International Journal of Cancer* 2014 Jan 4. PubMed PMID: 24391021. Epub 2014/01/07. Eng.
5. **Kahesa C**, Kjaer S, Mwaiselage J, Ngoma T, Tersbol B, Dartell M, et al. Determinants of acceptance of cervical cancer screening in Dar es Salaam, Tanzania. *BMC Public Health*. 2012;12:1093.
6. **Kahesa C**, Kjaer SK, Ngoma T, Mwaiselage J, Dartell M, Iftner T, et al. Risk factors for VIA positivity and determinants of screening attendances in Dar es Salaam, Tanzania. *BMC Public Health*. 2012;12:1055. PubMed PMID: 23216752.
7. **Lund S**, Hemed M, Nielsen BB, Said A, Said K, Makungu MH, et al. Mobile phones as a health communication tool to improve skilled attendance at delivery in Zanzibar: a cluster-randomised controlled trial. *BJOG* 2012 Sep;119(10):1256-64. PubMed PMID: 22805598.
8. **Nielsen A**, Iftner T, Munk C, Kjaer SK. Acquisition of high-risk human papillomavirus infection in a population-based cohort of Danish women. *Sexually Transmitted Diseases* 2009 Oct;36(10):609-15.
9. **Fukuchi E**, Sawaya GF, Chirenje M, Magure T, Tuveson J, Ma Y, et al. Cervical human papillomavirus incidence and persistence in a cohort of HIV-negative women in Zimbabwe. *Sexually Transmitted Diseases*. 2009 May;36(5):305-11. PubMed PMID: 19295468.
10. **Olesen TB**, Iftner T, Mwaiselage J, Kahesa C, Rasch V, Ngoma T, et al. Prevalence and type distribution of human papillomavirus among 1813 men in Tanzania and the relationship to HIV status. *Sexually Transmitted Diseases*. 2013 Jul;40(7):592-8. PubMed PMID: 23965778. Epub 2013/08/24. eng.
11. Human Papillomavirus and Related Diseases in Tanzania. Summary Report [Internet]. ICO Information Centre on HPV and Cancer.
12. **Chokunonga E**, Borok MZ, Chirenje ZM, Nyakabau AM, Parkin DM. Trends in the incidence of cancer in the black population of Harare, Zimbabwe 1991-2010. *International Journal of Cancer* 2013 Aug 1;133(3):721-9. PubMed PMID: 23364833. Epub 2013/02/01. eng.
13. **Kjaer SK**, van den Brule AJ, Bock JE, Poll PA, Engholm G, Sherman ME, et al. Human papillomavirus-the most significant risk determinant of cervical intraepithelial neoplasia. *International Journal of Cancer* 1996 Mar 1;65(5):601-6.
14. **Veldhuijzen NJ**, Vyankandondera J, van de Wijgert JH. HIV acquisition is associated with prior high-risk human papillomavirus infection among high-risk women in Rwanda. *AIDS (London, England)*. 2010 Sep 10;24(14):2289-92. PubMed PMID: 20613457. Epub 2010/07/09. eng.
15. **Safaeian M**, Kiddugavu M, Gravitt PE, Gange SJ, Ssekasanvu J, Murokora D, et al. Determinants of incidence and clearance of high-risk human papillomavirus infections in rural Rakai, Uganda. *Cancer Epidemiology, Biomarkers & Prevention* 2008 Jun;17(6):1300-7.
16. **Denny L**. Cytological screening for cervical cancer prevention. *Best practice & research Clinical obstetrics & gynaecology*. 2012 Apr;26(2):189-96. PubMed PMID: 22071306. Epub 2011/11/11. eng.
17. **Kjaer SK**, Frederiksen K, Munk C, Iftner T. Long-term absolute risk of cervical intraepithelial neoplasia grade 3 or worse following human papillomavirus infection: role of persistence. *Journal of the National Cancer Institute*. 2010 Oct 6;102(19):1478-88. PubMed PMID: 20841605.
18. **Lester RT**, Ritvo P, Mills EJ, Kariri A, Karanja S, Chung MH, et al. Effects of a mobile phone short message service on antiretroviral treatment adherence in Kenya (WelTel Kenya1): a randomised trial. *Lancet*. 2010 Nov 27;376(9755):1838-45. PubMed PMID: 21071074.
19. **Honeycutt S**, Green R, Ballard D, Hermstad A, Brueder A, Haardorfer R, et al. Evaluation of a patient navigation program to promote colorectal cancer screening in rural Georgia, USA. *Cancer*. 2013 Aug 15;119(16):3059-66. PubMed PMID: 23719894.
20. **Halbert CH**, Briggs V, Bowman M, Bryant B, Bryant DC, Delmoor E, et al. Acceptance of a community-based navigator program for cancer control among urban African Americans. *Health education research*. 2014 Feb;29(1):97-108. PubMed PMID: 24173501.
21. **Lee JH**, Fulp W, Wells KJ, Meade CD, Calcano E, Roetzheim R. Patient navigation and time to diagnostic resolution: results for a cluster randomized trial evaluating the efficacy of patient navigation among patients with breast cancer screening abnormalities, Tampa, FL. *PloS one*. 2013;8(9):e74542. PubMed PMID:

STROBE Statement—Checklist of items that should be included in reports of *cohort studies*

|                              | Item No | Recommendation                                                                                                                                                                       | Response                                                                                                                                                                                                          |
|------------------------------|---------|--------------------------------------------------------------------------------------------------------------------------------------------------------------------------------------|-------------------------------------------------------------------------------------------------------------------------------------------------------------------------------------------------------------------|
| Title and abstract           | 1       | (a) Indicate the study's design with a commonly used term in the title or the abstract                                                                                               | Indicated as Cohort in all appropriate sections                                                                                                                                                                   |
|                              |         | (b) Provide in the abstract an informative and balanced summary of what was done and what was found                                                                                  | Indicated in the section "abstract"                                                                                                                                                                               |
| <b>Introduction</b>          |         |                                                                                                                                                                                      |                                                                                                                                                                                                                   |
| Background/rationale         | 2       | Explain the scientific background and rationale for the investigation being reported                                                                                                 | Explanation provided in the "Introduction" section                                                                                                                                                                |
| Objectives                   | 3       | State specific objectives, including any prespecified hypotheses                                                                                                                     | These has been provided in ll. 33-34; 126-128                                                                                                                                                                     |
| <b>Methods</b>               |         |                                                                                                                                                                                      |                                                                                                                                                                                                                   |
| Study design                 | 4       | Present key elements of study design early in the paper                                                                                                                              | Indicated in the sub section "study design and study population", ll. 131-180                                                                                                                                     |
| Setting                      | 5       | Describe the setting, locations, and relevant dates, including periods of recruitment, exposure, follow-up, and data collection                                                      | Indicated in the sub sections "study design and study population", ll. 131-180; "assessment of exposure, ll. 181-237; "outcome measures; ll. 239-248; "table 1: Overview of data collected in the CONCEPT cohort" |
| Participants                 | 6       | (a) Give the eligibility criteria, and the sources and methods of selection of participants. Describe methods of follow-up                                                           | Indicated in the sub sections "study design and study population", ll. 131-180; "assessment of exposure, ll. 181-237; "outcome measures; ll. 239-248;                                                             |
|                              |         | (b) For matched studies, give matching criteria and number of exposed and unexposed                                                                                                  | NA - No matching was done                                                                                                                                                                                         |
| Variables                    | 7       | Clearly define all outcomes, exposures, predictors, potential confounders, and effect modifiers. Give diagnostic criteria, if applicable                                             | Indicated in the sub sections "assessment of exposure, ll. 181-237; "outcome measures; ll. 239-248                                                                                                                |
| Data sources/<br>measurement | 8*      | For each variable of interest, give sources of data and details of methods of assessment (measurement). Describe comparability of assessment methods if there is more than one group | Description of this item has been provided in table 1 - Overview of data collection                                                                                                                               |
| Bias                         | 9       | Describe any efforts to address potential sources of bias                                                                                                                            | Indicated in the sub sections                                                                                                                                                                                     |

|    |                        |     |                                                                                                                                                                                                             |                                                                                                                                                                                                             |
|----|------------------------|-----|-------------------------------------------------------------------------------------------------------------------------------------------------------------------------------------------------------------|-------------------------------------------------------------------------------------------------------------------------------------------------------------------------------------------------------------|
|    |                        |     | “assessment of exposure, ll. 181-237;<br>“outcome measures; ll. 239-248                                                                                                                                     |                                                                                                                                                                                                             |
| 1  |                        |     |                                                                                                                                                                                                             |                                                                                                                                                                                                             |
| 2  |                        |     |                                                                                                                                                                                                             |                                                                                                                                                                                                             |
| 3  | Study size             | 10  | Explain how the study size was arrived at                                                                                                                                                                   |                                                                                                                                                                                                             |
| 4  | Quantitative variables | 11  | Explain how quantitative variables were handled in the analyses. If applicable, describe which groupings were chosen and why                                                                                |                                                                                                                                                                                                             |
| 5  |                        |     | An overview of data management has been provided in the sub section “Data management”, ll. 250-257. Detailed description of the statistical analysis may be provided in the respective individual articles. |                                                                                                                                                                                                             |
| 6  |                        |     |                                                                                                                                                                                                             |                                                                                                                                                                                                             |
| 7  |                        |     |                                                                                                                                                                                                             |                                                                                                                                                                                                             |
| 8  |                        |     |                                                                                                                                                                                                             |                                                                                                                                                                                                             |
| 9  |                        |     |                                                                                                                                                                                                             |                                                                                                                                                                                                             |
| 10 |                        |     |                                                                                                                                                                                                             |                                                                                                                                                                                                             |
| 11 |                        |     |                                                                                                                                                                                                             |                                                                                                                                                                                                             |
| 12 | Statistical methods    | 12  | (a) Describe all statistical methods, including those used to control for confounding                                                                                                                       |                                                                                                                                                                                                             |
| 13 |                        |     |                                                                                                                                                                                                             | An overview of data management has been provided in the sub section “Data management”, ll. 250-257. Detailed description of the statistical analysis may be provided in the respective individual articles. |
| 14 |                        |     |                                                                                                                                                                                                             |                                                                                                                                                                                                             |
| 15 |                        |     |                                                                                                                                                                                                             |                                                                                                                                                                                                             |
| 16 |                        |     |                                                                                                                                                                                                             |                                                                                                                                                                                                             |
| 17 |                        |     |                                                                                                                                                                                                             |                                                                                                                                                                                                             |
| 18 |                        |     |                                                                                                                                                                                                             |                                                                                                                                                                                                             |
| 19 |                        |     |                                                                                                                                                                                                             |                                                                                                                                                                                                             |
| 20 |                        |     |                                                                                                                                                                                                             |                                                                                                                                                                                                             |
| 21 |                        |     |                                                                                                                                                                                                             |                                                                                                                                                                                                             |
| 22 |                        |     |                                                                                                                                                                                                             |                                                                                                                                                                                                             |
| 23 |                        |     |                                                                                                                                                                                                             |                                                                                                                                                                                                             |
| 24 |                        |     |                                                                                                                                                                                                             |                                                                                                                                                                                                             |
| 25 |                        |     |                                                                                                                                                                                                             |                                                                                                                                                                                                             |
| 26 |                        |     |                                                                                                                                                                                                             |                                                                                                                                                                                                             |
| 27 |                        |     |                                                                                                                                                                                                             |                                                                                                                                                                                                             |
| 28 |                        |     |                                                                                                                                                                                                             |                                                                                                                                                                                                             |
| 29 |                        |     |                                                                                                                                                                                                             |                                                                                                                                                                                                             |
| 30 |                        |     |                                                                                                                                                                                                             |                                                                                                                                                                                                             |
| 31 |                        |     |                                                                                                                                                                                                             |                                                                                                                                                                                                             |
| 32 |                        |     |                                                                                                                                                                                                             |                                                                                                                                                                                                             |
| 33 |                        |     |                                                                                                                                                                                                             |                                                                                                                                                                                                             |
| 34 |                        |     |                                                                                                                                                                                                             |                                                                                                                                                                                                             |
| 35 | <b>Results</b>         |     |                                                                                                                                                                                                             |                                                                                                                                                                                                             |
| 36 | Participants           | 13* | (a) Report numbers of individuals at each stage of study—eg numbers potentially eligible, examined for eligibility, confirmed eligible, included in the study, completing follow-up, and analysed           |                                                                                                                                                                                                             |
| 37 |                        |     |                                                                                                                                                                                                             | This information has been provided in the flow chart, figure 1.                                                                                                                                             |
| 38 |                        |     |                                                                                                                                                                                                             |                                                                                                                                                                                                             |
| 39 |                        |     |                                                                                                                                                                                                             |                                                                                                                                                                                                             |
| 40 |                        |     |                                                                                                                                                                                                             |                                                                                                                                                                                                             |
| 41 |                        |     |                                                                                                                                                                                                             |                                                                                                                                                                                                             |
| 42 |                        |     |                                                                                                                                                                                                             |                                                                                                                                                                                                             |
| 43 |                        |     |                                                                                                                                                                                                             |                                                                                                                                                                                                             |
| 44 |                        |     |                                                                                                                                                                                                             |                                                                                                                                                                                                             |
| 45 |                        |     |                                                                                                                                                                                                             |                                                                                                                                                                                                             |
| 46 |                        |     |                                                                                                                                                                                                             |                                                                                                                                                                                                             |



|                                  |                          |     |                                                                                                                                                                                                              |                                                                                                                  |    |
|----------------------------------|--------------------------|-----|--------------------------------------------------------------------------------------------------------------------------------------------------------------------------------------------------------------|------------------------------------------------------------------------------------------------------------------|----|
| 1<br>2<br>3<br>4<br>5<br>6<br>7  | Descriptive data         | 14* | (a) Give characteristics of study participants (eg demographic, clinical, social) and information on exposures and potential confounders                                                                     | Relevant characteristics of the participants and their distribution has been provided in Table 2                 |    |
| 8                                |                          |     | (b) Indicate number of participants with missing data for each variable of interest                                                                                                                          | Information on missing values has been provided for each variable in Table 2 & Table 3                           |    |
| 9                                |                          |     | (c) Summarise follow-up time (eg, average and total amount)                                                                                                                                                  |                                                                                                                  |    |
| 10<br>11<br>12                   | Outcome data             | 15* | Report numbers of outcome events or summary measures over time                                                                                                                                               | Table 2 and 3 provide a measure of important events at a baseline and follow-up                                  |    |
| 13<br>14<br>15<br>16<br>17<br>18 | Main results             | 16  | (a) Give unadjusted estimates and, if applicable, confounder-adjusted estimates and their precision (eg, 95% confidence interval). Make clear which confounders were adjusted for and why they were included | Table 3 provides Confidence interval of the important outcome measures at baseline and on follow up              |    |
| 19                               |                          |     |                                                                                                                                                                                                              | (b) Report category boundaries when continuous variables were categorized                                        |    |
| 20                               |                          |     |                                                                                                                                                                                                              | (c) If relevant, consider translating estimates of relative risk into absolute risk for a meaningful time period | NA |
| 21                               | Other analyses           | 17  | Report other analyses done—eg analyses of subgroups and interactions, and sensitivity analyses                                                                                                               | NA                                                                                                               |    |
| 22                               | <b>Discussion</b>        |     |                                                                                                                                                                                                              |                                                                                                                  |    |
| 23<br>24                         | Key results              | 18  | Summarise key results with reference to study objectives                                                                                                                                                     | NA. Cohort profile. However, summarized in “abstract”.                                                           |    |
| 25<br>26<br>27                   | Limitations              | 19  | Discuss limitations of the study, taking into account sources of potential bias or imprecision. Discuss both direction and magnitude of any potential bias                                                   | Indicated in the section “Strengths and limitations”, ll. 319-338.                                               |    |
| 28<br>29<br>30                   | Interpretation           | 20  | Give a cautious overall interpretation of results considering objectives, limitations, multiplicity of analyses, results from similar studies, and other relevant evidence                                   | NA. Cohort profile                                                                                               |    |
| 31<br>32<br>33                   | Generalisability         | 21  | Discuss the generalisability (external validity) of the study results                                                                                                                                        | Indicated in the section “Strengths and limitations”, ll. 319-338.                                               |    |
| 34                               | <b>Other information</b> |     |                                                                                                                                                                                                              |                                                                                                                  |    |
| 35<br>36<br>37<br>38             | Funding                  | 22  | Give the source of funding and the role of the funders for the present study and, if applicable, for the original study on which the present article is based                                                | Indicated in the section “financial disclosure, ll. 359-361.                                                     |    |

\*Give information separately for exposed and unexposed groups.

1  
2  
3  
4  
5  
6  
7  
8  
9  
10  
11  
12  
13  
14  
15  
16  
17  
18  
19  
20  
21  
22  
23  
24  
25  
26  
27  
28  
29  
30  
31  
32  
33  
34  
35  
36  
37  
38  
39  
40  
41  
42  
43  
44  
45  
46  
47  
48  
49  
50  
51  
52  
53  
54  
55  
56  
57  
58  
59  
60

---

Study number

# Concept

## Comprehensive Prevention of Cervical Cancer in Tanzania



Study site: ORCI  KCMC  MAGOMENI  MAWENZI

Date \_\_\_\_\_ Study number \_\_\_\_\_

Health Provider Initials \_\_\_\_\_ Participant initials \_\_\_\_\_

## BACKGROUND

1.

How old are you?   years

2. Are you:

|                              |                            |
|------------------------------|----------------------------|
| Married, monogamous          | 1 <input type="checkbox"/> |
| Married, polygamous          | 2 <input type="checkbox"/> |
| Cohabiting                   | 3 <input type="checkbox"/> |
| Single, with regular partner | 4 <input type="checkbox"/> |
| Single, no regular partner   | 5 <input type="checkbox"/> |
| Divorced/ Widow              | 6 <input type="checkbox"/> |

How long have you known your husband / cohabiter / regular partner?

years   months

3. With whom are you presently living?

|                     |                            |
|---------------------|----------------------------|
| Husband / cohabiter | 1 <input type="checkbox"/> |
| Parents             | 2 <input type="checkbox"/> |
| Parents in law      | 3 <input type="checkbox"/> |
| Other relatives     | 4 <input type="checkbox"/> |
| Friends             | 5 <input type="checkbox"/> |
| Nobody              | 6 <input type="checkbox"/> |

1  
2  
3  
4  
5  
6  
7  
8  
9  
10  
11  
12  
13  
14  
15  
16  
17  
18  
19

4. What is the highest level of formal education you have completed?

|                        |                            |
|------------------------|----------------------------|
| No formal education    | 1 <input type="checkbox"/> |
| Standard 1-4           | 2 <input type="checkbox"/> |
| Standard 5-7           | 3 <input type="checkbox"/> |
| Form 1-4               | 4 <input type="checkbox"/> |
| Form 5-6               | 5 <input type="checkbox"/> |
| University/college     | 6 <input type="checkbox"/> |
| Other _____<br>Specify | 8 <input type="checkbox"/> |

20  
21  
22  
23  
24  
25  
26  
27  
28  
29  
30  
31  
32

5. What is your religion?

|                        |                            |
|------------------------|----------------------------|
| Christian              | 1 <input type="checkbox"/> |
| Muslim                 | 2 <input type="checkbox"/> |
| Other _____<br>Specify | 3 <input type="checkbox"/> |

33  
34  
35  
36  
37  
38

**LIFESTYLE HABITS AND HEALTH**

39  
40  
41  
42  
43  
44  
45  
46  
47  
48  
49  
50  
51

6. Do you smoke cigarettes?

|                                 |                            |
|---------------------------------|----------------------------|
| Yes, every day                  | <input type="checkbox"/> 1 |
| Yes, at least once a week       | <input type="checkbox"/> 2 |
| Yes, but less than once a week  | <input type="checkbox"/> 3 |
| No, but I previously smoked     | <input type="checkbox"/> 4 |
| No, never → (go to question 11) | <input type="checkbox"/> 5 |

52  
53  
54  
55  
56  
57  
58  
59  
60

7. How old were you, when you started to smoke cigarettes regularly?

(i.e. at least once a week)

age \_\_\_\_\_ years

8. How many years have you smoked cigarettes regularly? (subtract periods of smoking cessation)

number of years: \_\_\_\_\_

1  
2  
3  
4 **9. If you are a current smoker, how much do you smoke on an average day?**

5  
6  
7  
8  
9  
10  
11  
12  
13  
14  
15  
16  
17  
18  
19  
20  
21  
22  
23  
24  
25  
26  
27  
28  
29  
30  
31  
32  
33  
34  
35  
36  
37  
38  
39  
40  
41  
42  
43  
44  
45  
46  
47  
48  
49  
50  
51  
52  
53  
54  
55  
56  
57  
58  
59  
60

number of cigarettes: \_\_\_\_\_

**10. If you no longer smoke cigarettes, how old were you when you stopped smoking?**

age \_\_\_\_\_ years

**11. Have you ever drunk alcohol and if yes, how old were you when you started drinking alcohol?**

| Have never been drinking                                     | 12 years or younger                   | 13-14 years                           | 15-16 years                           | 17-18 years                           | 19-20 years                           | 21 years or older                     |
|--------------------------------------------------------------|---------------------------------------|---------------------------------------|---------------------------------------|---------------------------------------|---------------------------------------|---------------------------------------|
| <input type="checkbox"/> <sub>1</sub><br>(Go to question 14) | <input type="checkbox"/> <sub>2</sub> | <input type="checkbox"/> <sub>3</sub> | <input type="checkbox"/> <sub>4</sub> | <input type="checkbox"/> <sub>5</sub> | <input type="checkbox"/> <sub>6</sub> | <input type="checkbox"/> <sub>7</sub> |

**12. How much per week do you usually drink of the following types of alcohol?**

|            |                                           |                      |
|------------|-------------------------------------------|----------------------|
| Beer       | No. of <u>glasses</u> per week on average | <input type="text"/> |
| Local brew | No. of <u>drinks</u> per week on average  | <input type="text"/> |
| Wine       | No. of <u>glasses</u> per week on average | <input type="text"/> |
| Liquor     | No. of <u>drinks</u> per week on average  | <input type="text"/> |

(1 bottle of wine = 6 glasses, 1 bottle of liquor = 20 drinks, 1 bottle of beer = 2 glasses)

**13. How many times per month on average do you have more than 6 drinks on the same occasion?**

| Never                                 | Less than once a <u>month</u>         | 1-3 times per <u>month</u>            | 4-8 times per <u>month</u>            | <u>≥ 9 times per month</u>            |
|---------------------------------------|---------------------------------------|---------------------------------------|---------------------------------------|---------------------------------------|
| <input type="checkbox"/> <sub>1</sub> | <input type="checkbox"/> <sub>2</sub> | <input type="checkbox"/> <sub>3</sub> | <input type="checkbox"/> <sub>4</sub> | <input type="checkbox"/> <sub>5</sub> |

**14. How do you regard your own health?**

|                                       |                                       |                                       |                                       |                                       |
|---------------------------------------|---------------------------------------|---------------------------------------|---------------------------------------|---------------------------------------|
| Excellent                             | Very good                             | Good                                  | Less good                             | Bad                                   |
| <input type="checkbox"/> <sub>1</sub> | <input type="checkbox"/> <sub>2</sub> | <input type="checkbox"/> <sub>3</sub> | <input type="checkbox"/> <sub>4</sub> | <input type="checkbox"/> <sub>5</sub> |

15. How do you perceive your body size?

|                            |                            |                            |                            |                            |
|----------------------------|----------------------------|----------------------------|----------------------------|----------------------------|
| Much too thick             | A little too thick         | Good                       | A little too thin          | Much too thin              |
| <input type="checkbox"/> 1 | <input type="checkbox"/> 2 | <input type="checkbox"/> 3 | <input type="checkbox"/> 4 | <input type="checkbox"/> 5 |

**REPRODUCTIVE HEALTH and SEXUAL HABITS**

16. Have you ever been pregnant?

|       |                                                |
|-------|------------------------------------------------|
| - yes | 1 <input type="checkbox"/>                     |
| - no  | 2 <input type="checkbox"/> → Go to question 17 |

**If yes:**

|                             |                        |
|-----------------------------|------------------------|
| Total number of pregnancies | 1 <input type="text"/> |
| Total number of births      | 2 <input type="text"/> |

How old were you at the first pregnancy?  years

How old were you when you gave birth to your first child?  years

17. Did you ever have a sexual partner?

|       |                                              |
|-------|----------------------------------------------|
| - yes | 1 <input type="checkbox"/>                   |
| - no  | 2 <input type="checkbox"/> Go to question 21 |

**If yes:**

How old were you at first intercourse?  years

How old was your first partner at that time?  years

1  
2  
3 **18. How many sexual partners did you have during your lifetime?**

|  |  |  |
|--|--|--|
|  |  |  |
|--|--|--|

 number

4  
5  
6 **19. Did you have sexual intercourse within the last 12 months?**

|       |   |                          |
|-------|---|--------------------------|
| - yes | 1 | <input type="checkbox"/> |
| - no  | 2 | <input type="checkbox"/> |

7  
8  
9  
10  
11  
12  
13  
14  
15  
16 **If yes:**

17 **How often have you used condoms during the last 12 months?**

|                                         |   |                          |
|-----------------------------------------|---|--------------------------|
| At every sexual intercourse             | 1 | <input type="checkbox"/> |
| Frequently but not at every intercourse | 2 | <input type="checkbox"/> |
| Rarely                                  | 3 | <input type="checkbox"/> |
| Only sexual intercourse without condoms | 4 | <input type="checkbox"/> |

18  
19  
20  
21  
22  
23  
24  
25  
26  
27  
28  
29  
30  
31 **20. Is your husband / cohabiter / regular partner circumcised?**

|                                          |   |                          |
|------------------------------------------|---|--------------------------|
| Yes                                      | 1 | <input type="checkbox"/> |
| No                                       | 2 | <input type="checkbox"/> |
| No husband / cohabiter / regular partner | 3 | <input type="checkbox"/> |

32  
33  
34  
35  
36  
37  
38  
39  
40  
41  
42  
43  
44 **21. Has a doctor or other health care provider told you that you had genital warts (condyloma)?**

|       |   |                          |
|-------|---|--------------------------|
| - yes | 1 | <input type="checkbox"/> |
| - no  | 2 | <input type="checkbox"/> |

45  
46  
47  
48  
49  
50  
51  
52  
53  
54  
55 **If yes:**

56  
57  
58 **How old were you when you had genital warts for the first time?**

|  |  |
|--|--|
|  |  |
|--|--|

 years

Have you had genital warts in the last 12 months?

|       |   |                          |
|-------|---|--------------------------|
| - yes | 1 | <input type="checkbox"/> |
| - no  | 2 | <input type="checkbox"/> |

22. Have you ever been screened against cervical cancer?

|       |   |                          |
|-------|---|--------------------------|
| - yes | 1 | <input type="checkbox"/> |
| - no  | 2 | <input type="checkbox"/> |

**If yes:**

Has a doctor or other health care provider told you that you had precancerous lesions on the cervix?

|       |   |                          |                   |
|-------|---|--------------------------|-------------------|
| - yes | 1 | <input type="checkbox"/> |                   |
| - no  | 2 | <input type="checkbox"/> | Go to question 23 |

When did you have your last diagnose of precancerous lesions?

|  |  |
|--|--|
|  |  |
|--|--|

calendar month

|  |  |  |  |
|--|--|--|--|
|  |  |  |  |
|--|--|--|--|

calendar year

Which treatment did you receive?

|                |   |                          |
|----------------|---|--------------------------|
| - Cryo therapy | 1 | <input type="checkbox"/> |
| - LEEP         | 2 | <input type="checkbox"/> |
| - Don't know   | 3 | <input type="checkbox"/> |



23. Has a doctor or other health care provider told you that you had one of the following sexually transmitted diseases?

|                   |                                           |                                          |               |                                     |
|-------------------|-------------------------------------------|------------------------------------------|---------------|-------------------------------------|
| <b>Chlamydia</b>  | <sub>1</sub> <input type="checkbox"/> Yes | <sub>2</sub> <input type="checkbox"/> No | <b>If yes</b> | Age at first episode _____<br>Years |
| <b>Gonorrhoea</b> | <sub>1</sub> <input type="checkbox"/> Yes | <sub>2</sub> <input type="checkbox"/> No | <b>If yes</b> | Age at first episode _____<br>Years |
| <b>Syphilis</b>   | <sub>1</sub> <input type="checkbox"/> Yes | <sub>2</sub> <input type="checkbox"/> No | <b>If yes</b> | Age at first episode _____<br>Years |

24. Have you ever been tested for HIV?

|       |                                       |
|-------|---------------------------------------|
| - yes | <sub>1</sub> <input type="checkbox"/> |
| - no  | <sub>2</sub> <input type="checkbox"/> |

**If yes:**

**Have you ever tested positive?**

|       |                                       |                          |
|-------|---------------------------------------|--------------------------|
| - yes | <sub>1</sub> <input type="checkbox"/> |                          |
| - no  | <sub>2</sub> <input type="checkbox"/> | <b>Go to question 25</b> |

**If yes:**

**When did you test positive?**

calendar month

calendar year

**When did you have your last CD4 count test?**

*(If more than 6 months ago → refer the woman for a new test)*

calendar month

calendar year

**What was the result of the CD4 count? \_\_\_\_\_ number**

1  
2  
3  
4  
5  
6  
7  
8  
9  
10  
11  
12  
13  
14  
15  
16  
17  
18  
19  
20  
21  
22  
23  
24  
25  
26  
27  
28  
29  
30  
31  
32  
33  
34  
35  
36  
37  
38  
39  
40  
41  
42  
43  
44  
45  
46  
47  
48  
49  
50  
51  
52  
53  
54  
55  
56  
57  
58  
59  
60

**Have you ever been started on ARV treatment?**

|       |   |                          |
|-------|---|--------------------------|
| - yes | 1 | <input type="checkbox"/> |
| - no  | 2 | <input type="checkbox"/> |

**If yes:**

**started when ?**

|                    |                                |                               |               |                                        |                                       |
|--------------------|--------------------------------|-------------------------------|---------------|----------------------------------------|---------------------------------------|
| <b>First line</b>  | 1 <input type="checkbox"/> Yes | 2 <input type="checkbox"/> No | <b>If yes</b> | <input type="text"/><br>calendar month | <input type="text"/><br>calendar year |
| <b>Second line</b> | 1 <input type="checkbox"/> Yes | 2 <input type="checkbox"/> No | <b>If yes</b> | <input type="text"/><br>calendar month | <input type="text"/><br>calendar year |
| <b>Third line</b>  | 1 <input type="checkbox"/> Yes | 2 <input type="checkbox"/> No | <b>If yes</b> | <input type="text"/><br>calendar month | <input type="text"/><br>calendar year |

**What is your CTC card number?**

\_\_\_\_\_ Clinic name                      \_\_\_\_\_ Card number

**What is your CTC file number?**

\_\_\_\_\_ File number

**If you do not know, can we call you and get the number?**

|       |   |                          |
|-------|---|--------------------------|
| - yes | 1 | <input type="checkbox"/> |
| - no  | 2 | <input type="checkbox"/> |

**TAARIFA KUHUSU SARATANI YA SHINGO YA KIZAZI***(KNOWLEDGE OF CERVICAL CANCER)***25. Sentensi zifuatazo zinahusu saratani ya shingo ya kizazi. Sema kweli au si kweli kwa kila sentensi***(Here are some statements about cervical cancer. I will ask you to answer which are true and which are false)*

|                                                                                                                                                                                                                         |                                |                                   |
|-------------------------------------------------------------------------------------------------------------------------------------------------------------------------------------------------------------------------|--------------------------------|-----------------------------------|
| <b>1. Malaria (mbu) inasababisha saratani ya shingo ya kizazi</b><br><i>(Malaria (mosquito) causes cervical cancer)</i>                                                                                                 | Kweli <input type="checkbox"/> | Si kweli <input type="checkbox"/> |
| <b>2. Kupata maumivu wakati wa kukojoa ni dalili ya saratani ya shingo ya kizazi</b><br><i>(Pain during urination can be a sign of cervical cancer)</i>                                                                 | Kweli <input type="checkbox"/> | Si kweli <input type="checkbox"/> |
| <b>3. Saratani ya shingo ya kizazi ndiyo inayoongoza kwa magonjwa ya kanza za wanawake hapa Tanzania</b><br><i>(Cervical cancer is the most common cancer disease among Tanzanian women)</i>                            | Kweli <input type="checkbox"/> | Si kweli <input type="checkbox"/> |
| <b>4. Unaweza kupata saratani ya shingo ya kizazi kwa kubusiana</b><br><i>(You can get cervical cancer from deep kissing)</i>                                                                                           | Kweli <input type="checkbox"/> | Si kweli <input type="checkbox"/> |
| <b>5. Inawezekana kujikinga na saratani ya shingo ya kizazi</b><br><i>(It is possible to prevent cervical cancer)</i>                                                                                                   | Kweli <input type="checkbox"/> | Si kweli <input type="checkbox"/> |
| <b>6. Kutokwa damu ukeni ni dalili kuu ya ugonjwa wa saratani ya shingo ya kizazi</b><br><i>(Vaginal bleeding is the most common sign of cervical cancer)</i>                                                           | Kweli <input type="checkbox"/> | Si kweli <input type="checkbox"/> |
| <b>7. Jua kali linaweza kusababisha saratani ya shingo ya kizazi</b><br><i>(Too much sun can lead to cervical cancer)</i>                                                                                               | Kweli <input type="checkbox"/> | Si kweli <input type="checkbox"/> |
| <b>8. Maambukizi ya kwenye shingo ya kizazi mara zote hubadilika kuwa saratani</b><br><i>(A cervical infection will always turn into cancer)</i>                                                                        | Kweli <input type="checkbox"/> | Si kweli <input type="checkbox"/> |
| <b>9. Wanawake wenye VVU wako kwenye hatari kubwa ya kupata saratani ya shingo ya kizazi</b><br><i>(HIV-positive women have higher risk of developing cervical cancer)</i>                                              | Kweli <input type="checkbox"/> | Si kweli <input type="checkbox"/> |
| <b>10. Saratani ya shingo ya kizazi mara nyingi hugundulika mapema kutokana na dalili zake</b><br><i>(Cervical cancer is often found at an early stage due to obvious symptoms)</i>                                     | Kweli <input type="checkbox"/> | Si kweli <input type="checkbox"/> |
| <b>11. Unaweza kupata saratani ya shingo ya kizazi kwa kujamiiana bila kinga</b><br><i>(You can get cervical cancer from unprotected sexual intercourse)</i>                                                            | Kweli <input type="checkbox"/> | Si kweli <input type="checkbox"/> |
| <b>12. Kupima afya kunaweza kugundua maambukizi ya kwenye shingo ya kizazi na kuyazuia yasibalike kuwa saratani</b><br><i>(Screening can detect cervical infections so they do not develop into cancer)</i>             | Kweli <input type="checkbox"/> | Si kweli <input type="checkbox"/> |
| <b>13. Saratani ya shingo ya kizazi inaongoza kwa kusababisha vifo vinavyotokana na saratani kwa wanawake hapa Tanzania</b><br><i>(Cervical cancer is the main cause of cancer-related death among Tanzanian women)</i> | Kweli <input type="checkbox"/> | Si kweli <input type="checkbox"/> |
| <b>14. Saratani ya shingo ya kizazi mara nyingi huwapata wanawake wakiwa kwenye miaka ya ishirini.</b><br><i>(Cervical cancer is most common for women in their 20's)</i>                                               | Kweli <input type="checkbox"/> | Si kweli <input type="checkbox"/> |
| <b>15. Kuwashwa ukeni kunaweza kuwa ni dalili ya saratani ya shingo ya kizazi</b><br><i>(Itchiness in the vaginal area can be a sign of cervical cancer)</i>                                                            | Kweli <input type="checkbox"/> | Si kweli <input type="checkbox"/> |
| <b>16. Kirusi kinachoitwa Human papilloma virus ndicho kisababishacho saratani ya shingo ya kizazi</b><br><i>(A virus called "Human papilloma virus" (HPV) causes cervical cancer)</i>                                  | Kweli <input type="checkbox"/> | Si kweli <input type="checkbox"/> |

**UKUBALI WA UJUMBE MFUPI KUPITIA SIMU YA MKONONI**  
(ACCEPTANCE OF MOBILE MESSAGES)

**UTANGULIZI (Introduction):**

*Kwenye utafiti huu wanawake watatakiwa kurudi baada ya miezi 14. Baadhi ya wanawake watatumiwa ujumbe kupitia simu ya mkononi wenye taarifa za afya na kukukumbusha siku ya kurudi kliniki. Nitakuuliza maswali machache kuhusu ujumbe wa kupitia simu ya mkononi*

*(In this study, all women will get a new appointment at the clinic after 14 months. However, some women will also receive health information and reminders of their appointment via sms. Here are some questions about mobile messages.)*

**26. Utajisikiaje ukipata ujumbe mfupi wenye taarifa kuhusu saratani ya shingo ya kizazi na upimaji wake kwenye simu yako au ya familia yako? (Chagua tabasamu sahihi kuonyesha utakavyojisikia)**

*(How do you feel about receiving health information and reminders of your appointment via sms on your or your family's mobile phone? Choose the one smiley that best shows how you feel)*



**Siipendi kabisa**  
*I do not like it at all*



**Siipendi**  
*I do not like it*



**Sio sawa**  
*It is not okay*



**Sawa**  
*It is okay*

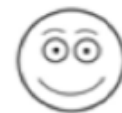

**Naipenda**  
*I like it*

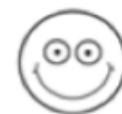

**Naipenda sana**  
*I like it very much*

1  
2  
3  
4  
5  
6  
7  
8  
9  
10  
11  
12  
13  
14  
15  
16  
17  
18  
19  
20  
21  
22  
23  
24  
25  
26  
27  
28  
29  
30  
31  
32  
33  
34  
35  
36  
37  
38  
39  
40  
41  
42  
43  
44  
45  
46  
47  
48  
49  
50  
51  
52  
53  
54  
55  
56  
57  
58  
59  
60

**27. Utajisikiaje ukipata ujumbe mfupi wenye taarifa kuhusu saratani ya shingo ya kizazi na upimaji wake kwenye simu yako au ya familia yako? (Weka alama ya mstari wima kuonyesha utakavyojisikia).**

*(How do you feel about receiving health information and reminders of your appointment via sms on your or your family's mobile phone? Make one vertical mark on the line similar to how you feel)*

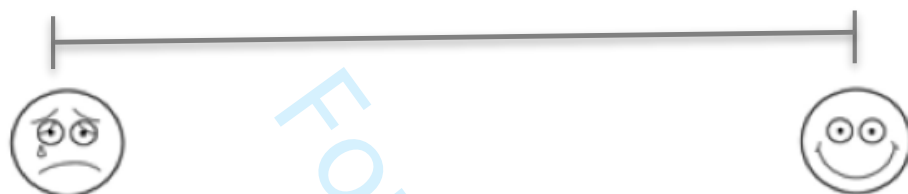

**Thanks a lot for your help**

**If there are any comments to add, please write them below**

---

---

---

---

---

1  
2  
3  
4  
5  
6  
7  
8  
9  
10  
11  
12  
13  
14  
15  
16  
17  
18  
19  
20  
21  
22  
23  
24  
25  
26  
27  
28  
29  
30  
31  
32  
33  
34  
35  
36  
37  
38  
39  
40  
41  
42  
43  
44  
45  
46  
47  
48  
49  
50  
51  
52  
53  
54  
55  
56  
57  
58  
59  
60

\_\_\_\_\_

Baseline Study number

\_\_\_\_\_

Follow-up Study number

For peer review only

# Concept

Comprehensive Prevention of Cervical Cancer in Tanzania

## FOLLOW-UP QUESTIONNAIRE

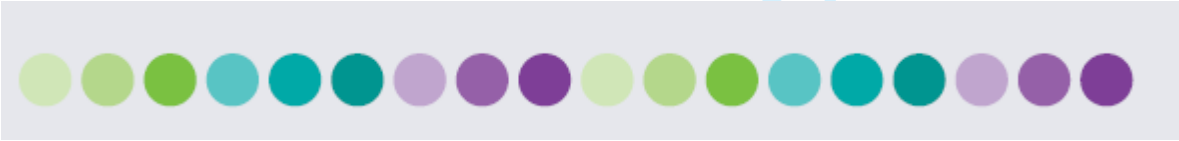

Study site: ORCI KCMC MAWENZI 

Date \_\_\_\_\_

Follow-up Study number \_\_\_\_\_

Baseline Study number \_\_\_\_\_

Health Provider Initials \_\_\_\_\_

Participant initials \_\_\_\_\_

**REPRODUCTIVE HEALTH and SEXUAL HABITS****1. Have you given birth since your last screening visit?**

|       |   |                                             |
|-------|---|---------------------------------------------|
| - yes | 1 | <input type="checkbox"/>                    |
| - no  | 2 | <input type="checkbox"/> → Go to question 2 |

**If yes:**

|                                              |   |                      |
|----------------------------------------------|---|----------------------|
| Total number of pregnancies since last visit | 1 | <input type="text"/> |
| Total number of births since last visit      | 2 | <input type="text"/> |

**2. Did you have a sexual partner since your last screening visit?**

|       |   |                                           |
|-------|---|-------------------------------------------|
| - yes | 1 | <input type="checkbox"/>                  |
| - no  | 2 | <input type="checkbox"/> Go to question 3 |

**If yes:****Have you had a new sexual partner since your last screening visit?**

|       |   |                          |
|-------|---|--------------------------|
| - yes | 1 | <input type="checkbox"/> |
| - no  | 2 | <input type="checkbox"/> |

How many sexual partners did you have since your last screening visit?

|  |  |  |        |
|--|--|--|--------|
|  |  |  | number |
|--|--|--|--------|

How often have you used condoms since your last screening visit?

|                                         |   |                          |
|-----------------------------------------|---|--------------------------|
| At every sexual intercourse             | 1 | <input type="checkbox"/> |
| Frequently but not at every intercourse | 2 | <input type="checkbox"/> |
| Rarely                                  | 3 | <input type="checkbox"/> |
| Only sexual intercourse without condoms | 4 | <input type="checkbox"/> |

3. Is your husband / cohabiter / regular partner circumcised?

|                                          |   |                          |
|------------------------------------------|---|--------------------------|
| Yes                                      | 1 | <input type="checkbox"/> |
| No                                       | 2 | <input type="checkbox"/> |
| No husband / cohabiter / regular partner | 3 | <input type="checkbox"/> |

### Hormonal Family Planning

4. Have you ever used hormonal family planning methods?

|       |   |                                                  |
|-------|---|--------------------------------------------------|
| - yes | 1 | <input type="checkbox"/>                         |
| - no  | 2 | <input type="checkbox"/> <b>Go to question 5</b> |



**If yes:**

**What type of hormonal contraceptives have you used?**

| Type                                       | No, never                  | Yes                        | If <u>yes</u> , how long have you used it overall? |                                                         |
|--------------------------------------------|----------------------------|----------------------------|----------------------------------------------------|---------------------------------------------------------|
| Birth control pills                        | 2 <input type="checkbox"/> | 1 <input type="checkbox"/> | <input type="text"/> <input type="text"/><br>years | and <input type="text"/> <input type="text"/><br>months |
| Birth control shot (Depo-provera)          | 2 <input type="checkbox"/> | 1 <input type="checkbox"/> | <input type="text"/> <input type="text"/><br>years | and <input type="text"/> <input type="text"/><br>months |
| Birth control implant (Implanon/ Nexoplan) | 2 <input type="checkbox"/> | 1 <input type="checkbox"/> | <input type="text"/> <input type="text"/><br>years | and <input type="text"/> <input type="text"/><br>months |
| Hormonal IUD (Mirena)                      | 2 <input type="checkbox"/> | 1 <input type="checkbox"/> | <input type="text"/> <input type="text"/><br>years | and <input type="text"/> <input type="text"/><br>months |

## HIV

**5. Have you tested positive for HIV since your last screening visit?**

|       |                            |                         |
|-------|----------------------------|-------------------------|
| - yes | 1 <input type="checkbox"/> |                         |
| - no  | 2 <input type="checkbox"/> | <b>Go to question 6</b> |

**If yes:**

**When did you test positive?**

 

calendar month

   

calendar year

**When did you have your last CD4 count test?**

*(If more than 6 months ago → refer the woman for a new test)*

 

calendar month

   

calendar year

**What was the result of the CD4 count? \_\_\_\_\_ number**

**Have you ever been started on ARV treatment?**

|       |                            |
|-------|----------------------------|
| - yes | 1 <input type="checkbox"/> |
| - no  | 2 <input type="checkbox"/> |

**If yes:**

**started when ?**

|                    |                                |                               |               |                                        |                                       |
|--------------------|--------------------------------|-------------------------------|---------------|----------------------------------------|---------------------------------------|
| <b>First line</b>  | 1 <input type="checkbox"/> Yes | 2 <input type="checkbox"/> No | <b>If yes</b> | <input type="text"/><br>calendar month | <input type="text"/><br>calendar year |
| <b>Second line</b> | 1 <input type="checkbox"/> Yes | 2 <input type="checkbox"/> No | <b>If yes</b> | <input type="text"/><br>calendar month | <input type="text"/><br>calendar year |
| <b>Third line</b>  | 1 <input type="checkbox"/> Yes | 2 <input type="checkbox"/> No | <b>If yes</b> | <input type="text"/><br>calendar month | <input type="text"/><br>calendar year |

**What is your CTC card number?**

\_\_\_\_\_   
Clinic name

\_\_\_\_\_   
Card number

**What is your CTC file number?**

\_\_\_\_\_   
File number

**If you do not know, can we call you and get the number?**

|       |                            |
|-------|----------------------------|
| - yes | 1 <input type="checkbox"/> |
| - no  | 2 <input type="checkbox"/> |

**ATTENDANCE TO FOLLOW-UP APPOINTMENT**

**6. Which of following tools were most important for you to remember your appointment today? (choose one answer)**

|                                                              |                            |                         |
|--------------------------------------------------------------|----------------------------|-------------------------|
| I remembered from my appointment card and came to the clinic | 1 <input type="checkbox"/> | <b>Go to question 8</b> |
| I had a sms-reminder and came to the clinic                  | 2 <input type="checkbox"/> | <b>Go to question 8</b> |
| A nurse called me and told me to come to the clinic          | 3 <input type="checkbox"/> | <b>Go to question 7</b> |
| A nurse visited me at home and told me to come to the clinic | 4 <input type="checkbox"/> | <b>Go to question 7</b> |
| A nurse visited and we had the appointment at my home        | 5 <input type="checkbox"/> | <b>Go to question 7</b> |

1  
2  
3  
4  
5  
6  
7  
8  
9  
10  
11  
12  
13  
14  
15  
16  
17  
18  
19  
20  
21  
22  
23  
24  
25  
26  
27  
28  
29  
30  
31  
32  
33  
34  
35  
36

**7. What are the main reasons why you did not come to the clinic before the nurse contacted you?**

|                                                             |                                           |                                          |
|-------------------------------------------------------------|-------------------------------------------|------------------------------------------|
| I could not afford transportation on my own                 | Yes <sub>1</sub> <input type="checkbox"/> | No <sub>2</sub> <input type="checkbox"/> |
| I did not think the appointment was important               | Yes <sub>1</sub> <input type="checkbox"/> | No <sub>2</sub> <input type="checkbox"/> |
| I had forgotten                                             | Yes <sub>1</sub> <input type="checkbox"/> | No <sub>2</sub> <input type="checkbox"/> |
| I was nervous about the result of the screening             | Yes <sub>1</sub> <input type="checkbox"/> | No <sub>2</sub> <input type="checkbox"/> |
| I was nervous about having a gynaecological examination     | Yes <sub>1</sub> <input type="checkbox"/> | No <sub>2</sub> <input type="checkbox"/> |
| House chores prevented me from coming                       | Yes <sub>1</sub> <input type="checkbox"/> | No <sub>2</sub> <input type="checkbox"/> |
| The clinic is too far away from my home                     | Yes <sub>1</sub> <input type="checkbox"/> | No <sub>2</sub> <input type="checkbox"/> |
| Rainy season/ public holidays                               | Yes <sub>1</sub> <input type="checkbox"/> | No <sub>2</sub> <input type="checkbox"/> |
| My family does not know that I go, so I have to go secretly | Yes <sub>1</sub> <input type="checkbox"/> | No <sub>2</sub> <input type="checkbox"/> |
| I had my period                                             | Yes <sub>1</sub> <input type="checkbox"/> | No <sub>2</sub> <input type="checkbox"/> |
| I was pregnant                                              | Yes <sub>1</sub> <input type="checkbox"/> | No <sub>2</sub> <input type="checkbox"/> |
| I had moved                                                 | Yes <sub>1</sub> <input type="checkbox"/> | No <sub>2</sub> <input type="checkbox"/> |
| Other (please write) .....                                  |                                           |                                          |

37  
38  
39  
40  
41  
42  
43  
44  
45  
46  
47  
48  
49  
50  
51  
52  
53  
54  
55  
56  
57  
58  
59  
60

**HEALTH EDUCATION BY MOBILE PHONE**

(ELIMU YA AFIA QUA SIM)

**8. Have you received any text messages (sms) regarding cervical cancer and your screening appointment at the clinic?**

|       |                                                                           |
|-------|---------------------------------------------------------------------------|
| - yes | <sub>1</sub> <input type="checkbox"/>                                     |
| - no  | <sub>2</sub> <input type="checkbox"/> (Questionnaire is <u>finished</u> ) |

**If yes:**

**How do you like the number of messages that you received?**

|                             |                                       |
|-----------------------------|---------------------------------------|
| Too many messages           | <sub>1</sub> <input type="checkbox"/> |
| Adequate amount of messages | <sub>2</sub> <input type="checkbox"/> |
| Too few messages            | <sub>3</sub> <input type="checkbox"/> |

**How do you feel about of the following statements? (If 'don't know' leave box empty)**

|                                                                                                    |                                           |                                          |
|----------------------------------------------------------------------------------------------------|-------------------------------------------|------------------------------------------|
| The information in the messages was easy to understand                                             | Yes <sup>1</sup> <input type="checkbox"/> | No <sup>2</sup> <input type="checkbox"/> |
| I did <i>not</i> need help from others to read the messages                                        | Yes <sup>1</sup> <input type="checkbox"/> | No <sup>2</sup> <input type="checkbox"/> |
| The information in messages made me uncomfortable                                                  | Yes <sup>1</sup> <input type="checkbox"/> | No <sup>2</sup> <input type="checkbox"/> |
| I know how to read text messages on my phone                                                       | Yes <sup>1</sup> <input type="checkbox"/> | No <sup>2</sup> <input type="checkbox"/> |
| I often send and receive text messages on my phone                                                 | Yes <sup>1</sup> <input type="checkbox"/> | No <sup>2</sup> <input type="checkbox"/> |
| I shared the health education that I got on my phone with friends or family                        | Yes <sup>1</sup> <input type="checkbox"/> | No <sup>2</sup> <input type="checkbox"/> |
| I would like to continue to receive health information by mobile phone                             | Yes <sup>1</sup> <input type="checkbox"/> | No <sup>2</sup> <input type="checkbox"/> |
| My husband or other family members was happy that I received health information on my mobile phone | Yes <sup>1</sup> <input type="checkbox"/> | No <sup>2</sup> <input type="checkbox"/> |
| I would recommend a friend or a family member to receive health education by mobile phone          | Yes <sup>1</sup> <input type="checkbox"/> | No <sup>2</sup> <input type="checkbox"/> |

**How do you feel about receiving health information and reminders of your appointment via sms on your mobile? (Choose the one smiley that best shows how you feel)**

*Utajisikiaje ukipata ujumbe mfupi wenye taarifa kuhusu saratani ya shingo ya kizazi na upimaji wake kwenye simu yako au? (Chagua tabasamu sahihi kuonyesha utakavyojisikia)*

 *I do not like it at all*

 *I do not like it*

 *It is not okay*

 *It is okay*

 *I like it*

 *I like it very much*

Here are some statements about cervical cancer. I will ask you to answer which are true and which are false? (*only for women that have received sms!*)

Sentensi zifuatazo zinahusu saratani ya shingo ya kizazi. Sema kweli au si kweli kwa kila sentensi

|                                                                                                                                                                                                           |                                |                                   |
|-----------------------------------------------------------------------------------------------------------------------------------------------------------------------------------------------------------|--------------------------------|-----------------------------------|
| 1. Malaria (mbu) inasababisha saratani ya shingo ya kizazi<br>(Malaria (mosquito) causes cervical cancer)                                                                                                 | Kweli <input type="checkbox"/> | Si kweli <input type="checkbox"/> |
| 2. Kupata maumivu wakati wa kukojoa ni dalili ya saratani ya shingo ya kizazi<br>(Pain during urination can be a sign of cervical cancer)                                                                 | Kweli <input type="checkbox"/> | Si kweli <input type="checkbox"/> |
| 3. Saratani ya shingo ya kizazi ndiyo inayoongoza kwa magonjwa ya kanza za wanawake hapa Tanzania<br>(Cervical cancer is the most common cancer disease among Tanzanian women)                            | Kweli <input type="checkbox"/> | Si kweli <input type="checkbox"/> |
| 4. Unaweza kupata saratani ya shingo ya kizazi kwa kubusiana<br>(You can get cervical cancer from deep kissing)                                                                                           | Kweli <input type="checkbox"/> | Si kweli <input type="checkbox"/> |
| 5. Inawezekana kujikinga na saratani ya shingo ya kizazi<br>(It is possible to prevent cervical cancer)                                                                                                   | Kweli <input type="checkbox"/> | Si kweli <input type="checkbox"/> |
| 6. Kutokwa damu ukeni ni dalili kuu ya ugonjwa wa saratani ya shingo ya kizazi<br>(Vaginal bleeding is the most common sign of cervical cancer)                                                           | Kweli <input type="checkbox"/> | Si kweli <input type="checkbox"/> |
| 7. Jua kali linaweza kusababisha saratani ya shingo ya kizazi<br>(Too much sun can lead to cervical cancer)                                                                                               | Kweli <input type="checkbox"/> | Si kweli <input type="checkbox"/> |
| 8. Maambukizi ya kwenye shingo ya kizazi mara zote hubadilika kuwa saratani<br>(A cervical infection will always turn into cancer)                                                                        | Kweli <input type="checkbox"/> | Si kweli <input type="checkbox"/> |
| 9. Wanawake wenye VVU wako kwenye hatari kubwa ya kupata saratani ya shingo ya kizazi<br>(HIV-positive women have higher risk of developing cervical cancer)                                              | Kweli <input type="checkbox"/> | Si kweli <input type="checkbox"/> |
| 10. Saratani ya shingo ya kizazi mara nyingi hugundulika mapema kutokana na dalili zake<br>(Cervical cancer is often found at an early stage due to obvious symptoms)                                     | Kweli <input type="checkbox"/> | Si kweli <input type="checkbox"/> |
| 11. Unaweza kupata saratani ya shingo ya kizazi kwa kujamiiana bila kinga<br>(You can get cervical cancer from unprotected sexual intercourse)                                                            | Kweli <input type="checkbox"/> | Si kweli <input type="checkbox"/> |
| 12. Kupima afya kunaweza kugundua maambukizi ya kwenye shingo ya kizazi na kuyazuia yasibalike kuwa saratani<br>(Screening can detect cervical infections so they do not develop into cancer)             | Kweli <input type="checkbox"/> | Si kweli <input type="checkbox"/> |
| 13. Saratani ya shingo ya kizazi inaongoza kwa kusababisha vifo vinavyotokana na saratani kwa wanawake hapa Tanzania<br>(Cervical cancer is the main cause of cancer-related death among Tanzanian women) | Kweli <input type="checkbox"/> | Si kweli <input type="checkbox"/> |
| 14. Saratani ya shingo ya kizazi mara nyingi huwapata wanawake wakiwa kwenye miaka ya ishirini.<br>(Cervical cancer is most common for women in their 20's)                                               | Kweli <input type="checkbox"/> | Si kweli <input type="checkbox"/> |
| 15. Kuwashwa ukeni kunaweza kuwa ni dalili ya saratani ya shingo ya kizazi<br>(Itchiness in the vaginal area can be a sign of cervical cancer)                                                            | Kweli <input type="checkbox"/> | Si kweli <input type="checkbox"/> |
| 16. Kirusi kinachoitwa Human papilloma virus ndicho kisababishacho saratani ya shingo ya kizazi<br>(A virus called "Humanpapiloma virus" (HPV) causes cervical cancer)                                    | Kweli <input type="checkbox"/> | Si kweli <input type="checkbox"/> |

1  
2  
3  
4  
5  
6  
7  
8  
9  
10  
11  
12  
13  
14  
15  
16  
17  
18  
19  
20  
21  
22  
23  
24  
25  
26  
27  
28  
29  
30  
31  
32  
33  
34  
35  
36  
37  
38  
39  
40  
41  
42  
43  
44  
45  
46  
47  
48  
49  
50  
51  
52  
53  
54  
55  
56  
57  
58  
59  
60

**Thanks a lot for your help**

**If there are any comments to add, please write them below**

---

---

---

---

For peer review only
