# Supplementary material for: Comprehensive Cervical Cancer Prevention in Tanzania (CONCEPT) study: Cohort profile
Source: PubMed Central journal article supplement — BMJ Open. 2020 Sep 18;10(9):e038531. doi: 10.1136/bmjopen-2020-038531 (PMC7511617; doi:10.1136/bmjopen-2020-038531), 2020-09-18
Supplement: bmjopen-2020-038531supp002.pdf [file bmjopen-2020-038531supp002.pdf]

STROBE Statement—Checklist of items that should be included in reports of *cohort studies*

|                          | Item No | Recommendation                                                                                                                                                                       | Response                                                                                                                                                                                                          |
|--------------------------|---------|--------------------------------------------------------------------------------------------------------------------------------------------------------------------------------------|-------------------------------------------------------------------------------------------------------------------------------------------------------------------------------------------------------------------|
| Title and abstract       | 1       | (a) Indicate the study's design with a commonly used term in the title or the abstract                                                                                               | Indicated as Cohort in all appropriate sections                                                                                                                                                                   |
|                          |         | (b) Provide in the abstract an informative and balanced summary of what was done and what was found                                                                                  | Indicated in the section "abstract"                                                                                                                                                                               |
| <b>Introduction</b>      |         |                                                                                                                                                                                      |                                                                                                                                                                                                                   |
| Background/rationale     | 2       | Explain the scientific background and rationale for the investigation being reported                                                                                                 | Explanation provided in the "Introduction" section                                                                                                                                                                |
| Objectives               | 3       | State specific objectives, including any prespecified hypotheses                                                                                                                     | These has been provided in ll. 33-34; 126-128                                                                                                                                                                     |
| <b>Methods</b>           |         |                                                                                                                                                                                      |                                                                                                                                                                                                                   |
| Study design             | 4       | Present key elements of study design early in the paper                                                                                                                              | Indicated in the sub section "study design and study population", ll. 131-180                                                                                                                                     |
| Setting                  | 5       | Describe the setting, locations, and relevant dates, including periods of recruitment, exposure, follow-up, and data collection                                                      | Indicated in the sub sections "study design and study population", ll. 131-180; "assessment of exposure, ll. 181-237; "outcome measures; ll. 239-248; "table 1: Overview of data collected in the CONCEPT cohort" |
| Participants             | 6       | (a) Give the eligibility criteria, and the sources and methods of selection of participants. Describe methods of follow-up                                                           | Indicated in the sub sections "study design and study population", ll. 131-180; "assessment of exposure, ll. 181-237; "outcome measures; ll. 239-248;                                                             |
|                          |         | (b) For matched studies, give matching criteria and number of exposed and unexposed                                                                                                  | NA - No matching was done                                                                                                                                                                                         |
| Variables                | 7       | Clearly define all outcomes, exposures, predictors, potential confounders, and effect modifiers. Give diagnostic criteria, if applicable                                             | Indicated in the sub sections "assessment of exposure, ll. 181-237; "outcome measures; ll. 239-248                                                                                                                |
| Data sources/measurement | 8*      | For each variable of interest, give sources of data and details of methods of assessment (measurement). Describe comparability of assessment methods if there is more than one group | Description of this item has been provided in table 1 - Overview of data collection                                                                                                                               |
| Bias                     | 9       | Describe any efforts to address potential sources of bias                                                                                                                            | Indicated in the sub sections                                                                                                                                                                                     |

|                        |     |                                                                                                                                                                                                   |                                                                                                                                                                                                             |
|------------------------|-----|---------------------------------------------------------------------------------------------------------------------------------------------------------------------------------------------------|-------------------------------------------------------------------------------------------------------------------------------------------------------------------------------------------------------------|
|                        |     |                                                                                                                                                                                                   | “assessment of exposure, ll. 181-237;<br>“outcome measures; ll. 239-248                                                                                                                                     |
| Study size             | 10  | Explain how the study size was arrived at                                                                                                                                                         | NA                                                                                                                                                                                                          |
| Quantitative variables | 11  | Explain how quantitative variables were handled in the analyses. If applicable, describe which groupings were chosen and why                                                                      | An overview of data management has been provided in the sub section “Data management”, ll. 250-257. Detailed description of the statistical analysis may be provided in the respective individual articles. |
| Statistical methods    | 12  | (a) Describe all statistical methods, including those used to control for confounding                                                                                                             | An overview of data management has been provided in the sub section “Data management”, ll. 250-257. Detailed description of the statistical analysis may be provided in the respective individual articles. |
|                        |     | (b) Describe any methods used to examine subgroups and interactions                                                                                                                               | An overview of data management has been provided in the sub section “Data management”, ll. 250-257. Detailed description of the statistical analysis may be provided in the respective individual articles. |
|                        |     | (c) Explain how missing data were addressed                                                                                                                                                       | Missing data for selected variables are described in Table 1 and Table 2.                                                                                                                                   |
|                        |     | (d) If applicable, explain how loss to follow-up was addressed                                                                                                                                    | Indicated in the sub sections “study design and study population”, ll. 131-180.                                                                                                                             |
|                        |     | (e) Describe any sensitivity analyses                                                                                                                                                             | NA                                                                                                                                                                                                          |
| <b>Results</b>         |     |                                                                                                                                                                                                   |                                                                                                                                                                                                             |
| Participants           | 13* | (a) Report numbers of individuals at each stage of study—eg numbers potentially eligible, examined for eligibility, confirmed eligible, included in the study, completing follow-up, and analysed | This information has been provided in the flow chart, figure 1.                                                                                                                                             |
|                        |     | (b) Give reasons for non-participation at each stage                                                                                                                                              | This information has been provided in the flow chart, figure 1                                                                                                                                              |
|                        |     | (c) Consider use of a flow diagram                                                                                                                                                                | Flow chart has been provided, figure 1                                                                                                                                                                      |

|                          |     |                                                                                                                                                                                                              |                                                                                                     |
|--------------------------|-----|--------------------------------------------------------------------------------------------------------------------------------------------------------------------------------------------------------------|-----------------------------------------------------------------------------------------------------|
| Descriptive data         | 14* | (a) Give characteristics of study participants (eg demographic, clinical, social) and information on exposures and potential confounders                                                                     | Relevant characteristics of the participants and their distribution has been provided in Table 2    |
|                          |     | (b) Indicate number of participants with missing data for each variable of interest                                                                                                                          | Information on missing values has been provided for each variable in Table 2 & Table 3              |
|                          |     | (c) Summarise follow-up time (eg, average and total amount)                                                                                                                                                  |                                                                                                     |
| Outcome data             | 15* | Report numbers of outcome events or summary measures over time                                                                                                                                               | Table 2 and 3 provide a measure of important events at a baseline and follow-up                     |
| Main results             | 16  | (a) Give unadjusted estimates and, if applicable, confounder-adjusted estimates and their precision (eg, 95% confidence interval). Make clear which confounders were adjusted for and why they were included | Table 3 provides Confidence interval of the important outcome measures at baseline and on follow up |
|                          |     | (b) Report category boundaries when continuous variables were categorized                                                                                                                                    |                                                                                                     |
|                          |     | (c) If relevant, consider translating estimates of relative risk into absolute risk for a meaningful time period                                                                                             | NA                                                                                                  |
| Other analyses           | 17  | Report other analyses done—eg analyses of subgroups and interactions, and sensitivity analyses                                                                                                               | NA                                                                                                  |
| <b>Discussion</b>        |     |                                                                                                                                                                                                              |                                                                                                     |
| Key results              | 18  | Summarise key results with reference to study objectives                                                                                                                                                     | NA. Cohort profile. However, summarized in “abstract”.                                              |
| Limitations              | 19  | Discuss limitations of the study, taking into account sources of potential bias or imprecision. Discuss both direction and magnitude of any potential bias                                                   | Indicated in the section “Strengths and limitations”, ll. 319-338.                                  |
| Interpretation           | 20  | Give a cautious overall interpretation of results considering objectives, limitations, multiplicity of analyses, results from similar studies, and other relevant evidence                                   | NA. Cohort profile                                                                                  |
| Generalisability         | 21  | Discuss the generalisability (external validity) of the study results                                                                                                                                        | Indicated in the section “Strengths and limitations”, ll. 319-338.                                  |
| <b>Other information</b> |     |                                                                                                                                                                                                              |                                                                                                     |
| Funding                  | 22  | Give the source of funding and the role of the funders for the present study and, if applicable, for the original study on which the present article is based                                                | Indicated in the section “financial disclosure”, ll. 359-361.                                       |

\*Give information separately for exposed and unexposed groups.
