# Supplementary material for: Comprehensive Cervical Cancer Prevention in Tanzania (CONCEPT) study: Cohort profile
Source: PubMed Central journal article supplement — BMJ Open. 2020 Sep 18;10(9):e038531. doi: 10.1136/bmjopen-2020-038531 (PMC7511617; doi:10.1136/bmjopen-2020-038531), 2020-09-18
Supplement: bmjopen-2020-038531supp004.pdf [file bmjopen-2020-038531supp004.pdf]

\_\_\_\_\_

Baseline Study number

\_\_\_\_\_

Follow-up Study number

# Concept

Comprehensive Prevention of Cervical Cancer in Tanzania

## FOLLOW-UP QUESTIONNAIRE

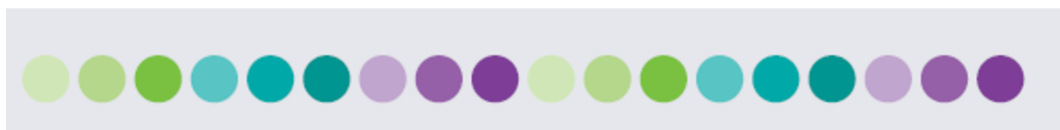

Study site: ORCI KCMC MAWENZI 

Date \_\_\_\_\_

Follow-up Study number \_\_\_\_\_

Baseline Study number \_\_\_\_\_

Health Provider Initials \_\_\_\_\_

Participant initials \_\_\_\_\_

**REPRODUCTIVE HEALTH and SEXUAL HABITS****1. Have you given birth since your last screening visit?**

|       |   |                                             |
|-------|---|---------------------------------------------|
| - yes | 1 | <input type="checkbox"/>                    |
| - no  | 2 | <input type="checkbox"/> → Go to question 2 |

**If yes:**

|                                              |   |                      |
|----------------------------------------------|---|----------------------|
| Total number of pregnancies since last visit | 1 | <input type="text"/> |
| Total number of births since last visit      | 2 | <input type="text"/> |

**2. Did you have a sexual partner since your last screening visit?**

|       |   |                                           |
|-------|---|-------------------------------------------|
| - yes | 1 | <input type="checkbox"/>                  |
| - no  | 2 | <input type="checkbox"/> Go to question 3 |

**If yes:****Have you had a new sexual partner since your last screening visit?**

|       |   |                          |
|-------|---|--------------------------|
| - yes | 1 | <input type="checkbox"/> |
| - no  | 2 | <input type="checkbox"/> |

**How many sexual partners did you have since your last screening visit?**

|  |  |  |  |        |
|--|--|--|--|--------|
|  |  |  |  | number |
|--|--|--|--|--------|

**How often have you used condoms since your last screening visit?**

|                                         |   |                          |
|-----------------------------------------|---|--------------------------|
| At every sexual intercourse             | 1 | <input type="checkbox"/> |
| Frequently but not at every intercourse | 2 | <input type="checkbox"/> |
| Rarely                                  | 3 | <input type="checkbox"/> |
| Only sexual intercourse without condoms | 4 | <input type="checkbox"/> |

**3. Is your husband / cohabiter / regular partner circumcised?**

|                                          |   |                          |
|------------------------------------------|---|--------------------------|
| Yes                                      | 1 | <input type="checkbox"/> |
| No                                       | 2 | <input type="checkbox"/> |
| No husband / cohabiter / regular partner | 3 | <input type="checkbox"/> |

### **Hormonal Family Planning**

**4. Have you ever used hormonal family planning methods?**

|       |   |                          |                         |
|-------|---|--------------------------|-------------------------|
| - yes | 1 | <input type="checkbox"/> |                         |
| - no  | 2 | <input type="checkbox"/> | <b>Go to question 5</b> |

**If yes:****What type of hormonal contraceptives have you used?**

| Type                                       | No, never                  | Yes                        | If <b>yes</b> , how long have you used it overall? |                                 |
|--------------------------------------------|----------------------------|----------------------------|----------------------------------------------------|---------------------------------|
| Birth control pills                        | 2 <input type="checkbox"/> | 1 <input type="checkbox"/> | <input type="text"/> years                         | and <input type="text"/> months |
| Birth control shot (Depo-provera)          | 2 <input type="checkbox"/> | 1 <input type="checkbox"/> | <input type="text"/> years                         | and <input type="text"/> months |
| Birth control implant (Implanon/ Nexoplan) | 2 <input type="checkbox"/> | 1 <input type="checkbox"/> | <input type="text"/> years                         | and <input type="text"/> months |
| Hormonal IUD (Mirena)                      | 2 <input type="checkbox"/> | 1 <input type="checkbox"/> | <input type="text"/> years                         | and <input type="text"/> months |

**HIV****5. Have you tested positive for HIV since your last screening visit?**

|       |                                                    |
|-------|----------------------------------------------------|
| - yes | 1 <input type="checkbox"/>                         |
| - no  | 2 <input type="checkbox"/> <b>Go to question 6</b> |

**If yes:****When did you test positive?**

calendar month

calendar year

**When did you have your last CD4 count test?***(If more than 6 months ago → refer the woman for a new test)*

calendar month

calendar year

**What was the result of the CD4 count? \_\_\_\_\_ number****Have you ever been started on ARV treatment?**

|       |                            |
|-------|----------------------------|
| - yes | 1 <input type="checkbox"/> |
| - no  | 2 <input type="checkbox"/> |

**If yes:****started when ?**

|                    |                                           |                                          |               |                                        |                                       |
|--------------------|-------------------------------------------|------------------------------------------|---------------|----------------------------------------|---------------------------------------|
| <b>First line</b>  | <sub>1</sub> <input type="checkbox"/> Yes | <sub>2</sub> <input type="checkbox"/> No | <b>If yes</b> | <input type="text"/><br>calendar month | <input type="text"/><br>calendar year |
| <b>Second line</b> | <sub>1</sub> <input type="checkbox"/> Yes | <sub>2</sub> <input type="checkbox"/> No | <b>If yes</b> | <input type="text"/><br>calendar month | <input type="text"/><br>calendar year |
| <b>Third line</b>  | <sub>1</sub> <input type="checkbox"/> Yes | <sub>2</sub> <input type="checkbox"/> No | <b>If yes</b> | <input type="text"/><br>calendar month | <input type="text"/><br>calendar year |

**What is your CTC card number?**\_\_\_\_\_  
Clinic name\_\_\_\_\_  
Card number**What is your CTC file number?**\_\_\_\_\_  
File number**If you do not know, can we call you and get the number?**

|       |                                       |
|-------|---------------------------------------|
| - yes | <sub>1</sub> <input type="checkbox"/> |
| - no  | <sub>2</sub> <input type="checkbox"/> |

**ATTENDANCE TO FOLLOW-UP APPOINTMENT****6. Which of following tools were most important for you to remember your appointment today? (choose one answer)**

|                                                              |                                       |                         |
|--------------------------------------------------------------|---------------------------------------|-------------------------|
| I remembered from my appointment card and came to the clinic | <sub>1</sub> <input type="checkbox"/> | <b>Go to question 8</b> |
| I had a sms-reminder and came to the clinic                  | <sub>2</sub> <input type="checkbox"/> | <b>Go to question 8</b> |
| A nurse called me and told me to come to the clinic          | <sub>3</sub> <input type="checkbox"/> | <b>Go to question 7</b> |
| A nurse visited me at home and told me to come to the clinic | <sub>4</sub> <input type="checkbox"/> | <b>Go to question 7</b> |
| A nurse visited and we had the appointment at my home        | <sub>5</sub> <input type="checkbox"/> | <b>Go to question 7</b> |

**7. What are the main reasons why you did not come to the clinic before the nurse contacted you?**

|                                                             |                                           |                                          |
|-------------------------------------------------------------|-------------------------------------------|------------------------------------------|
| I could not afford transportation on my own                 | Yes <sub>1</sub> <input type="checkbox"/> | No <sub>2</sub> <input type="checkbox"/> |
| I did not think the appointment was important               | Yes <sub>1</sub> <input type="checkbox"/> | No <sub>2</sub> <input type="checkbox"/> |
| I had forgotten                                             | Yes <sub>1</sub> <input type="checkbox"/> | No <sub>2</sub> <input type="checkbox"/> |
| I was nervous about the result of the screening             | Yes <sub>1</sub> <input type="checkbox"/> | No <sub>2</sub> <input type="checkbox"/> |
| I was nervous about having a gynaecological examination     | Yes <sub>1</sub> <input type="checkbox"/> | No <sub>2</sub> <input type="checkbox"/> |
| House chores prevented me from coming                       | Yes <sub>1</sub> <input type="checkbox"/> | No <sub>2</sub> <input type="checkbox"/> |
| The clinic is too far away from my home                     | Yes <sub>1</sub> <input type="checkbox"/> | No <sub>2</sub> <input type="checkbox"/> |
| Rainy season/ public holidays                               | Yes <sub>1</sub> <input type="checkbox"/> | No <sub>2</sub> <input type="checkbox"/> |
| My family does not know that I go, so I have to go secretly | Yes <sub>1</sub> <input type="checkbox"/> | No <sub>2</sub> <input type="checkbox"/> |
| I had my period                                             | Yes <sub>1</sub> <input type="checkbox"/> | No <sub>2</sub> <input type="checkbox"/> |
| I was pregnant                                              | Yes <sub>1</sub> <input type="checkbox"/> | No <sub>2</sub> <input type="checkbox"/> |
| I had moved                                                 | Yes <sub>1</sub> <input type="checkbox"/> | No <sub>2</sub> <input type="checkbox"/> |
| Other (please write) .....                                  |                                           |                                          |

**HEALTH EDUCATION BY MOBILE PHONE**

(ELIMU YA AFIA QUA SIM)

**8. Have you received any text messages (sms) regarding cervical cancer and your screening appointment at the clinic?**

|       |                                                                           |
|-------|---------------------------------------------------------------------------|
| - yes | <sub>1</sub> <input type="checkbox"/>                                     |
| - no  | <sub>2</sub> <input type="checkbox"/> (Questionnaire is <b>finished</b> ) |

**If yes:**

**How do you like the number of messages that you received?**

|                             |                                       |
|-----------------------------|---------------------------------------|
| Too many messages           | <sub>1</sub> <input type="checkbox"/> |
| Adequate amount of messages | <sub>2</sub> <input type="checkbox"/> |
| Too few messages            | <sub>3</sub> <input type="checkbox"/> |

**How do you feel about of the following statements? (If 'don't know' leave box empty)**

|                                                                                                    |                                           |                                          |
|----------------------------------------------------------------------------------------------------|-------------------------------------------|------------------------------------------|
| The information in the messages was easy to understand                                             | Yes <sub>1</sub> <input type="checkbox"/> | No <sub>2</sub> <input type="checkbox"/> |
| I did <i>not</i> need help from others to read the messages                                        | Yes <sub>1</sub> <input type="checkbox"/> | No <sub>2</sub> <input type="checkbox"/> |
| The information in messages made me uncomfortable                                                  | Yes <sub>1</sub> <input type="checkbox"/> | No <sub>2</sub> <input type="checkbox"/> |
| I know how to read text messages on my phone                                                       | Yes <sub>1</sub> <input type="checkbox"/> | No <sub>2</sub> <input type="checkbox"/> |
| I often send and receive text messages on my phone                                                 | Yes <sub>1</sub> <input type="checkbox"/> | No <sub>2</sub> <input type="checkbox"/> |
| I shared the health education that I got on my phone with friends or family                        | Yes <sub>1</sub> <input type="checkbox"/> | No <sub>2</sub> <input type="checkbox"/> |
| I would like to continue to receive health information by mobile phone                             | Yes <sub>1</sub> <input type="checkbox"/> | No <sub>2</sub> <input type="checkbox"/> |
| My husband or other family members was happy that I received health information on my mobile phone | Yes <sub>1</sub> <input type="checkbox"/> | No <sub>2</sub> <input type="checkbox"/> |
| I would recommend a friend or a family member to receive health education by mobile phone          | Yes <sub>1</sub> <input type="checkbox"/> | No <sub>2</sub> <input type="checkbox"/> |

**How do you feel about receiving health information and reminders of your appointment via sms on your mobile? (Choose the one smiley that best shows how you feel)**

*Utajisikiaje ukipata ujumbe mfupi wenye taarifa kuhusu saratani ya shingo ya kizazi na upimaji wake kwenye simu yako au? (Chagua tabasamu sahihi kuonyesha utakavyojisikia)*

-  *I do not like it at all*
-  *I do not like it*
-  *It is not okay*
-  *It is okay*
-  *I like it*
-  *I like it very much*

**Here are some statements about cervical cancer. I will ask you to answer which are true and which are false? (only for women that have received sms'!)**

*Sentensi zifuatazo zinahusu saratani ya shingo ya kizazi. Sema kweli au si kweli kwa kila sentensi*

|                                                                                                                                                                                                                         |                                |                                   |
|-------------------------------------------------------------------------------------------------------------------------------------------------------------------------------------------------------------------------|--------------------------------|-----------------------------------|
| <b>1. Malaria (mbu) inasababisha saratani ya shingo ya kizazi</b><br><i>(Malaria (mosquito ) causes cervical cancer)</i>                                                                                                | Kweli <input type="checkbox"/> | Si kweli <input type="checkbox"/> |
| <b>2. Kupata maumivu wakati wa kukojoa ni dalili ya saratani ya shingo ya kizazi</b><br><i>(Pain during urination can be a sign of cervical cancer)</i>                                                                 | Kweli <input type="checkbox"/> | Si kweli <input type="checkbox"/> |
| <b>3. Saratani ya shingo ya kizazi ndiyo inayoongoza kwa magonjwa ya kanza za wanawake hapa Tanzania</b><br><i>(Cervical cancer is the most common cancer disease among Tanzanian women)</i>                            | Kweli <input type="checkbox"/> | Si kweli <input type="checkbox"/> |
| <b>4. Unaweza kupata saratani ya shingo ya kizazi kwa kubusiana</b><br><i>(You can get cervical cancer from deep kissing)</i>                                                                                           | Kweli <input type="checkbox"/> | Si kweli <input type="checkbox"/> |
| <b>5. Inawezekana kujikinga na saratani ya shingo ya kizazi</b><br><i>(It is possible to prevent cervical cancer)</i>                                                                                                   | Kweli <input type="checkbox"/> | Si kweli <input type="checkbox"/> |
| <b>6. Kutokwa damu ukeni ni dalili kuu ya ugonjwa wa saratani ya shingo ya kizazi</b><br><i>(Vaginal bleeding is the most common sign of cervical cancer)</i>                                                           | Kweli <input type="checkbox"/> | Si kweli <input type="checkbox"/> |
| <b>7. Jua kali linaweza kusababisha saratani ya shingo ya kizazi</b><br><i>(Too much sun can lead to cervical cancer)</i>                                                                                               | Kweli <input type="checkbox"/> | Si kweli <input type="checkbox"/> |
| <b>8. Maambukizi ya kwenye shingo ya kizazi mara zote hubadilika kuwa saratani</b><br><i>(A cervical infection will always turn into cancer)</i>                                                                        | Kweli <input type="checkbox"/> | Si kweli <input type="checkbox"/> |
| <b>9. Wanawake wenye VVU wako kwenye hatari kubwa ya kupata saratani ya shingo ya kizazi</b><br><i>(HIV-positive women have higher risk of developing cervical cancer)</i>                                              | Kweli <input type="checkbox"/> | Si kweli <input type="checkbox"/> |
| <b>10. Saratani ya shingo ya kizazi mara nyingi hugundulika mapema kutokana na dalili zake</b><br><i>(Cervical cancer is often found at an early stage due to obvious symptoms)</i>                                     | Kweli <input type="checkbox"/> | Si kweli <input type="checkbox"/> |
| <b>11. Unaweza kupata saratani ya shingo ya kizazi kwa kujamiiana bila kinga</b><br><i>(You can get cervical cancer from unprotected sexual intercourse)</i>                                                            | Kweli <input type="checkbox"/> | Si kweli <input type="checkbox"/> |
| <b>12. Kupima afya kunaweza kugundua maambukizi ya kwenye shingo ya kizazi na kuyazuia yasibalike kuwa saratani</b><br><i>(Screening can detect cervical infections so they do not develop into cancer)</i>             | Kweli <input type="checkbox"/> | Si kweli <input type="checkbox"/> |
| <b>13. Saratani ya shingo ya kizazi inaongoza kwa kusababisha vifo vinavyotokana na saratani kwa wanawake hapa Tanzania</b><br><i>(Cervical cancer is the main cause of cancer-related death among Tanzanian women)</i> | Kweli <input type="checkbox"/> | Si kweli <input type="checkbox"/> |
| <b>14. Saratani ya shingo ya kizazi mara nyingi huwapata wanawake wakiwa kwenye miaka ya ishirini.</b><br><i>(Cervical cancer is most common for women in their 20's)</i>                                               | Kweli <input type="checkbox"/> | Si kweli <input type="checkbox"/> |
| <b>15. Kuwashwa ukeni kunaweza kuwa ni dalili ya saratani ya shingo ya kizazi</b><br><i>(Itchiness in the vaginal area can be a sign of cervical cancer)</i>                                                            | Kweli <input type="checkbox"/> | Si kweli <input type="checkbox"/> |
| <b>16. Kirusi kinachoitwa Human papilloma virus ndicho kisababishacho saratani ya shingo ya kizazi</b><br><i>(A virus called "Humanpapiloma virus" (HPV) causes cervical cancer)</i>                                    | Kweli <input type="checkbox"/> | Si kweli <input type="checkbox"/> |



**Thanks a lot for your help**

**If there are any comments to add, please write them below**

---

---

---

---
